# Supplementary material
Source: PubMed Central journal article supplement (PMC2786806)
Supplement: JCI40115sd.pdf [file JCI40115sd.pdf]

## Supplementary Information

### Supplementary Methods

#### *Evaluation of the Affymetrix Rhesus Macaque GeneChip for use on Sooty Mangabey Samples*

Gene expression in rhesus macaques and sooty mangabeys was monitored using the Affymetrix Rhesus Genome Array which contains probesets for ~47, 000 transcripts (1) and has been tested rigorously by independent primate centers (2) These arrays were designed using rhesus cDNA and genomic rhesus sequences from multiple sources (1). Prior to the availability of rhesus macaque arrays, several groups, including our own, have published microarray studies hybridizing samples from various non-human primates on arrays with probes specific for human sequences, however a central concern has been cross-species specificity of these arrays. At the onset of this study, we were concerned with the ability of the Rhesus Genome Array to accurately hybridize cRNA derived from SMs, and whether data from the arrays would allow meaningful comparison between RM and SM samples. The design of probesets for this array employed an algorithm in which macaque subsequences most orthologous between human and macaque were utilized; to further reduce the effect of polymorphisms, 16 probes per probeset (rather than the customary 11) were used for ~15,000 probesets (1). A recent study comparing 1,180 transcripts between rhesus macaques and humans have estimated the average degree of nucleotide identity to be  $97.79\pm 1.78\%$  in the coding region, and  $95.10\pm 4.15\%$  in the 3' UTR (3), with less than 1% of genes having lower than 88% homology. To minimize the effect of individual probes with sequence mismatches due to interpecies variation, we

used the Robust Multi-Array analysis for normalization and probeset summarization of the dataset. We feel that RMA normalization is the most appropriate method for interspecies comparisons for two reasons: (i) the global background adjustment (as opposed to background correction at the probe level, ie. Perfect Match – Mismatch correction) will reduce the effect of mismatches on expression measurements at the probe level, and (ii) the use of median polish to summarize individual probes into probeset measurements is robust and the effect of individual probes with sequence variation due to interspecies differences is minimized. Lastly, as described in detail below, we limited our analysis to include only genes for which (i) a two-fold change in expression relative to uninfected samples could be detected, and (ii) the gene expression change was determined to be statistically significant. Including the requirement of a two-fold ratio cut-off in our analysis, rather than direct comparison of probeset intensities, would further reduce false-negative comparisons between the species. Based on the high degree of cDNA transcript identity between SMs and RMs, the probe design of the Rhesus GeneChip towards orthologous sequences, and our data analysis approach, we reasoned that the Rhesus GeneChip would be able to accurately detect changes in sooty mangabey transcript levels, and that our analysis would be focused on genes that could be meaningfully compared between species. Nevertheless, to confirm the utility of the array for our analysis, we employed *in silico* analyses prior to hybridization and post-analysis validation experiments of our results from the main study.

To predict the overall binding ability of the Rhesus GeneChip with SM cDNAs, we performed an *in silico* analysis of perfect and mismatch binding based on SM sequences in GenBank and individual probes on the array. Due to the variation in

annotation of probesets on the Affymetrix RM Array, probesets were matched to genes based on the presence of at least one perfect match within the gene sequence. In some cases multiple genes matched with a single probeset due to the presence of multiple alleles or orthologs of particular genes within the set of sequences. The resultant probesets were then aligned using Clustal to the available sequence and probes within each set were binned based on the number of mismatches and/or indels between the probe and the sequence. Probes with >5 mismatches or containing indels are likely not contained within the query sequence. As detailed in Supplementary Table S2, 54 of the 100 sequences were successfully aligned with probesets on the Affymetrix RM array. These 54 sequences represent 42 unique genes. In almost all cases where probesets aligned with their intended gene (e.g. not a close paralog), the number of perfect match probes outnumbered the probes containing mismatches. Because of the median polish summarization employed by the RMA algorithm, and our estimate that most probesets have a majority of probes that match perfectly with SM sequences, we felt any effect due to interspecies sequence variation on the arrays would be minimal. An independent analysis by (C. Davies, Affymetrix, Inc., pers. communication) verified our findings.

To verify that hybridization efficiency was similar between RMs and SMs, we calculated the global statistics of the log<sub>10</sub> intensity on all 94 arrays described in this study. The array data was pre-filtered to exclude all probesets representing control sequences, viral genomes or reporter genes. As summarized in Supplementary Table S1, the means, medians, ranges and standard deviations on arrays hybridized with total RNA from SMs (33 arrays) or RMs (61 arrays) were nearly identical, and were very similar to the cumulative statistics from all 94 arrays. The distribution of log<sub>10</sub> intensities on each

individual array is depicted in Supplementary Figure S1. Similar to the global statistics for each species, the RM arrays have a slightly larger range of expression values compared to those hybridized with SM RNA, and arrays hybridized with SM samples have a moderately higher median intensity; however no gross differences were apparent between species hybridization statistics. Collectively, these data validate our *in silico* model of hybridization of SM RNA on the Rhesus GeneChips. More importantly, these data indicate that gene expression measurements obtained from hybridizing SM RNA samples to the Rhesus GeneChips is directly comparable to data obtained from RM samples.

*Microarray data analysis – normalization, principal components analysis, hierarchical clustering*

Arrays were scanned using the Affymetrix GeneChip Scanner 3000 7G, and visual inspection and evaluation of overall intensity was used to judge the quality of the hybridization; 2 of 96 total arrays were judged to be of low quality and removed from the analysis. .CEL files from the remaining Rhesus GeneChip arrays were imported into Partek Genomics Suite v.6.4 (Partek, Inc. St. Louis, MO) and RMA pre-processing was used to perform global background correction, quantile normalization and median polish probeset summarization. Probeset annotation was based on NetAffx Annotation Release 27 (November 2008, Affymetrix, Inc.) which utilizes the most update-to-date build of the rhesus macaque genome (Unigene *Macaca mulatta* Build #13, September, 2008). After generation of smaller gene lists (ie. One-way ANOVA to define SIV-inducible genes in SMs), probeset annotations were further updated using the DAVID annotation tool

(<http://david.abcc.ncifcrf.gov/>) (3-4). For probesets with no Unigene rhesus macaque identifier, the Gene Symbol for the human orthologue was used. Similarity between samples was estimated using principal component analysis was used to reduce the log<sub>10</sub> intensities on individual arrays and using a covariance dispersion matrix and normalized eigenvector scaling. PC#1 (37.4%), PC#2 (11.7%) and PC#3 (7.8%) accounted for 56.9% of the variance in the dataset. Hierarchical clusters between samples or between genes were assembled using Euclidean metric and average linkage to determine distance between datasets and clusters, respectively.

*Identification of genes induced by SIV infection and genes with differential SIV regulation between species*

One-way ANOVA was used to test for differences in the log<sub>10</sub> intensities of individual probesets in the sooty mangabey group (33 arrays) after infection, and the P-value was corrected for multiple hypothesis testing using the Benjamini-Hochberg False Discovery Rate method. This corrected P-value was 0.0008342 was used in combination with a second criteria, a two-fold change up or down, in the average gene expression relative to pre-infected samples ( $\log_{10} \text{time } X - \text{Log}_{10} \text{time } 0 > 0.301$  or  $< -0.301$ ) to define differentially expressed genes. The same algorithm was used to identify differentially expressed genes in the SIVmac239-infected RM group (36 arrays, corrected P-value = 0.00746). Although fairly stringent by current standards, this approach allowed us to have a high degree of confidence in probesets/genes defined as differential. The utility of our approach in identifying genes with SIV-inducible expression in SMs and RMs was

supported by the high degree of overlap between our SM/RM dataset and concurrent, independent, studies detailing SIV infection in AGMs (5) and previously published observations from our group in SHIV89.6P infected cynomolgus macaques (6).

Because of the differences in sample sizes between the SIVsmm SM (33 arrays), SIVsmm RM (25 arrays) and SIVmac239 RM (36 arrays) groups, a direct Boolean analysis to determine SIV-regulated genes that differed between species would not be appropriate; exclusion of a gene from one group and not another may be due to differing P-values rather than underlying biology. Instead, we employed a two-layered approach. In the first step, we used a two-way ANOVA to define genes with expression that differed (i) between the three infection groups, and (ii) over time after infection. This gene list was further reduced by a post-hoc filter to include only genes that also exhibited significantly different expression values between SMs and both RM groups. This initial gene list was large (>20,000 probesets) and we reasoned that it included genes with differential expression due to (i) species-specific differences in constitutive expression, (ii) differing hybridization efficiency of genes with sequence disparity, or (iii) distinct patterns of transcription in response to SIV infection. To focus our analysis on the latter, we added a second step to the analysis: only genes that were defined as SIV-inducible for each individual infection group by the initial filter (one-way ANOVA, and a 2-fold average change) were included. This reduced the dataset considerably, such that the list of genes that were SIV-inducible in SMs and differed from RMs was comprised of 239 individual probesets. Supporting the efficacy of this approach was the observation that the probesets representing CCR5 and MKI67, two genes with well-described differences

in SIV induction *in vivo* between RMs and SMs (7-8), were identified by this analysis (Supplemental Table S6).

#### *Identifying genes that correlate with immune activation*

To identify genes correlated with T cell activation in SIVmac239-infected RMs, we correlated gene expression measured the arrays with proliferation/activation marker expression measure by flow cytometry. The appearance of markers of immune activation on CD4+ and CD8+ T cells have been comprehensively demonstrated to be an accurate indicator of disease progression in HIV infection (9-10). As a preliminary step, we compared the Pearson correlation between the percentage of various activation markers on CD3+CD4+ and CD3+CD8+ T lymphocytes and their normalized log10 intensity measured by the array for individual SIVmac239 animals. This analysis was performed for CD38, HLA-DR, CD69, CD25 and Ki-67; we found that the percentage of Ki-67 on CD3+CD8+ T cells had the strongest, and most significant correlation ( $r = 0.6854$ ,  $P = 5.70 \times 10^{-5}$ ). Because Ki-67 has also been reported to be the most reliable marker of immune activation in SIV-infected non-human primates (11), we reasoned that it would be the best marker to identify novel genes potentially regulating pathogenic immune activation. We performed Pearson correlations between the percentage of Ki-67+CD3+CD8+ cells of individual SIVmac239 infected animals and the normalized Log10 intensity values of 830 probesets determined to be SIV-induced by ANOVA, the P-value was adjusted using Benjamini-Hochberg FDR to a cutoff value of 0.0106, filtering the list to 177 probesets (Supplementary Table S9). Inspection of the gene list

provided support that this analysis was capable of identifying factors involved in the pathogenic activation and cell proliferation observed in SIV infection, as the majority of genes with significant correlation were involved in cell-cycle progression. Additionally, the analysis identified CCR5 and TIM3, which have both been positively correlated to activation marker expression in HIV/SIV disease progression (12) provided independent validation of this approach.

#### *Lymph node biopsies and RNA extraction*

Axillary or inguinal lymph node biopsies that had been obtained from two SMs prior to infection; two SMs at the peak of viral replication at 14 dpi; and two SMs at 30 dpi as viral loads were decreasing to set point. We analyzed axillary or inguinal LNs from 4 RMs without SIV infection and LNs from four RMs infected intravaginally with  $2 \times 10^5$  TCID<sub>50</sub> of SIVmac239 and sacrificed at 14 days p.i., the peak of viral replication; these animals were from two cross-sectional studies described in (13). For lymph node (LN) biopsies, animals were anesthetized with Ketamine or Telazol; the skin over the axillary or inguinal region was clipped and surgically prepped. An incision was made over the LN, which was exposed by blunt dissection and excised over clamps. A portion of the lymph node biopsy for microarray analysis was snap frozen in liquid N<sub>2</sub>. All animals were housed and cared for at the Yerkes National Primate Research Center in Atlanta, Georgia in accordance with the regulations of the American Association of Accreditation of Laboratory Animal Care standards.

#### *Identifying genes differentially expressed in LNs in SMs and RMs*



RNA extractions, synthesis of biotin-labeled cRNA probes, microarray hybridization, and data analysis for LNs followed previously published procedures (14). Briefly, snap-frozen lymph node was homogenized in TRIzol. Total RNA was isolated and further purified. Double stranded cDNA and biotin-labeled cRNA probes were synthesized, column purified and fragmented. Fifteen micrograms of fragmented cRNA was hybridized to an Affymetrix GeneChip® Rhesus Macaque Genome Array. After hybridization, chips were washed, stained with streptavidin-phycoerythrin, and scanned with GeneChip Operating Software at the Biomedical Genomics Center at the University of Minnesota. Preparation of cRNA probes and microarray hybridizations were done in duplicate for each RNA sample. Cel. files were uploaded into the Expressionist program (Genedata, Pro version 5.1) and the expression level for each of the 47,000 transcripts in the arrays were analyzed using the RMA algorithm. The expression levels from duplicate microarrays of the same animal's RNA were correlated and averaged. Tests for differences between the before and after infection at various time points were conducted using the 2-sample Wilcoxon signed-rank test. Fold differences in the level of gene expression between after infection and before infection were calculated with the ratio of the means. After statistical analysis, data was sorted based on these transcript cutoffs: p-value of  $< 0.05$  and fold change  $\geq 2.0$ . Significantly changed genes and transcripts were uploaded into NetAffix Analysis Center (<http://www.affymetrix.com/analysis/index.affx>) to query gene ontology information and into Ingenuity Pathways Analysis (Ingenuity® Systems, [www.ingenuity.com](http://www.ingenuity.com)) for gene annotation and pathway analysis. Hierarchical clustering analysis side-by-side with whole blood data was carried out by using Partek Genomics Suite software (Partek, Inc.).

### *RNA Purification and Real-time PCR*

RNA was purified from whole blood using PAXgene as described in the Methods. RNA was purified from PBMCs using QIAGEN RNeasy columns, utilizing QIAshredder columns for homogenization and on-column DNase digestion, according to manufacturer's protocols (QIAGEN, Inc.). Quantitative real time PCR was performed on total RNA using an ABI-PRISM 7900HT Sequence Detection System and SYBR green PCR Master Mix (Applied Biosystems). 200-1000 ng of RNA was reverse transcribed in a 10-20  $\mu$ l reaction under the following conditions: 6.25  $\mu$ M dN6 random hexanucleotide primer (Applied Biosystems), 50 mM TrisHCl pH 8.3, 3 mM MgCl<sub>2</sub>, 75 mM KCl, 500  $\mu$ M of dATP, dGTP, dTTP, and dCTP, 10 mM DTT and 200 U SuperScript II RNase H- reverse transcriptase at 42 °C for 1 hr. Each qPCR reaction was performed in a volume of 10  $\mu$ l with 0.1  $\mu$ l of cDNA, primer pair and 5  $\mu$ l of SYBR green PCR MasterMix in ABI-PRISM optical 386 well plates. Each primer pair was tested with a logarithmic dilution of cDNA to generate a standard curve, which was used to calculate the starting quantity of target RNA. Primers specific for GAPDH mRNA was used as an endogenous standard to normalize samples. Fold-change was calculated by dividing the normalized post-infected sample quantity with the normalized pre-infected control quantity. (Primer sequences are in Supplementary Table S10).

### *IFN $\alpha$ Stimulation of PBMCs*

PBMCs purified from SM venous blood by density gradient centrifugation.  $5 \times 10^6$  PBMCs were cultured for 24 hrs in RPMI media supplemented with 10% heat inactivated fetal calf serum at 37 ° C and varying concentrations of IFN $\alpha$  diluted in PBS, or PBS

alone. PBMCs from uninfected SMs (Animal IDs: FEa1, FUa1, FJa1 FKa1) were treated with recombinant IFN $\alpha$ 2a (kindly provided by Francois Villinger, Emory University) at 5,000 IU/ml. SIV-infected SMs (FUv, FSs, FRs, FWv) were the same animals used for microarray analysis and were SIV+ for 3.5 yrs; PBMCs from these animals were stimulated overnight with Interferon $\alpha$ A/D, a recombinant interferon with demonstrated activity on macaques (Sigma-Aldrich, St. Louis, MO, USA) at indicated concentrations. After stimulation, PBMCs were centrifuged for 5 min at 1500 rpm, media was aspirated and cells were lysed in 650  $\mu$ l of RLT buffer with 1%  $\beta$ -mercaptoethanol. RNA was purified using RNeasy and qPCR for ISG expression performed as described above.

## References

1. Norgren, R.B. 2006. Expression arrays for macaque monkeys. *Transplant Rev (Orlando)*. **20**:115-120.
2. Duan, F., Spindel, E.R., Li, Y.H., and Norgren, R.B., Jr. 2007. Intercenter reliability and validity of the rhesus macaque GeneChip. *BMC Genomics*. **8**:61.
3. Huang da, W., Sherman, B.T., and Lempicki, R.A. 2009. Systematic and integrative analysis of large gene lists using DAVID bioinformatics resources. *Nat. Protoc.* **4**:44-57.
4. Dennis, G., Jr., et al. 2003. DAVID: Database for Annotation, Visualization, and Integrated Discovery. *Genome Biol.* **4**:P3.
5. Jacquelin, B., et al. 2009. Strong but Rapidly Controlled Interferon Type I Response in Nonpathogenic SIV Infection of African Green Monkeys. *J. Clin. Invest.* In press.
6. Bosinger, S.E., et al. 2004. Gene expression profiling of host response in models of acute HIV infection. *J. Immunol.* **173**:6858-6863.

7. Pandrea, I., et al. 2007. Paucity of CD4+CCR5+ T cells is a typical feature of natural SIV hosts. *Blood*. **109**:1069-1076.
8. Silvestri, G., et al. 2003. Nonpathogenic SIV infection of sooty mangabeys is characterized by limited bystander immunopathology despite chronic high-level viremia. *Immunity*. **18**:441-452.
9. Giorgi, J.V., et al. 2002. Predictive value of immunologic and virologic markers after long or short duration of HIV-1 infection. *J. Acquir. Immune Defic. Syndr.* **29**:346-355.
10. Hazenberg, M.D., et al. 2003. Persistent immune activation in HIV-1 infection is associated with progression to AIDS. *AIDS*. **17**:1881-1888.
11. Silvestri, G., et al. 2005. Divergent host responses during primary simian immunodeficiency virus SIVsm infection of natural sooty mangabey and nonnatural rhesus macaque hosts. *J. Virol.* **79**:4043-4054.
12. Jones, R.B., et al. 2008. Tim-3 expression defines a novel population of dysfunctional T cells with highly elevated frequencies in progressive HIV-1 infection. *J. Exp. Med.* **205**:2763-2779.
13. Miller, C.J., et al. 2005. Propagation and dissemination of infection after vaginal transmission of simian immunodeficiency virus. *J Virol.* **79**:9217-9227.
14. Li, Q., et al. 2004. Functional genomic analysis of the response of HIV-1-infected lymphatic tissue to antiretroviral therapy. *J. Infect. Dis.* **189**:572-582.

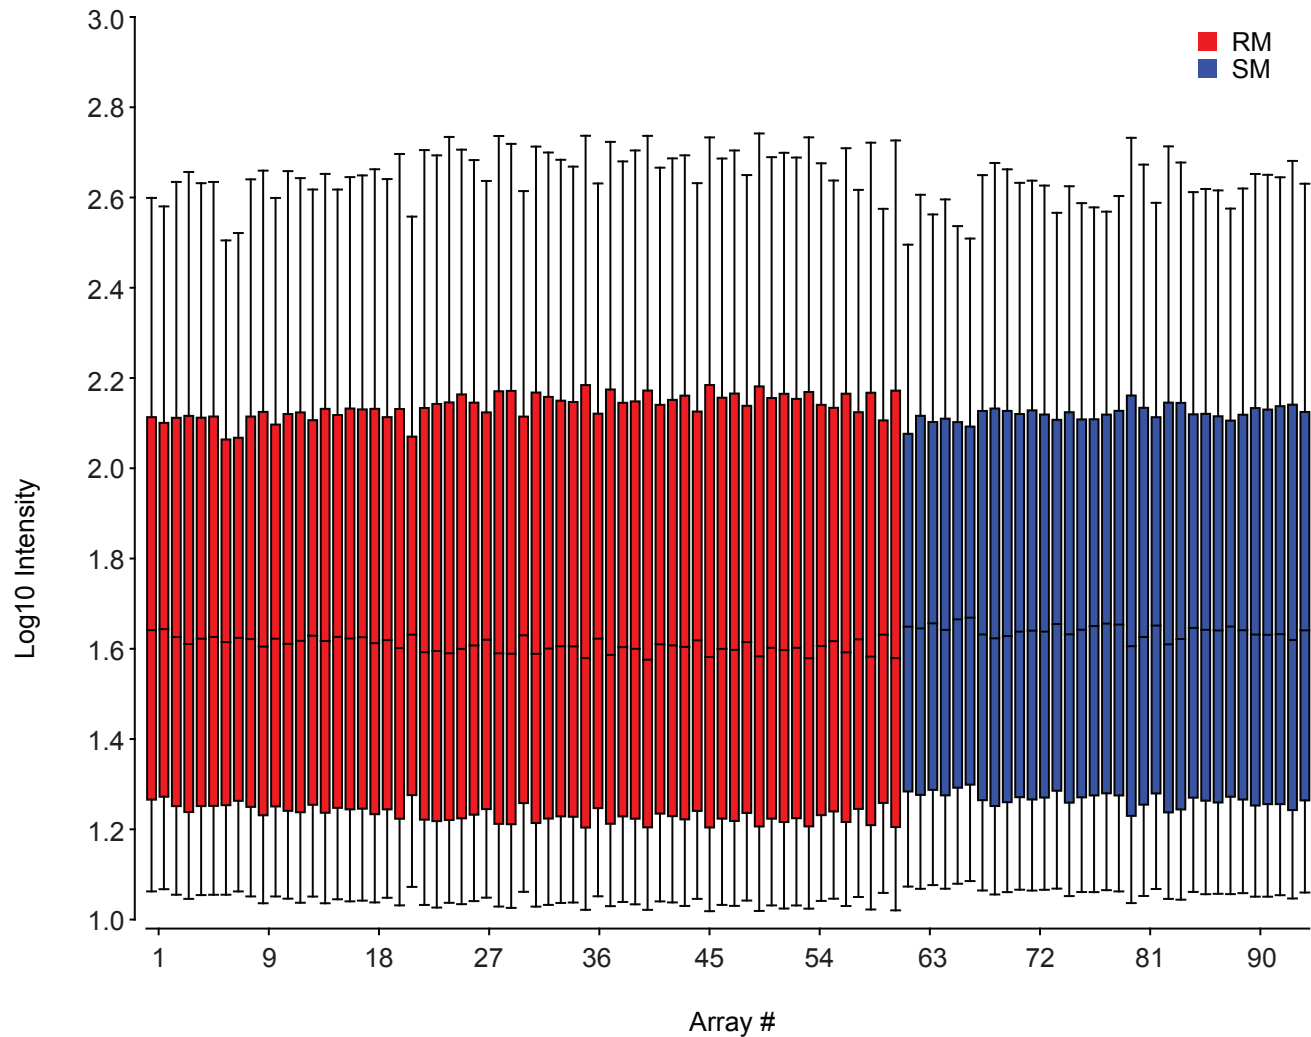

**Supplementary Figure S1: Probeset intensities of Affymetrix arrays hybridized with RNA from rhesus macaques and sooty mangabeys are equivalent.** Raw hybridization intensities from .CEL files were RMA normalized and log10 transformed. Box plots depict the median, 1st and 3rd quartiles of measured intensities over 52,865 probesets. Whiskers range to the top 90% and bottom 10% of the data range.

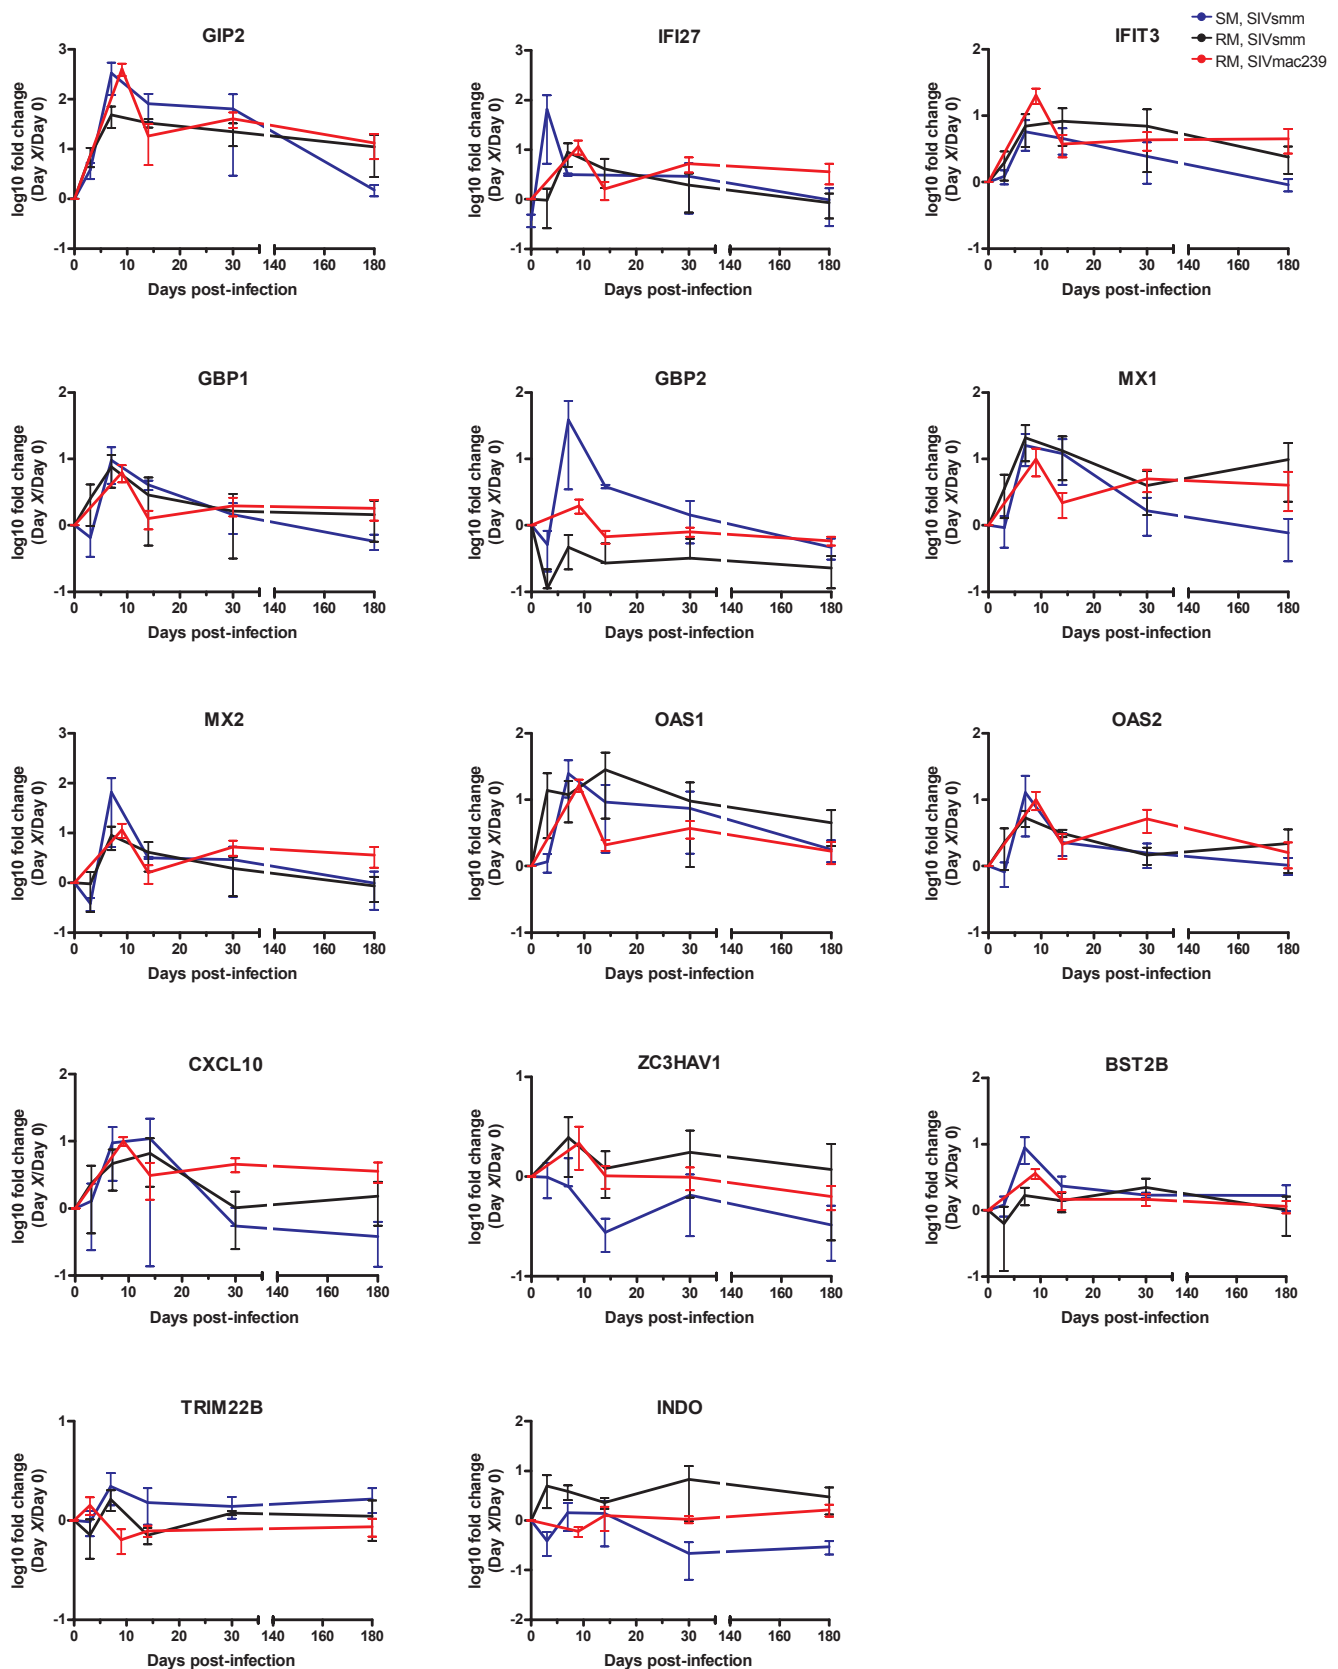

**Figure S2. Real-time PCR validation of microarray gene expression.** cDNA was generated from RNA samples used for microarray analysis. HUGO gene names are above respective line graphs, x-axis indicates time after infection, y-axis represents log<sub>10</sub> fold-change assessed by real-time PCR. Fold-changes are expressed as mean±SEM. Blue lines indicate SIV<sub>smm</sub>-infected SMs, black- SIV<sub>smm</sub>-infected RMs and red-SIV<sub>mac239</sub>-infected RMs. Primer sequences are indicated Supplementary Table S10.

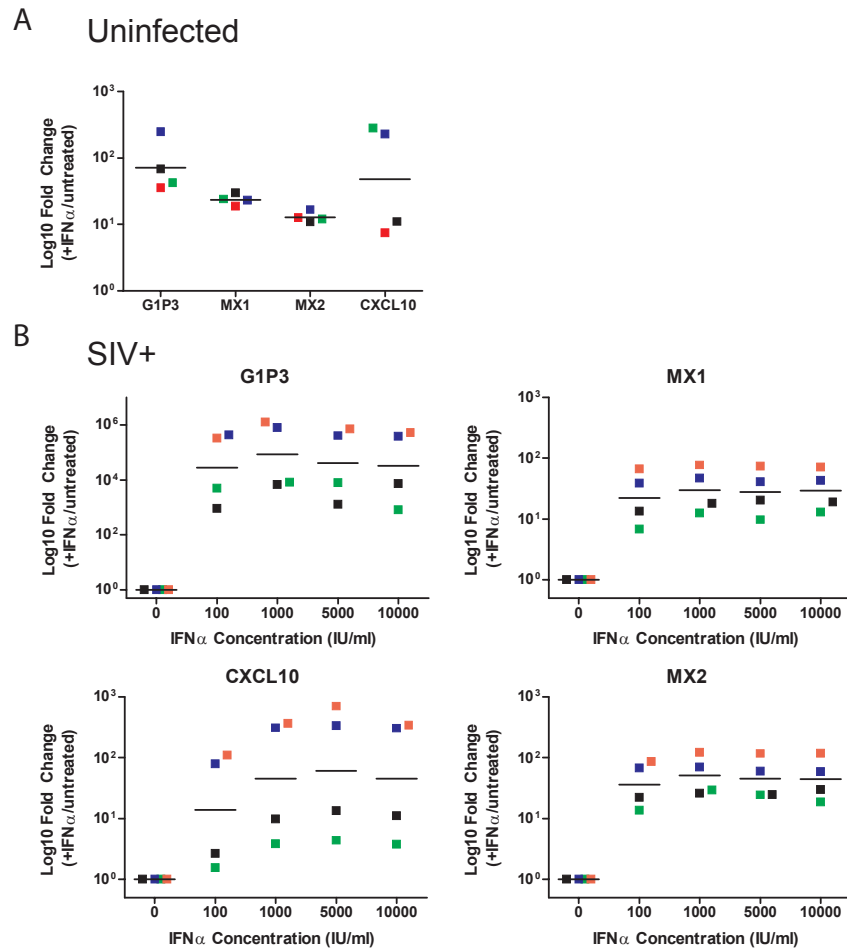

**Supplementary Figure S3. ISG induction in response to IFN $\alpha$  in SM PBMCs.** PBMCs from four uninfected (A) and four of the five SIVsmm-infected SMs used for the array analysis (B) were stimulated for 24 hr with IFN $\alpha$ . PBMCs from uninfected animals were treated with 5,000 IU/ml recombinant SM IFN $\alpha$ ; PBMCs from infected animals were treated for 24 hrs with recombinant consensus IFN $\alpha$  at the concentration indicated on the x axis. Coloured squares indicate individual animal, horizontal lines indicate the mean fold-change

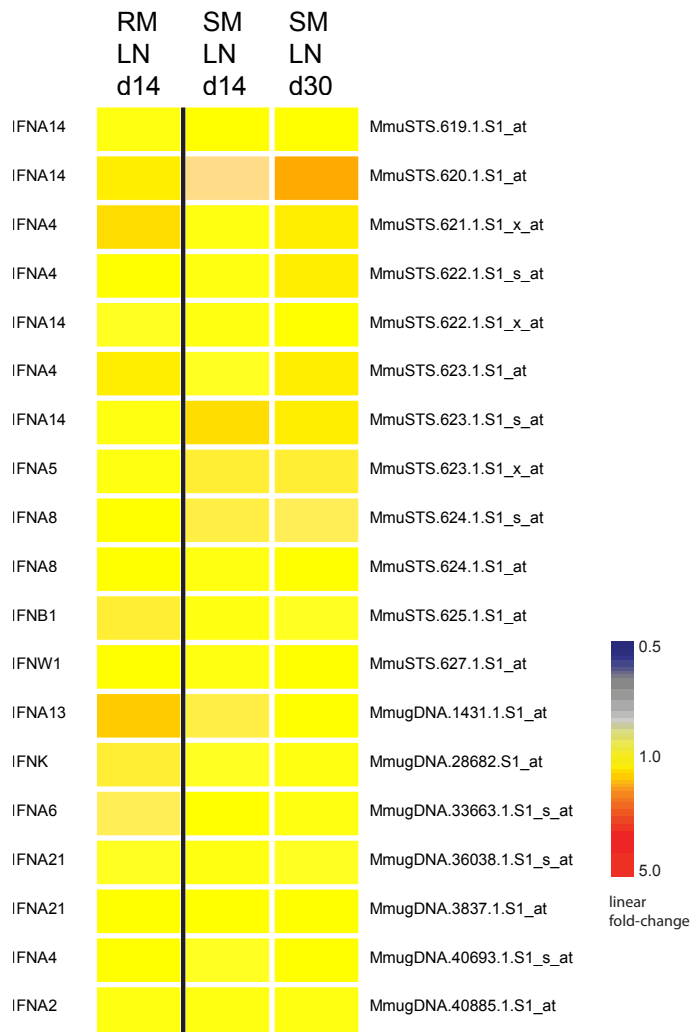

**Supplementary Figure S4. Heat map of Type I and II IFNs expressed in lymph nodes during SIV infection in SMs and RMs.** Gene symbol indicated at left, probeset ID indicated at right. Colour scale is indicated at right.



**Supplementary Table S1.** Global log<sub>10</sub> intensity statistics of *Cercocebus atys* and *Macaca mulatta* total RNA hybridized on Affymetrix GeneChip Rhesus Macaque Genome Arrays.

|                                                   | <i>Cercocebus atys</i> | <i>Macaca mulatta</i> | <i>All samples</i> |
|---------------------------------------------------|------------------------|-----------------------|--------------------|
| Animals (n)                                       | 5                      | 12                    | 17                 |
| # arrays                                          | 33                     | 61                    | 94                 |
| Log <sub>10</sub> Probeset Intensity <sup>†</sup> |                        |                       |                    |
| Mean                                              | 1.76                   | 1.75                  | 1.75               |
| Median                                            | 1.65                   | 1.62                  | 1.63               |
| Range                                             | 0.77-4.50              | 0.75-4.51             | 0.75-4.51          |
| Std. Dev.                                         | 0.61                   | 0.64                  | 0.63               |

<sup>†</sup> Intensity statistics determined using 52,024 probesets; probesets representing control, reporter or viral sequences were excluded from analysis.

Supplementary Table S2. In silico analysis of Rhesus GeneChip probesets with known SM cDNAs.

Table with columns: GenBank Accession, GenBank Definition, Affymetrix Probeset ID, Probeset Gene Symbol, # probes, and a grid of values for 0-5 mismatches and a >5 or indel category. The table lists numerous gene probesets and their corresponding cDNA matches.

\* \* indicates matched SM cDNA to multiple probesets; \* denotes the cDNA above.

**Supplementary Table S3.** Hemoglobin RNA blocking Peptide-Nucleic Acid (PNA) oligonucleotide sequences.

| <b>Name</b> | <b>Sequence<sup>†</sup></b>   | <b>Concentration (nM)</b> | <b>Target</b> |
|-------------|-------------------------------|---------------------------|---------------|
| huPNA1      | 5'-Ac-TAA CGG TAT TTG GAG-3'  | 290                       | HBA           |
| rhPNA2      | 5'-Ac-GTA GTT GGA CTT TGG-3'  | 580                       | HBB           |
| huPNA3      | 5'-Ac-GCC CTT CAT AAT ATC-3'  | 580                       | HBB           |
| rhPNA4      | 5'-Ac- ATC CAG ATC CTC AAG-3' | 580                       | HBB           |
| simconPNA   | 5'Ac- TGA GCT TAG TGG TAC-3'  | 580                       | HBB           |

<sup>†</sup> Ac - Acetylated

**Supplemental Table S4** 428 probesets detected as differential after SIVsm infection of SMs in RNA derived from total blood. The Affymetrix Gene Symbol refers to the annotation of the Affymetrix Rhesus Genome Array provided by Affymetrix, Inc. (v.27) which is based on the most recent build of the Unigen Rhesus Macaque genome (Build #13). The Corrected Gene Symbol column refers to updates to the annotation by cross-referencing ProbeSet IDs with human orthologues using the DAVID database (<http://david.abcc.ncifcrf.gov/list.jsp>). The D3/D0 columns detect the linear ratio of overexpressed (red >2-fold) and underexpressed (green <-2-fold) genes. Gene Description were obtained from the DAVID database based on human annotation.

| Affymetrix ProbeSet ID  | Affymetrix Gene Symbol | Corrected Gene Symbol | ANOVA (time) p-value | D3/D0 | D7/D0 | D10/D0 | D14/D0 | D30/D0 | D180/D0 | Gene Description                                                                   |
|-------------------------|------------------------|-----------------------|----------------------|-------|-------|--------|--------|--------|---------|------------------------------------------------------------------------------------|
| MmugDNA.41706.1.S1_at   | ---                    | RSAD2                 | 1.07E-12             | 1.71  | 91.83 | 74.94  | 29.27  | 5.82   | 1.30    | radical s-adenosyl methionine domain containing 2                                  |
| MmuSTS.1497.1.S1_at     | ---                    | RSAD2                 | 5.34E-09             | 1.74  | 49.95 | 49.42  | 17.85  | 4.93   | 1.32    | radical s-adenosyl methionine domain containing 2                                  |
| MmuSTS.4748.1.S1_at     | ---                    | USP18                 | 8.36E-16             | 1.61  | 50.45 | 44.75  | 9.22   | 3.54   | 1.30    | ubiquitin specific peptidase 18                                                    |
| MmuSTS.1612.1.S1_at     | LOC698943              | OASL                  | 1.87E-10             | 1.44  | 27.76 | 35.26  | 6.49   | 3.10   | 1.09    | 2'-5'-oligoadenylate synthetase-like                                               |
| MmugDNA.21386.1.S1_at   | LOC708602              | CMPK2                 | 1.58E-08             | 1.46  | 53.66 | 32.50  | 10.57  | 3.38   | 1.39    | cytidine monophosphate (UMP-CMP) kinase 2, mitochondrial                           |
| MmugDNA.17118.1.S1_at   | LOC700141              | ISG15                 | 2.44E-08             | 1.23  | 28.51 | 30.54  | 5.19   | 2.70   | 1.21    | interferon, alpha-inducible protein (clone fl-15k)                                 |
| MmugDNA.38910.1.S1_at   | AMBP                   | HERC5                 | 6.07E-10             | 1.92  | 30.08 | 29.87  | 13.20  | 6.55   | 1.18    | hect domain and rhd 5                                                              |
| MmuSTS.3006.1.S1_at     | MX1                    | MX1                   | 8.61E-09             | 1.90  | 32.27 | 27.07  | 7.94   | 5.03   | 1.87    | myxovirus (influenza virus) resistance 1, interferon-inducible protein p78 (mouse) |
| MmugDNA.12892.1.S1_at   | LOC707854              | IFI44                 | 1.93E-08             | 1.82  | 45.84 | 24.30  | 18.22  | 5.86   | 1.43    | interferon-induced protein 44                                                      |
| MmuSTS.4655.1.S1_at     | OAS1                   | OAS1                  | 2.74E-14             | 1.25  | 18.11 | 23.84  | 5.52   | 2.29   | 1.35    | 2'-5'-oligoadenylate synthetase 1, 40/46kda                                        |
| MmugDNA.19594.1.S1_at   | LOC695344              | IFIT3                 | 9.14E-13             | 1.67  | 27.27 | 20.60  | 6.68   | 2.93   | 1.07    | interferon-induced protein with tetratricopeptide repeats 3                        |
| MmuSTS.3682.1.S1_x_at   | LOC707854              | IFI44                 | 1.51E-07             | 1.89  | 37.34 | 18.85  | 17.04  | 5.28   | 1.27    | interferon-induced protein 44                                                      |
| MmugDNA.27193.1.S1_at   | LOC697657              | FLJ20035              | 2.00E-08             | 1.73  | 28.90 | 18.47  | 9.16   | 2.98   | 1.14    | hypothetical protein fl10787                                                       |
| MmuSTS.1893.1.S1_s_at   | ---                    | CXCL10                | 2.78E-10             | 1.24  | 16.60 | 17.93  | 4.32   | 1.36   | 1.15    | chemokine (c-x-c motif) ligand 10                                                  |
| MmuSTS.1579.1.S1_at     | IFIT1                  | IFIT1                 | 7.67E-07             | 1.06  | 17.77 | 17.45  | 5.83   | 2.61   | -1.43   | interferon-induced protein with tetratricopeptide repeats 1                        |
| MmugDNA.11735.1.S1_at   | ---                    | DDX58                 | 2.61E-10             | 1.61  | 18.95 | 16.99  | 5.45   | 2.99   | 1.16    | dead (asp-glu-ala-asp) box polypeptide 58                                          |
| MmuSTS.4428.1.S1_at     | LOC702381              | IFI6                  | 5.65E-11             | 1.40  | 10.70 | 16.84  | 5.93   | 3.88   | 1.63    | interferon, alpha-inducible protein (clone fl-6-16)                                |
| MmuSTS.713.1.S1_at      | LOC697698              | TTL6                  | 1.18E-09             | 1.55  | 18.81 | 15.08  | 5.93   | 2.84   | 1.27    | Similar to tubulin tyrosine ligase-like family, member 6                           |
| MmugDNA.5747.1.S1_at    | IFIT2                  | IFIT2                 | 6.82E-12             | 1.64  | 23.93 | 14.42  | 8.01   | 3.39   | -1.00   | Similar to tubulin tyrosine ligase-like family, member 6                           |
| MmugDNA.22912.1.S1_s_at | GBP1                   | GBP1                  | 4.24E-08             | 1.78  | 14.10 | 14.41  | 5.19   | 2.32   | 1.10    | guanylate binding protein 1, interferon-inducible, 67kda                           |
| MmugDNA.36433.1.S1_at   | LOC694684              | GBP2                  | 1.75E-09             | 1.32  | 12.48 | 14.37  | 2.76   | 1.96   | 1.11    | guanylate binding protein 2, interferon-inducible                                  |
| MmugDNA.6512.1.S1_at    | LOC699458              | LOC26010              | 9.66E-07             | 1.29  | 9.40  | 13.36  | 3.41   | 1.56   | 1.56    | dna polymerase-transactivated protein 6                                            |
| MmugDNA.20819.1.S1_at   | LOC712342              | OAS3                  | 3.30E-10             | 1.31  | 15.14 | 13.24  | 3.41   | 2.20   | 1.24    | 2'-5'-oligoadenylate synthetase 3, 100kda                                          |
| MmugDNA.35740.1.S1_at   | IFIT2                  | IFIT2                 | 6.40E-10             | 1.10  | 17.31 | 12.52  | 4.61   | 2.79   | -1.49   | interferon-induced protein with tetratricopeptide repeats 2                        |
| MmuSTS.713.1.S1_x_at    | LOC697698              | TTL6                  | 1.43E-10             | 1.35  | 14.04 | 12.10  | 3.95   | 2.45   | 1.08    | Similar to tubulin tyrosine ligase-like family, member 6                           |
| MmugDNA.30921.1.S1_at   | LOC705525              | HERC6                 | 1.72E-12             | 1.26  | 10.93 | 11.23  | 3.71   | 1.95   | 1.12    | Similar to tubulin tyrosine ligase-like family, member 6                           |
| MmuSTS.2397.1.S1_s_at   | LOC694684              | GBP2                  | 2.83E-08             | 1.22  | 8.23  | 13.05  | 2.57   | 1.78   | 1.10    | guanylate binding protein 2, interferon-inducible                                  |
| MmugDNA.8486.1.S1_at    | LOC712401              | OAS2                  | 3.10E-09             | 1.34  | 15.72 | 11.01  | 3.30   | 1.84   | 1.25    | 2'-5'-oligoadenylate synthetase 2, 69/71kda                                        |
| MmugDNA.20634.1.S1_at   | LOC697698              | DXH58                 | 8.96E-11             | 1.22  | 13.08 | 10.32  | 3.04   | 2.18   | 1.17    | likely ortholog of mouse d11gp2                                                    |
| MmugDNA.25674.1.S1_at   | LOC699580              | RCTD14                | 5.11E-09             | 1.22  | 5.12  | 10.29  | 2.50   | 1.40   | 1.34    | potassium channel tetramerisation domain containing 14                             |
| MmugDNA.10315.1.S1_at   | GBP1                   | GBP1                  | 1.02E-09             | 1.54  | 10.93 | 10.11  | 5.81   | 2.00   | 1.25    | guanylate binding protein 1, interferon-inducible, 67kda                           |
| MmugDNA.208.1.S1_at     | ---                    | SECTM1                | 6.06E-08             | 1.26  | 4.84  | 9.52   | 2.84   | 1.74   | 1.12    | secreted and transmembrane 1                                                       |
| MmugDNA.32616.1.S1_at   | LOC713425              | XAF1                  | 1.10E-07             | 1.14  | 6.38  | 9.52   | 2.93   | 1.95   | 1.20    | xiap associated factor-1                                                           |
| Mmu.10088.2.S1_at       | MX2                    | MX2                   | 6.48E-07             | 1.32  | 11.46 | 9.28   | 2.83   | 2.10   | 1.24    | myxovirus (influenza virus) resistance 2 (mouse)                                   |
| MmuSTS.1377.1.S1_at     | LOC695971              | BCL2L14               | 9.65E-10             | 1.15  | 5.26  | 9.11   | 2.28   | 1.21   | 1.28    | bcl2-like 14 (apoptosis facilitator)                                               |
| MmugDNA.1672.1.S1_at    | LOC694699              | TNFAIP6               | 2.58E-09             | -1.22 | 4.74  | 6.65   | 2.19   | 1.16   | 2.44    | tumor necrosis factor, alpha-induced protein 6                                     |
| Mmu.3779.1.S1_at        | LOC695344              | IFIT3                 | 6.47E-10             | -1.10 | 7.23  | 8.30   | 2.06   | 1.57   | -1.31   | interferon-induced protein with tetratricopeptide repeats 3                        |
| MmuSTS.2737.1.S1_at     | ADAMDEC1               | ADAMDEC1              | 2.11E-06             | 1.56  | 2.56  | 8.26   | 4.20   | 1.73   | 1.10    | adam-like, decysin 1                                                               |
| MmugDNA.29625.1.S1_at   | LOC699578              | IRF7                  | 5.15E-09             | 1.14  | 5.10  | 8.04   | 2.41   | 1.84   | 1.07    | interferon regulatory factor 7                                                     |
| MmugDNA.33882.1.S1_at   | ---                    | TRIM14                | 1.82E-08             | 1.51  | 7.39  | 7.99   | 3.93   | 2.27   | 1.34    | tripartite motif-containing 14                                                     |
| Mmu.865.1.S1_at         | OAS1                   | OAS1                  | 5.58E-11             | -1.05 | 4.98  | 7.91   | 1.80   | 1.34   | 1.04    | 2'-5'-oligoadenylate synthetase 1, 40/46kda                                        |
| MmugDNA.8521.1.S1_at    | GOT2                   | GOT2                  | 2.31E-09             | 1.01  | 6.35  | 7.79   | 2.69   | 1.84   | -1.09   | glutamic-oxaloacetic transaminase 2, mitochondrial (aspartate aminotransferase 2)  |
| MmuSTS.1927.1.S1_at     | MX2                    | MX2                   | 7.21E-08             | 1.32  | 9.07  | 7.59   | 3.62   | 2.16   | 1.21    | myxovirus (influenza virus) resistance 2 (mouse)                                   |
| MmugDNA.20819.1.S1_s_at | LOC712342              | OAS3                  | 1.01E-10             | 1.09  | 6.32  | 7.54   | 2.76   | 1.92   | 1.06    | 2'-5'-oligoadenylate synthetase 3, 100kda                                          |
| MmugDNA.7695.1.S1_at    | ---                    | IFIT5                 | 5.13E-11             | 1.14  | 7.15  | 7.34   | 2.93   | 1.77   | -1.08   | interferon-induced protein with tetratricopeptide repeats 5                        |
| MmugDNA.31670.1.S1_at   | PTPRA                  | FAM70A                | 1.77E-08             | 1.14  | 13.45 | 7.26   | 2.75   | 1.39   | 1.30    | family with sequence similarity 70, member a                                       |
| MmugDNA.22278.1.S1_at   | ---                    | DDX58                 | 5.17E-10             | 1.12  | 7.24  | 7.19   | 2.59   | 1.63   | 1.02    | dead (asp-glu-ala-asp) box polypeptide 58                                          |
| MmugDNA.19136.1.S1_at   | ---                    | CCDC75                | 2.60E-06             | 1.69  | 9.42  | 7.08   | 3.62   | 2.21   | 1.16    | coiled-coil domain containing 75                                                   |
| MmuSTS.4660.1.S1_at     | LOC694699              | TNFAIP6               | 9.21E-07             | -1.05 | 4.08  | 7.06   | 1.89   | 1.04   | 2.21    | tumor necrosis factor, alpha-induced protein 6                                     |
| MmugDNA.40648.1.S1_at   | LOC707769              | JUP                   | 1.59E-08             | -1.03 | 3.81  | 7.03   | 1.29   | 1.04   | 1.05    | junction plakoglobin                                                               |
| MmuSTS.1778.1.S1_at     | SCIN                   | SCIN                  | 1.70E-08             | 1.19  | 3.30  | 6.94   | 1.40   | 1.20   | -1.12   | scinderin                                                                          |
| MmuSTS.23571.1.S1_at    | ---                    | EPSTI1                | 2.95E-07             | 1.24  | 6.52  | 8.79   | 2.30   | 2.12   | 1.09    | epithelial stromal interaction 1 (breast)                                          |
| MmugDNA.33861.1.S1_at   | LOC713425              | XAF1                  | 2.81E-07             | 1.13  | 7.59  | 6.70   | 3.20   | 1.97   | 1.08    | xiap associated factor-1                                                           |
| MmugDNA.15476.1.S1_at   | LOC700208              | EPSTI1                | 2.94E-08             | 1.30  | 6.90  | 6.66   | 2.71   | 1.90   | 1.16    | epithelial stromal interaction 1 (breast)                                          |
| MmugDNA.24962.1.S1_at   | LOC695344              | IFIT3                 | 5.35E-12             | 1.49  | 6.82  | 6.30   | 4.76   | 2.94   | -1.01   | interferon-induced protein with tetratricopeptide repeats 3                        |
| MmugDNA.16654.1.S1_at   | ---                    | GBP2                  | 2.47E-07             | 1.15  | 5.82  | 6.17   | 2.10   | 1.18   | 1.03    | guanylate binding protein 2, interferon-inducible                                  |
| MmugDNA.8893.1.S1_at    | LOC715369              | CORO2A                | 1.33E-06             | 1.12  | 3.48  | 6.16   | 1.40   | 1.38   | 1.29    | coronin, actin binding protein, 2a                                                 |
| Mmu.11584.1.S1_at       | LOC719092              | BST2                  | 4.56E-07             | 1.27  | 4.31  | 8.14   | 2.43   | 1.72   | 1.07    | bone marrow stromal cell antigen 2                                                 |
| MmugDNA.19189.1.S1_at   | DDX58                  | DDX58                 | 3.41E-08             | -1.11 | 3.75  | 6.09   | 1.29   | 1.02   | -1.10   | dead (asp-glu-ala-asp) box polypeptide 58                                          |
| MmuSTS.1439.1.S1_at     | LGALS3BP               | LGALS3BP              | 6.01E-08             | 1.06  | 3.74  | 5.96   | 1.55   | 1.37   | 1.13    | lectin, galactoside-binding, soluble, 3 binding protein                            |
| MmugDNA.36297.1.S1_at   | IFIH1                  | IFIH1                 | 2.41E-08             | 1.58  | 7.95  | 5.76   | 3.17   | 1.81   | -1.03   | interferon induced with helicase c domain 1                                        |
| Mmu.12633.1.S1_at       | LOC715591              | PARP14                | 6.11E-08             | 1.38  | 5.86  | 5.36   | 2.92   | 1.56   | 1.04    | poly (adp-ribose) polymerase family, member 14                                     |
| MmugDNA.23544.1.S1_s_at | LOC694225              | FCGR2C                | 6.42E-11             | 1.26  | 3.29  | 5.35   | 1.53   | 1.40   | -1.10   | fc fragment of igg, low affinity iic, receptor for (cd32)                          |
| MmugDNA.13092.1.S1_at   | ---                    | SHROOM4               | 1.20E-05             | 1.06  | 4.19  | 5.26   | 1.99   | 1.24   | 1.00    | ksia1202 protein                                                                   |
| MmugDNA.20321.1.S1_at   | LOC719142              | HIRA                  | 0.00536686           | 1.51  | 3.89  | 5.18   | 1.53   | 1.75   | 1.46    | hir histone cell cycle regulation defective homolog a (s. cerevisiae)              |
| Mmu.11961.1.S1_x_at     | GBP1                   | GBP1                  | 0.000491887          | 1.02  | 3.89  | 5.08   | 2.89   | 1.17   | -1.29   | guanylate binding protein 1, interferon-inducible, 67kda                           |
| MmugDNA.27480.1.S1_s_at | LOC710375              | LGALS8                | 6.46E-06             | 1.04  | 5.90  | 5.01   | 1.76   | 1.38   | -1.11   | lectin, galactoside-binding, soluble, 8 (galectin 8)                               |
| MmugDNA.8112.1.S1_at    | ---                    | RNF213                | 5.92E-07             | 1.37  | 5.13  | 4.99   | 2.28   | 1.68   | 1.14    | chromosome 17 open reading frame 27                                                |
| Mmu.13018.2.S1_a_at     | TRIM5                  | TRIM5                 | 3.36E-07             | -1.04 | 2.65  | 4.98   | 1.25   | 1.25   | -1.30   | tripartite motif-containing 5                                                      |
| MmugDNA.28694.1.S1_s_at | ---                    | ZCCHC2                | 8.95E-07             | 1.19  | 6.31  | 4.97   | 2.94   | 1.83   | -1.11   | zinc finger, cchc domain containing 2                                              |
| Mmu.11960.1.S1_at       | GBP1                   | GBP1                  | 0.000185398          | 1.00  | 3.01  | 4.91   | 1.55   | 1.39   | 1.01    | guanylate binding protein 1, interferon-inducible, 67kda                           |
| MmugDNA.35760.1.S1_at   | LOC708404              | RTP4                  | 1.37E-06             | 1.15  | 4.41  | 4.78   | 2.26   | 1.42   | -1.00   | receptor transporter protein 4                                                     |
| MmugDNA.29993.1.S1_s_at | LOC694225              | FCGR2B                | 8.84E-10             | 1.33  | 3.31  | 4.78   | 1.67   | 1.41   | 1.10    | fc fragment of igg, low affinity iib, receptor (cd32)                              |
| MmugDNA.5999.1.S1_at    | ---                    | ZCCHC2                | 9.24E-08             | 1.30  | 4.01  | 4.73   | 1.68   | 1.86   | 1.06    | zinc finger, cchc domain containing 2                                              |
| MmugDNA.32611.1.S1_s_at | LOC715462              | SLFN5                 | 0.000110636          | 1.14  | 4.62  | 4.63   | 1.26   | 1.44   | -1.18   | likely ortholog of mouse schlafen 5                                                |
| MmugDNA.14170.1.S1_at   | ---                    | ZCCHC2                | 5.52E-08             | -1.02 | 3.43  | 4.62   | 1.58   | 1.55   | -1.25   | zinc finger, cchc domain containing 2                                              |
| MmugDNA.19098.1.S1_at   | ---                    | LOC100130123          | 5.60E-07             | 1.19  | 3.14  | 4.59   | 1.51   | 1.39   | 1.15    | ---                                                                                |
| MmugDNA.3353.1.S1_at    | LOC700215              | ---                   | 1.34E-05             | 1.05  | 2.53  | 4.56   | 1.27   | 1.13   | -1.23   | similar to NmrA-like family domain containing 1                                    |
| MmugDNA.8379.1.S1_at    | LOC715462              | SLFN6                 | 0.000130493          | 1.04  | 4.98  | 4.51   | 1.43   | 1.24   | -1.22   | similar to Heat shock 70 kDa protein 1 (HSP70.1) (HSP70-1/HSP70-2)                 |
| MmuSTS.2042.1.S1_at     | ---                    | PML                   | 3.17E-10             | 1.14  | 3.83  | 4.48   | 1.41   | 1.35   | 1.24    | promyelocytic leukemia                                                             |
| MmugDNA.17877.1.S1_s_at | ---                    | PML                   | 3.19E-09             | 1.11  | 3.69  | 4.40   | 1.41   | 1.16   | 1.12    | promyelocytic leukemia                                                             |
| MmuSTS.603.1.S1_at      | LOC720054              | HSPA1B                | 0.000441505          | 1.11  | 3.30  | 4.39   | 2.36   | -1.19  | -1.69   | heat shock 70kda protein 1a                                                        |
| MmugDNA.31005.1.S1_at   | ---                    | NANS                  | 1.10E-06             | 1.11  | 3.50  | 4.32   | 1.87   | 1.62   | 1.01    | n-acetylneuraminic acid synthase (sialic acid synthase)                            |
| MmugDNA.13932.1.S1_at   | ---                    | RNF213                | 1.54E-08             | 1.02  | 3.98  | 4.28   | 1.49   | 1.37   | -1.11   | chromosome 17 open reading frame 27                                                |
| MmugDNA.23425.1.S1_at   | IL1RN                  | IL1RN                 | 3.26E-06             | 1.09  | 2.01  | 4.28   | -1.08  | -1.36  | 1.01    | interleukin 1 receptor antagonist                                                  |
| MmuSTS.3702.1.S1_at     | ---                    | EIF2AK2               | 1.48E-08             | -1.10 | 2.83  | 4.21   | 1.55   | 1.34   | -1.08   | eukaryotic translation initiation factor 2                                         |

| Affymetrix Probeset ID  | Affymetrix Gene Symbol | Corrected Gene Symbol | ANOVA (time) p-value | D3/Dc | D7/Dc | D10/Dc | D14/Dc | D30/Dc | D180/Dc | Gene Description                                                    |
|-------------------------|------------------------|-----------------------|----------------------|-------|-------|--------|--------|--------|---------|---------------------------------------------------------------------|
| MmugDNA.34622.1.S1_at   | PARP9                  | PARP9                 | 9.32E-09             | 1.41  | 5.39  | 4.16   | 2.30   | 1.74   | 1.16    | poly (adp-ribose) polymerase family, member 9                       |
| MmugDNA.20952.1.S1_at   | DDX6L                  | DDX6L                 | 1.21E-08             | -1.02 | 3.59  | 4.11   | 1.11   | -1.07  | -1.16   | DEAD (Asp-Glu-Ala-Asp) box polypeptide 60-like                      |
| MmugDNA.32611.1.S1_at   | LOC715462              | SLFN5                 | 0.000120016          | 1.19  | 3.61  | 4.08   | 1.42   | 1.46   | -1.06   | likely ortholog of mouse schlafen 5                                 |
| Mmu.11960.1.S1_x_at     | GBP1                   | GBP1                  | 3.66E-05             | -1.05 | 2.68  | 4.08   | 1.33   | 1.05   | 1.06    | guanylate binding protein 1, interferon-inducible, 67kda            |
| MmuSTS.602.1.S1_at      | LOC715638              | HSPA1A                | 5.27E-05             | 1.02  | 2.89  | 4.05   | 1.79   | 1.08   | -1.16   | similar to Heat shock 70 kDa protein 1 (HSP70.1) (HSP70-1/HSP70-2)  |
| MmugDNA.23497.1.S1_at   | STAT1                  | STAT1                 | 1.19E-06             | 1.39  | 3.49  | 4.02   | 2.65   | 1.64   | 1.20    | signal transducer and activator of transcription 1, 91kda           |
| MmugDNA.28694.1.S1_at   | ---                    | ZCCHC2                | 5.86E-06             | 1.15  | 3.10  | 4.01   | 1.69   | 1.43   | -1.07   | zinc finger, cchc domain containing 2                               |
| MmuSTS.1082.1.S1_at     | LOC712674              | PDE8B                 | 6.86E-07             | 1.33  | 4.02  | 4.00   | 2.52   | 1.78   | 1.22    | phosphodiesterase 8b                                                |
| MmugDNA.15286.1.S1_at   | LOC715591              | PARP14                | 4.50E-09             | 1.23  | 5.00  | 4.00   | 2.22   | 1.53   | -1.08   | poly (adp-ribose) polymerase family, member 14                      |
| MmugDNA.23196.1.S1_at   | ---                    | STAT1                 | 1.31E-07             | 1.20  | 3.41  | 3.99   | 1.48   | 1.41   | 1.13    | signal transducer and activator of transcription 1, 91kda           |
| MmuSTS.1513.1.S1_at     | IFI35                  | IFI35                 | 5.74E-06             | 1.28  | 4.36  | 3.96   | 2.16   | 1.29   | 1.02    | interferon-induced protein 35                                       |
| MmugDNA.19523.1.S1_at   | CD164                  | CD164                 | 0.000315465          | 1.21  | 2.32  | 3.93   | 1.84   | 1.51   | -1.01   | cd164 antigen, sialomucin                                           |
| MmuSTS.4666.1.S1_at     | TNFSF10                | TNFSF10               | 7.77E-07             | 1.17  | 4.21  | 3.92   | 1.50   | -1.01  | 1.36    | tumor necrosis factor (ligand) superfamily, member 10               |
| MmugDNA.43291.1.S1_at   | LOC712401              | OAS2                  | 9.79E-09             | -1.03 | 2.62  | 3.90   | 1.22   | -1.02  | -1.05   | 2'-5'-oligoadenylate synthetase 2, 69/71kda                         |
| MmugDNA.19588.1.S1_at   | ---                    | TIFA                  | 1.18E-07             | 1.32  | 2.00  | 3.89   | 1.94   | -1.21  | -1.49   | raf1-interacting protein with a forkhead-associated domain          |
| MmugDNA.21105.1.S1_at   | LOC721995              | LIG1                  | 0.000371967          | 1.24  | 4.33  | 3.97   | 2.30   | 1.84   | 1.16    | ligase 1, dna, atp-dependent                                        |
| Mmu.13018.1.S1_at       | TRIM5                  | TRIM5                 | 5.75E-05             | 1.25  | 3.17  | 3.85   | 1.52   | 1.30   | 1.11    | tripartite motif-containing 5                                       |
| MmuAfx.10.1.A1_x_at     | ---                    | ---                   | 0.000163111          | -1.20 | 3.92  | 3.83   | 2.83   | 2.19   | -1.72   | ---                                                                 |
| MmugDNA.19278.1.S1_at   | LOC693527              | PHACTR2               | 3.63E-07             | 1.21  | 3.82  | 3.82   | 1.77   | 1.55   | 1.11    | phosphatase and actin regulator 2                                   |
| MmugDNA.4678.1.S1_at    | ---                    | TREX1                 | 7.39E-07             | 1.15  | 2.78  | 3.81   | 1.26   | 1.27   | 1.21    | three prime repair exonuclease 1                                    |
| MmuSTS.2890.1.S1_at     | ---                    | TRIM14                | 5.15E-05             | 1.05  | 3.73  | 3.81   | 2.79   | 2.01   | -1.24   | tripartite motif-containing 14                                      |
| MmuSTS.1560.1.S1_at     | ---                    | MGC20410              | 9.85E-08             | -1.01 | 1.91  | 3.71   | 1.48   | 1.08   | 1.19    | ---                                                                 |
| MmugDNA.16432.1.S1_at   | DHX8                   | PRIC2B5               | 3.07E-07             | -1.00 | 2.68  | 3.69   | 1.39   | 1.20   | 1.10    | peroxisomal proliferator-activated receptor interacting complex 2B5 |
| MmunewRS.936.1.S1_at    | MmugDNA.19523.1.S1_at  | GBP6                  | 9.87E-08             | 1.10  | 3.72  | 3.69   | 2.06   | 1.30   | -1.17   | guanylate binding protein family, member 6                          |
| Mmu.7639.1.S1_at        | STAT1                  | STAT1                 | 9.85E-08             | 1.54  | 4.54  | 3.66   | 2.15   | 1.35   | 1.26    | signal transducer and activator of transcription 1, 91kda           |
| MmugDNA.34026.1.S1_at   | LOC718510              | PLA2G4C               | 9.94E-05             | 1.02  | 2.09  | 3.68   | 1.14   | 1.12   | 1.07    | phospholipase a2, group iv (cytosolic, calcium-independent)         |
| MmugDNA.9603.1.S1_at    | ---                    | PML                   | 3.93E-06             | 1.33  | 4.21  | 3.67   | 1.80   | 1.47   | 1.21    | promyelocytic leukemia                                              |
| MmunewRS.201.S1_at      | LOC719253              | IFI16                 | 6.72E-05             | 1.24  | 3.67  | 3.66   | 1.63   | 1.45   | -1.09   | interferon, gamma-inducible protein 16                              |
| MmuSTS.1789.1.S1_at     | LOC720679              | SCO2                  | 6.75E-07             | 1.14  | 3.09  | 3.68   | 1.64   | 1.33   | -1.14   | cco cytochrome oxidase deficient homolog 2 (yeast)                  |
| MmugDNA.9650.1.S1_at    | LOC714914              | DTX3L                 | 1.03E-09             | 1.19  | 3.57  | 3.63   | 1.80   | 1.38   | 1.06    | deltex 3-like (drosophila)                                          |
| MmuSTS.2101.1.S1_at     | LOC702775              | RIN2                  | 0.000570969          | 1.29  | 3.30  | 3.61   | 1.66   | -1.01  | 1.23    | ras and rab interactor 2                                            |
| MmugDNA.19992.1.S1_at   | TRIM5                  | TRIM5                 | 1.04E-06             | 1.16  | 3.31  | 3.59   | 1.69   | 1.41   | -1.07   | tripartite motif-containing 5                                       |
| MmugDNA.24620.1.S1_at   | ---                    | ---                   | 0.00134118           | 1.47  | 3.51  | 3.57   | 1.59   | 1.82   | -1.08   | ---                                                                 |
| MmugDNA.2176.1.S1_at    | ISG20                  | ISG20                 | 8.12E-07             | 1.10  | 3.06  | 3.55   | 1.83   | 1.40   | 1.07    | interferon stimulated exonuclease gene 20kda                        |
| MmugDNA.7052.1.S1_at    | UBEL2L6                | UBEL2L6               | 4.46E-06             | 1.29  | 3.21  | 3.52   | 1.90   | 1.37   | 1.24    | ubiquitin-conjugating enzyme e2l 6                                  |
| MmugDNA.9266.1.S1_at    | LOC716161              | ECGF1                 | 0.000236943          | 1.41  | 3.79  | 3.51   | 1.81   | 1.85   | 1.23    | endothelial cell growth factor 1 (platelet-derived)                 |
| MmugDNA.41833.1.S1_at   | LOC719092              | BST2                  | 0.000272929          | 1.18  | 3.21  | 3.50   | 2.22   | 1.43   | -1.08   | bone marrow stromal cell antigen 2                                  |
| MmuSTS.3349.1.S1_at     | LOC713715              | CORL2                 | 1.33E-07             | 1.06  | 4.67  | 3.49   | 1.24   | -1.11  | -1.69   | chemokine (c-c motif) receptor-like 2                               |
| MmugDNA.19523.1.S1_s_at | CD164                  | CD164                 | 3.83E-05             | 1.24  | 2.26  | 3.49   | 1.45   | 1.39   | -1.14   | cd164 antigen, sialomucin                                           |
| MmugDNA.8695.1.S1_at    | ---                    | CORO2A                | 3.24E-07             | 1.04  | 2.87  | 3.48   | 1.59   | 1.18   | 1.09    | coronin, actin binding protein, 2a                                  |
| Mmu.11980.1.S1_at       | GNPAT                  | GNPAT                 | 3.81E-06             | 1.26  | 3.30  | 3.46   | 1.78   | 1.70   | 1.12    | bicyclic nucleotide 3-phosphodiesterase                             |
| MmugDNA.42778.1.S1_at   | LOC711680              | PARP12                | 2.84E-12             | 1.20  | 3.74  | 3.44   | 1.58   | 1.32   | 1.12    | poly (adp-ribose) polymerase family, member 12                      |
| MmugDNA.8251.1.S1_at    | LOC707359              | TMEM140               | 3.58E-08             | -1.01 | 2.45  | 3.44   | 1.26   | 1.03   | -1.36   | hypothetical protein flj11000                                       |
| MmugDNA.20774.1.S1_at   | ---                    | CD274                 | 5.04E-07             | 1.05  | 3.06  | 3.40   | 1.43   | -1.01  | -1.53   | cd274 antigen                                                       |
| MmugDNA.4421.1.S1_at    | LOC696886              | MNFB                  | 0.000479046          | 1.20  | 2.97  | 3.39   | 1.81   | 1.50   | 1.16    | v-maf musculoaponeurotic fibrosarcoma oncogene homolog 6 (avian)    |
| MmugDNA.9176.1.S1_at    | ATP5G1                 | CNP                   | 3.25E-09             | 1.10  | 2.80  | 3.38   | 1.64   | 1.23   | 1.20    | 2',3'-cyclic nucleotide 3-phosphodiesterase                         |
| MmugDNA.38530.1.S1_at   | LOC717470              | SIGLEC1               | 2.19E-06             | 1.08  | 2.73  | 3.37   | 1.44   | 1.27   | -1.07   | sialic acid binding ig-like lectin 1, sialoadhesin                  |
| MmuSTS.1204.1.S1_at     | TLR2                   | TLR2                  | 1.43E-05             | 1.28  | 2.00  | 3.36   | 1.31   | 1.10   | -1.30   | tol-like receptor 2                                                 |
| MmugDNA.3158.1.S1_at    | CCL8                   | CCL8                  | 5.07E-06             | -1.10 | 1.99  | 3.35   | 1.28   | -1.10  | -1.01   | chemokine (c-c motif) ligand 8                                      |
| MmuSTS.25388.1.S1_at    | ---                    | RIN2                  | 1.32E-05             | 1.22  | 2.12  | 3.33   | 1.19   | 1.35   | 1.12    | ras and rab interactor 2                                            |
| MmugDNA.13395.1.S1_at   | LOC719253              | IFI16                 | 0.000596069          | -1.32 | 2.75  | 3.33   | 1.75   | 1.44   | -1.83   | interferon, gamma-inducible protein 16                              |
| MmugDNA.21377.1.S1_at   | LOC705910              | MOV10                 | 2.68E-05             | 1.08  | 2.83  | 3.32   | 1.32   | 1.23   | 1.09    | mov10, moloney leukemia virus 10, homolog (mouse)                   |
| MmugDNA.5661.1.S1_at    | LOC719402              | KIAA0082              | 2.33E-11             | 1.22  | 3.88  | 3.30   | 1.93   | 1.52   | 1.20    | kiaa0082                                                            |
| MmugDNA.3485.1.S1_at    | ---                    | EPST11                | 7.57E-07             | 1.27  | 4.30  | 3.26   | 2.91   | 1.61   | 1.16    | epithelial stromal interaction 1 (breast)                           |
| MmugDNA.16432.1.S1_at   | INDO                   | INDO                  | 0.00465945           | 1.19  | 3.31  | 3.20   | 2.80   | 1.41   | 1.40    | indoleamine-pyrole 2,3-dioxygenase                                  |
| MmuSTS.4059.1.S1_at     | TRIM21                 | TRIM21                | 1.30E-07             | 1.09  | 2.64  | 3.16   | 1.19   | 1.19   | 1.02    | tripartite motif-containing 21                                      |
| MmugDNA.19224.1.S1_at   | LOC710375              | LGALS8                | 1.01E-07             | 1.28  | 3.26  | 3.14   | 1.35   | 1.37   | 1.08    | lectin, galactoside-binding, soluble, 8 (galectin 8)                |
| MmugDNA.38658.1.S1_at   | TLR6                   | TLR6                  | 0.00163381           | 1.11  | 2.53  | 3.13   | 1.36   | 1.18   | -1.62   | tol-like receptor 6                                                 |
| MmugDNA.3343.1.S1_at    | ---                    | SOC3S                 | 0.00235681           | 1.02  | 1.36  | 3.13   | 1.63   | -1.48  | -1.97   | suppressor of cytokine signaling 3                                  |
| MmuSTS.3554.1.S1_at     | LOC705554              | DHRS9                 | 1.28E-08             | 1.02  | 2.75  | 3.07   | 1.35   | 1.05   | -1.14   | dehydrogenase/reductase (sdr family) member 9                       |
| Mmu.11363.1.S1_at       | CXCL10                 | CXCL10                | 2.19E-05             | -1.23 | 1.42  | 3.05   | 1.02   | -1.21  | -1.16   | chemokine (e-x-c motif) ligand 10                                   |
| Mmu.2142.1.S1_at        | TRIM22                 | TRIM22                | 4.55E-05             | 1.36  | 3.52  | 3.02   | 1.44   | 1.31   | 1.09    | tripartite motif-containing 22                                      |
| MmuSTS.2728.1.S1_at     | LOC706004              | GONL5                 | 7.17E-12             | -1.14 | 2.72  | 3.01   | -1.10  | -1.08  | -1.18   | gon5 general control of amino-acid synthesis 5-like 2 (yeast)       |
| MmugDNA.34119.1.S1_at   | FGL2                   | FGL2                  | 1.57E-06             | 1.31  | 2.49  | 2.98   | 1.81   | 1.09   | 1.07    | fibrinogen-like 2                                                   |
| MmugDNA.25916.1.S1_at   | LOC712322              | PLSCR1                | 1.10E-06             | 1.52  | 4.32  | 2.98   | 1.98   | 1.30   | 1.36    | phospholipid scramblase 1                                           |
| MmugDNA.12946.1.S1_at   | ---                    | PML                   | 3.53E-08             | 1.02  | 2.22  | 2.97   | 1.36   | 1.25   | -1.02   | promyelocytic leukemia                                              |
| MmugDNA.11328.1.S1_at   | ATF3                   | ATF3                  | 4.52E-12             | -1.07 | 3.30  | 2.96   | 1.10   | -1.15  | 1.03    | activating transcription factor 3                                   |
| MmugDNA.40745.1.S1_at   | LOC710316              | MLKL                  | 5.01E-11             | 1.14  | 3.22  | 2.96   | 1.44   | 1.16   | -1.08   | mixed lineage kinase domain-like                                    |
| MmugDNA.42826.1.S1_at   | LOC710406              | C21ORF91              | 0.00010876           | -1.02 | 2.38  | 2.92   | 1.51   | -1.03  | -1.16   | chromosome 21 open reading frame 91                                 |
| MmugDNA.4767.1.S1_at    | ---                    | LOC441108             | 7.58E-06             | 1.04  | 1.88  | 2.91   | -1.05  | 1.29   | 1.13    | hypothetical gene supported by ak128882                             |
| MmugDNA.10146.1.S1_at   | LOC712588              | TRIM25                | 1.39E-06             | 1.09  | 2.03  | 2.90   | 1.37   | 1.35   | -1.26   | tripartite motif-containing 25                                      |
| MmugDNA.22619.1.S1_x_at | LOC710928              | UNC93B1               | 9.84E-05             | 1.16  | 2.69  | 2.90   | 1.41   | 1.39   | 1.26    | unc-93 homolog b1 (c. elegans)                                      |
| MmugDNA.1812.1.S1_at    | LOC696090              | ZBP1                  | 0.00337309           | 1.08  | 1.97  | 2.88   | 1.44   | 1.41   | 1.16    | z-dna binding protein 1                                             |
| MmugDNA.31841.1.S1_at   | TNFSF13B               | TNFSF13B              | 9.49E-07             | 1.48  | 3.12  | 2.88   | 1.90   | 1.61   | -1.15   | tumor necrosis factor (ligand) superfamily, member 13b              |
| MmugDNA.28886.1.S1_at   | LOC717665              | C6ORF150              | 0.000460982          | -1.08 | 2.31  | 2.87   | 1.47   | 1.02   | -1.18   | chromosome 6 open reading frame 150                                 |
| MmuSTS.3639.1.S1_at     | ---                    | EXT1                  | 3.25E-05             | 1.22  | 2.01  | 2.85   | 1.39   | 1.30   | 1.17    | extostoses (multiple) 1                                             |
| MmuSTS.4171.1.S1_at     | MSRA                   | MSRA                  | 5.93E-06             | 1.06  | 2.78  | 2.84   | 1.30   | 1.21   | -1.12   | methionine sulfoxide reductase a                                    |
| MmugDNA.22619.1.S1_at   | LOC710928              | UNC93B1               | 1.24E-05             | 1.11  | 2.59  | 2.83   | 1.45   | 1.29   | 1.28    | unc-93 homolog b1 (c. elegans)                                      |
| MmugDNA.11115.1.S1_s_at | LOC707033              | LOC707033             | 6.19E-06             | 1.22  | 2.74  | 2.81   | 1.41   | 1.26   | 1.23    | ---                                                                 |
| MmugDNA.11765.1.S1_at   | LOC694240              | ANKRD22               | 5.46E-05             | 1.62  | 4.45  | 2.81   | 2.29   | 1.51   | -1.04   | ankyrin repeat domain 22                                            |
| MmugDNA.4964.1.S1_at    | LOC707625              | SPTLC2                | 5.25E-09             | 1.11  | 2.41  | 2.77   | 1.11   | -1.09  | 1.16    | serine palmitoyltransferase, long chain base subunit 2              |
| MmugDNA.6326.1.S1_at    | ---                    | SLFN5                 | 0.000409565          | -1.07 | 2.80  | 2.77   | 1.93   | 1.49   | -1.61   | likely ortholog of mouse schlafen 5                                 |
| Mmu.12096.1.S1_at       | ---                    | DCP2                  | 1.02E-06             | 1.19  | 2.09  | 2.77   | 1.58   | 1.07   | -1.02   | dcp2 decapping enzyme homolog (s. cerevisiae)                       |
| MmugDNA.27375.1.S1_at   | ---                    | PHACTR2               | 3.44E-06             | 1.03  | 4.08  | 2.76   | 1.50   | 1.51   | -1.03   | phosphatase and actin regulator 2                                   |
| MmugDNA.17749.1.S1_at   | ---                    | XAF1                  | 0.000347891          | -1.11 | 2.68  | 2.75   | 1.73   | 1.11   | -1.11   | xiap associated factor-1                                            |
| MmuSTS.1188.1.S1_at     | LOC712332              | PLSCR1                | 1.30E-05             | 1.40  | 3.97  | 2.74   | 1.96   | 1.39   | 1.41    | phospholipid scramblase 1                                           |
| MmugDNA.36516.1.S1_at   | GNPAT                  | GNPAT                 | 4.15E-06             | 1.16  | 2.50  | 2.73   | 1.75   | 1.52   | 1.08    | interferon-stimulated transcription factor 3, gamma 48kda           |
| MmuSTS.1659.1.S1_at     | LOC707072              | RPL4                  | 0.000493846          | 1.47  | 2.58  | 2.73   | 1.72   | 1.30   | 1.30    | ribosomal protein l4                                                |
| MmuSTS.3489.1.S1_at     | LOC715923              | Cd68                  | 0.000148034          | 1.33  | 2.16  | 2.72   | 1.72   | 1.14   | 2.20    | cd68 antigen                                                        |
| Mmu.8122.1.A1_at        | LOC712588              | TRIM25                | 1.87E-07             | 1.07  | 1.94  | 2.72   | 1.29   | 1.03   | -1.40   | tripartite motif-containing 25                                      |
| Mmu.11961.1.S1_at       | GBP1                   | GBP1                  | 0.000165902          | -1.15 | 1.96  | 2.71   | 1.01   | -1.04  | -1.03   | guanylate binding protein 1, interferon-inducible, 67kda            |
| MmugDNA.29290.1.S1_at   | ---                    | PHACTR2               | 4.37E-06             | 1.24  | 4.10  | 2.71   | 2.30   | 1.53   | -1.03   | phosphatase and actin regulator 2                                   |
| MmugDNA.37307.1.S1_at   | LOC699295              | LBA1                  | 8.27E-06             | 1.03  | 1.70  | 2.70   | -1.01  | 1.15   | 1.03    | lupus brain antigen 1                                               |
| MmugDNA.14153.1.S1_at   | LOC710375              | LGALS8                | 3.89E-07             | 1.24  | 3.31  | 2.70   | 1.62   | 1.27   | -1.02   | lectin, galactoside-binding, soluble, 8 (galectin 8)                |

| Affymetrix Probeset ID  | Affymetrix Gene Symbol | Corrected Gene Symbol | ANOVA (time) p-value | D3/Dc | D7/Dc | D10/Dc | D14/Dc | D30/Dc | D180/Dc | Gene Description                                                                  |
|-------------------------|------------------------|-----------------------|----------------------|-------|-------|--------|--------|--------|---------|-----------------------------------------------------------------------------------|
| MmugDNA.30463.1.S1_at   | NMI                    | NMI                   | 1.88E-07             | 1.25  | 3.04  | 2.69   | 1.81   | 1.28   | -1.23   | n-myc (and stat) interactor                                                       |
| MmugDNA.31960.1.S1_at   | ---                    | XRN1                  | 4.36E-07             | 1.17  | 1.78  | 2.69   | 1.30   | -1.06  | -1.09   | 5'-3' exonuclease 1                                                               |
| MmuSTS.3917.1.S1_at     | STAT1                  | STAT1                 | 7.80E-10             | 1.40  | 3.37  | 2.65   | 2.31   | 1.23   | 1.17    | signal transducer and activator of transcription 1, 91kda                         |
| MmugDNA.38197.1.S1_at   | LOC720683              | LOC440836             | 0.00104084           | 1.38  | 3.51  | 2.68   | 1.85   | 1.80   | 1.01    | similar to mgs2679 protein                                                        |
| MmugDNA.22837.1.S1_at   | WARS                   | WARS                  | 0.00748293           | 1.49  | 2.35  | 2.66   | 1.61   | 1.19   | 1.42    | interferon-induced protein 53                                                     |
| MmugDNA.685.1.S1_at     | LOC716161              | ECGF1                 | 0.0117046            | -1.04 | 2.23  | 2.66   | 1.60   | 1.48   | -1.09   | endothelial cell growth factor 1 (platelet-derived)                               |
| MmugDNA.36872.1.S1_at   | LOC694916              | LYSMD2                | 0.005500459          | 1.10  | 2.74  | 2.65   | 1.54   | 1.15   | 1.19    | lysm, putative peptidoglycan-binding, domain containing 2                         |
| MmuSTS.3115.1.S1_at     | ---                    | MXD1                  | 0.000464429          | 1.01  | 1.63  | 2.62   | 1.24   | 1.18   | 1.01    | max dimerization protein 1                                                        |
| MmugDNA.19097.1.S1_at   | ---                    | SHROOM4               | 5.14E-06             | -1.06 | 1.82  | 2.62   | 1.24   | 1.04   | 1.08    | kiaa1202 protein                                                                  |
| MmugDNA.24210.1.S1_at   | ---                    | ATF6                  | 1.84E-05             | 1.22  | 2.61  | 2.58   | 1.30   | 1.16   | -1.27   | activating transcription factor 6                                                 |
| MmugDNA.42447.1.S1_s_at | LOC719253              | IF116                 | 6.19E-05             | 1.44  | 2.86  | 2.58   | 1.99   | 1.54   | 1.28    | interferon, gamma-inducible protein 16                                            |
| MmugDNA.28999.1.S1_at   | LOC718036              | KIAA1618              | 1.35E-07             | 1.07  | 2.31  | 2.58   | 1.64   | 1.33   | -1.20   | kiaa1618                                                                          |
| MmugDNA.33090.1.S1_at   | ---                    | RNF213                | 0.132419             | 1.10  | 1.61  | 2.57   | 1.22   | 1.29   | 1.12    | chromosome 17 open reading frame 27                                               |
| MmunevRS.902.1.S1_at    | LOC702068              | EMB                   | 0.00152003           | 1.34  | 2.13  | 2.56   | 1.70   | 1.20   | -1.07   | ambigin homolog (mouse)                                                           |
| MmugDNA.29742.1.S1_at   | LOC715410              | CD163                 | 0.0499428            | 1.76  | 2.37  | 2.53   | 1.60   | 1.61   | 1.25    | cd163 antigen                                                                     |
| MmugDNA.17877.1.S1_at   | ---                    | PKML                  | 0.0033246            | 1.09  | 2.03  | 2.53   | 1.11   | 1.25   | 1.22    | promyelocytic leukemia                                                            |
| MmuSTS.1580.1.S1_at     | ---                    | IFIT5                 | 0.001136             | 1.10  | 3.41  | 2.51   | 1.59   | 1.39   | -1.00   | interferon-induced protein with tetratricopeptide repeats 5                       |
| MmugDNA.2761.1.S1_at    | SP100                  | SP100                 | 3.15E-08             | 1.20  | 2.66  | 2.51   | 1.82   | 1.27   | 1.02    | sp100 nuclear antigen                                                             |
| MmugDNA.5794.1.S1_at    | MT2A                   | MT2A                  | 0.000324057          | 1.28  | 3.04  | 2.50   | 1.50   | 1.42   | 1.36    | metallothionein 2a                                                                |
| MmugDNA.34145.1.S1_at   | LOC704928              | DYLNLT1               | 2.17E-07             | 1.22  | 2.82  | 2.50   | 1.44   | 1.29   | -1.04   | dynein, light chain, ctctx-type 1                                                 |
| MmugDNA.22222.1.S1_at   | ---                    | NBN                   | 0.00303202           | -1.13 | 1.77  | 2.48   | 1.40   | -1.09  | -1.35   | nlbriin                                                                           |
| MmugDNA.59501.1.S1_at   | LOC708132              | PARP10                | 8.32E-06             | 1.03  | 1.98  | 2.49   | 1.10   | 1.21   | 1.11    | poly (adp-ribose) polymerase family, member 10                                    |
| MmugDNA.35965.1.S1_at   | LOC704259              | CXORF21               | 0.000265535          | 1.25  | 2.53  | 2.48   | 1.73   | 1.55   | -1.27   | chromosome x open reading frame 21                                                |
| MmugDNA.25634.1.S1_at   | WARS                   | WARS                  | 0.00076498           | 1.38  | 2.22  | 2.48   | 1.67   | 1.20   | 1.30    | interferon-induced protein 53                                                     |
| MmugDNA.29385.1.S1_at   | LOC711648              | MIRN21                | 5.04E-05             | 1.28  | 2.01  | 2.47   | 2.05   | 1.32   | -1.32   | microrna 21                                                                       |
| MmugDNA.9703.1.S1_at    | TREM1                  | TREM1                 | 0.00187869           | 1.22  | 1.92  | 2.47   | 1.16   | 1.34   | -1.17   | triggering receptor expressed on myeloid cells 1                                  |
| MmugDNA.13991.1.S1_at   | LILRAD                 | LILRA3                | 2.24E-05             | 1.05  | 1.47  | 2.47   | 1.03   | -1.06  | -1.27   | leukocyte immunoglobulin-like receptor, subfamily a (without tm domain), member 3 |
| MmugDNA.9495.1.S1_at    | ---                    | PHACTR2               | 2.50E-05             | 1.02  | 2.29  | 2.46   | 1.45   | 1.08   | -1.01   | phosphatase and actin regulator 2                                                 |
| MmunevRS.833.1.S1_s_at  | APOBEC3H               | APOBEC3H              | 2.14E-05             | 1.04  | 1.90  | 2.48   | 1.28   | 1.07   | 1.13    | ap10 protein                                                                      |
| MmuSTS.4535.1.S1_at     | LOC700118              | ERAP2                 | 0.00010459           | 1.23  | 2.00  | 2.48   | 1.21   | 1.12   | 1.14    | leukocyte-derived arginine aminopeptidase                                         |
| MmugDNA.3988.1.S1_at    | LOC694240              | ANKRD22               | 1.12E-06             | 1.28  | 2.56  | 2.48   | 2.08   | 1.08   | -1.03   | ankyrin repeat domain 22                                                          |
| MmugDNA.635.1.S1_at     | TNFSF13B               | TNFSF13B              | 2.00E-07             | 1.35  | 3.42  | 2.44   | 1.98   | 1.31   | -1.30   | tumor necrosis factor (ligand) superfamily, member 13b                            |
| MmugDNA.36766.1.S1_at   | TOR1B                  | TOR1B                 | 1.33E-05             | 1.33  | 2.77  | 2.44   | 1.42   | 1.19   | 1.03    | torsin family 1, member b (torsin b)                                              |
| MmugDNA.32890.1.S1_at   | LOC71355               | NAPA                  | 7.38E-06             | 1.05  | 2.38  | 2.44   | 1.43   | 1.14   | 1.04    | n-ethylmaleimide-sensitive factor attachment protein, alpha                       |
| Mmu.4440.1.S1_at        | LOC693561              | PI4K2B                | 8.55E-06             | -1.01 | 2.14  | 2.44   | 1.06   | 1.25   | 1.16    | phosphatidylinositol 4-kinase type 2 beta                                         |
| MmugDNA.19.1.S1_at      | SCIN                   | SCIN                  | 0.00208969           | 1.10  | 1.89  | 2.44   | 1.39   | 1.10   | -1.02   | scindurin                                                                         |
| MmugDNA.252.1.S1_at     | P2RY2                  | P2RY2                 | 0.0313536            | 1.39  | 2.16  | 2.44   | 1.69   | 1.35   | 1.28    | purinergic receptor p2y, g-protein coupled, 2                                     |
| MmunevRS.254.1.S1_at    | IFI27                  | IFI27                 | 0.0739484            | 1.31  | 4.27  | 2.43   | 2.39   | 1.62   | 1.35    | interferon, alpha-inducible protein 27                                            |
| MmugDNA.41043.1.S1_at   | ---                    | NBN                   | 0.00100475           | -1.15 | 1.79  | 2.43   | 1.46   | 1.10   | -1.87   | nlbriin                                                                           |
| MmugDNA.30432.1.S1_at   | ---                    | MSRA                  | 0.000505459          | 1.01  | 1.82  | 2.43   | -1.02  | 1.14   | 1.11    | methylene sulfide reductase a                                                     |
| MmugDNA.41060.1.S1_at   | ---                    | PHF11                 | 5.54E-07             | 1.09  | 2.17  | 2.43   | 1.09   | 1.11   | 1.01    | phd finger protein 11                                                             |
| MmugDNA.41044.1.S1_at   | ---                    | NBN                   | 0.00107677           | -1.06 | 1.74  | 2.42   | 1.47   | -1.17  | -1.38   | nlbriin                                                                           |
| MmugDNA.27150.1.S1_at   | LOC699207              | PATL1                 | 0.000441782          | -1.09 | 2.04  | 2.42   | 1.02   | 1.07   | -1.04   | h36874 protein                                                                    |
| MmugDNA.9795.1.S1_at    | LOC715418              | TRIM14                | 7.79E-07             | -1.07 | 1.88  | 2.42   | 1.09   | 1.14   | 1.05    | tripartite motif-containing 14                                                    |
| MmugDNA.39691.1.S1_s_at | TRIM38                 | TRIM38                | 0.00013425           | 1.21  | 2.45  | 2.42   | 1.20   | 1.15   | 1.06    | tripartite motif-containing 38                                                    |
| MmugDNA.29151.1.S1_at   | ---                    | SPTLC2                | 1.29E-05             | 1.17  | 1.95  | 2.41   | 1.29   | 1.18   | -1.07   | serine palmitoyltransferase, long chain base subunit 2                            |
| MmugDNA.8672.1.S1_at    | LOC704374              | SDC3                  | 9.27E-07             | -1.03 | 1.50  | 2.41   | 1.13   | 1.04   | -1.09   | syndecan 3 (n-syndecan)                                                           |
| MmugDNA.22615.1.S1_s_at | ---                    | ---                   | 7.30E-08             | 1.08  | 2.08  | 2.40   | -1.01  | 1.11   | -1.05   | ---                                                                               |
| MmugDNA.40394.1.S1_at   | LY6E                   | LY6E                  | 6.11E-05             | 1.17  | 1.93  | 2.40   | 1.25   | 1.32   | 1.54    | lymphocyte antigen 6 complex, locus e                                             |
| MmugDNA.36105.1.S1_at   | LOC697051              | AMDHD2                | 0.0105833            | 1.29  | 1.74  | 2.40   | 1.45   | 1.47   | 1.24    | amidohydrolase domain containing 2                                                |
| MmugDNA.28553.1.S1_at   | LOC705017              | PIK3AP1               | 7.19E-06             | 1.02  | 2.26  | 2.40   | -1.08  | -1.01  | -1.03   | phosphoinositide-3-kinase adaptor protein 1                                       |
| MmugDNA.12091.1.S1_at   | BAK1                   | BCL2L7P1              | 1.61E-05             | 1.10  | 1.92  | 2.39   | 1.41   | 1.31   | 1.19    | nc2-like 7 pseudogene 1                                                           |
| MmugDNA.9235.1.S1_s_at  | ---                    | ADAR                  | 1.58E-06             | 1.15  | 2.49  | 2.39   | 1.28   | 1.22   | -1.05   | adenosine deaminase, ma-specific                                                  |
| MmugDNA.32046.1.S1_at   | LOC720688              | KLHDC7B               | 0.000202804          | 1.00  | 1.45  | 2.38   | 1.20   | 1.13   | 1.03    | helix domain containing 7b                                                        |
| MmugDNA.1987.1.S1_at    | SLC2A5                 | SLC2A5                | 0.000245713          | 1.13  | 1.89  | 2.38   | 1.71   | 1.22   | 1.09    | solute carrier family 2 (facilitated glucose/fructose transporter), member 5      |
| MmugDNA.222.1.S1_at     | ---                    | EMB                   | 0.000691604          | 1.26  | 2.09  | 2.38   | 1.48   | 1.28   | -1.24   | ambigin homolog (mouse)                                                           |
| MmugDNA.2075.1.S1_at    | LOC710877              | SMCHD1                | 0.00515              | 1.23  | 2.84  | 2.38   | 1.50   | 1.12   | -1.11   | structural maintenance of chromosomes flexible hinge domain containing 1          |
| MmugDNA.13466.1.S1_at   | LOC720056              | ATF6                  | 0.000386833          | 1.04  | 1.85  | 2.34   | 1.18   | 1.04   | -1.24   | activating transcription factor 6                                                 |
| Mmu.13989.1.S1_at       | LOC719212              | LOC719212             | 0.000231713          | 1.24  | 1.86  | 2.34   | 1.44   | 1.32   | 1.11    | ---                                                                               |
| MmugDNA.27352.1.S1_at   | ZNFX1                  | ZNFX1                 | 2.20E-08             | 1.01  | 2.08  | 2.34   | 1.10   | -1.05  | -1.22   | zinc finger, nfx1-type containing 1                                               |
| MmugDNA.2972.1.S1_at    | ---                    | SP140                 | 0.000254037          | 1.00  | 1.74  | 2.33   | -1.10  | 1.16   | 1.05    | sp140 nuclear body protein                                                        |
| MmuSTS.1849.1.S1_at     | DTX1                   | DTX1                  | 2.41E-05             | -1.00 | 1.79  | 2.33   | 2.35   | 1.37   | 1.20    | deltex homolog 1 (drosophila)                                                     |
| Mmu.7836.1.S1_x_at      | CFLAR                  | CFLAR                 | 0.00394086           | 1.38  | 2.01  | 2.33   | 1.15   | 1.32   | -1.10   | casp8 and fadd-like apoptosis regulator                                           |
| MmuSTS.3660.1.S1_at     | POR                    | POR                   | 0.000851062          | 1.13  | 1.95  | 2.33   | 1.14   | 1.28   | 1.06    | p450 (cytochrome) oxidoreductase                                                  |
| MmugDNA.33437.1.S1_s_at | LOC713517              | ZNF313                | 8.80E-08             | 1.06  | 2.13  | 2.33   | 1.08   | 1.11   | -1.18   | zinc finger protein 313                                                           |
| MmugDNA.35809.1.S1_at   | ---                    | HIRA                  | 0.000412482          | 1.16  | 1.86  | 2.31   | 1.05   | 1.08   | 1.05    | hir histone cell cycle regulation defective homolog a (s. cerevisiae)             |
| MmugDNA.10692.1.S1_at   | LOC702542              | SCOTIN                | 1.27E-05             | 1.14  | 2.33  | 2.29   | 1.31   | 1.23   | 1.16    | scotin                                                                            |
| MmugDNA.27480.1.S1_at   | LOC710375              | LGALS8                | 0.00393605           | -1.02 | 2.54  | 2.29   | 1.27   | 1.27   | 1.11    | lectin, galactoside-binding, soluble, 8 (galactin 8)                              |
| MmugDNA.20995.1.S1_at   | ---                    | CCR1                  | 3.99E-05             | 1.14  | 2.36  | 2.29   | 1.32   | -1.08  | -1.31   | chemokine (c-c motif) receptor 1                                                  |
| MmugDNA.34302.1.S1_at   | GBP1                   | GBP1                  | 0.000763536          | 1.13  | 1.80  | 2.28   | 1.07   | 1.16   | 1.15    | guanylate binding protein 1, interferon-inducible, 67kda                          |
| MmugDNA.15480.1.S1_at   | ---                    | ZC3HAV1               | 5.80E-06             | 1.13  | 2.08  | 2.28   | 1.19   | 1.07   | -1.05   | zinc finger coxh-type, antiviral 1                                                |
| MmuSTS.2931.1.S1_at     | LOC693427              | KCNJ15                | 0.0136841            | 1.04  | 1.14  | 2.28   | 1.31   | -1.04  | -1.25   | potassium inwardly-rectifying channel, subfamily j, member 15                     |
| MmugDNA.14810.1.S1_at   | LOC711784              | TRAFD1                | 3.04E-07             | 1.10  | 2.13  | 2.27   | 1.14   | 1.03   | 1.06    | traf-type zinc finger domain containing 1                                         |
| MmugDNA.3702.1.S1_at    | LOC702068              | EMB                   | 3.32E-05             | 1.27  | 2.31  | 2.25   | 1.83   | 1.09   | -1.21   | ambigin homolog (mouse)                                                           |
| MmugDNA.9213.1.S1_at    | ---                    | FLJ11286              | 2.64E-06             | -1.07 | 1.81  | 2.25   | 1.02   | 1.14   | 1.01    | hypothetical protein flj11286                                                     |
| MmugDNA.12018.1.S1_at   | LOC712342              | OAS3                  | 7.06E-06             | -1.24 | 1.70  | 2.25   | 1.03   | -1.04  | -1.07   | 2'-5'-oligoadenylate synthetase 3, 100kda                                         |
| MmugDNA.27315.1.S1_at   | ---                    | SAMD9                 | 1.88E-06             | 1.15  | 2.46  | 2.25   | 1.96   | 1.37   | -1.33   | sterile alpha motif domain containing 9                                           |
| MmugDNA.40942.1.S1_at   | ---                    | SAMD4A                | 0.00715835           | 1.15  | 2.38  | 2.24   | 1.42   | -1.27  | -1.01   | sterile alpha motif domain containing 4a                                          |
| MmugDNA.4403.1.S1_at    | ---                    | ---                   | 0.000410364          | -1.09 | 1.48  | 2.24   | 1.08   | 1.28   | -1.26   | ---                                                                               |
| MmugDNA.7816.1.S1_at    | LOC696542              | CYBB                  | 0.00683444           | 1.20  | 1.88  | 2.23   | 1.47   | 1.27   | -1.00   | cytochrome b-245, beta polypeptide (chronic granulomatous disease)                |
| MmugDNA.21968.1.S1_at   | LOC707887              | LOC707887             | 0.000235007          | 1.12  | 2.10  | 2.22   | 1.55   | 1.33   | 1.03    | ---                                                                               |
| MmuSTS.805.1.S1_at      | PTP5G1                 | ATP5G1                | 0.0071991            | 1.06  | 1.86  | 2.22   | 1.21   | 1.28   | 1.24    | atp synthase, h+ transporting, mitochondrial fo complex, subunit c1 (subunit 9)   |
| MmugDNA.1553.1.S1_at    | ACT9AIRE2BP            | TRD7                  | 0.00916              | 1.25  | 2.07  | 2.21   | 1.46   | 1.26   | 1.15    | tudor domain containing 7                                                         |
| MmugDNA.4312.1.S1_at    | ---                    | CLEC7A                | 0.00114384           | 1.70  | 2.41  | 2.21   | 1.76   | 1.39   | 1.17    | c-type lectin domain family 7, member a                                           |
| MmugDNA.1096.1.S1_at    | LOC695727              | MVP                   | 0.000131212          | 1.06  | 1.56  | 2.20   | 1.03   | 1.13   | -1.07   | major vault protein                                                               |
| MmugDNA.1519.1.S1_at    | ---                    | KIAA1618              | 3.72E-07             | 1.13  | 1.79  | 2.20   | -1.02  | 1.30   | -1.03   | kiaa1618                                                                          |
| MmugDNA.12648.1.S1_at   | ---                    | TRIM22                | 1.39E-07             | 1.31  | 2.89  | 2.19   | 1.59   | 1.31   | 1.10    | tripartite motif-containing 22                                                    |
| MmugDNA.42437.1.S1_at   | LOC71355               | NAPA                  | 7.39E-05             | 1.20  | 2.09  | 2.19   | 1.30   | 1.24   | 1.18    | n-ethylmaleimide-sensitive factor attachment protein, alpha                       |
| MmugDNA.26949.1.S1_at   | ---                    | TRIM26                | 8.34E-09             | 1.11  | 1.83  | 2.18   | 1.14   | 1.13   | 1.20    | tripartite motif-containing 26                                                    |
| MmugDNA.32362.1.S1_at   | ---                    | MAFB                  | 0.00169912           | 1.44  | 2.03  | 2.18   | 1.99   | 1.10   | 1.08    | -maf musculosarcoma oncogene homolog                                              |

| Affymetrix Probeset ID  | Affymetrix Gene Symbol | Corrected Gene Symbol | ANOVA (time) p-value | D3/Dc | D7/Dc | D10/Dc | D14/Dc | D30/Dc | D180/Dc | Gene Description                                                                  |
|-------------------------|------------------------|-----------------------|----------------------|-------|-------|--------|--------|--------|---------|-----------------------------------------------------------------------------------|
| MmuqDNA.1081.1.S1_at    | LOC17726               | TAP1                  | 0.000147782          | 1.15  | 2.02  | 2.12   | 1.29   | 1.21   | 1.09    | transporter 1, atp-binding cassette, sub-family b (mdr/lap)                       |
| MmuSTS.1444.1.S1_at     | LMO2                   | LMO2                  | 5.25E-06             | 1.17  | 2.37  | 2.15   | 1.43   | 1.15   | -1.02   | lim domain only 2 (rhombotin-like 1)                                              |
| MmuqDNA.10606.1.S1_at   | LOC114244              | SP110                 | 0.00281181           | -1.13 | 1.88  | 2.14   | 1.15   | 1.49   | -1.18   | sp110 nuclear body protein                                                        |
| MmuqDNA.25884.1.S1_at   | ---                    | SLC26A11              | 0.00270576           | -1.11 | 1.74  | 2.14   | 1.28   | 1.09   | 1.13    | solute carrier family 26, member 11                                               |
| MmuqDNA.1574.1.S1_at    | ---                    | ---                   | 2.95E-08             | -1.06 | 1.44  | 2.14   | 1.03   | -1.15  | 1.14    | ---                                                                               |
| MmuqDNA.17449.1.S1_at   | LOC704124              | TFEC                  | 2.77E-05             | 1.60  | 2.38  | 2.13   | 2.26   | 1.20   | 1.09    | transcription factor ec                                                           |
| MmuqDNA.16390.1.S1_at   | LILRB3                 | ARG2                  | 0.000390904          | 1.07  | 1.43  | 2.12   | -1.09  | -1.04  | -1.52   | arginase, type ii                                                                 |
| MmuqDNA.23750.1.S1_at   | ---                    | PARP11                | 7.61E-06             | 1.32  | 2.42  | 2.12   | 1.52   | 1.16   | 1.19    | poly (adp-ribose) polymerase family, member 11                                    |
| MmuqDNA.39346.1.S1_at   | LOC710518              | SLC25A37              | 0.0160744            | 1.06  | 1.81  | 2.11   | 1.02   | 1.00   | -1.61   | solute carrier family 25, member 37                                               |
| MmuqDNA.22222.1.S1_s_at | ---                    | NBN                   | 0.0167091            | -1.07 | 1.57  | 2.11   | 1.32   | 1.00   | -1.41   | nibrin                                                                            |
| MmuSTS.4763.1.S1_at     | LOC722740              | FBXO6                 | 0.00106064           | 1.13  | 1.75  | 2.09   | 1.32   | 1.10   | 1.04    | fbx protein 6                                                                     |
| MmuqDNA.2776.1.S1_at    | SP100                  | SP100                 | 1.58E-05             | 1.03  | 1.49  | 2.09   | 1.27   | 1.10   | 1.05    | sp100 nuclear antigen                                                             |
| MmuqDNA.16901.1.S1_at   | LOC709760              | STAT5B                | 0.000222646          | 1.02  | 1.23  | 2.09   | -1.15  | 1.00   | -1.38   | signal transducer and activator of transcription 5b                               |
| MmuqDNA.36699.1.S1_at   | ---                    | DBF4B                 | 1.38E-06             | 1.02  | 2.27  | 2.08   | 1.35   | 1.04   | 1.01    | dbf4 homolog b (s. cerevisiae)                                                    |
| MmuqDNA.41250.1.S1_at   | ---                    | PQR8                  | 0.00024372           | 1.23  | 2.24  | 2.08   | 1.41   | 1.19   | 1.04    | progesterin and adipoq receptor family member viii                                |
| MmuqDNA.17638.1.S1_at   | ---                    | SPTLC2                | 5.80E-05             | 1.32  | 2.65  | 2.08   | 1.38   | 1.05   | 1.10    | serine palmitoyltransferase, long chain base subunit 2                            |
| MmuqDNA.8141.1.S1_at    | URP1                   | URP1                  | 0.00393546           | 1.26  | 1.70  | 2.08   | 1.18   | -1.08  | -1.09   | uridine phosphorylase 1                                                           |
| MmuSTS.1158.1.S1_at     | PHF11                  | PHF11                 | 8.81E-06             | 1.26  | 2.36  | 2.07   | 1.62   | 1.23   | 1.02    | phd finger protein 11                                                             |
| MmuqDNA.7313.1.S1_at    | LOC694589              | PAPD5                 | 5.66E-07             | 1.28  | 1.86  | 2.08   | 1.09   | 1.14   | 1.17    | pap associated domain containing 5                                                |
| MmuqDNA.28698.1.S1_x_at | ---                    | SAMD9                 | 0.00029096           | 1.19  | 2.32  | 2.06   | 1.74   | 1.14   | -1.12   | sterile alpha motif domain containing 9                                           |
| MmuSTS.3742.1.S1_at     | PTX3                   | PTX3                  | 2.01E-05             | -1.18 | 1.67  | 2.05   | 1.64   | -1.03  | -1.43   | pentraxin-related gene, rapidly induced by il-1 beta                              |
| MmuqDNA.16397.1.S1_s_at | LOC700880              | GRN                   | 0.000952245          | 1.18  | 1.75  | 2.05   | 1.07   | 1.23   | 1.02    | granulin                                                                          |
| MmuqDNA.22157.1.S1_at   | ---                    | PCGF5                 | 0.000393579          | -1.03 | 1.84  | 2.05   | 1.02   | 1.10   | -1.11   | polycomb group ring finger 5                                                      |
| MmuqDNA.354.1.S1_at     | LOC705061              | NFE2                  | 0.0019449            | -1.06 | 1.40  | 2.04   | 1.06   | -1.03  | -1.41   | nuclear factor (erythroid-derived 2), 45kda                                       |
| MmuqDNA.2830.1.S1_at    | LOC115866              | APOL3                 | 6.22E-05             | 1.27  | 1.96  | 2.04   | 1.41   | 1.06   | 1.09    | inf-inducible protein cg12-1                                                      |
| MmuqDNA.27554.1.S1_at   | ---                    | C17ORF60              | 3.51E-05             | 1.11  | 2.25  | 2.04   | 1.48   | 1.14   | -1.21   | chromosome 17 open reading frame 60                                               |
| MmuqDNA.27093.1.S1_at   | A2M                    | A2M                   | 0.00836289           | 1.13  | 1.81  | 2.04   | 1.21   | 1.27   | 1.10    | alpha-2-macroglobulin                                                             |
| MmuqDNA.42970.1.S1_at   | LOC710528              | UNC93B1               | 0.000106533          | 1.05  | 1.66  | 2.04   | 1.05   | 1.17   | 1.21    | unc-93 homolog b1 (c. elegans)                                                    |
| MmuqDNA.9155.1.S1_s_at  | LOC697427              | DRAM                  | 1.08E-08             | 1.10  | 2.29  | 2.03   | 1.64   | 1.07   | -1.25   | hypothetical protein flj1259                                                      |
| MmuqDNA.2077.1.S1_at    | ---                    | SMCHD1                | 0.000442218          | 1.29  | 2.30  | 2.03   | 1.64   | 1.07   | -1.20   | structural maintenance of chromosomes flexible hinge domain containing 1          |
| MmuqDNA.27936.1.S1_s_at | ---                    | CFLAR                 | 0.000137849          | -1.01 | 1.31  | 2.01   | -1.04  | 1.04   | -1.03   | caspar and fadd-like apoptosis regulator                                          |
| MmuqDNA.28698.1.S1_at   | ---                    | SAMD9                 | 0.000161518          | 1.19  | 2.26  | 2.01   | 1.73   | 1.12   | -1.16   | sterile alpha motif domain containing 9                                           |
| MmuqDNA.32458.1.S1_at   | ZAN                    | NAGK                  | 0.000245246          | 1.32  | 1.81  | 2.01   | 1.26   | 1.20   | 1.07    | n-acetylglucosamine kinase                                                        |
| MmuSTS.1186.1.S1_at     | LOC12705               | PLA1A                 | 1.93E-07             | -1.11 | 1.32  | 2.01   | 1.05   | -1.15  | -1.03   | phospholipase a1 member a                                                         |
| MmuSTS.4033.1.S1_at     | TLR5                   | TLR5                  | 0.000129629          | 1.02  | 1.29  | 2.01   | 1.02   | -1.11  | -1.76   | tol-like receptor 5                                                               |
| MmuSTS.864.1.S1_at      | LOC710375              | LGALS8                | 8.67E-08             | -1.02 | 2.05  | 1.95   | 1.17   | 1.05   | -1.04   | lectin, galactoside-binding, soluble, 8 (galectin 8)                              |
| MmuqDNA.13798.1.S1_s_at | LOC711784              | TRAF1                 | 6.12E-06             | 1.13  | 2.04  | 1.94   | 1.21   | 1.08   | 1.10    | traf-type zinc finger domain containing 1                                         |
| MmuqDNA.228.1.S1_at     | LOC708518              | C6ORF192              | 4.70E-05             | 1.31  | 2.41  | 1.91   | 1.65   | -1.00  | -1.02   | chromosome 6 open reading frame 192                                               |
| MmuqDNA.11097.1.S1_at   | LOC704579              | SRGAP2                | 2.71E-06             | 1.09  | 2.04  | 1.91   | 1.01   | 1.16   | 1.20    | slit-robo rho gtpase activating protein 2                                         |
| MmuqDNA.25587.1.S1_at   | LOC693561              | PI4KB                 | 2.00E-05             | 1.28  | 2.22  | 1.90   | 1.75   | 1.06   | -1.00   | phosphatidylinositol 4-kinase type 2 beta                                         |
| Mmu.10941.2.S1_at       | LOC712466              | LOC712466             | 0.0168533            | 1.54  | 2.10  | 1.86   | 1.47   | 1.13   | 1.07    | ---                                                                               |
| MmuqDNA.494.1.S1_at     | ---                    | RAB8A                 | 0.00291481           | 1.36  | 2.29  | 1.85   | 1.34   | 1.16   | 1.20    | rab8a, member ras oncogene family                                                 |
| Mmu.16290.1.S1_at       | LOC722935              | PDC3L                 | 0.000141681          | 1.21  | 3.12  | 1.84   | 1.81   | 1.10   | 1.08    | phosducin-like 3                                                                  |
| MmuqDNA.35036.1.S1_at   | ---                    | PHACTR2               | 0.00420145           | 1.07  | 3.66  | 1.79   | 1.50   | 1.33   | -1.07   | phosphatase and actin regulator 2                                                 |
| MmuqDNA.30129.1.S1_at   | TNFSF10                | TNFSF10               | 0.00054178           | -1.25 | 2.38  | 1.76   | 1.35   | 1.00   | -1.85   | tumor necrosis factor (ligand) superfamily, member 10                             |
| MmuqDNA.28010.1.S1_at   | LOC710375              | LGALS8                | 4.79E-05             | -1.02 | 2.17  | 1.76   | 1.06   | 1.03   | -1.11   | lectin, galactoside-binding, soluble, 8 (galectin 8)                              |
| MmuqDNA.31377.1.S1_s_at | LOC706586              | CASP1                 | 0.000193287          | 1.51  | 2.41  | 1.71   | 1.99   | 1.10   | 1.03    | caspase 1, apoptosis-related cysteine peptidase (interleukin 1, beta, convertase) |
| MmuqDNA.27312.1.S1_at   | LOC709414              | ANKMY2                | 1.33E-05             | 1.17  | 2.14  | 1.69   | 1.52   | 1.05   | -1.08   | ankyrin repeat and myrd domain containing 2                                       |
| MmuqDNA.1595.1.S1_at    | ---                    | NTSC                  | 0.000155709          | 1.31  | 2.22  | 1.64   | 1.74   | 1.07   | -1.27   | 5', 3'-nucleotidase, cytosolic                                                    |
| MmuqDNA.34184.1.S1_at   | LOC722935              | TMEM123               | 0.00266949           | 1.29  | 2.48  | 1.62   | 1.79   | 1.14   | 1.11    | transmembrane protein 123                                                         |
| MmuqDNA.2078.1.S1_at    | ---                    | SMCHD1                | 0.001154             | 1.36  | 2.36  | 1.61   | 1.43   | 1.13   | 1.01    | structural maintenance of chromosomes flexible hinge domain containing 1          |
| MmuqDNA.12043.1.S1_at   | ---                    | SAMD9L                | 0.00034177           | -1.23 | 1.89  | 1.57   | 1.52   | 1.26   | 2.38    | sterile alpha motif domain containing 9-like                                      |
| MmuqDNA.22862.1.S1_at   | ---                    | PQR8                  | 4.54E-07             | 1.03  | 2.05  | 1.55   | 1.07   | 1.02   | 1.04    | progesterin and adipoq receptor family member viii                                |
| MmuqDNA.4665.1.S1_s_at  | FAS                    | FAS                   | 0.00513186           | 1.34  | 2.17  | 1.51   | 1.60   | 1.11   | 1.07    | fas (tnf receptor superfamily, member 6)                                          |
| MmuqDNA.508.1.S1_at     | CHMP5                  | CHMP5                 | 1.37E-05             | 1.27  | 2.52  | 1.45   | 1.73   | 1.07   | -1.22   | chromatin modifying protein 5                                                     |
| MmuqDNA.10394.1.S1_at   | ---                    | RNASEL                | 0.00611785           | 1.49  | 2.08  | 1.45   | 1.30   | 1.28   | 1.02    | ribonuclease l (2', 5'-oligoadenylate synthetase-dependent)                       |
| MmuqDNA.13052.1.S1_at   | LOC705017              | PIK3AP1               | 0.00010622           | 1.19  | 2.07  | 1.44   | 1.14   | 1.06   | -1.03   | phosphoinositide-3-kinase adaptor protein 1                                       |
| Mmu.11047.2.S1_s_at     | LOC711303              | LOC711303             | 0.00996233           | -1.16 | 1.10  | 1.41   | 4.40   | 2.44   | 1.03    | ---                                                                               |
| MmuqDNA.2164.1.S1_at    | LOC708293              | DDX10                 | 7.42E-06             | -1.18 | 1.02  | 1.32   | 3.80   | 2.08   | 1.16    | dead (asp-glu-ala-asp) box polypeptide 10                                         |
| MmuqDNA.42067.1.S1_at   | LOC701100              | UBE2J1                | 0.00760671           | 1.02  | 1.16  | 1.29   | 2.34   | 1.31   | 1.09    | ubiquitin-conjugating enzyme e2, j1 (ubc6 homolog, yeast)                         |
| MmuqDNA.3247.1.S1_at    | LOC704341              | HIST2H4B              | 0.000920491          | 1.31  | 1.23  | 1.27   | 3.22   | 1.96   | 1.52    | h4 histone, family 2                                                              |
| MmuqDNA.3247.1.S1_s_at  | LOC704341              | HIST2H4B              | 0.000122818          | 1.05  | 1.11  | 1.26   | 2.25   | 1.62   | 1.26    | h4 histone, family 2                                                              |
| MmuqDNA.4348.1.S1_at    | IGHG1 // LOC71130      | IGHG1                 | 0.000313979          | -1.22 | 1.06  | 1.26   | 5.77   | 2.81   | 1.06    | immunoglobulin heavy constant gamma 1 (g1m marker)                                |
| MmuqDNA.1283.1.S1_at    | LOC711236              | DTL                   | 3.85E-06             | 1.23  | 1.50  | 1.25   | 3.09   | 1.57   | 1.11    | denticles homolog (drosophila)                                                    |
| MmuqDNA.15862.1.S1_at   | LOC697324              | CKS2                  | 2.75E-05             | 1.05  | -1.10 | 1.25   | 4.38   | 1.68   | -1.19   | cdc28 protein kinase regulator subunit 2                                          |
| MmuqDNA.11614.1.S1_at   | LY96                   | LY96                  | 0.000441484          | 1.31  | 1.32  | 1.23   | 1.49   | 1.13   | 2.18    | lymphocyte antigen 96                                                             |
| MmuqDNA.14099.1.S1_at   | FDIA5                  | FDIA5                 | 9.22E-06             | 1.07  | -1.01 | 1.22   | 2.21   | 1.51   | 1.26    | protein disulfide isomerase family a, member 5                                    |
| MmuqDNA.32941.1.S1_at   | LOC711569              | C16ORF75              | 0.00456631           | -1.08 | 2.21  | 1.21   | 2.07   | -1.14  | -1.34   | hypothetical protein mgc24665                                                     |
| MmuqDNA.34901.1.S1_at   | SDF2L1                 | SDF2L1                | 0.314152             | 1.54  | 1.32  | 1.18   | 2.07   | 1.64   | 1.35    | stromal cell-derived factor 2-like 1                                              |
| MmuqDNA.2164.1.S1_s_at  | LOC708293              | DDX10                 | 0.000944551          | 1.12  | 1.16  | 1.17   | 2.41   | 1.83   | 1.28    | dead (asp-glu-ala-asp) box polypeptide 10                                         |
| MmuqDNA.24653.1.S1_at   | LOC708576              | HMMR                  | 4.11E-06             | -1.07 | -1.07 | 1.17   | 2.65   | 1.28   | -1.05   | hyaluronan-mediated motility receptor (harmn)                                     |
| MmuqDNA.3276.1.S1_at    | LOC70582               | RRM2                  | 8.50E-08             | -1.33 | -1.19 | 1.14   | 4.82   | 2.31   | 1.18    | ribonucleotide reductase m2 polypeptide                                           |
| MmuqDNA.12895.1.S1_s_at | LOC693572              | MGC29506              | 0.000341322          | -1.09 | -1.05 | 1.13   | 3.56   | 1.79   | 1.03    | proapoptotic caspase adaptor protein                                              |
| Mmu.15507.1.S1_x_at     | ---                    | IMPACT                | 0.000124248          | -1.21 | 1.02  | 1.11   | 2.04   | 1.41   | -1.02   | impact homolog (mouse)                                                            |
| MmuqDNA.911.1.S1_at     | LOC695383              | ALDH9A1               | 0.00403658           | 1.18  | 1.12  | 1.11   | 2.37   | 1.43   | 1.07    | aldehyde dehydrogenase 9 family, member a1                                        |
| MmuqDNA.6277.1.S1_at    | LOC708293              | BUB1                  | 4.13E-05             | 1.15  | 1.21  | 1.11   | 2.29   | 1.96   | 1.36    | ubiquitin-uninhibited by benzimidazoles 1 homolog (yeast)                         |
| MmuqDNA.31059.1.S1_at   | PTTG1                  | PTTG1                 | 0.000101362          | 1.22  | 1.05  | 1.09   | 2.82   | 1.95   | 1.43    | pituitary tumor-forming 1                                                         |
| MmuqDNA.18794.1.S1_at   | ---                    | CDC20                 | 3.23E-05             | -1.02 | 1.10  | 1.08   | 2.51   | 1.82   | 1.29    | cdc20 cell division cycle 20 homolog (s. cerevisiae)                              |
| MmuqDNA.12189.1.S1_at   | LOC707717              | NME1                  | 0.000981783          | 1.34  | 1.08  | 1.08   | 2.45   | 1.59   | 1.18    | non-metastatic cells 1, protein (m23a) expressed in                               |
| MmuqDNA.39863.1.S1_at   | ---                    | C18ORF24              | 0.00728521           | 1.18  | 1.19  | 1.06   | 2.55   | 1.71   | 1.27    | chromosome 18 open reading frame 24                                               |
| MmuqDNA.4685.1.S1_at    | TYMS                   | TYMS                  | 1.58E-06             | 1.14  | 1.00  | 1.06   | 3.43   | 2.65   | 1.23    | thymidylate synthetase                                                            |
| MmuqDNA.25384.1.S1_at   | UBE2C                  | UBE2C                 | 1.65E-07             | -1.12 | -1.05 | 1.05   | 2.99   | 1.95   | 1.28    | ubiquitin-conjugating enzyme e2c                                                  |
| MmuqDNA.7056.1.S1_s_at  | LOC701579              | UCHL1                 | 6.51E-05             | -1.01 | 1.11  | 1.04   | 2.82   | 1.56   | 1.16    | ubiquitin carboxyl-terminal esterase f1 (ubiquitin thiolesterase)                 |
| MmuqDNA.35877.1.S1_s_at | LOC700659              | ARMET                 | 0.00453604           | 1.30  | 1.12  | 1.03   | 2.10   | 1.42   | 1.23    | arginine-rich, mutated in early stage tumors                                      |
| MmuqDNA.22078.1.S1_at   | LOC693572              | MGC29506              | 0.000237491          | -1.01 | -1.05 | 1.01   | 5.43   | 2.50   | 1.00    | proapoptotic caspase adaptor protein                                              |
| MmuqDNA.4124.1.S1_at    | LOC721995              | CDC45                 | 2.51E-05             | -1.01 | 1.16  | 1.00   | 2.04   | 1.55   | 1.14    | cell division cycle associated 5                                                  |
| MmuqDNA.38781.1.S1_at   | LOC698390              | LOC698390             | 0.000297984          | -1.13 | -1.01 | -1.03  | 7.79   | 2.09   | -1.10   | ---                                                                               |
| MmuqDNA.4085.1.S1_at    | LOC700589              | CCNE1                 | 0.000866619          | 1.10  | 1.05  | -1.03  | 2.28   | 1.52   | 1.24    | cyclin e1                                                                         |
| MmuqDNA.40742.1.S1_at   | LOC702184              | CENB2                 | 3.91E-09             | 1.01  | 1.04  | -1.04  | 4.79   | 2.43   | 1.37    | cyclin b2                                                                         |
| Mmu.11962.1.S1_at       | LMAN1                  | LMAN1                 | 5.66E-06             | -1.13 | 1.05  | -1.05  | 3.10   | 1.41   | 1.17    | lectin, mannose-binding, 1                                                        |
| MmuqDNA.3327.1.S1_at    | OIP5                   | OIP5                  | 0.00109518           | 1.21  | 1.19  | -1.05  | 2.17   | 1.57   | 1.23    | appa interacting protein 5                                                        |
| MmuqDNA.30433.1.S1_at   | LOC716009              | SHCBP1                | 2.35E-07             | 1.00  | -1.14 | -1.05  | 5.70   | 1.82   | 1.08    | shc sh2-domain binding protein 1                                                  |
| MmuqDNA.5663.1.S1_at    | PLS3                   | PLS3                  | 6.47E-06             | 1.26  | -1.07 | -1.06  | 3.80   | 1.19   | -1.16   | plastin 3 (isoform)                                                               |
| Mmu.15443.1.S1_x_at     | ---                    | IGKV1-5               | 0.0403676            | -1.31 | 1.02  | -1.07  | 2.99   | 1.80   | -1.17   | immunoglobulin kappa variable 1-5                                                 |

| Affymetrix Probeset ID  | Affymetrix Gene Symbol | Corrected Gene Symbol | ANOVA (time) p-value | D3/D0 | D7/D0 | D10/D0 | D14/D0 | D30/D0 | D180/D0 | Gene Description                                                                         |
|-------------------------|------------------------|-----------------------|----------------------|-------|-------|--------|--------|--------|---------|------------------------------------------------------------------------------------------|
| MmugDNA.18451.1.S1_at   | LOC697635              | PRDX4                 | 0.000322219          | 1.25  | -1.09 | -1.07  | 2.97   | 1.47   | 1.17    | peroxiredoxin 4                                                                          |
| MmuSTS.3576.1.S1_at     | CCNA2                  | CCNA2                 | 0.000200609          | 1.16  | 1.05  | -1.07  | 2.96   | 1.80   | 1.26    | cyclin a2                                                                                |
| MmugDNA.2427.1.S1_at    | LOC705385              | TXNDC5                | 8.28E-05             | 1.03  | -1.20 | -1.08  | 3.01   | 1.63   | 1.16    | thioredoxin domain containing 5                                                          |
| MmugDNA.10778.1.S1_at   | LOC694877              | CDKN3                 | 6.78E-08             | 1.23  | 1.04  | -1.10  | 4.35   | 1.73   | 1.09    | cyclin-dependent kinase inhibitor 3 (cdk2-associated dual specificity phosphatase)       |
| Mmu.4398.1.S1_s_at      | CYCS                   | CYCS                  | 0.000104998          | 1.40  | 1.26  | -1.11  | 2.69   | 1.34   | 1.27    | cytchrome c, somatic                                                                     |
| MmugDNA.26033.1.S1_at   | LOC713624              | CENPN                 | 0.00011871           | 1.03  | 1.15  | -1.12  | 2.06   | 1.56   | 1.22    | chromosome 16 open reading frame 60                                                      |
| MmugDNA.32060.1.S1_s_at | ---                    | SPCS3                 | 0.000265663          | 1.42  | 1.29  | -1.13  | 2.59   | 1.40   | -1.12   | signal peptidase complex subunit 3 homolog (s. cerevisiae)                               |
| MmugDNA.38346.1.S1_at   | LOC711486 // LOC7      | PSAT1                 | 0.000181538          | 1.01  | -1.12 | -1.16  | 2.33   | 1.29   | 1.11    | phosphoserine aminotransferase 1                                                         |
| MmugDNA.28902.1.S1_at   | ---                    | GAB1                  | 1.88E-06             | 1.13  | 1.21  | -1.16  | 2.12   | 1.06   | -1.27   | grb2-associated binding protein 1                                                        |
| MmugDNA.12273.1.S1_at   | TOP2A                  | TOP2A                 | 3.25E-06             | -1.02 | -1.01 | -1.17  | 2.80   | 2.43   | 1.19    | topoisomerase (dna ii) alpha 170kda                                                      |
| MmugDNA.29315.1.S1_at   | LOC701888              | DEPDC1                | 5.18E-07             | -1.03 | -1.10 | -1.19  | 3.10   | 1.57   | -1.03   | dep domain containing 1                                                                  |
| MmugDNA.32729.1.S1_at   | MKI67                  | MKI67                 | 0.00263865           | 1.38  | 1.25  | -1.19  | 2.21   | 1.76   | 1.33    | antigen identified by monoclonal antibody ki-67                                          |
| MmugDNA.2975.1.S1_at    | LOC707526              | POLE2                 | 9.22E-08             | 1.14  | 1.12  | -1.20  | 2.35   | 1.56   | 1.12    | polymerase (dna directed), epsilon 2 (p59 subunit)                                       |
| MmugDNA.15250.1.S1_at   | ---                    | CENPA                 | 1.46E-06             | 1.07  | 1.11  | -1.22  | 3.01   | 1.80   | 1.21    | centromere protein a, 17kda                                                              |
| MmugDNA.31969.1.S1_at   | ---                    | RRM2                  | 2.30E-07             | 1.16  | 1.16  | -1.24  | 7.31   | 3.50   | 1.54    | ribonucleotide reductase m2 polypeptide                                                  |
| MmugDNA.1969.1.S1_at    | LOC714686              | MCM4                  | 0.0116049            | -1.03 | -1.04 | -1.24  | 2.01   | 1.44   | 1.00    | mcm4 minichromosome maintenance deficient 4 (s. cerevisiae)                              |
| MmugDNA.21403.1.S1_at   | LOC722088              | CDC43                 | 3.32E-05             | 1.09  | 1.01  | -1.24  | 2.11   | 1.26   | 1.09    | cell division cycle associated 3                                                         |
| MmuSTS.1653.1.S1_at     | TMPRSS3                | TMPRSS3               | 3.12E-05             | 1.28  | -1.06 | -1.24  | 2.15   | 1.56   | 1.16    | serine protease tadg12                                                                   |
| MmuSTS.1779.1.S1_at     | ---                    | NEK2                  | 4.23E-05             | 1.18  | 1.21  | -1.26  | 2.59   | 1.82   | 1.15    | nima (never in mitosis gene a)-related kinase 2                                          |
| MmugDNA.25197.1.S1_at   | ASPM                   | ASPM                  | 0.000173751          | 1.03  | 1.02  | -1.27  | 2.11   | 1.50   | 1.03    | hypothetical protein fl10517                                                             |
| MmuSTS.2700.1.S1_at     | LOC694423              | E2F7                  | 2.15E-06             | 1.15  | 1.08  | -1.27  | 2.59   | 1.57   | 1.26    | e2f transcription factor 7                                                               |
| MmugDNA.19738.1.S1_at   | S100A8                 | S100A8                | 0.000412813          | 1.33  | 1.17  | -1.28  | 1.81   | 1.13   | 2.26    | s100 calcium binding protein a8 (calgranulin a)                                          |
| MmugDNA.14075.1.S1_at   | RSN                    | BUB1B                 | 3.01E-06             | 1.08  | -1.00 | -1.29  | 2.30   | 1.66   | 1.30    | bub1 budding uninhibited by benzimidazoles 1 homolog beta (yeast)                        |
| MmugDNA.6706.1.S1_at    | LOC693531              | CKAP2                 | 9.79E-06             | 1.22  | 1.13  | -1.29  | 2.49   | 1.77   | 1.20    | cytoskeleton associated protein 2                                                        |
| MmugDNA.33823.1.S1_s_at | ---                    | KIAA0101              | 4.16E-08             | 1.00  | -1.02 | -1.30  | 5.24   | 2.69   | 1.27    | kiaa0101                                                                                 |
| MmugDNA.38956.1.S1_at   | ---                    | NUSAP1                | 5.92E-08             | -1.01 | -1.20 | -1.31  | 3.06   | 1.73   | 1.06    | nucleolar and spindle associated protein 1                                               |
| MmugDNA.14322.1.S1_at   | TFDP1                  | TFDP1                 | 9.46E-06             | 1.34  | -1.00 | -1.33  | 2.50   | 1.64   | 1.37    | transcription factor dp-1                                                                |
| MmugDNA.5873.1.S1_at    | ---                    | CEP55                 | 8.08E-06             | 1.04  | 1.08  | -1.36  | 2.47   | 1.63   | 1.18    | centrosomal protein 55kda                                                                |
| MmugDNA.12490.1.S1_at   | LOC702368              | E2F8                  | 0.000588763          | 1.04  | 1.04  | -1.37  | 2.20   | 1.28   | 1.16    | e2f transcription factor 8                                                               |
| MmugDNA.10186.1.S1_at   | ---                    | CASC5                 | 4.42E-07             | 1.24  | 1.01  | -1.39  | 2.24   | 1.55   | 1.33    | cancer susceptibility candidate 5                                                        |
| MmugDNA.21515.1.S1_at   | ---                    | PRC1                  | 1.31E-06             | -1.09 | -1.07 | -1.42  | 2.05   | 1.49   | -1.03   | protein regulator of cytokinesis 1                                                       |
| MmugDNA.11557.1.S1_at   | LOC715235              | NCAPG                 | 0.000129006          | 1.18  | 1.10  | -1.43  | 2.61   | 1.68   | 1.09    | chromosome condensation protein g                                                        |
| MmugDNA.5879.1.S1_s_at  | LOC706650              | IIGJ                  | 8.83E-06             | -1.20 | -1.51 | -1.47  | 4.07   | 1.72   | -1.23   | immunoglobulin j polypeptide, linker protein for immunoglobulin alpha and mu polypeptide |
| MmugDNA.5879.1.S1_at    | TNFRSF17               | TNFRSF17              | 3.09E-05             | -1.20 | -1.25 | -1.48  | 3.81   | 1.76   | -1.07   | tumor necrosis factor receptor superfamily, member 17                                    |
| MmuSTS.64.1.S1_at       | GMNN                   | GMNN                  | 0.000100361          | 1.27  | 1.08  | -1.49  | 2.91   | 1.46   | -1.07   | geminin, dna replication inhibitor                                                       |
| MmugDNA.19768.1.S1_at   | LOC709006              | CENPM                 | 3.58E-05             | -1.02 | -1.30 | -1.50  | 2.17   | 1.44   | 1.01    | chromosome 22 open reading frame 18                                                      |
| MmugDNA.13565.1.S1_at   | ---                    | KIF11                 | 2.20E-05             | 1.23  | 1.11  | -1.51  | 2.91   | 1.57   | 1.17    | kinesin family member 11                                                                 |
| MmugDNA.3201.1.S1_at    | ---                    | BACH2                 | 0.102604             | -1.34 | -1.63 | -1.61  | 2.42   | -1.41  | -1.17   | btb and cnc homology 1, basic leucine zipper transcription factor 2                      |
| MmugDNA.15585.1.S1_at   | HSF4                   | KIF15                 | 0.0050633            | 1.01  | -1.00 | -1.64  | 2.09   | 1.37   | 1.04    | kinesin family member 15                                                                 |
| MmuSTS.4157.1.S1_at     | LOC708574              | MAD2L1                | 6.23E-05             | 1.29  | 1.09  | -1.69  | 3.71   | 1.57   | 1.13    | mad2 mitotic arrest deficient-like 1 (yeast)                                             |
| MmugDNA.36434.1.S1_at   | ---                    | GZMA                  | 9.48E-06             | 1.34  | 1.48  | -1.75  | 6.15   | 1.70   | 1.00    | granzyme a (granzyme 1, cytotoxic t-lymphocyte-associated serine esterase 3)             |
| MmugDNA.3270.1.S1_at    | ---                    | YY1                   | 0.000315189          | 1.21  | -1.46 | -2.00  | -1.26  | -1.02  | 1.08    | yy1 transcription factor                                                                 |
| MmugDNA.41216.1.S1_at   | ---                    | NUDT3                 | 0.00179829           | 1.11  | -1.83 | -2.02  | -1.69  | -1.14  | -1.10   | alphosphoinositol polyphosphate phosphohydrolase                                         |
| MmugDNA.16608.1.S1_at   | ---                    | ELL2                  | 4.71E-05             | 1.36  | -1.43 | -2.03  | 1.46   | 1.06   | -1.04   | elongation factor, ma polymerase ii, 2                                                   |
| MmugDNA.10260.1.S1_at   | ---                    | GLS                   | 5.59E-05             | 1.13  | -2.18 | -2.05  | -1.26  | -1.12  | 1.17    | glutaminase                                                                              |
| MmugDNA.6211.1.S1_at    | ---                    | RPL35                 | 3.60E-05             | 1.35  | -1.60 | -2.05  | -1.41  | 1.07   | 1.07    | ribosomal protein l35                                                                    |
| MmugDNA.28893.1.S1_at   | ---                    | ANKRD28               | 0.00038183           | -1.05 | -1.47 | -2.08  | -1.19  | -1.17  | -1.26   | ankyrin repeat domain 28                                                                 |
| MmugDNA.4894.1.S1_at    | ---                    | GSK3B                 | 0.000461024          | 1.14  | -1.53 | -2.26  | -1.25  | -1.13  | -1.03   | glycogen synthase kinase 3 beta                                                          |
| MmugDNA.30329.1.S1_at   | PABPC4                 | PABPC4                | 0.00144785           | 1.28  | -1.63 | -2.31  | -1.25  | -1.10  | 1.16    | poly(a) binding protein, cytoplasmic 4 (inducible form)                                  |
| MmugDNA.13458.1.S1_at   | ---                    | NAP1L1                | 0.00112975           | -1.09 | -1.52 | -2.50  | -1.13  | -1.49  | -1.49   | nucleosome assembly protein 1-like 1                                                     |
| MmugDNA.12660.1.S1_at   | ---                    | FAM101B               | 0.0021112            | 1.16  | -1.67 | -2.58  | -1.45  | 1.05   | 1.13    | family with sequence similarity 101, member b                                            |
| MmugDNA.21136.1.S1_at   | LOC709607              | LTBP1                 | 0.0386331            | -1.13 | -1.82 | -2.59  | -2.19  | -1.57  | -1.62   | latent transforming growth factor beta binding protein 1                                 |
| MmugDNA.21770.1.S1_at   | LOC704306              | ---                   | 3.04E-08             | 1.06  | -1.12 | -2.64  | -1.19  | 1.10   | -1.06   | hypothetical protein LOC704306                                                           |
| MmugDNA.29351.1.S1_at   | LOC706985              | SNCA                  | 0.584629             | -1.73 | -1.56 | -2.64  | -1.28  | -1.49  | -1.38   | synuclein, alpha (non a4 component of amyloid precursor)                                 |
| MmugDNA.23281.1.S1_at   | ---                    | PELO                  | 0.00253498           | -1.10 | -2.39 | -2.72  | -1.62  | -1.70  | -1.39   | pro1770 protein                                                                          |
| MmugDNA.36739.1.S1_at   | ---                    | CR1                   | 1.17E-05             | 1.12  | -1.87 | -2.82  | -1.41  | -1.25  | -1.10   | complement component (3b/4b) receptor 1 (knops blood group)                              |
| MmugDNA.21074.1.S1_at   | LOC698536              | IRS2                  | 0.000103729          | 1.01  | -2.02 | -2.93  | -1.46  | -1.23  | -1.35   | insulin receptor substrate 2                                                             |
| MmuSTS.1081.1.S1_at     | PDE6H                  | PDE6H                 | 2.60E-05             | -1.06 | -2.62 | -3.03  | -2.21  | -1.52  | -1.45   | phosphodiesterase 6h, cgmp-specific, cone, gamma                                         |



**Supplemental Table S5.** 830 probesets determined to be differential after SIVmac239 infection of RMs in RNA from total blood. The Affymetrix Gene Symbol refers to the annotation provided by Affymetrix, Inc. for the Rhesus Genome Array (v.27), based on the Urhinge Rhesus Macaque genome Build #13. In cases of missing or provisional annotation, gene symbols were annotated from existing human orthologues based on the DAVID database and are listed in the Corrected Gene Symbol column. D0 columns refer to the linear ratio of average gene expression relative to pre-infected average values (red = ratios > +2-fold, green = ratios < -2-fold). Gene Descriptions were based off DAVID annotation where available or Affymetrix annotation.

| Affymetrix Probeset ID  | Affymetrix Gene Symbol | Corrected Gene Symbol | ANOVA (time) p-value | D10/D0 | D14/D0 | D30/D0 | CHRONIC/DO | Gene Description                                                       |
|-------------------------|------------------------|-----------------------|----------------------|--------|--------|--------|------------|------------------------------------------------------------------------|
| MmugDNA.17118.1.S1_at   | LOC700141              | ISG15                 | 4.46E-03             | 32.09  | 1.55   | 7.34   | 2.74       | interferon, alpha-inducible protein (clone ifi-15k)                    |
| MmuSTS.4748.1.S1_at     | --                     | USP18                 | 2.10E-04             | 28.95  | 3.91   | 5.12   | 3.46       | ubiquitin specific peptidase 18                                        |
| MmuSTS.1893.1.S1_s_at   | --                     | CXCL10                | 1.47E-07             | 19.89  | 2.57   | 3.40   | 2.16       | chemokine (c-x-c motif) ligand 10                                      |
| MmuSTS.4655.1.S1_at     | OAS1                   | OAS1                  | 3.25E-07             | 16.89  | 4.37   | 3.50   | 1.59       | 2',5'-oligoadenylate synthetase 1, 40/46kda                            |
| MmugDNA.35740.1.S1_at   | IFIT2                  | IFIT2                 | 2.93E-03             | 16.76  | 1.73   | 3.76   | 2.44       | interferon-induced protein with tetratricopeptide repeats 2            |
| MmugDNA.30775.1.S1_at   | LOC722182              | LOC722182             | 5.49E-04             | 15.82  | 2.51   | 3.77   | 1.43       | similar to HRAS-like suppressor 2                                      |
| MmugDNA.19594.1.S1_at   | LOC695344              | IFIT3                 | 7.09E-03             | 14.97  | 2.18   | 4.48   | 2.38       | interferon-induced protein with tetratricopeptide repeats 3            |
| MmuSTS.1612.1.S1_at     | LOC698943              | OASL                  | 5.36E-03             | 14.06  | 2.76   | 3.78   | 2.23       | 2'-5'-oligoadenylate synthetase-like                                   |
| MmugDNA.34026.1.S1_at   | LOC718510              | PLA2G4C               | 5.99E-06             | 13.76  | 1.79   | 2.22   | 1.96       | phospholipase a2, group i/c (cytosolic, calcium-independent)           |
| MmuSTS.2101.1.S1_at     | LOC702775              | RIN2                  | 8.68E-07             | 11.81  | 2.62   | 1.84   | 1.19       | ras and rab interactor 2                                               |
| Mmu.3779.1.S1_at        | LOC695344              | IFIT3                 | 1.18E-04             | 11.37  | 1.56   | 3.05   | 1.53       | interferon-induced protein with tetratricopeptide repeats 3            |
| MmugDNA.31670.1.S1_at   | PTPRA                  | FAM70A                | 1.33E-03             | 11.29  | 3.42   | 2.89   | 1.48       | family with sequence similarity 70, member a                           |
| MmugDNA.8486.1.S1_at    | LOC712401              | OAS2                  | 2.71E-03             | 11.10  | 2.17   | 3.32   | 2.09       | 2'-5'-oligoadenylate synthetase 2, 69/71kda                            |
| MmuSTS.603.1.S1_at      | LOC720054              | HSPA1B                | 5.23E-04             | 10.29  | 2.25   | 1.91   | 1.81       | heat shock 70kda protein 1a                                            |
| MmugDNA.23425.1.S1_at   | IL1RN                  | IL1RN                 | 2.20E-06             | 9.55   | 1.86   | 1.37   | 1.11       | interleukin 1 receptor antagonist                                      |
| MmuSTS.681.1.S1_at      | IL1RN                  | IL1RN                 | 1.43E-09             | 9.55   | 1.42   | 1.27   | 1.03       | interleukin 1 receptor antagonist                                      |
| MmugDNA.6512.1.S1_at    | LOC699458              | LOC26010              | 2.36E-06             | 9.07   | 4.00   | 3.31   | 1.36       | dna polymerase-transactivated protein 6                                |
| Mmu.11363.1.S1_at       | CXCL10                 | CXCL10                | 2.06E-08             | 8.99   | 1.66   | 1.72   | 1.44       | chemokine (c-x-c motif) ligand 10                                      |
| MmugDNA.11735.1.S1_at   | --                     | DDX58                 | 6.22E-03             | 8.45   | 1.74   | 2.68   | 2.00       | dead (asp-glu-ala-asp) box polypeptide 58                              |
| MmugDNA.20819.1.S1_s_at | LOC712342              | OAS3                  | 4.32E-03             | 8.38   | 2.08   | 2.80   | 1.73       | 2'-5'-oligoadenylate synthetase 3, 100kda                              |
| MmuSTS.4428.1.S1_at     | LOC702381              | IFI6                  | 1.98E-03             | 8.35   | 2.88   | 4.89   | 1.88       | interferon, alpha-inducible protein (clone ifi-6/16)                   |
| MmugDNA.19189.1.S1_at   | DDX58                  | DDX58                 | 4.50E-04             | 8.32   | 1.73   | 1.83   | 1.52       | dead (asp-glu-ala-asp) box polypeptide 58                              |
| MmuSTS.713.1.S1_at      | LOC697698              | TTL6                  | 5.13E-03             | 8.21   | 2.39   | 3.09   | 1.80       | Similar to tubulin tyrosine ligase-like family, member 6               |
| MmuSTS.1377.1.S1_at     | LOC695971              | BCL2L14               | 6.80E-05             | 8.13   | 3.83   | 2.95   | 1.54       | bcl2-like 14 (apoptosis facilitator)                                   |
| MmugDNA.43291.1.S1_at   | LOC712401              | OAS2                  | 2.74E-05             | 7.95   | 1.61   | 2.17   | 1.42       | 2'-5'-oligoadenylate synthetase 2, 69/71kda                            |
| Mmu.10088.2.S1_at       | MX2                    | MX2                   | 7.36E-03             | 7.94   | 1.98   | 2.58   | 2.18       | myxovirus (influenza virus) resistance 2 (mouse)                       |
| MmuSTS.713.1.S1_x_at    | LOC697698              | TTL6                  | 2.96E-03             | 7.89   | 2.25   | 2.59   | 1.73       | Similar to tubulin tyrosine ligase-like family, member 6               |
| MmuSTS.1580.1.S1_at     | --                     | IFIT5                 | 2.09E-03             | 7.77   | 2.17   | 2.37   | 1.81       | interferon-induced protein with tetratricopeptide repeats 5            |
| MmugDNA.30921.1.S1_at   | LOC705525              | HERC6                 | 8.90E-04             | 7.23   | 1.80   | 3.34   | 1.47       | hect domain and rd 6                                                   |
| MmugDNA.20634.1.S1_at   | LOC697698              | DHX58                 | 3.21E-03             | 7.13   | 2.07   | 2.47   | 1.63       | likely ortholog of mouse d11gpc2                                       |
| MmugDNA.29625.1.S1_at   | LOC699578              | IRF7                  | 4.78E-03             | 6.96   | 2.34   | 2.55   | 1.71       | interferon regulatory factor 7                                         |
| MmuSTS.1560.1.S1_at     | --                     | MGC20410              | 1.03E-05             | 6.92   | 2.90   | 1.70   | 1.26       | --                                                                     |
| MmuSTS.2010.1.S1_at     | PCDH20                 | PCDH20                | 1.35E-08             | 6.87   | 1.83   | 1.48   | 1.18       | protocadherin 20                                                       |
| MmugDNA.25674.1.S1_at   | LOC699580              | KCTD14                | 1.60E-04             | 6.83   | 5.45   | 2.19   | 1.20       | potassium channel tetramerisation domain containing 14                 |
| MmugDNA.1672.1.S1_at    | LOC694999              | TNFAIP6               | 1.47E-03             | 6.75   | 4.07   | 2.25   | 1.59       | tumor necrosis factor, alpha-induced protein 6                         |
| MmugDNA.41339.1.S1_at   | GCH1                   | GCH1                  | 5.60E-06             | 6.81   | 2.80   | 1.92   | 1.44       | GTP cyclohydrolase 1                                                   |
| MmuSTS.4660.1.S1_at     | LOC694999              | TNFAIP6               | 3.16E-03             | 5.94   | 3.66   | 2.26   | 1.54       | tumor necrosis factor, alpha-induced protein 6                         |
| MmugDNA.22278.1.S1_at   | --                     | DDX58                 | 5.91E-03             | 5.92   | 1.55   | 2.45   | 1.68       | dead (asp-glu-ala-asp) box polypeptide 58                              |
| MmugDNA.40942.1.S1_at   | --                     | SAMD4A                | 3.72E-05             | 5.83   | 2.45   | 1.52   | 1.37       | sterile alpha motif domain containing 4a                               |
| Mmu.11960.1.S1_at       | GBP1                   | GBP1                  | 6.62E-03             | 5.75   | 1.76   | 2.11   | 1.96       | guanylate binding protein 1, interferon-inducible, 67kda               |
| MmugDNA.19665.1.S1_s_at | IFITM3                 | IFITM3                | 4.25E-04             | 5.64   | 2.55   | 1.29   | 1.16       | interferon induced transmembrane protein 3 (1-8U)                      |
| MmugDNA.20352.1.S1_at   | --                     | DDX60L                | 2.59E-04             | 5.30   | 1.26   | 1.53   | 1.42       | --                                                                     |
| MmugDNA.25492.1.S1_s_at | LOC719412              | LOC719412             | 2.32E-03             | 5.25   | 3.75   | 2.88   | 1.75       | similar to Probable DNA dC->dU-editing enzyme APOBEC-3A (Phorbol-in-1) |
| MmugDNA.14074.1.S1_at   | --                     | --                    | 2.14E-05             | 5.25   | 2.02   | 2.31   | 1.21       | --                                                                     |
| Mmu.865.1.S1_at         | OAS1                   | OAS1                  | 1.10E-09             | 5.10   | 1.60   | 1.80   | 1.16       | 2'-5'-oligoadenylate synthetase 1, 40/46kda                            |
| MmugDNA.36297.1.S1_at   | IFIH1                  | IFIH1                 | 1.58E-04             | 5.02   | 1.56   | 2.06   | 1.48       | interferon induced with helicase c domain 1                            |
| Mmu.11961.1.S1_at       | GBP1                   | GBP1                  | 5.57E-04             | 4.94   | 1.33   | 1.96   | 1.73       | guanylate binding protein 1, interferon-inducible, 67kda               |
| MmuAffx.23.23.S1_s_at   | S100P                  | S100P                 | 1.02E-03             | 4.93   | 5.31   | 2.65   | 1.26       | S100 calcium binding protein P                                         |
| MmuSTS.3702.1.S1_at     | --                     | EIF2AK2               | 1.48E-04             | 4.91   | 1.65   | 2.20   | 1.36       | eukaryotic translation initiation factor 2-alpha kinase 2              |
| MmugDNA.13099.1.S1_at   | --                     | --                    | 1.88E-08             | 4.89   | 1.02   | 1.45   | 1.46       | --                                                                     |
| MmugDNA.19136.1.S1_at   | --                     | CCDC75                | 4.46E-03             | 4.89   | 1.72   | 2.30   | 1.49       | coiled-coil domain containing 75                                       |
| MmugDNA.11328.1.S1_at   | ATF3                   | ATF3                  | 4.51E-06             | 4.82   | 1.18   | 1.35   | 1.08       | activating transcription factor 3                                      |
| MmuSTS.2397.1.S1_s_at   | LOC694884              | GBP2                  | 6.32E-03             | 4.81   | 2.08   | 1.78   | 1.66       | guanylate binding protein 2, interferon-inducible                      |
| MmugDNA.8379.1.S1_at    | LOC715462              | SLFN5                 | 1.38E-04             | 4.70   | 1.62   | 1.97   | 1.18       | likely ortholog of mouse schlafen 5                                    |
| MmugDNA.15907.1.S1_at   | --                     | --                    | 3.98E-04             | 4.74   | 2.81   | 1.71   | 1.45       | --                                                                     |
| MmugDNA.3353.1.S1_at    | LOC700215              | LOC700215             | 2.67E-03             | 4.72   | 1.85   | 1.45   | 1.32       | similar to NmrA-like family domain containing 1                        |
| MmugDNA.33242.1.S1_at   | --                     | --                    | 5.34E-04             | 4.69   | 2.48   | 2.05   | 1.41       | --                                                                     |
| MmuSTS.2728.1.S1_at     | LOC706004              | GCN5L2                | 1.43E-07             | 4.50   | 1.17   | 1.15   | 1.06       | gcn5 general control of amino-acid synthesis 5-like 2 (yeast)          |
| MmugDNA.3747.1.S1_at    | LOC693771              | LOC693771             | 6.14E-04             | 4.48   | 2.62   | 1.76   | 1.40       | similar to Transmembrane protein 51                                    |
| MmuSTS.602.1.S1_at      | LOC715638              | HSPA1A                | 1.91E-03             | 4.32   | 1.90   | 1.69   | 1.21       | similar to Heat shock 70 kDa protein 1 (HSP70.1) (HSP70.1/HSP70.2)     |
| MmugDNA.3485.1.S1_at    | --                     | EPSTI1                | 1.53E-04             | 4.32   | 1.67   | 1.83   | 1.42       | epithelial stromal interaction 1 (breast)                              |
| MmugDNA.38053.1.S1_at   | TFPI2                  | TFPI2                 | 8.10E-04             | 4.27   | 2.18   | 1.56   | 1.07       | tissue factor pathway inhibitor 2                                      |
| MmugDNA.38530.1.S1_at   | LOC717470              | SIGLEC1               | 4.84E-06             | 4.28   | 1.71   | 2.20   | 1.12       | sialic acid binding ig-like lectin 1, sialoadhesin                     |
| MmugDNA.2176.1.S1_at    | ISG20                  | ISG20                 | 1.70E-06             | 4.17   | 1.73   | 1.51   | 1.50       | interferon stimulated exonuclease gene 20kda                           |
| MmugDNA.40434.1.S1_at   | LOC714928              | LOC714928             | 2.03E-03             | 4.13   | 1.72   | 1.84   | 1.61       | similar to ataxin-1 ubiquitin-like interacting protein                 |
| MmugDNA.5120.1.S1_at    | --                     | --                    | 2.06E-05             | 4.03   | 1.97   | 1.52   | 1.16       | --                                                                     |
| MmuSTS.1778.1.S1_at     | SCIN                   | SCIN                  | 7.29E-03             | 4.02   | 4.29   | 1.67   | 1.04       | scinderin                                                              |
| MmuSTS.2042.1.S1_at     | --                     | PML                   | 4.09E-05             | 4.01   | 1.63   | 1.95   | 1.32       | promyelocytic leukemia                                                 |
| MmugDNA.35760.1.S1_at   | LOC708404              | RTP4                  | 8.63E-05             | 3.94   | 1.93   | 1.74   | 1.35       | receptor transporter protein 4                                         |
| MmugDNA.31716.1.S1_s_at | LOC715633              | LOC715633             | 6.58E-04             | 3.85   | 3.21   | 1.66   | 1.48       | similar to molybdenum cofactor sulfurase                               |
| MmugDNA.17877.1.S1_s_at | --                     | PML                   | 1.44E-05             | 3.84   | 1.39   | 1.58   | 1.30       | promyelocytic leukemia                                                 |
| MmugDNA.27480.1.S1_at   | LOC710375              | LGALS8                | 3.99E-05             | 3.83   | 1.46   | 1.96   | 1.33       | lectin, galactoside-binding, soluble, 8 (galectin 8)                   |
| MmugDNA.17449.1.S1_at   | LOC704124              | TFEC                  | 5.09E-03             | 3.82   | 2.34   | 1.88   | 2.01       | transcription factor ec                                                |
| MmugDNA.27315.1.S1_at   | --                     | SAMD9                 | 4.65E-03             | 3.76   | 1.73   | 1.83   | 1.52       | sterile alpha motif domain containing 9                                |
| MmugDNA.3158.1.S1_at    | CCL8                   | CCL8                  | 2.36E-07             | 3.75   | 1.32   | 1.28   | 1.02       | chemokine (c-c motif) ligand 8                                         |
| MmugDNA.8115.1.S1_at    | --                     | RNF213                | 5.72E-03             | 3.75   | 1.77   | 1.87   | 1.46       | chromosome 17 open reading frame 27                                    |
| MmuSTS.1439.1.S1_at     | LGALS3BP               | LGALS3BP              | 5.48E-04             | 3.72   | 1.85   | 1.88   | 1.49       | lectin, galactoside-binding, soluble, 3 binding protein                |
| MmugDNA.1812.1.S1_at    | LOC696090              | ZBP1                  | 4.29E-07             | 3.71   | 2.28   | 1.73   | 1.17       | z-dna binding protein 1                                                |
| MmugDNA.34497.1.S1_at   | LOC715706              | LOC715706             | 3.51E-04             | 3.73   | 1.73   | 1.34   | -1.06      | similar to schlafen family member 13                                   |
| MmugDNA.20774.1.S1_at   | --                     | CD274                 | 2.45E-03             | 3.70   | 1.34   | 1.08   | 1.38       | cd274 antigen                                                          |
| MmugDNA.5885.1.S1_at    | LOC701429              | LOC701429             | 1.01E-06             | 3.69   | 1.38   | 1.21   | 1.00       | similar to 40S ribosomal protein S17                                   |
| MmugDNA.27480.1.S1_s_at | LOC710375              | LGALS8                | 3.84E-04             | 3.68   | 1.49   | 1.87   | 1.37       | lectin, galactoside-binding, soluble, 8 (galectin 8)                   |
| MmugDNA.33882.1.S1_at   | --                     | TRIM14                | 1.44E-03             | 3.66   | 2.10   | 1.79   | 1.18       | tripartite motif-containing 14                                         |
| MmugDNA.13395.1.S1_at   | LOC719253              | IFI16                 | 2.30E-04             | 3.65   | 1.61   | 1.55   | 1.24       | interferon, gamma-inducible protein 16                                 |
| Mmu.11584.1.S1_at       | LOC719092              | BST2                  | 6.02E-06             | 3.59   | 2.08   | 1.51   | 1.16       | bone marrow stromal cell antigen 2                                     |
| MmugDNA.22032.1.S1_at   | --                     | --                    | 1.27E-04             | 3.59   | -1.16  | 1.42   | 1.19       | --                                                                     |
| MmugDNA.25587.1.S1_at   | LOC693561              | PI4K2B                | 1.06E-05             | 3.54   | 1.50   | 1.58   | 1.35       | phosphatidylinositol 4-kinase type 2 beta                              |
| MmugDNA.8893.1.S1_at    | LOC715369              | CORO2A                | 1.63E-04             | 3.51   | 2.40   | 1.31   | -1.20      | coronin, actin binding protein, 2a                                     |
| MmugDNA.38006.1.S1_s_at | S100P                  | S100P                 | 1.40E-03             | 3.48   | 4.15   | 1.93   | 1.31       | S100 calcium binding protein P                                         |

| Affymatrix Probeset ID  | Affymatrix Gene Symbol | Corrected Gene Symbol | ANOVA (time) P-value | D10/D0 | D14/D0 | D30/D0 | CHRONIC/DO | Gene Description                                                                  |
|-------------------------|------------------------|-----------------------|----------------------|--------|--------|--------|------------|-----------------------------------------------------------------------------------|
| MmuAffx.10.1.A1_x_at    | ---                    | ---                   | 9.19E-04             | 3.48   | 1.68   | 1.76   | 1.21       | ---                                                                               |
| MmugDNA.32046.1.S1_at   | LOC720688              | KLHD7C7B              | 7.69E-05             | 3.47   | 2.01   | 2.10   | 1.24       | kelch domain containing 7b                                                        |
| MmugDNA.32611.1.S1_at   | LOC715462              | SLFN5                 | 3.77E-03             | 3.45   | 1.75   | 1.44   | 1.14       | likely ortholog of mouse schlafen 5                                               |
| MmugDNA.9803.1.S1_at    | ---                    | PML                   | 3.64E-04             | 3.44   | 1.40   | 1.59   | 1.36       | promyelocytic leukemia                                                            |
| MmugDNA.18194.1.S1_at   | ---                    | ---                   | 1.27E-04             | 3.40   | 1.51   | 1.07   | 1.36       | ---                                                                               |
| MmugDNA.38196.1.S1_at   | ---                    | STAT2                 | 4.17E-03             | 3.39   | 1.69   | 1.70   | 1.38       | signal transducer and activator of transcription 2, 113kda                        |
| Mmu.12633.1.S1_at       | LOC715591              | PARP14                | 7.08E-03             | 3.37   | 1.23   | 1.56   | 1.60       | poly (adp-ribose) polymerase family, member 14                                    |
| MmugDNA.23367.1.S1_at   | LOC715967              | LOC715967             | 1.05E-03             | 3.36   | 1.68   | 1.86   | 1.37       | hypothetical protein LOC715967                                                    |
| MmugDNA.28010.1.S1_at   | LOC710375              | LGALS8                | 2.48E-03             | 3.35   | 1.25   | 1.68   | 1.15       | lectin, galactoside-binding, soluble, 8 (galectin 8)                              |
| MmugDNA.42826.1.S1_at   | LOC710406              | C21ORF91              | 7.26E-07             | 3.34   | 1.36   | 1.30   | 1.28       | chromosome 21 open reading frame 91                                               |
| MmugDNA.8672.1.S1_at    | LOC704374              | SDC3                  | 2.02E-06             | 3.32   | 1.30   | 1.60   | 1.18       | syndecan 3 (n-syndecan)                                                           |
| MmugDNA.42778.1.S1_at   | LOC711660              | PARP12                | 1.27E-04             | 3.32   | 1.47   | 1.39   | 1.22       | poly (adp-ribose) polymerase family, member 12                                    |
| MmugDNA.28698.1.S1_x_at | ---                    | SAMD9                 | 4.10E-03             | 3.32   | 1.55   | 1.76   | 1.31       | sterile alpha motif domain containing 9                                           |
| MmugDNA.13723.1.S1_at   | LOC714371              | LOC714371             | 2.93E-04             | 3.32   | 1.66   | 2.04   | 1.09       | Similar to polypeptide N-acetylgalactosaminyltransferase 2                        |
| MmuSTS.1283.1.S1_at     | LOC711236              | DTL                   | 2.43E-03             | 3.31   | 6.52   | 2.67   | 1.86       | denticleless homolog (drosophila)                                                 |
| MmugDNA.28896.1.S1_at   | LOC717665              | C6ORF150              | 1.41E-03             | 3.29   | 1.53   | 1.30   | 1.47       | chromosome 6 open reading frame 150                                               |
| MmugDNA.7800.1.S1_at    | ---                    | ---                   | 2.60E-04             | 3.29   | 1.44   | 1.47   | 1.36       | ---                                                                               |
| MmugDNA.28698.1.S1_at   | ---                    | SAMD9                 | 4.54E-03             | 3.29   | 1.52   | 1.80   | 1.32       | sterile alpha motif domain containing 9                                           |
| MmugDNA.22615.1.S1_at   | ---                    | ---                   | 5.89E-05             | 3.29   | 1.01   | 1.52   | 1.23       | ---                                                                               |
| MmunewRS.843.1.S1_at    | LOC721635              | LOC721635             | 2.19E-05             | 3.29   | 1.20   | 1.32   | 1.22       | hypothetical protein LOC721635                                                    |
| MmugDNA.10435.1.S1_at   | LOC693306              | LOC693306             | 6.33E-05             | 3.29   | 1.19   | 1.24   | 1.21       | similar to family with sequence similarity 46, member A                           |
| MmugDNA.13723.1.S1_s_at | LOC714371              | LOC714371             | 8.64E-04             | 3.19   | 1.56   | 1.87   | 1.06       | Similar to polypeptide N-acetylgalactosaminyltransferase 2                        |
| MmugDNA.9534.1.S1_at    | LOC715706              | LOC715706             | 6.95E-04             | 3.19   | 1.50   | 1.09   | 1.03       | similar to schlafen family member 13                                              |
| MmuSTS.2890.1.S1_at     | ---                    | TRIM14                | 1.09E-03             | 3.17   | 1.68   | 1.47   | 1.19       | tripartite motif-containing 14                                                    |
| MmugDNA.14170.1.S1_at   | ---                    | ZCCHC2                | 7.05E-03             | 3.17   | 1.29   | 1.39   | 1.34       | zinc finger, cchc domain containing 2                                             |
| MmugDNA.38074.1.S1_at   | ---                    | ---                   | 4.96E-05             | 3.17   | 1.20   | 1.18   | -1.14      | ---                                                                               |
| MmugDNA.23196.1.S1_at   | ---                    | STAT1                 | 3.62E-04             | 3.15   | 1.19   | 1.47   | 1.33       | signal transducer and activator of transcription 1, 91kda                         |
| MmugDNA.12946.1.S1_at   | ---                    | PML                   | 9.95E-04             | 3.14   | 1.49   | 1.55   | 1.45       | promyelocytic leukemia                                                            |
| MmuSTS.549.1.S1_at      | BARD1                  | BARD1                 | 1.87E-04             | 3.13   | 2.64   | 1.70   | 1.42       | BRCA1 associated RING domain 1                                                    |
| MmugDNA.4351.1.S1_at    | ---                    | ---                   | 3.66E-07             | 3.13   | 1.15   | 1.13   | -1.04      | ---                                                                               |
| MmugDNA.19126.1.S1_at   | ---                    | ---                   | 6.06E-03             | 3.12   | 1.34   | 1.27   | 1.05       | ---                                                                               |
| MmugDNA.3349.1.S1_at    | LOC713715              | CCR2L2                | 4.33E-03             | 3.11   | 1.29   | 1.37   | 1.14       | chemokine (c-c motif) receptor-like 2                                             |
| MmuSTS.3569.1.S1_at     | ---                    | ---                   | 3.27E-06             | 3.11   | 1.08   | 1.31   | 1.14       | ---                                                                               |
| MmugDNA.9650.1.S1_at    | LOC714914              | DTX3L                 | 5.72E-04             | 3.10   | 1.36   | 1.51   | 1.38       | deltex 3-like (drosophila)                                                        |
| Mmu.13018.2.S1_a_at     | TRIM5                  | TRIM5                 | 1.79E-04             | 3.10   | 1.18   | 1.31   | 1.31       | tripartite motif-containing 5                                                     |
| MmugDNA.1805.1.S1_at    | ---                    | ---                   | 8.45E-04             | 3.09   | 1.52   | -1.04  | 1.34       | ---                                                                               |
| MmugDNA.7109.1.S1_at    | SP100                  | SP100                 | 5.42E-04             | 3.09   | 1.54   | 1.54   | 1.21       | SP100 nuclear antigen                                                             |
| MmugDNA.28813.1.S1_at   | LOC702789              | LOC702789             | 1.28E-03             | 3.08   | 1.60   | 1.92   | 1.38       | similar to phorbol-12-myristate-13-acetate-induced protein 1                      |
| MmugDNA.10434.1.S1_at   | LOC693306              | LOC693306             | 7.28E-04             | 3.02   | 1.29   | 1.24   | 1.31       | similar to family with sequence similarity 46, member A                           |
| MmunewRS.20.1.S1_at     | LOC719253              | IFI16                 | 4.48E-03             | 3.01   | 1.76   | 1.22   | 1.60       | interferon, gamma-inducible protein 16                                            |
| MmuSTS.4763.1.S1_at     | LOC722740              | FBXO6                 | 2.41E-04             | 2.97   | 2.24   | 1.57   | 1.28       | -box protein 6                                                                    |
| MmugDNA.40394.1.S1_at   | LY6E                   | LY6E                  | 2.17E-04             | 2.97   | 1.59   | 1.50   | 1.49       | lymphocyte antigen 6 complex, locus e                                             |
| MmugDNA.8695.1.S1_at    | ---                    | CORO2A                | 4.81E-04             | 2.95   | 2.48   | 1.35   | -1.23      | coronin, actin binding protein, 2a                                                |
| MmugDNA.41833.1.S1_at   | LOC719092              | BST2                  | 4.17E-04             | 2.94   | 2.18   | 1.29   | 1.07       | bone marrow stromal cell antigen 2                                                |
| MmugDNA.19865.1.S1_x_at | IFITM3                 | IFITM3                | 1.07E-05             | 2.93   | 1.56   | 1.02   | 1.01       | interferon induced transmembrane protein 3 (1-8U)                                 |
| MmugDNA.15595.1.S1_at   | HTRA1                  | HTRA1                 | 1.58E-04             | 2.91   | 5.74   | 1.72   | 1.28       | HTRA serine peptidase 1                                                           |
| MmugDNA.269.1.S1_at     | ---                    | ---                   | 3.42E-05             | 2.91   | 1.19   | -1.04  | 1.07       | ---                                                                               |
| MmuSTS.4059.1.S1_at     | TRIM21                 | TRIM21                | 2.94E-07             | 2.84   | 1.31   | 1.40   | 1.20       | tripartite motif-containing 21                                                    |
| Mmu.4440.1.S1_at        | LOC693561              | PI4K2B                | 8.60E-07             | 2.82   | 1.14   | 1.21   | 1.25       | phosphatidylinositol 4-kinase type 2 beta                                         |
| MmugDNA.9495.1.S1_at    | ---                    | PHACTR2               | 1.35E-03             | 2.82   | 1.63   | 1.43   | 1.14       | phosphatase and actin regulator 2                                                 |
| Mmu.13989.1.S1_at       | LOC719212              | LOC719212             | 6.63E-06             | 2.81   | 1.76   | 1.42   | 1.32       | ---                                                                               |
| MmugDNA.11097.1.S1_at   | LOC704579              | SRGAP2                | 4.37E-04             | 2.81   | 1.15   | 1.30   | 1.61       | slit-roho rho gtpase activating protein 2                                         |
| MmugDNA.19098.1.S1_at   | ---                    | LOC100130123          | 7.57E-04             | 2.80   | 1.57   | 1.29   | 1.21       | ---                                                                               |
| MmuSTS.1185.1.S1_at     | LOC712705              | PLA1A                 | 3.58E-05             | 2.79   | 1.39   | 1.30   | 1.11       | phospholipase a1 member a                                                         |
| MmugDNA.7052.1.S1_at    | LOC705561              | UBE2L6                | 7.14E-05             | 2.79   | 1.72   | 1.47   | 1.27       | ubiquitin-conjugating enzyme e2l 6                                                |
| MmugDNA.42856.1.S1_at   | ---                    | ---                   | 2.05E-06             | 2.77   | 1.37   | 1.40   | 1.11       | ---                                                                               |
| MmugDNA.34787.1.S1_at   | HTRA1                  | HTRA1                 | 3.12E-05             | 2.76   | 4.27   | 1.69   | 1.16       | HTRA serine peptidase 1                                                           |
| MmugDNA.36766.1.S1_at   | TOR1B                  | TOR1B                 | 2.64E-03             | 2.75   | 1.74   | 1.44   | 1.41       | torsin family 1, member b (torsin b)                                              |
| MmugDNA.10146.1.S1_at   | LOC712588              | TRIM25                | 7.10E-03             | 2.75   | 1.51   | 1.44   | 1.41       | tripartite motif-containing 25                                                    |
| MmugDNA.9841.1.S1_at    | ---                    | ---                   | 3.87E-05             | 2.74   | 1.50   | 1.23   | 1.15       | ---                                                                               |
| MmugDNA.22391.1.S1_at   | LOC715533              | LOC715533             | 1.65E-07             | 2.73   | 1.32   | 1.09   | 1.28       | similar to poly (ADP-ribose) polymerase family, member 15                         |
| MmugDNA.12043.1.S1_at   | ---                    | SAMD9L                | 1.05E-03             | 2.72   | 1.56   | 1.20   | 1.37       | sterile alpha motif domain containing 9-like                                      |
| Mmu.7639.1.S1_at        | STAT1                  | STAT1                 | 2.83E-04             | 2.71   | 1.41   | 1.38   | 1.38       | signal transducer and activator of transcription 1, 91kda                         |
| MmugDNA.21377.1.S1_at   | LOC705910              | MOV10                 | 9.14E-06             | 2.71   | 1.34   | 1.19   | 1.01       | mov10, moloney leukemia virus 10, homolog (mouse)                                 |
| MmugDNA.5452.1.S1_at    | ---                    | FPR3                  | 3.53E-04             | 2.67   | 1.38   | 1.49   | 1.33       | formyl peptide receptor 3                                                         |
| MmugDNA.24297.1.S1_s_at | ---                    | SOCS1                 | 3.32E-05             | 2.66   | 1.78   | 1.17   | 1.29       | suppressor of cytokine signaling 1                                                |
| MmugDNA.22619.1.S1_x_at | LOC710928              | UNC93B1               | 2.39E-03             | 2.65   | 1.31   | 1.46   | 1.46       | unc-93 homolog b1 (C. elegans)                                                    |
| MmuSTS.1513.1.S1_at     | IFI35                  | IFI35                 | 6.37E-04             | 2.65   | 1.78   | 1.19   | 1.27       | interferon-induced protein 35                                                     |
| Mmu.12603.1.S1_at       | LOC721956              | LOC721956             | 2.88E-03             | 2.65   | 1.39   | -1.01  | 1.62       | hypothetical protein LOC721956                                                    |
| MmugDNA.22619.1.S1_at   | LOC710928              | UNC93B1               | 3.41E-03             | 2.64   | 1.33   | 1.44   | 1.43       | unc-93 homolog b1 (C. elegans)                                                    |
| MmugDNA.23681.1.S1_at   | ---                    | ---                   | 9.58E-06             | 2.64   | 1.03   | 1.24   | -1.48      | ---                                                                               |
| MmuSTS.4521.1.S1_at     | STAT2                  | STAT2                 | 1.55E-04             | 2.62   | 1.13   | 1.51   | 1.16       | signal transducer and activator of transcription 2                                |
| MmunewRS.644.1.S1_at    | ---                    | ---                   | 4.76E-03             | 2.61   | 1.33   | 1.44   | 1.09       | ---                                                                               |
| MmugDNA.8251.1.S1_at    | LOC707359              | TMEM140               | 4.47E-03             | 2.57   | 1.23   | 1.00   | 1.23       | hypothetical protein flj11000                                                     |
| MmuSTS.864.1.S1_at      | LOC710375              | LGALS8                | 9.48E-04             | 2.56   | 1.26   | 1.55   | 1.26       | lectin, galactoside-binding, soluble, 8 (galectin 8)                              |
| MmugDNA.15997.1.S1_s_at | LILRA1 // LILRAA       | LILRA1 // LILRAA      | 6.75E-04             | 2.56   | 1.27   | 1.28   | 1.14       | leukocyte immunoglobulin-like receptor, subfamily A (with TM domain), member 1 /  |
| MmugDNA.4666.1.S1_at    | TNFSF10                | TNFSF10               | 1.38E-05             | 2.55   | 1.28   | 1.06   | -1.25      | tumor necrosis factor (ligand) superfamily, member 10                             |
| MmuSTS.2164.1.S1_at     | LOC708293              | DDX10                 | 1.92E-03             | 2.55   | 5.33   | 3.74   | 1.71       | dead (asp-glu-ala-asp) box polypeptide 10                                         |
| MmuSTS.3131.1.S1_at     | LOC712754              | LOC712754             | 9.75E-05             | 2.55   | 1.15   | -1.10  | 2.18       | similar to Regulator of G-protein signaling 1 (RGS1) (Early response protein 1R2) |
| MmugDNA.30129.1.S1_at   | TNFSF10                | TNFSF10               | 3.72E-06             | 2.52   | 1.30   | 1.06   | -1.23      | tumor necrosis factor (ligand) superfamily, member 10                             |
| MmugDNA.7480.1.S1_at    | GLRX                   | GLRX                  | 7.10E-05             | 2.52   | 1.81   | 1.35   | 1.12       | glutaredoxin (thioltransferase)                                                   |
| Mmu.8122.1.A1_at        | LOC712588              | TRIM25                | 5.42E-03             | 2.51   | 1.81   | 1.18   | 1.41       | tripartite motif-containing 25                                                    |
| MmugDNA.14047.1.S1_at   | ---                    | ---                   | 1.15E-03             | 2.51   | 1.33   | 1.16   | 1.18       | ---                                                                               |
| MmugDNA.2622.1.S1_at    | LOC702384              | LOC702384             | 2.97E-07             | 2.50   | 1.14   | 1.06   | 1.20       | similar to abhydrolase domain containing 6                                        |
| MmugDNA.9176.1.S1_at    | ATP5G1                 | CNP                   | 3.17E-06             | 2.47   | 1.48   | 1.22   | 1.34       | 2',3'-cyclic nucleotide 3' phosphodiesterase                                      |
| MmugDNA.12374.1.S1_at   | LOC708936              | LOC708936             | 1.11E-05             | 2.46   | -1.08  | 1.23   | 1.02       | Similar to protein phosphatase 1, regulatory (inhibitor) subunit 2                |
| MmugDNA.10601.1.S1_at   | EHD4                   | EHD4                  | 8.89E-07             | 2.46   | 1.09   | -1.04  | 1.34       | EH-domain containing 4                                                            |
| MmugDNA.5661.1.S1_at    | LOC719402              | KIAA0082              | 6.82E-03             | 2.46   | 1.37   | 1.29   | 1.27       | kiaa0082                                                                          |
| MmugDNA.13670.1.S1_at   | DNPEP                  | DNPEP                 | 3.84E-05             | 2.45   | 1.58   | 1.32   | 1.12       | aspartyl aminopeptidase                                                           |
| MmugDNA.7797.1.S1_at    | FCN1                   | FCN1                  | 7.02E-04             | 2.44   | 2.35   | 1.57   | 1.20       | ficollin (collagen/fibrinogen domain containing) 1                                |
| MmuSTS.3554.1.S1_at     | LOC705554              | DHRS9                 | 2.65E-03             | 2.43   | 1.38   | 1.37   | -1.08      | dehydrogenase/reductase (sdr family) member 9                                     |
| MmugDNA.19523.1.S1_at   | CD184                  | CD184                 | 2.08E-05             | 2.42   | 1.53   | 1.23   | 1.20       | cd184 antigen, sialomucin                                                         |
| MmugDNA.28999.1.S1_at   | LOC718036              | KIAA1618              | 5.14E-03             | 2.42   | 1.81   | 1.45   | 1.18       | kiaa1618                                                                          |
| MmugDNA.36872.1.S1_at   | LOC694916              | LYSMD2                | 3.54E-06             | 2.41   | 1.19   | 1.14   | 1.31       | lysm, putative peptidoglycan-binding, domain containing 2                         |
| MmuSTS.4535.1.S1_at     | LOC700118              | ERAP2                 | 3.11E-07             | 2.41   | 1.47   | 1.04   | 1.03       | leukocyte-derived arginine aminopeptidase                                         |

| Affymetrix Probeset ID  | Affymetrix Gene Symbol | Corrected Gene Symbol | ANOVA (time) P-value | D10/D0 | D14/D0 | D30/D0 | CHRONIC/DO | Gene Description                                                                  |
|-------------------------|------------------------|-----------------------|----------------------|--------|--------|--------|------------|-----------------------------------------------------------------------------------|
| MmugDNA.31375.1.S1_s_at | LOC706568              | LOC706568             | 8.54E-04             | 2.40   | 1.76   | 1.12   | 1.06       | similar to caspase 1 isoform alpha precursor                                      |
| MmugDNA.6326.1.S1_s_at  | ---                    | SLFN5                 | 9.70E-05             | 2.40   | 1.78   | 1.25   | 1.08       | likely ortholog of mouse schlafen 5                                               |
| MmunewRS.902.1.S1_at    | LOC702068              | EMB                   | 5.50E-03             | 2.39   | 1.82   | 1.29   | 1.35       | ambigen homolog (mouse)                                                           |
| MmugDNA.2972.1.S1_s_at  | ---                    | SP140                 | 4.74E-05             | 2.39   | -1.08  | 1.14   | 1.25       | sp140 nuclear body protein                                                        |
| MmugDNA.22615.1.S1_s_at | ---                    | ---                   | 1.84E-04             | 2.39   | 1.01   | 1.18   | 1.19       | ---                                                                               |
| MmuSTS.4678.1.S1_s_at   | ---                    | TREX1                 | 3.70E-06             | 2.39   | 1.22   | 1.27   | 1.22       | three prime repair exonuclease 1                                                  |
| MmugDNA.19343.1.S1_s_at | HBG2                   | HBG2                  | 1.48E-03             | 2.39   | -1.40  | 0.30   | -1.08      | hemoglobin, gamma G                                                               |
| MmugDNA.2761.1.S1_s_at  | SP100                  | SP100                 | 8.00E-05             | 2.37   | 1.42   | 1.38   | 1.27       | sp100 nuclear antigen                                                             |
| MmugDNA.41220.1.S1_at   | LOC715533              | LOC715533             | 1.84E-05             | 2.37   | 1.20   | 1.01   | 1.28       | similar to poly (ADP-ribose) polymerase family, member 15                         |
| Mmu.13018.1.S1_s_at     | TRIM5                  | TRIM5                 | 2.75E-04             | 2.38   | 1.23   | 1.44   | 1.18       | tripartite motif-containing 5                                                     |
| MmugDNA.19523.1.S1_s_at | CD164                  | CD164                 | 2.75E-05             | 2.38   | 1.47   | 1.23   | 1.21       | cd164 antigen, sialomucin                                                         |
| MmugDNA.17877.1.S1_at   | ---                    | PML                   | 2.43E-06             | 2.38   | 1.03   | 1.35   | 1.12       | promyelocytic leukemia                                                            |
| MmuSTS.1659.1.S1_s_at   | LOC707072              | RPL4                  | 2.96E-04             | 2.35   | 1.80   | 1.39   | 1.40       | ribosomal protein l4                                                              |
| Mmu.11980.1.S1_s_at     | GNPAT                  | GNPAT                 | 6.37E-03             | 2.35   | 1.25   | 1.68   | 1.25       | glycerophosphate o-acyltransferase                                                |
| MmugDNA.12018.1.S1_s_at | LOC712342              | OAS3                  | 1.26E-03             | 2.35   | 1.12   | 1.31   | 1.20       | 2'-5'-oligoadenylate synthetase 3, 100kda                                         |
| MmugDNA.21968.1.S1_s_at | LOC707887              | LOC707887             | 2.55E-03             | 2.35   | 1.49   | 1.34   | 1.18       | ---                                                                               |
| MmuSTS.92.1.S1_s_at     | ---                    | ---                   | 8.90E-04             | 2.35   | 1.54   | 1.28   | 1.40       | ---                                                                               |
| MmugDNA.6224.1.S1_s_at  | LOC718484              | LOC718484             | 1.31E-06             | 2.35   | -1.02  | 1.28   | 1.12       | similar to calcium binding protein 5                                              |
| MmugDNA.39691.1.S1_s_at | TRIM38                 | TRIM38                | 7.70E-04             | 2.32   | 1.35   | 1.10   | 1.40       | tripartite motif-containing 38                                                    |
| MmugDNA.8321.1.S1_s_at  | LOC71898               | LOC71898              | 3.19E-03             | 2.32   | 1.34   | 1.15   | -1.04      | Similar to slingshot 2                                                            |
| MmugDNA.9213.1.S1_s_at  | ---                    | FLJ11286              | 1.09E-05             | 2.31   | 1.28   | 1.30   | 1.04       | hypothetical protein flj11286                                                     |
| MmugDNA.14283.1.S1_s_at | ---                    | ---                   | 1.13E-03             | 2.31   | 1.26   | 1.32   | 1.01       | ---                                                                               |
| MmuSTS.2830.1.S1_s_at   | LOC715866              | APOL3                 | 4.90E-04             | 2.30   | 1.84   | 1.16   | 1.15       | tnf-inducible protein cg12-1                                                      |
| MmugDNA.8389.1.S1_s_at  | ---                    | ---                   | 8.77E-04             | 2.30   | 1.91   | 1.51   | 1.26       | ---                                                                               |
| MmugDNA.24620.1.S1_s_at | ---                    | ---                   | 1.32E-04             | 2.30   | 1.61   | 1.41   | -1.02      | ---                                                                               |
| MmugDNA.5950.1.S1_s_at  | LOC708132              | PARP10                | 2.35E-05             | 2.29   | 1.24   | 1.30   | 1.32       | poly (adp-ribose) polymerase family, member 10                                    |
| MmuSTS.927.1.S1_s_at    | LOC693955              | LOC693955             | 1.05E-03             | 2.29   | 2.07   | 2.07   | -1.11      | similar to fem-1 homolog b                                                        |
| MmuSTS.3917.1.S1_s_at   | STAT1                  | STAT1                 | 2.80E-03             | 2.28   | 1.45   | 1.43   | 1.29       | signal transducer and activator of transcription 1, 91kda                         |
| MmugDNA.1057.1.S1_s_at  | DNAJA1                 | DNAJA1                | 8.63E-04             | 2.28   | 1.32   | 1.19   | 1.23       | DnaJ (Hsp40) homolog, subfamily A, member 1                                       |
| MmuSTS.1158.1.S1_s_at   | PHF11                  | PHF11                 | 7.41E-04             | 2.28   | 1.36   | 1.30   | 1.23       | phd finger protein 11                                                             |
| Mmu.10506.1.S1_s_at     | DNAJA1                 | DNAJA1                | 7.33E-03             | 2.28   | -1.06  | 1.53   | 1.37       | DnaJ (Hsp40) homolog, subfamily A, member 1                                       |
| MmugDNA.19435.1.S1_s_at | DNAJA1 // LOC696406    | DNAJA1 // LOC696406   | 2.66E-03             | 2.28   | -1.01  | 1.51   | 1.41       | DnaJ (Hsp40) homolog, subfamily A, member 1 // similar to DnaJ-like protein 2     |
| MmugDNA.25388.1.S1_s_at | ---                    | RIN2                  | 1.93E-03             | 2.27   | 1.24   | 1.47   | 1.27       | ras and rab interactor 2                                                          |
| MmugDNA.13798.1.S1_s_at | LOC711784              | LOC711784             | 2.48E-04             | 2.27   | 1.26   | 1.08   | 1.09       | Similar to acinotase 2, mitochondrial                                             |
| MmugDNA.34145.1.S1_s_at | LOC704928              | DYNLT1                | 4.97E-04             | 2.27   | 1.47   | 1.31   | 1.26       | dynein, light chain, ctlex-type 1                                                 |
| Mmu.12603.1.S1_s_at     | LOC721956              | LOC721956             | 1.51E-03             | 2.26   | 1.16   | 1.15   | 1.23       | hypothetical protein LOC721956                                                    |
| MmugDNA.16432.1.S1_s_at | DXH8                   | PRIC285               | 2.95E-04             | 2.25   | 1.07   | 1.31   | 1.19       | peroxisomal proliferator-activated receptor a interacting complex 285             |
| MmugDNA.2279.1.S1_s_at  | TNK2                   | TNK2                  | 4.95E-03             | 2.25   | 1.28   | 1.35   | 1.22       | tyrosine kinase, non-receptor, 2                                                  |
| MmugDNA.32890.1.S1_s_at | LOC717355              | NAPA                  | 1.65E-07             | 2.24   | 1.30   | 1.27   | 1.12       | n-ethylmaleimide-sensitive factor attachment protein, alpha                       |
| MmugDNA.37123.1.S1_s_at | ---                    | ---                   | 5.55E-05             | 2.24   | 1.06   | 1.34   | 1.19       | ---                                                                               |
| MmugDNA.23324.1.S1_s_at | LOC719898              | LOC719898             | 5.98E-05             | 2.23   | 1.18   | 1.16   | 1.12       | similar to Carcinoembryonic antigen-related cell adhesion molecule 1 precursor (  |
| MmugDNA.19992.1.S1_s_at | TRIM5                  | TRIM5                 | 4.19E-04             | 2.21   | 1.24   | 1.23   | 1.17       | tripartite motif-containing 5                                                     |
| MmugDNA.42104.1.S1_s_at | ---                    | ---                   | 4.61E-07             | 2.21   | 1.09   | 1.14   | 1.14       | ---                                                                               |
| MmugDNA.5794.1.S1_s_at  | MT2A                   | MT2A                  | 5.03E-04             | 2.21   | 1.46   | 1.31   | 1.26       | metallothionein 2a                                                                |
| MmunewRS.633.1.S1_s_at  | APOBEC3H               | APOBEC3H              | 8.58E-05             | 2.20   | 1.05   | 1.68   | 1.06       | arp10 protein                                                                     |
| MmugDNA.31960.1.S1_s_at | ---                    | XRN1                  | 3.80E-05             | 2.19   | 1.07   | 1.18   | 1.07       | 5'-3' exonuclease 1                                                               |
| MmuSTS.3184.1.S1_s_at   | LOC710061              | LOC710061             | 4.04E-04             | 2.18   | 1.42   | 1.23   | 1.05       | similar to MAP kinase interacting serine/threonine kinase 1 isoform 1             |
| MmugDNA.37307.1.S1_s_at | LOC699295              | LBA1                  | 4.44E-04             | 2.18   | 1.06   | 1.04   | 1.07       | lupus brain antigen 1                                                             |
| MmugDNA.27150.1.S1_s_at | LOC699207              | PATL1                 | 1.12E-04             | 2.18   | 1.26   | 1.21   | 1.09       | flj36874 protein                                                                  |
| MmuSTS.4171.1.S1_s_at   | MSRA                   | MSRA                  | 1.67E-03             | 2.18   | 1.52   | 1.27   | -1.00      | methionine sulfoxide reductase a                                                  |
| MmugDNA.32531.1.S1_s_at | LOC708143              | LOC708143             | 1.16E-06             | 2.17   | 1.15   | 1.18   | -1.12      | similar to protein phosphatase 1J (PP2C domain containing)                        |
| MmuSTS.4540.1.S1_s_at   | LOC694358              | LOC694358             | 5.73E-06             | 2.17   | -1.07  | -1.08  | 1.47       | similar to leucine-rich repeat kinase 1                                           |
| MmugDNA.22157.1.S1_s_at | ---                    | PCGF5                 | 9.87E-07             | 2.17   | 1.20   | 1.35   | 1.12       | polycomb group ring finger 5                                                      |
| MmugDNA.41577.1.S1_s_at | ---                    | ---                   | 8.56E-07             | 2.17   | 1.32   | 1.09   | -1.03      | ---                                                                               |
| MmugDNA.43065.1.S1_s_at | LOC714549              | LOC714549             | 4.58E-05             | 2.17   | 1.34   | 1.27   | 1.12       | similar to pregnancy-induced growth inhibitor isoform 1                           |
| MmuSTS.3274.1.S1_s_at   | LOC709733              | LOC709733             | 1.25E-04             | 2.16   | 1.44   | 1.22   | 1.23       | similar to ribosomal protein S6 kinase, 52kDa, polypeptide 1                      |
| MmuSTS.805.1.S1_s_at    | ATP5G1                 | ATP5G1                | 2.95E-07             | 2.14   | 1.00   | 1.14   | 1.24       | atp synthase, h+ transporting, mitochondrial f0 complex, subunit c1 (subunit 9)   |
| MmugDNA.19435.1.S1_s_at | LOC696406              | LOC696406             | 1.88E-03             | 2.14   | -1.10  | 1.58   | 1.23       | similar to DnaJ-like protein 2                                                    |
| MmugDNA.32966.1.S1_s_at | LOC704374              | LOC704374             | 2.54E-04             | 2.14   | 1.25   | 1.29   | 1.09       | similar to Syndecan-3 (SYND3)                                                     |
| MmugDNA.23750.1.S1_s_at | ---                    | PARP11                | 3.23E-06             | 2.13   | 1.62   | 1.17   | 1.02       | poly (adp-ribose) polymerase family, member 11                                    |
| MmugDNA.30612.1.S1_s_at | SOX30                  | SOX30                 | 2.70E-03             | 2.13   | 1.41   | 1.24   | 1.20       | SRV (sex determining region Y)-box 30                                             |
| MmugDNA.951.1.S1_s_at   | ---                    | ---                   | 9.64E-05             | 2.12   | 1.42   | 1.08   | 1.10       | ---                                                                               |
| MmugDNA.1081.1.S1_s_at  | LOC717726              | TAP1                  | 7.30E-04             | 2.11   | 1.46   | 1.08   | 1.26       | transporter 1, atp-binding cassette, sub-family b (mdr)/lap                       |
| MmugDNA.19224.1.S1_s_at | LOC710375              | LGALS8                | 1.83E-03             | 2.11   | 1.31   | 1.32   | 1.04       | lectin, galactoside-binding, soluble, 8 (galectin 8)                              |
| MmugDNA.18626.1.S1_s_at | LOC699759              | LOC699759             | 1.34E-04             | 2.11   | 1.28   | 1.10   | 1.11       | Similar to zinc finger protein 33B                                                |
| MmugDNA.41043.1.S1_s_at | ---                    | NBN                   | 1.95E-05             | 2.11   | -1.87  | 1.44   | 1.03       | nibrin                                                                            |
| MmugDNA.2776.1.S1_s_at  | SP100                  | SP100                 | 9.66E-05             | 2.11   | 1.21   | 1.40   | 1.03       | sp100 nuclear antigen                                                             |
| MmugDNA.4767.1.S1_s_at  | ---                    | LOC441108             | 5.28E-03             | 2.10   | 1.21   | 1.07   | 1.10       | hypothetical gene supported by ak128882                                           |
| MmuSTS.2164.1.S1_s_at   | LOC708293              | DDX10                 | 4.38E-04             | 2.10   | 6.45   | 2.30   | 1.73       | dead (asp-glu-ala-asp) box polypeptide 10                                         |
| MmugDNA.4964.1.S1_s_at  | LOC707625              | SPTLC2                | 1.44E-07             | 2.09   | 1.35   | 1.15   | 1.04       | serine palmitoyltransferase, long chain base subunit 2                            |
| MmugDNA.40112.1.S1_s_at | ---                    | ---                   | 1.18E-03             | 2.08   | -1.08  | 1.12   | 1.06       | ---                                                                               |
| Mmu.5363.1.S1_s_at      | LOC710966              | LOC710966             | 7.59E-04             | 2.08   | 1.27   | 1.14   | -1.08      | similar to tribbles homolog 2                                                     |
| MmugDNA.13502.1.S1_s_at | ---                    | ---                   | 4.31E-03             | 2.08   | 1.00   | 1.34   | 1.70       | ---                                                                               |
| MmugDNA.15515.1.S1_s_at | LOC698143              | LOC698143             | 8.77E-04             | 2.07   | 1.52   | 1.22   | 1.06       | Similar to 60S ribosomal protein L12                                              |
| MmugDNA.20483.1.S1_s_at | LOC703758              | LOC703758             | 6.71E-03             | 2.07   | 1.80   | 1.48   | 1.23       | similar to Protein KIAA0280                                                       |
| MmunewRS.165.1.S1_s_at  | LOC719654              | LOC719654             | 1.63E-03             | 2.07   | 1.12   | 1.09   | 1.07       | similar to sialic acid binding immunoglobulin-like lectin-like protein 1 isoform  |
| MmugDNA.14810.1.S1_s_at | LOC711784              | TRAFD1                | 1.81E-04             | 2.05   | 1.28   | 1.06   | 1.10       | traf-type zinc finger domain containing 1                                         |
| MmugDNA.31377.1.S1_s_at | LOC706568              | CASP1                 | 4.06E-03             | 2.05   | 1.49   | 1.32   | 1.18       | caspase 1, apoptosis-related cysteine peptidase (interleukin 1, beta, convertase) |
| MmuSTS.4111.1.S1_s_at   | EGF                    | EGF                   | 6.12E-04             | 2.05   | 2.15   | 1.25   | -1.06      | epidermal growth factor (beta-urogastrone)                                        |
| MmugDNA.21986.1.S1_s_at | ---                    | ---                   | 7.35E-03             | 2.05   | 1.19   | -1.07  | 1.26       | ---                                                                               |
| MmugDNA.23383.1.S1_s_at | LOC710466              | LOC710466             | 5.44E-03             | 2.05   | 1.35   | 1.25   | -1.05      | hypothetical protein LOC710466                                                    |
| MmuSTS.4836.1.S1_s_at   | LOC718197              | LOC718197             | 1.85E-05             | 2.05   | 1.41   | 1.15   | 1.10       | Similar to GPI-anchored metastasis-associated protein homolog                     |
| MmuSTS.3400.1.S1_s_at   | LOC719199              | LOC719199             | 1.09E-03             | 2.05   | 1.50   | 1.22   | 1.19       | similar to cyclin-dependent kinase inhibitor 1A                                   |
| MmugDNA.9141.1.S1_s_at  | ---                    | ---                   | 2.16E-03             | 2.05   | -1.59  | 2.26   | -1.22      | ---                                                                               |
| MmugDNA.20995.1.S1_s_at | ---                    | CCR1                  | 6.61E-03             | 2.05   | 1.49   | 1.26   | -1.09      | chemokine (c-c motif) receptor 1                                                  |
| MmugDNA.8510.1.S1_s_at  | LOC722189              | LOC722189             | 5.90E-04             | 2.05   | 1.47   | 1.15   | 1.16       | similar to Retinoic acid receptor responder protein 3 (Tazarotene-induced gene 3  |
| MmuSTS.646.1.S1_s_at    | ---                    | ---                   | 2.20E-04             | 2.05   | 1.50   | 1.48   | 1.11       | ---                                                                               |
| MmugDNA.10601.1.S1_s_at | EHD4                   | EHD4                  | 3.53E-06             | 2.04   | 1.22   | 1.03   | 1.23       | EH-domain containing 4                                                            |
| MmugDNA.40682.1.S1_s_at | ---                    | ---                   | 3.72E-05             | 2.04   | 1.04   | -1.10  | 1.12       | ---                                                                               |
| MmugDNA.599.1.S1_s_at   | LOC700921              | LOC700921             | 6.65E-03             | 2.03   | 1.40   | 1.10   | 1.19       | similar to dpy-19-like 3                                                          |
| MmugDNA.28970.1.S1_s_at | IL1RN                  | IL1RN                 | 8.62E-05             | 2.03   | -1.03  | 1.08   | -1.06      | interleukin 1 receptor antagonist                                                 |
| MmugDNA.1574.1.S1_s_at  | ---                    | ---                   | 7.36E-05             | 2.02   | 1.07   | 1.08   | 1.03       | ---                                                                               |
| MmuSTS.378.1.S1_s_at    | LOC715096              | LOC715096             | 6.42E-06             | 2.02   | 1.14   | 1.23   | 1.03       | similar to Galectin-9 (HOM-HD-21) (Ecalectin)                                     |
| MmugDNA.3087.1.S1_s_at  | ---                    | ---                   | 1.52E-04             | 2.02   | 1.27   | -1.09  | 1.15       | ---                                                                               |
| MmugDNA.6764.1.S1_s_at  | GMIP                   | GMIP                  | 2.89E-06             | 2.02   | 1.40   | 1.26   | 1.03       | GEM interacting protein                                                           |

| Affymetrix Probeset ID  | Affymetrix Gene Symbol | Corrected Gene Symbol | ANOVA (time) P-value | D10/D0 | D14/D0 | D30/D0 | CHRONIC/DO | Gene Description                                                                  |
|-------------------------|------------------------|-----------------------|----------------------|--------|--------|--------|------------|-----------------------------------------------------------------------------------|
| MmugDNA.6653.1.S1_at    | PCTAIRE2BP             | TDRD7                 | 4.33E-03             | 2.02   | 1.52   | 1.12   | 1.21       | tudor domain containing 7                                                         |
| MmugDNA.22923.1.S1_at   | ---                    | ---                   | 6.53E-05             | 2.01   | 1.32   | 1.17   | -1.05      | ---                                                                               |
| MmugDNA.228.1.S1_at     | LOC708518              | C6ORF192              | 5.23E-03             | 2.01   | 1.40   | 1.45   | 1.10       | chromosome 6 open reading frame 192                                               |
| MmugDNA.33437.1.S1_s_at | LOC713517              | ZNF313                | 3.03E-05             | 2.00   | 1.17   | 1.02   | 1.11       | zinc finger protein 313                                                           |
| MmugDNA.41579.1.S1_at   | LOC719732              | LOC719732             | 1.09E-03             | 1.97   | 2.28   | 1.23   | -1.12      | similar to triggering receptor expressed on myeloid cells-like 1                  |
| MmugDNA.9141.1.S1_x_at  | ---                    | ---                   | 2.34E-03             | 1.96   | -1.53  | 2.99   | -1.25      | ---                                                                               |
| MmugDNA.1987.1.S1_at    | SLC2A5                 | SLC2A5                | 6.61E-04             | 1.92   | 3.27   | 1.78   | 1.11       | solute carrier family 2 (facilitated glucose/fructose transporter), member 5      |
| MmugDNA.7502.1.S1_at    | LOC701123              | LOC701123             | 8.19E-05             | 1.91   | 3.58   | 1.25   | -1.26      | similar to tumor suppressor candidate 3 isoform a                                 |
| MmugDNA.2222.1.S1_s_at  | ---                    | NBN                   | 4.83E-06             | 1.89   | -2.21  | 1.35   | -1.00      | nibrin                                                                            |
| MmugDNA.7952.1.S1_at    | ---                    | ---                   | 8.95E-04             | 1.89   | 2.73   | 1.20   | -1.27      | ---                                                                               |
| MmugDNA.6277.1.S1_at    | LOC708293              | BUB1                  | 2.78E-04             | 1.89   | 5.88   | 2.47   | 1.60       | bub1 budding uninhibited by benzimidazoles 1 homolog (yeast)                      |
| MmugDNA.869.1.S1_at     | DYSF                   | DYSF                  | 5.41E-05             | 1.88   | 5.77   | 1.22   | 1.07       | dysterlin                                                                         |
| MmugDNA.500.1.S1_at     | FABP5                  | FABP5                 | 3.09E-03             | 1.86   | 2.34   | 1.72   | 1.13       | fatty acid binding protein 5 (psoriasis-associated)                               |
| MmugDNA.38900.1.S1_at   | SLC45A2                | SLC45A2               | 2.54E-03             | 1.85   | 2.02   | 1.14   | -1.20      | Membrane-associated transporter protein                                           |
| MmugDNA.21855.1.S1_s_at | ---                    | ---                   | 6.32E-04             | 1.84   | -1.52  | 2.90   | -1.09      | ---                                                                               |
| MmugDNA.25040.1.S1_at   | LOC701799              | LOC701799             | 9.85E-04             | 1.83   | 2.94   | 1.73   | 1.03       | Hypothetical protein LOC701799                                                    |
| MmugDNA.30620.1.S1_at   | ---                    | ---                   | 6.76E-04             | 1.77   | 2.25   | 1.20   | -1.40      | ---                                                                               |
| MmugDNA.18674.1.S1_at   | LOC704872              | LOC704872             | 7.70E-06             | 1.78   | 2.77   | 1.31   | -1.49      | similar to C-type lectin superfamily 4, member G                                  |
| MmugDNA.34150.1.S1_s_at | LOC701028              | LOC701028             | 3.79E-03             | 1.74   | 1.95   | 2.40   | 1.46       | hypothetical protein LOC701028                                                    |
| MmugDNA.32941.1.S1_at   | LOC711569              | C16ORF75              | 1.82E-07             | 1.73   | 3.68   | 2.11   | 1.27       | hypothetical protein mgc24665                                                     |
| MmugDNA.3508.1.S1_at    | LOC700467              | LOC700467             | 2.69E-03             | 1.73   | -2.67  | 1.55   | -1.00      | similar to complement component 5                                                 |
| MmugDNA.4208.1.S1_at    | LOC702754              | LOC702754             | 4.32E-03             | 1.73   | 2.31   | 1.32   | -1.33      | similar to glucosaminyl (N-acetyl) transferase 3, mucin type                      |
| MmugDNA.28421.1.S1_at   | ---                    | ---                   | 4.59E-03             | 1.73   | -2.46  | 1.72   | -1.15      | ---                                                                               |
| MmugDNA.36470.1.S1_at   | LOC709220              | LOC709220             | 1.28E-03             | 1.69   | 3.35   | 1.90   | 1.56       | Similar to zinc finger protein 587                                                |
| MmugDNA.29385.1.S1_at   | MIRN21                 | MIRN21                | 6.97E-03             | 1.66   | 2.15   | 1.34   | 1.06       | microRNA 21                                                                       |
| MmugDNA.8645.1.S1_at    | ---                    | ---                   | 8.15E-05             | 1.65   | -6.23  | 1.09   | -1.48      | ---                                                                               |
| MmugDNA.33886.1.S1_at   | LOC722264              | LOC722264             | 2.02E-03             | 1.64   | -2.07  | 1.64   | 1.02       | conserved gene telomeric to alpha globin cluster                                  |
| MmugDNA.483.1.S1_at     | LOC719807              | LOC719807             | 9.84E-04             | 1.64   | -3.56  | 1.75   | -1.49      | similar to intelectin                                                             |
| MmugDNA.8645.1.S1_x_at  | ---                    | ---                   | 1.45E-04             | 1.63   | -5.52  | 1.15   | -1.52      | ---                                                                               |
| MmugDNA.43348.1.S1_at   | ---                    | ---                   | 4.55E-05             | 1.60   | 3.01   | 2.80   | 1.40       | ---                                                                               |
| MmugDNA.19842.1.S1_at   | CA13                   | CA13                  | 5.68E-04             | 1.60   | 2.85   | 1.05   | -1.45      | carbonic anhydrase XIII                                                           |
| MmugDNA.14465.1.S1_at   | ---                    | ---                   | 4.17E-03             | 1.59   | 2.06   | 1.27   | -1.47      | ---                                                                               |
| MmugDNA.2361.1.S1_at    | LOC715264              | LOC715264             | 2.26E-03             | 1.59   | 2.25   | 1.41   | 1.14       | similar to Protein S100-A2 (S100 calcium-binding protein A2) (Protein S-100L) (C) |
| MmugDNA.41044.1.S1_at   | ---                    | NBN                   | 1.89E-05             | 1.58   | -3.11  | 1.10   | 1.01       | nibrin                                                                            |
| MmugDNA.4045.1.S1_at    | LOC710925              | LOC710925             | 2.60E-03             | 1.58   | -1.15  | 1.30   | 2.48       | similar to SP140 nuclear body protein isoform 1                                   |
| MmugDNA.598.1.S1_at     | HP                     | HP                    | 4.27E-04             | 1.56   | 8.67   | 2.41   | -1.92      | haptoglobin                                                                       |
| MmugDNA.2222.1.S1_at    | ---                    | NBN                   | 3.51E-05             | 1.56   | -3.92  | 1.18   | 1.03       | nibrin                                                                            |
| MmugDNA.9253.1.S1_at    | LOC706102              | LOC706102             | 3.38E-05             | 1.54   | -3.43  | 1.19   | -1.30      | similar to muscleblind-like 3 isoform G                                           |
| MmugDNA.4685.1.S1_at    | TYMS                   | TYMS                  | 4.13E-05             | 1.53   | 7.65   | 3.25   | 1.90       | thymidylate synthetase                                                            |
| AFFX-Mmu-gapdh-M_s_at   | GAPDH                  | GAPDH                 | 1.26E-03             | 1.53   | 2.32   | 1.29   | 1.02       | Glyceraldehyde-3-phosphate dehydrogenase                                          |
| AFFX-Mmu-gapdh-5_at     | GAPDH                  | GAPDH                 | 2.66E-03             | 1.53   | 3.30   | 1.12   | 1.05       | Glyceraldehyde-3-phosphate dehydrogenase                                          |
| Mmu.11151.1.S1_at       | LTB4DH // LTB4DH       | LTB4DH // LTB4DH      | 3.93E-04             | 1.51   | -2.37  | 1.25   | -1.05      | NADP-dependent leukotriene B4 12-hydroxydehydrogenase // similar to NADP-depend   |
| MmugDNA.36695.1.S1_at   | LOC715070              | LOC715070             | 6.70E-04             | 1.51   | -2.04  | 1.91   | 1.05       | similar to UBX domain containing 1                                                |
| MmugDNA.26846.1.S1_at   | ---                    | ---                   | 4.08E-03             | 1.50   | 2.20   | 1.18   | -1.25      | ---                                                                               |
| MmugDNA.4311.1.S1_x_at  | LOC897235              | LOC897235             | 1.16E-04             | 1.49   | 7.58   | 1.93   | 1.16       | similar to Histone H2A type 1-D (H2A.3)                                           |
| MmugDNA.2191.1.S1_at    | LOC715562              | LOC715562             | 1.04E-03             | 1.49   | -3.39  | 1.19   | -1.38      | similar to hemogen                                                                |
| MmugDNA.24936.1.S1_at   | LTB4DH                 | LTB4DH                | 4.42E-04             | 1.49   | -2.27  | 1.27   | -1.03      | NADP-dependent leukotriene B4 12-hydroxydehydrogenase                             |
| MmugDNA.42241.1.S1_at   | LOC719669              | LOC719669             | 6.84E-03             | 1.49   | -2.25  | 1.60   | -1.17      | similar to benzodiazepine receptor (peripheral)-like 1                            |
| MmugDNA.38010.1.S1_at   | ---                    | ---                   | 1.06E-04             | 1.48   | 3.20   | 1.15   | -1.57      | ---                                                                               |
| MmugDNA.4311.1.S1_at    | LOC897235              | LOC897235             | 9.83E-06             | 1.48   | 8.43   | 1.95   | 1.16       | similar to Histone H2A type 1-D (H2A.3)                                           |
| MmugDNA.25123.1.S1_s_at | RNASE2                 | RNASE2                | 7.72E-04             | 1.47   | 3.53   | 1.41   | -1.04      | ribonuclease, RNase A family, 2 (liver, eosinophil-derived neurotoxin)            |
| MmugDNA.9683.1.S1_at    | DNAI2                  | DNAI2                 | 1.01E-04             | 1.47   | -3.34  | 1.49   | -1.07      | dynein, axonemal, intermediate chain 2                                            |
| MmugDNA.42981.1.S1_at   | ---                    | ---                   | 2.49E-03             | 1.46   | 2.11   | 1.12   | -1.09      | ---                                                                               |
| MmugDNA.2616.1.S1_at    | ERAF                   | ERAF                  | 1.50E-03             | 1.45   | -2.85  | 1.52   | -1.20      | arthroid associated factor                                                        |
| AFFX-Mmu-gapdh-M_x_at   | GAPDH                  | GAPDH                 | 2.08E-03             | 1.45   | 3.04   | 1.11   | 1.04       | Glyceraldehyde-3-phosphate dehydrogenase                                          |
| MmugDNA.4200.1.S1_x_at  | LOC711691              | LOC711691             | 1.35E-03             | 1.45   | 4.23   | 1.63   | 1.32       | Similar to pre-B-cell leukemia transcription factor 3                             |
| MmugDNA.4740.1.S1_at    | F13A1                  | F13A1                 | 8.79E-04             | 1.45   | 2.58   | 1.30   | -1.04      | coagulation factor XIII, AT polypeptide                                           |
| Mmu.11151.1.S1_s_at     | LTB4DH                 | LTB4DH                | 6.09E-04             | 1.45   | -2.22  | 1.21   | -1.04      | NADP-dependent leukotriene B4 12-hydroxydehydrogenase                             |
| MmugDNA.37366.1.S1_at   | LOC696622              | LOC696622             | 2.77E-04             | 1.44   | -5.71  | 1.05   | -1.22      | similar to SA hypertension-associated homolog isoform 1                           |
| MmugDNA.1343.1.S1_at    | TFDP1                  | TFDP1                 | 1.20E-03             | 1.44   | 3.81   | 1.67   | 1.25       | Similar to Transcription factor Dp-1 (E2F dimerization partner 1) (DRTF1-polypep  |
| MmugDNA.13271.1.S1_at   | ---                    | ---                   | 2.55E-03             | 1.41   | -2.25  | 1.92   | -1.30      | ---                                                                               |
| MmugDNA.30227.1.S1_at   | LOC705063              | LOC705063             | 1.25E-04             | 1.41   | -6.07  | 1.21   | 1.11       | similar to nitric oxide synthase trafficking isoform 1                            |
| MmugDNA.1209.1.S1_at    | TMOD1                  | TMOD1                 | 1.19E-03             | 1.39   | -3.77  | 1.42   | -1.11      | tropomodulin 1                                                                    |
| MmugDNA.21439.1.S1_at   | LOC701889              | LOC701889             | 1.44E-03             | 1.39   | 4.17   | 2.05   | -1.18      | Similar to 60S ribosomal protein L7a                                              |
| MmugDNA.11078.1.S1_at   | ---                    | ---                   | 5.16E-04             | 1.38   | -2.32  | 1.80   | -1.00      | ---                                                                               |
| MmugDNA.38008.1.S1_at   | LOC718871              | LOC718871             | 3.09E-03             | 1.38   | -1.12  | 1.07   | 2.28       | similar to asparaginase-like 1 protein                                            |
| MmugDNA.4200.1.S1_at    | LOC711691              | LOC711691             | 1.85E-03             | 1.38   | -4.73  | 1.74   | 1.35       | Similar to pre-B-cell leukemia transcription factor 3                             |
| MmugDNA.11842.1.S1_at   | ---                    | ---                   | 2.50E-03             | 1.37   | -2.15  | 1.77   | -1.07      | ---                                                                               |
| MmugDNA.3866.1.S1_s_at  | LOC714071              | LOC714071             | 5.94E-05             | 1.37   | -2.16  | 1.06   | -1.29      | hypothetical protein LOC714071                                                    |
| MmugDNA.5830.1.S1_at    | TMOD1                  | TMOD1                 | 7.41E-04             | 1.37   | -4.28  | 1.44   | -1.17      | tropomodulin 1                                                                    |
| MmugDNA.6851.1.S1_at    | LOC695554              | LOC695554             | 5.57E-03             | 1.37   | -2.11  | 1.34   | -1.06      | hypothetical protein LOC695554                                                    |
| MmugDNA.8597.1.S1_at    | ---                    | ---                   | 2.06E-03             | 1.37   | -3.35  | 1.84   | -1.03      | ---                                                                               |
| MmugDNA.39221.1.S1_at   | ---                    | ---                   | 2.34E-06             | 1.36   | 3.32   | 1.34   | 1.22       | ---                                                                               |
| MmugDNA.34587.1.S1_s_at | GAPDH                  | GAPDH                 | 7.17E-04             | 1.36   | 2.25   | 1.15   | 1.02       | glyceraldehyde-3-phosphate dehydrogenase                                          |
| MmugDNA.6249.1.S1_at    | NFIX                   | NFIX                  | 1.05E-03             | 1.36   | -2.84  | 1.39   | -1.21      | nuclear factor IX (CCAAT-binding transcription factor)                            |
| MmugDNA.3368.1.S1_at    | LOC722330              | LOC722330             | 9.55E-04             | 1.36   | 2.11   | -1.02  | 1.06       | similar to phosphofructokinase, platelet                                          |
| MmugDNA.2452.1.S1_at    | LOC696407              | LOC696407             | 2.01E-03             | 1.36   | -3.06  | 1.72   | -1.32      | similar to McLeod syndrome-associated, Kell blood group protein                   |
| MmugDNA.35516.1.S1_at   | CTSD                   | CTSD                  | 1.55E-04             | 1.35   | 2.35   | 1.10   | -1.00      | cathepsin D                                                                       |
| MmugDNA.2026.1.S1_at    | LOC712474              | LOC712474             | 6.19E-04             | 1.35   | -2.14  | 1.30   | 1.38       | similar to cAMP-dependent protein kinase inhibitor gamma                          |
| MmugDNA.4002.1.S1_at    | THBD                   | THBD                  | 1.05E-03             | 1.35   | 2.21   | 1.23   | -1.05      | thrombospondin                                                                    |
| MmugDNA.20179.1.S1_at   | LOC714802              | LOC714802             | 4.07E-04             | 1.35   | -2.73  | 1.40   | 1.01       | similar to C16C10.1                                                               |
| MmugDNA.8879.1.S1_at    | SESN3                  | SESN3                 | 5.08E-04             | 1.35   | -4.52  | 1.66   | -1.03      | sestrin 3                                                                         |
| MmugDNA.4725.1.S1_at    | LOC705323              | LOC705323             | 4.50E-03             | 1.34   | 1.29   | 2.38   | -1.34      | Similar to vacuolar protein sorting 13A isoform A                                 |
| MmugDNA.17219.1.S1_at   | LOC703889              | LOC703889             | 1.13E-09             | 1.34   | 3.97   | 1.76   | 1.11       | similar to histone 1, H2ai (predicted)                                            |
| MmugDNA.23.14.S1_at     | ---                    | ---                   | 8.18E-04             | 1.33   | -2.04  | 1.42   | -1.09      | ---                                                                               |
| MmugDNA.144.1.S1_at     | LOC710888              | LOC710888             | 3.17E-04             | 1.33   | 2.28   | 1.85   | 1.33       | similar to minichromosome maintenance protein 2                                   |
| MmugDNA.35069.1.S1_at   | RAB6B                  | RAB6B                 | 3.12E-03             | 1.33   | 2.27   | 1.12   | -1.16      | RAB6B, member RAS oncogene family                                                 |
| MmugDNA.2757.1.S1_at    | LOC702959              | LOC702959             | 9.24E-04             | 1.32   | -2.18  | 1.45   | -1.25      | similar to interferon-related developmental regulator 2                           |
| MmugDNA.30056.1.S1_at   | TYMS                   | TYMS                  | 1.29E-05             | 1.32   | 4.35   | 2.31   | 1.51       | thymidylate synthetase                                                            |
| MmugDNA.4597.1.S1_at    | LOC703271              | LOC703271             | 8.60E-04             | 1.32   | -2.88  | 1.53   | -1.14      | similar to hyaluronoglucosaminidase 3                                             |
| MmugDNA.30746.1.S1_at   | LOC713737              | LOC713737             | 2.68E-04             | 1.32   | -3.07  | 1.69   | 1.31       | similar to lymphocyte-activation protein 3 precursor                              |
| MmugDNA.23156.1.S1_s_at | LOC701134              | LOC701134             | 1.76E-03             | 1.31   | -3.76  | 1.23   | -1.25      | Similar to faciogenital dysplasia protein                                         |
| MmugDNA.37873.1.S1_at   | PCDH11                 | PCDH11                | 2.64E-04             | 1.30   | 2.09   | 1.13   | -1.18      | Protocadherin alpha 11                                                            |
| MmugDNA.23761.1.S1_at   | LOC708579              | LOC708579             | 6.13E-06             | 1.30   | 4.71   | 2.80   | 1.48       | similar to RAD51 homolog protein isoform 1                                        |
| MmugDNA.29213.1.S1_at   | LOC897235              | LOC897235             | 5.75E-05             | 1.29   | 6.22   | 1.75   | 1.17       | similar to Histone H2A type 1-D (H2A.3)                                           |

| Affymetrix Probeset ID  | Affymetrix Gene Symbol | Corrected Gene Symbol | ANOVA (time) P-value | D10/D0 | D14/D0 | D30/D0 | CHRONIC/D0 | Gene Description                                                                   |
|-------------------------|------------------------|-----------------------|----------------------|--------|--------|--------|------------|------------------------------------------------------------------------------------|
| MmugDNA_39823.1.S1_s_at | ---                    | KIAA0101              | 3.83E-05             | 1.29   | 6.44   | 3.69   | 2.13       | kiaa0101                                                                           |
| MmugDNA_28101.1.S1_s_at | ST3GAL5                | ST3GAL5               | 1.12E-03             | 1.29   | 1.20   | 1.15   | 2.21       | ST3 beta-galactoside alpha-2,3-sialyltransferase 5                                 |
| MmugDNA_3046.1.S1_s_at  | CLIC1                  | CLIC1                 | 4.02E-03             | 1.29   | 2.23   | 1.15   | 1.18       | chloride intracellular channel 1                                                   |
| MmugDNA_22473.1.S1_s_at | ---                    | ---                   | 2.61E-03             | 1.29   | 2.08   | -1.01  | 1.01       | ---                                                                                |
| Mmu.5875.1.S1_s_at      | GYPB                   | GYPB                  | 4.78E-04             | 1.28   | -7.26  | -1.06  | -1.33      | glycophorin A                                                                      |
| Mmu.14041.1.S1_s_at     | USP15                  | USP15                 | 4.57E-03             | 1.28   | -2.04  | 1.13   | 1.23       | ubiquitin specific peptidase 15                                                    |
| MmugDNA_43560.1.S1_s_at | LOC693642              | LOC693642             | 1.88E-05             | 1.28   | 2.15   | 1.30   | -1.18      | similar to RNA binding motif protein 9 isoform 1                                   |
| MmugDNA_7137.1.S1_s_at  | LOC696622              | LOC696622             | 3.20E-03             | 1.27   | -3.37  | 1.12   | -1.21      | similar to SA hypertension-associated homolog isoform 1                            |
| MmugDNA_2512.1.S1_s_at  | LOC695836              | LOC695836             | 4.66E-04             | 1.27   | 2.01   | 1.52   | 1.26       | hypothetical protein LOC695836                                                     |
| MmugDNA_31369.1.S1_s_at | ---                    | RRM2                  | 2.58E-04             | 1.27   | 8.14   | 3.57   | 2.21       | ribonucleotide reductase m2 polypeptide                                            |
| MmugDNA_40252.1.S1_s_at | LOC717262              | LOC717262             | 3.46E-03             | 1.27   | -1.70  | 2.15   | 1.00       | similar to zyg-11 homolog B (C. elegans)-like                                      |
| MmugDNA_39863.1.S1_s_at | ---                    | C18ORF24              | 2.74E-03             | 1.27   | 3.73   | 2.48   | 1.76       | chromosome 18 open reading frame 24                                                |
| MmugDNA_37537.1.S1_s_at | LOC704626              | LOC704626             | 3.97E-04             | 1.27   | -2.55  | 1.40   | -1.02      | similar to adiponectin receptor 1                                                  |
| MmuSTS_3275.1.S1_s_at   | LOC700582              | RRM2                  | 7.87E-04             | 1.26   | 6.11   | 2.81   | 1.89       | ribonucleotide reductase m2 polypeptide                                            |
| MmuSTS_616.1.S1_s_at    | LOC712354              | LOC712354             | 1.79E-03             | 1.26   | -2.20  | 1.42   | -1.15      | similar to Intercellular adhesion molecule 4 precursor (ICAM-4) (Landsteiner-Wie   |
| MmugDNA_4124.1.S1_s_at  | LOC721995              | CDC45                 | 1.32E-05             | 1.25   | 3.74   | 2.22   | 1.45       | cell division cycle associated 5                                                   |
| MmugDNA_20685.1.S1_s_at | LOC715117              | LOC715117             | 1.30E-03             | 1.24   | -2.14  | 1.53   | -1.05      | similar to activating signal coregulator 1 complex subunit 2                       |
| MmugDNA_20333.1.S1_s_at | IL12RB2                | IL12RB2               | 1.80E-03             | 1.23   | 2.04   | 1.11   | 1.22       | interleukin 12 receptor, beta 2                                                    |
| Mmu.6559.1.S1_s_at      | LOC701387              | LOC701387             | 8.24E-04             | 1.22   | 3.45   | 1.46   | 1.09       | similar to Adipophilin (Adipose differentiation-related protein) (ADRP)            |
| MmugDNA_16154.1.S1_s_at | LOC711305              | LOC711305             | 6.19E-05             | 1.22   | 2.05   | 1.44   | 1.13       | similar to Methionine-R-sulfoxide reductase B2                                     |
| MmugDNA_8160.1.S1_s_at  | UQCRC1                 | UQCRC1                | 7.32E-04             | 1.21   | 2.26   | 1.16   | -1.06      | ubiquinol-cytochrome c reductase core protein 1                                    |
| MmuSTS_1558.1.S1_s_at   | MELK                   | MELK                  | 2.59E-05             | 1.21   | 5.76   | 2.49   | 1.85       | maternal embryonic leucine zipper kinase                                           |
| MmugDNA_38920.1.S1_s_at | LOC713371              | LOC713371             | 1.71E-04             | 1.20   | -4.42  | 1.14   | -1.04      | similar to amyotrophic lateral sclerosis 2 (juvenile) chromosome region, candida   |
| MmugDNA_42453.1.S1_s_at | LOC695372              | LOC695372             | 2.15E-03             | 1.20   | 2.22   | 1.20   | 1.03       | hypothetical protein LOC695372                                                     |
| MmugDNA_20581.1.S1_s_at | ---                    | ---                   | 5.04E-03             | 1.20   | -2.55  | 1.53   | -1.34      | ---                                                                                |
| MmugDNA_3956.1.S1_s_at  | LOC715562              | LOC715562             | 5.87E-04             | 1.20   | 6.18   | 1.10   | -1.43      | similar to hemogen                                                                 |
| MmuSTS_3327.1.S1_s_at   | OIP5                   | OIP5                  | 3.85E-04             | 1.20   | 3.70   | 2.25   | 1.53       | opa interacting protein 5                                                          |
| MmugDNA_24523.1.S1_s_at | LOC711581              | LOC711581             | 3.43E-04             | 1.20   | 2.62   | 1.61   | 1.37       | similar to cell division cycle associated 2                                        |
| MmugDNA_9770.1.S1_s_at  | LOC714207              | LOC714207             | 9.44E-05             | 1.19   | 3.43   | 2.00   | 1.38       | similar to G-2 and S-phase expressed 1                                             |
| MmugDNA_9497.1.S1_s_at  | KIFC1                  | KIFC1                 | 3.01E-06             | 1.19   | 2.72   | 1.65   | 1.32       | kinesin family member C1                                                           |
| MmugDNA_25384.1.S1_s_at | UBE2C                  | UBE2C                 | 4.85E-06             | 1.19   | 4.65   | 2.85   | 1.46       | ubiquitin-conjugating enzyme e2c                                                   |
| MmuSTS_4420.1.S1_s_at   | TPX2                   | TPX2                  | 1.15E-04             | 1.18   | 2.13   | 1.61   | 1.29       | TPX2, microtubule-associated, homolog (Xenopus laevis)                             |
| MmugDNA_18716.1.S1_s_at | TFDP2                  | TFDP2                 | 1.89E-04             | 1.18   | 6.18   | 1.11   | 1.06       | transcription factor Dp-2 (E2F dimerization partner 2)                             |
| MmuSTS_1276.1.S1_s_at   | ---                    | ---                   | 1.96E-03             | 1.18   | -3.14  | 1.06   | -1.60      | ---                                                                                |
| MmugDNA_8585.1.S1_s_at  | ---                    | ---                   | 1.18E-03             | 1.18   | 2.40   | 1.23   | -1.13      | ---                                                                                |
| MmugDNA_29514.1.S1_s_at | ---                    | ---                   | 4.72E-04             | 1.18   | 2.05   | 1.20   | -1.06      | ---                                                                                |
| MmugDNA_21462.1.S1_s_at | KIF4A                  | KIF4A                 | 3.67E-05             | 1.18   | 2.41   | 1.46   | 1.13       | kinesin family member 4                                                            |
| MmugDNA_8836.1.S1_s_at  | LOC695568              | LOC695568             | 2.38E-04             | 1.18   | 4.24   | 2.35   | 1.57       | similar to minichromosome maintenance protein 10 isoform 2                         |
| MmugDNA_37946.1.S1_s_at | ABCC13                 | ABCC13                | 3.48E-03             | 1.18   | -2.25  | 1.14   | -1.11      | ATP-binding cassette transporter 13                                                |
| MmugDNA_27310.1.S1_s_at | LOC717131              | LOC717131             | 1.06E-03             | 1.18   | -2.07  | 1.10   | -1.15      | hypothetical protein LOC717131                                                     |
| MmugDNA_6936.1.S1_s_at  | SOXB6                  | SOXB6                 | 2.64E-03             | 1.18   | -3.72  | 1.28   | -1.37      | SRY (sex determining region Y)-box 6                                               |
| MmugDNA_3867.1.S1_s_at  | LOC714071              | LOC714071             | 4.43E-03             | 1.18   | -2.03  | 1.13   | -1.28      | hypothetical protein LOC714071                                                     |
| MmugDNA_4085.1.S1_s_at  | LOC700589              | CCNE1                 | 4.89E-04             | 1.18   | 2.04   | 1.95   | 1.48       | cyclin e1                                                                          |
| MmugDNA_20407.1.S1_s_at | ---                    | ---                   | 1.13E-03             | 1.18   | 2.94   | 1.41   | -1.12      | ---                                                                                |
| MmuSTS_3165.1.S1_s_at   | ---                    | ---                   | 2.86E-04             | 1.17   | -4.06  | 1.41   | -1.05      | ---                                                                                |
| MmuSTS_2138.1.S1_s_at   | B4GALT4                | B4GALT4               | 3.56E-03             | 1.17   | 3.10   | -1.00  | 1.14       | UDP-Gal-betaGlcNAc beta 1,4-galactosyltransferase, polypeptide 4                   |
| MmuNewRS_494.1.S1_s_at  | ---                    | ---                   | 5.50E-03             | 1.17   | -2.03  | 1.26   | 1.00       | ---                                                                                |
| MmugDNA_2768.1.S1_s_at  | LOC693637              | LOC693637             | 7.28E-05             | 1.17   | 3.25   | 1.51   | 1.36       | similar to cell division cycle associated 1                                        |
| MmugDNA_30331.1.S1_s_at | LOC697733              | LOC697733             | 1.61E-03             | 1.17   | 2.12   | 1.26   | -1.31      | similar to multiple C2-domains with two transmembrane regions 1 isoform S          |
| MmugDNA_10778.1.S1_s_at | LOC694877              | CDKN3                 | 1.96E-05             | 1.17   | 4.34   | 2.34   | 1.59       | cyclin-dependent kinase inhibitor 3 (cdk2-associated dual specificity phosphatase) |
| MmugDNA_28002.1.S1_s_at | LOC709195              | LOC709195             | 2.66E-05             | 1.17   | 4.53   | 2.22   | 1.50       | hypothetical protein LOC709195                                                     |
| Mmu.2556.1.S1_s_at      | TFDP2                  | TFDP2                 | 1.61E-04             | 1.17   | -3.84  | 1.10   | 1.07       | transcription factor Dp-2 (E2F dimerization partner 2)                             |
| MmugDNA_15549.1.S1_s_at | LOC718841              | LOC718841             | 1.02E-03             | 1.16   | -2.62  | 1.19   | -1.19      | Similar to Fc receptor-like 1                                                      |
| MmugDNA_20669.1.S1_s_at | LOC701182              | LOC701182             | 8.15E-05             | 1.16   | 2.81   | 1.24   | 1.17       | hypothetical protein LOC701182                                                     |
| MmugDNA_40091.1.S1_s_at | TFDP2                  | TFDP2                 | 3.23E-04             | 1.16   | -4.41  | 1.25   | -1.11      | transcription factor Dp-2 (E2F dimerization partner 2)                             |
| MmugDNA_8456.1.S1_s_at  | KDEL3                  | KDEL3                 | 3.15E-04             | 1.16   | 2.38   | 1.49   | 1.18       | KDEL (Lys-Asp-Glu-Leu) endoplasmic reticulum protein retention receptor 3          |
| Mmu.1387.1.S1_s_at      | ---                    | ---                   | 2.74E-04             | 1.16   | -2.15  | 1.66   | -1.29      | ---                                                                                |
| MmugDNA_41887.1.S1_s_at | MYBL2                  | MYBL2                 | 3.00E-03             | 1.16   | 3.33   | 1.63   | 1.25       | v-myb myeloblastosis viral oncogene homolog (avian)-like 2                         |
| MmugDNA_27464.1.S1_s_at | LOC709427              | LOC709427             | 2.58E-03             | 1.15   | -4.96  | 1.61   | -1.08      | similar to erythrocyte membrane protein band 4.2                                   |
| MmuSTS_1534.1.S1_s_at   | ---                    | ---                   | 3.25E-05             | 1.15   | 2.11   | 1.64   | 1.18       | ---                                                                                |
| MmugDNA_7301.1.S1_s_at  | LOC703530              | LOC703530             | 2.59E-03             | 1.14   | -2.14  | 1.42   | -1.04      | similar to speedy homolog 1 isoform 2                                              |
| MmugDNA_450.1.S1_s_at   | LOC708158              | LOC708158             | 3.62E-03             | 1.14   | -2.85  | 1.08   | -1.48      | similar to hypoxia-inducible factor prolyl 4-hydroxylase isoform A                 |
| MmugDNA_2559.1.S1_s_at  | LOC706506              | LOC706506             | 1.85E-03             | 1.14   | -4.52  | 1.11   | -1.24      | similar to leucine rich repeat containing 35                                       |
| MmugDNA_43396.1.S1_s_at | LOC713911              | LOC713911             | 3.10E-05             | 1.14   | 2.88   | 1.16   | 1.06       | similar to mammary tumor virus receptor 2 isoform-like                             |
| MmugDNA_38940.1.S1_s_at | LOC714763              | LOC714763             | 3.45E-04             | 1.14   | -3.53  | 1.01   | -1.25      | similar to CG1998-PA                                                               |
| MmugDNA_11364.1.S1_s_at | LOC709805              | LOC709805             | 2.73E-04             | 1.14   | 2.87   | 2.01   | 1.44       | similar to forkhead box M1 isoform 3                                               |
| MmugDNA_33387.1.S1_s_at | HIP2                   | HIP2                  | 1.37E-03             | 1.14   | 2.41   | 1.72   | 1.29       | Huntingtin interacting protein 2                                                   |
| MmugDNA_15754.1.S1_s_at | LOC713358              | LOC713358             | 7.27E-05             | 1.13   | 3.51   | 1.76   | 1.25       | similar to CHK1 checkpoint homolog                                                 |
| MmugDNA_7866.1.S1_s_at  | LOC711530              | LOC711530             | 1.46E-03             | 1.13   | 2.23   | 1.45   | 1.24       | similar to DNA replication factor                                                  |
| MmuSTS_2066.1.S1_s_at   | GINS2                  | GINS2                 | 1.56E-04             | 1.13   | 2.74   | 1.76   | 1.30       | GINS complex subunit 2 (Psf2 homolog)                                              |
| MmugDNA_22810.1.S1_s_at | LOC716842              | LOC716842             | 2.16E-03             | 1.13   | -6.25  | 1.40   | 1.04       | similar to Kruppel-like factor 1 (erythroid)                                       |
| MmugDNA_35559.1.S1_s_at | LOC698238              | LOC698238             | 1.83E-05             | 1.13   | 3.91   | 2.32   | 1.33       | similar to Histone H1.2 (H1d)                                                      |
| MmuSTS_3544.1.S1_s_at   | LOC694416              | LOC694416             | 1.82E-03             | 1.13   | -2.96  | 1.38   | -1.12      | similar to Pre-B-cell leukemia transcription factor 1 (Homeobox protein PBX1)      |
| MmugDNA_3701.1.S1_s_at  | NR4A2                  | NR4A2                 | 1.50E-04             | 1.13   | 1.13   | -1.31  | 3.01       | nuclear receptor subfamily 4, group A, member 2                                    |
| MmugDNA_26033.1.S1_s_at | LOC713624              | CENPN                 | 1.71E-04             | 1.13   | 2.56   | 1.70   | 1.28       | chromosome 16 open reading frame 60                                                |
| MmuSTS_636.1.S1_s_at    | LOC699182              | LOC699182             | 2.10E-03             | 1.12   | -3.76  | 1.37   | -1.06      | similar to tripartite motif-containing 58                                          |
| MmugDNA_29488.1.S1_s_at | HIPK1                  | HIPK1                 | 1.00E-03             | 1.12   | -3.57  | 1.33   | -1.23      | homeodomain interacting protein kinase 1                                           |
| MmuSTS_1736.1.S1_s_at   | ---                    | ---                   | 8.09E-05             | 1.12   | 3.49   | 1.80   | -1.27      | ---                                                                                |
| MmuSTS_673.1.S1_s_at    | LOC721861              | LOC721861             | 5.97E-06             | 1.12   | 3.75   | 1.94   | 1.40       | similar to chromatin assembly factor 1, subunit A (p150)                           |
| MmugDNA_13724.1.S1_s_at | ---                    | ---                   | 8.17E-04             | 1.12   | -3.32  | 1.22   | -1.07      | ---                                                                                |
| MmugDNA_2976.1.S1_s_at  | LOC718180              | LOC718180             | 5.62E-07             | 1.12   | 2.18   | 1.48   | 1.10       | hypothetical protein LOC718180                                                     |
| MmugDNA_30971.1.S1_s_at | ---                    | ---                   | 4.28E-04             | 1.12   | 2.14   | 1.33   | -1.12      | ---                                                                                |
| MmugDNA_30164.1.S1_s_at | LOC710328              | LOC710328             | 4.29E-04             | 1.12   | 3.71   | 1.48   | 1.31       | similar to timeless-interacting protein                                            |
| MmugDNA_36182.1.S1_s_at | ---                    | ---                   | 6.42E-03             | 1.12   | -3.43  | 1.24   | -1.56      | ---                                                                                |
| MmugDNA_24379.1.S1_s_at | TFPI                   | TFPI                  | 4.01E-03             | 1.12   | 2.10   | 1.11   | -1.03      | tissue factor pathway inhibitor                                                    |
| MmugDNA_22775.1.S1_s_at | DIAPH3                 | DIAPH3                | 2.66E-04             | 1.11   | 2.70   | 1.83   | 1.27       | diaphanous homolog 3                                                               |
| MmugDNA_7726.1.S1_s_at  | LOC704669              | LOC704669             | 2.50E-04             | 1.11   | -2.73  | 1.07   | -1.03      | similar to sorting nexin associated golgi protein 1                                |
| MmugDNA_3020.1.S1_s_at  | LOC710680              | LOC710680             | 3.55E-04             | 1.11   | 2.12   | 1.45   | 1.31       | similar to Zwilch                                                                  |
| MmugDNA_8986.1.S1_s_at  | ---                    | ---                   | 8.62E-04             | 1.11   | -2.01  | 1.06   | -1.07      | ---                                                                                |
| MmugDNA_5873.1.S1_s_at  | ---                    | CEP55                 | 2.63E-05             | 1.11   | 5.24   | 2.57   | 1.81       | centrosomal protein 55kDa                                                          |
| MmuSTS_1535.1.S1_s_at   | KIF2C                  | KIF2C                 | 3.61E-08             | 1.10   | 4.05   | 2.18   | 1.45       | kinesin family member 2C                                                           |
| MmugDNA_14990.1.S1_s_at | ---                    | ---                   | 5.17E-04             | 1.10   | -1.08  | -1.08  | 2.98       | ---                                                                                |
| MmugDNA_29315.1.S1_s_at | LOC701888              | DEPDC1                | 4.97E-05             | 1.10   | 3.95   | 2.12   | 1.28       | dep domain containing 1                                                            |
| MmugDNA_39841.1.S1_s_at | LOC698314              | LOC698314             | 7.72E-04             | 1.10   | -2.96  | 1.11   | -1.22      | hypothetical protein LOC698314                                                     |
| MmuSTS_64.1.S1_s_at     | GMNN                   | GMNN                  | 5.65E-04             | 1.09   | 2.39   | 1.61   | 1.60       | geminin, dna replication inhibitor                                                 |



| Affymetrix Probeset ID | Affymetrix Gene Symbol | Corrected Gene Symbol | ANOVA (time) P-value | D10/D0 | D14/D0 | D30/D0 | CHRONIC/DO | Gene Description                                                                |
|------------------------|------------------------|-----------------------|----------------------|--------|--------|--------|------------|---------------------------------------------------------------------------------|
| MmuSTS.3714.1.S1_at    | LOC713222              | LOC713222             | 5.26E-06             | 1.09   | 2.03   | 1.33   | -1.05      | similar to four and a half LIM domains 2                                        |
| MmuDNA.19464.1.S1_at   | LOC695531              | LOC695531             | 1.86E-06             | 1.09   | 4.94   | 2.10   | 1.42       | similar to ubiquitin-like, containing PHD and RING finger domains, 1            |
| MmuDNA.27780.1.S1_at   | ---                    | ---                   | 6.73E-06             | 1.09   | -1.65  | -1.15  | 2.26       | ---                                                                             |
| MmuDNA.28020.1.S1_at   | ---                    | ---                   | 8.14E-05             | 1.09   | 2.69   | 2.02   | 1.27       | ---                                                                             |
| MmuDNA.23593.1.S1_at   | LOC702987              | LOC702987             | 1.31E-04             | 1.09   | -2.28  | 1.08   | 1.00       | similar to protein phosphatase 1A isoform 1                                     |
| MmuDNA.39718.1.S1_at   | MKRN1                  | MKRN1                 | 5.82E-04             | 1.09   | -3.24  | 1.17   | -1.10      | makorin ring finger protein 1                                                   |
| MmuDNA.12988.1.S1_s_at | LOC703598              | LOC703598             | 3.06E-04             | 1.09   | 2.62   | 1.78   | 1.44       | similar to high-mobility group box 3                                            |
| MmuDNA.42307.1.S1_s_at | GYP A                  | GYP A                 | 8.33E-05             | 1.08   | -8.06  | -1.27  | -1.16      | glycophorin A                                                                   |
| MmuDNA.40742.1.S1_at   | LOC702184              | CENB2                 | 4.76E-06             | 1.08   | 5.89   | 2.74   | 1.66       | cyclin b2                                                                       |
| MmuSTS.3302.1.S1_at    | RWDD3                  | RWDD3                 | 7.09E-04             | 1.08   | -3.69  | -1.28  | -1.31      | RWD domain containing 3                                                         |
| MmuDNA.14322.1.S1_at   | TFDP1                  | TFDP1                 | 2.22E-03             | 1.08   | 2.35   | 1.76   | 1.39       | transcription factor dp-1                                                       |
| Mmu.14249.1.S1_at      | CCR5                   | CCR5                  | 1.46E-03             | 1.08   | 2.84   | 1.51   | 1.56       | chemokine (C-C motif) receptor 5                                                |
| MmuDNA.11557.1.S1_at   | LOC715235              | NCAPG                 | 8.19E-06             | 1.08   | 4.49   | 2.43   | 1.85       | chromosome condensation protein g                                               |
| MmuDNA.42135.1.S1_at   | FBXO5                  | FBXO5                 | 4.22E-04             | 1.08   | 2.01   | 1.32   | 1.27       | F-box protein 5                                                                 |
| MmuDNA.12490.1.S1_at   | LOC702368              | E2F8                  | 2.11E-05             | 1.08   | 4.53   | 2.10   | 1.55       | e2f transcription factor 8                                                      |
| MmuSTS.1955.1.S1_at    | RTN4                   | RTN4                  | 7.90E-06             | 1.08   | 2.24   | 1.57   | 1.17       | Reticulon 4                                                                     |
| MmuSTS.4250.1.S1_at    | RADS1AP1               | RADS1AP1              | 1.79E-05             | 1.08   | 2.87   | 1.75   | 1.59       | RADS1 associated protein 1                                                      |
| MmuSTS.9111.1.S1_at    | LOC695383              | ALDH9A1               | 2.10E-04             | 1.08   | 2.62   | 1.59   | 1.72       | aldehyde dehydrogenase 9 family, member a1                                      |
| MmuDNA.21403.1.S1_at   | LOC722088              | CDC3                  | 1.58E-04             | 1.08   | 3.03   | 2.39   | 1.26       | cell division cycle associated 3                                                |
| MmuDNA.39842.1.S1_s_at | LOC698314              | LOC698314             | 1.06E-03             | 1.08   | -3.42  | 1.05   | -1.15      | hypothetical protein LOC698314                                                  |
| MmuSTS.2109.1.S1_at    | LOC709167              | LOC709167             | 2.67E-06             | 1.08   | -1.47  | -1.26  | 2.91       | similar to ADP-ribosylation factor-like 4D                                      |
| MmuDNA.20818.1.S1_s_at | NR4A2                  | NR4A2                 | 4.18E-04             | 1.07   | -1.02  | -1.21  | 2.07       | nuclear receptor subfamily 4, group A, member 2                                 |
| Mmu.8739.1.S1_at       | LOC701021              | LOC701021             | 4.29E-04             | 1.07   | -2.11  | 1.06   | -1.16      | similar to cellular repressor of E1A-stimulated genes                           |
| MmuDNA.1969.1.S1_at    | LOC714686              | MCM4                  | 7.37E-05             | 1.07   | 4.04   | 1.92   | 1.40       | mcm4 minichromosome maintenance deficient 4 (s. cerevisiae)                     |
| MmuDNA.16923.1.S1_at   | NF-AT                  | NF-AT                 | 4.48E-04             | 1.07   | 1.00   | 1.31   | 2.23       | transmembrane activator                                                         |
| MmuDNA.30751.1.S1_s_at | LOC693614              | LOC693614             | 1.85E-03             | 1.07   | -2.62  | 1.03   | -1.24      | similar to CG14209-PD, isoform D                                                |
| MmuDNA.18794.1.S1_at   | ---                    | ---                   | 3.77E-05             | 1.07   | 5.16   | 2.57   | 1.64       | cdc20 cell division cycle 20 homolog (s. cerevisiae)                            |
| MmuSTS.3320.1.S1_at    | LOC700382              | LOC700382             | 4.49E-05             | 1.07   | 3.88   | 1.83   | 1.52       | similar to cyclin E2 isoform 1                                                  |
| MmuDNA.23023.1.S1_at   | ---                    | ---                   | 2.09E-05             | 1.07   | 2.45   | 1.54   | 1.21       | ---                                                                             |
| MmuDNA.9920.1.S1_at    | ---                    | ---                   | 2.42E-03             | 1.07   | -2.27  | 1.13   | -1.15      | ---                                                                             |
| MmuDNA.12791.1.S1_at   | LIPF                   | LIPF                  | 2.22E-03             | 1.07   | -4.23  | 1.11   | -1.19      | Lipase, gastric                                                                 |
| MmuSTS.3707.1.S1_at    | PSMD9                  | PSMD9                 | 3.01E-03             | 1.07   | -3.33  | 1.15   | -1.48      | proteasome (prosome, macropain) 26S subunit, non-ATPase, 9                      |
| MmuSTS.636.1.S1_at     | LOC699182              | LOC699182             | 3.22E-03             | 1.07   | -3.08  | 1.24   | -1.11      | similar to tripartite motif-containing 58                                       |
| MmuDNA.22284.1.S1_at   | LOC704611              | LOC704611             | 1.10E-03             | 1.07   | -1.56  | -1.13  | 2.18       | similar to junctophilin 3                                                       |
| MmuDNA.19272.1.S1_s_at | LOC709633              | LOC709633             | 3.43E-04             | 1.06   | 3.37   | 1.72   | 1.37       | Hypothetical protein LOC709633                                                  |
| MmuSTS.3576.1.S1_at    | CCNA2                  | CCNA2                 | 2.51E-04             | 1.06   | 3.45   | 1.94   | 1.57       | cyclin a2                                                                       |
| MmuDNA.41567.1.S1_at   | LOC718784              | LOC718784             | 4.73E-03             | 1.06   | 1.01   | 1.32   | 2.36       | similar to Fc receptor-like 4                                                   |
| MmuDNA.35455.1.S1_at   | ---                    | ---                   | 3.40E-06             | 1.06   | -1.30  | -1.28  | 2.11       | ---                                                                             |
| MmuDNA.12273.1.S1_at   | TOP2A                  | TOP2A                 | 2.10E-06             | 1.06   | 3.77   | 2.32   | 1.56       | topoisomerase (dna) II alpha 170kDa                                             |
| MmuDNA.14959.1.S1_at   | CDC2                   | CDC2                  | 2.89E-04             | 1.06   | 2.11   | 1.40   | 1.30       | cell division cycle 2, G1 to S and G2 to M                                      |
| MmuDNA.38956.1.S1_at   | ---                    | NUSAP1                | 9.61E-07             | 1.05   | 3.81   | 2.30   | 1.60       | nucleolar and spindle associated protein 1                                      |
| MmuSTS.1462.1.S1_at    | LOC707432              | LOC707432             | 1.57E-03             | 1.05   | -2.42  | 1.51   | -1.47      | similar to PDZ domain protein GIPC2                                             |
| MmuDNA.38659.1.S1_at   | CDIPT                  | CDIPT                 | 3.99E-04             | 1.05   | -2.43  | -1.03  | -1.07      | CDP-diacylglycerol-inositol 3-phosphatidyltransferase (phosphatidylinositol syn |
| MmuDNA.8691.1.S1_at    | LOC706985              | LOC706985             | 1.00E-03             | 1.05   | -4.35  | 1.36   | -1.11      | similar to alpha-synuclein isoform NACP140                                      |
| MmuDNA.42865.1.S1_at   | CDC2                   | CDC2                  | 7.13E-06             | 1.05   | 2.57   | 1.49   | 1.25       | cell division cycle 2, G1 to S and G2 to M                                      |
| MmuSTS.3401.1.S1_s_at  | LOC717153              | LOC717153             | 4.95E-05             | 1.05   | 2.05   | 1.19   | -1.14      | similar to CCAAT/enhancer-binding protein alpha (C/EBP alpha)                   |
| MmuDNA.10448.1.S1_at   | PRPF18                 | PRPF18                | 4.65E-03             | 1.05   | -2.47  | 1.20   | -1.07      | PRPF18 pre-mRNA processing factor 18 homolog                                    |
| MmuDNA.5568.1.S1_at    | LOC701134              | LOC701134             | 3.42E-04             | 1.05   | -3.07  | -1.08  | -1.11      | similar to faciogenital dysplasia protein                                       |
| MmuDNA.2444.1.S1_at    | LOC699723              | LOC699723             | 6.20E-03             | 1.05   | -2.46  | 1.31   | -1.24      | similar to LOC17712-PA                                                          |
| MmuDNA.25436.1.S1_at   | MCM3                   | MCM3                  | 2.05E-04             | 1.04   | 3.18   | 1.64   | 1.42       | minichromosome maintenance complex component 3                                  |
| MmuDNA.602.1.S1_at     | LOC717799              | LOC717799             | 2.95E-04             | 1.04   | 2.01   | -1.06  | -1.10      | similar to neural stem cell-derived dendrite regulator                          |
| MmuDNA.20683.1.S1_at   | ---                    | ---                   | 2.09E-04             | 1.04   | 2.01   | 1.20   | 1.04       | ---                                                                             |
| MmuDNA.5308.1.S1_at    | LOC709463              | LOC709463             | 4.45E-03             | 1.04   | 2.10   | 1.05   | 1.03       | similar to tetraspan 2                                                          |
| MmuSTS.2509.1.S1_at    | LOC701863              | LOC701863             | 1.12E-04             | 1.04   | 2.04   | 1.34   | 1.13       | similar to H2A histone family, member J isoform 1                               |
| MmuDNA.2951.1.S1_at    | LOC706404              | LOC706404             | 8.26E-06             | 1.04   | 2.31   | 1.51   | 1.15       | similar to anillin, actin binding protein (scraps homolog, Drosophila)          |
| MmuDNA.3614.1.S1_at    | LOC719817              | LOC719817             | 4.07E-03             | 1.04   | -2.28  | 1.44   | 1.06       | similar to sudD suppressor of bimD6 homolog isoform 1                           |
| MmuDNA.19989.1.S1_at   | LOC702520              | LOC702520             | 5.87E-03             | 1.03   | 3.00   | 1.63   | 1.35       | similar to defective in sister chromatid cohesion homolog 1                     |
| MmuSTS.3129.1.S1_at    | RGS8                   | RGS8                  | 3.80E-09             | 1.03   | -1.00  | -1.17  | 2.78       | regulator of G-protein signaling 8                                              |
| MmuDNA.39842.1.S1_at   | LOC698314              | LOC698314             | 4.43E-04             | 1.03   | -2.78  | 1.03   | -1.15      | hypothetical protein LOC698314                                                  |
| MmuSTS.2070.1.S1_s_at  | MICB                   | MICB                  | 6.41E-05             | 1.03   | 2.66   | 1.61   | 1.22       | MHC class I polypeptide-related sequence B                                      |
| MmuDNA.10186.1.S1_at   | ---                    | CASC5                 | 6.54E-04             | 1.03   | 2.36   | 1.60   | 1.83       | cancer susceptibility candidate 5                                               |
| MmuSTS.1554.1.S1_at    | ---                    | ---                   | 2.22E-04             | 1.03   | 1.00   | -1.11  | 2.59       | ---                                                                             |
| MmuDNA.24430.1.S1_at   | LOC710858              | LOC710858             | 1.30E-04             | 1.03   | 3.16   | 1.99   | 1.54       | similar to cell division cycle 25A isoform a                                    |
| MmuDNA.27170.1.S1_at   | LOC715385              | LOC715385             | 1.37E-03             | 1.02   | -3.01  | 1.34   | -1.09      | similar to nudix-type motif 4 isoform alpha                                     |
| MmuSTS.2698.1.S1_at    | LOC698482              | LOC698482             | 3.39E-04             | 1.02   | 2.07   | 1.68   | 1.17       | similar to Histone H2B F (H2B 291A)                                             |
| Mmunews.760.1.S1_at    | LOC717153              | LOC717153             | 1.19E-05             | 1.02   | 2.02   | 1.32   | -1.10      | similar to CCAAT/enhancer-binding protein alpha (C/EBP alpha)                   |
| Mmu.7460.4.S1_a_at     | KIR2DL4 // KIR3DH5     | KIR2DL4 // KIR3DH5    | 8.70E-04             | 1.02   | 3.20   | 1.31   | 1.05       | killer cell immunoglobulin-like receptor, two domains, long cytoplasmic tail, 4 |
| MmuDNA.30535.1.S1_at   | ANKRD6                 | ANKRD6                | 1.01E-03             | 1.02   | -3.11  | 1.28   | -1.10      | ankyrin repeat domain 6                                                         |
| MmuDNA.26592.1.S1_at   | EPBA1                  | EPBA1                 | 2.29E-03             | 1.02   | -3.63  | 1.26   | -1.17      | erythrocyte membrane protein band 4.1 (elliptocytosis 1, RH-linked)             |
| MmuDNA.25197.1.S1_at   | ASP M                  | ASP M                 | 1.06E-04             | 1.02   | 2.44   | 1.78   | 1.22       | hypothetical protein flj10517                                                   |
| MmuDNA.3558.1.S1_at    | AURKA                  | AURKA                 | 1.42E-06             | 1.02   | 3.17   | 1.60   | 1.15       | serine/threonine protein kinase 6                                               |
| MmuDNA.22893.1.S1_at   | ---                    | ---                   | 1.08E-04             | 1.02   | -1.27  | 1.01   | 2.26       | ---                                                                             |
| MmuSTS.3643.1.S1_at    | CHIT1                  | CHIT1                 | 6.07E-04             | 1.02   | 5.20   | 1.39   | -1.39      | chitinase 1 (chitotriodase)                                                     |
| MmuDNA.31059.1.S1_s_at | PTTG1                  | PTTG1                 | 1.92E-04             | 1.02   | 2.45   | 1.46   | 1.23       | pituitary tumor-transforming 1                                                  |
| MmuSTS.2303.1.S1_s_at  | LOC696772              | LOC696772             | 5.49E-05             | 1.01   | 2.59   | 1.34   | 1.23       | similar to discs large homolog 7                                                |
| MmuSTS.4324.1.S1_at    | ENTPD3                 | ENTPD3                | 4.20E-03             | 1.01   | 2.53   | 1.03   | -1.12      | ectonucleoside triphosphate diphosphohydrolase 3                                |
| MmuDNA.6172.1.S1_at    | ---                    | ---                   | 1.33E-03             | 1.01   | -4.69  | 1.52   | 1.04       | ---                                                                             |
| MmuDNA.14956.1.S1_at   | LOC700081              | LOC700081             | 1.70E-06             | 1.01   | 2.29   | 1.47   | 1.22       | similar to CDC6 homolog                                                         |
| MmuSTS.2201.1.S1_at    | LOC710099              | LOC710099             | 2.09E-04             | 1.01   | 2.26   | 1.50   | 1.43       | similar to SCL/TAL1 interrupting locus                                          |
| MmuDNA.12081.1.S1_at   | ---                    | ---                   | 3.40E-03             | 1.01   | 2.32   | 1.43   | 1.10       | ---                                                                             |
| MmuDNA.38891.1.S1_at   | ATPIF1                 | ATPIF1                | 2.99E-04             | 1.01   | 2.49   | 1.17   | 1.12       | ATPase inhibitory factor 1                                                      |
| MmuDNA.3918.1.S1_at    | DCLRE1A                | DCLRE1A               | 6.28E-03             | 1.01   | -2.63  | 1.13   | -1.07      | DNA cross-link repair 1A (PSO2 homolog, S. cerevisiae)                          |
| MmuDNA.31383.1.S1_at   | SESN3                  | SESN3                 | 3.23E-03             | 1.01   | -3.60  | 1.62   | 1.06       | sestrin 3                                                                       |
| MmuSTS.2071.1.S1_at    | RAD54L                 | RAD54L                | 2.94E-05             | 1.01   | 3.17   | 1.44   | 1.09       | RAD54-like protein                                                              |
| MmuSTS.3510.1.S1_at    | ---                    | ---                   | 8.08E-04             | 1.01   | -5.23  | -1.05  | -1.18      | ---                                                                             |
| MmuSTS.4399.1.S1_at    | LOC719808              | LOC719808             | 1.51E-05             | 1.01   | 2.16   | 1.36   | 1.21       | similar to cell division cycle associated 8                                     |
| MmuDNA.43588.1.S1_at   | LOC712570              | LOC712570             | 1.80E-07             | 1.01   | 2.38   | 1.58   | 1.24       | hypothetical protein LOC712570                                                  |
| Mmu.7460.4.S1_x_at     | KIR2DL4                | KIR2DL4               | 1.02E-03             | 1.01   | 2.88   | 1.26   | -1.04      | killer cell immunoglobulin-like receptor, two domains, long cytoplasmic tail, 4 |
| MmuDNA.15236.1.S1_at   | TIMM17A                | TIMM17A               | 9.47E-07             | 1.01   | -1.16  | -1.36  | 4.83       | Translocase of inner mitochondrial membrane 17 A-like protein                   |
| MmuDNA.40365.1.S1_at   | LOC716378              | LOC716378             | 3.05E-06             | 1.01   | -1.42  | 1.57   | 4.32       | similar to activation-induced cytidine deaminase                                |
| Mmu.9793.1.S1_at       | LOC703475              | LOC703475             | 4.98E-03             | 1.00   | -3.06  | 1.11   | 1.10       | similar to chloride intracellular channel 2                                     |
| MmuSTS.3146.1.S1_s_at  | MCM5                   | MCM5                  | 6.36E-05             | 1.00   | 2.94   | 1.56   | 1.49       | minichromosome maintenance deficient protein 5                                  |
| MmuDNA.31878.1.S1_at   | GYP A                  | GYP A                 | 6.13E-04             | 1.00   | -5.97  | -1.03  | -1.13      | glycophorin A                                                                   |
| MmuDNA.8306.1.S1_at    | ---                    | ---                   | 4.91E-06             | 1.00   | -1.37  | 1.09   | 2.36       | ---                                                                             |
| MmuDNA.3247.1.S1_s_at  | LOC704341              | HIST2H4B              | 2.54E-03             | 1.00   | 2.07   | 1.53   | 1.23       | H4 histone, family 2                                                            |

Supplementary Table S5, part 6 of 9

| Affymetrix Probeset ID  | Affymetrix Gene Symbol | Corrected Gene Symbol  | ANOVA (time) P-value | D10/D0 | D14/D0 | D30/D0 | CHRONIC/DO | Gene Description                                                                 |
|-------------------------|------------------------|------------------------|----------------------|--------|--------|--------|------------|----------------------------------------------------------------------------------|
| MmugDNA.34901.1.S1_at   | SDF2L1                 | SDF2L1                 | 1.59E-03             | 1.00   | 2.05   | 1.30   | 1.30       | stromal cell-derived factor 2-like 1                                             |
| MmugDNA.14606.1.S1_at   | LOC699334              | LOC699334              | 1.13E-03             | 1.00   | 2.24   | -1.02  | 1.16       | similar to prohibitin                                                            |
| Mmu.11047.2.S1_s_at     | LOC711303              | LOC711303              | 1.17E-03             | -1.00  | 2.03   | 1.83   | 1.96       | ---                                                                              |
| MmuSTS.4348.1.S1_at     | IGHG1 // LOC711303     | IGHG1                  | 7.27E-04             | -1.00  | 3.04   | 2.37   | 2.71       | immunoglobulin heavy constant gamma 1 (g1m marker)                               |
| MmuSTS.1653.1.S1_at     | TMPRSS3                | TMPRSS3                | 1.18E-05             | -1.01  | 2.33   | 1.79   | 1.32       | serine protease tadg12                                                           |
| MmugDNA.2975.1.S1_at    | LOC707526              | POLE2                  | 8.84E-06             | -1.01  | 2.50   | 1.64   | 1.46       | polymerase (dna directed), epsilon 2 (p59 subunit)                               |
| MmugDNA.35622.1.S1_at   | ---                    | ---                    | 2.20E-04             | -1.01  | 2.35   | 1.56   | 1.17       | ---                                                                              |
| MmugDNA.14691.1.S1_at   | LOC703475              | LOC703475              | 1.30E-03             | -1.01  | 3.72   | 1.01   | -1.10      | similar to chloride intracellular channel 2                                      |
| MmugDNA.31030.1.S1_at   | LOC703497              | LOC703497              | 3.07E-05             | -1.01  | 2.13   | 1.21   | 1.13       | similar to prematurely terminated mRNA decay factor-like                         |
| MmuSTS.644.1.S1_at      | SDHD                   | SDHD                   | 7.32E-06             | -1.01  | 2.61   | 1.63   | 1.23       | Succinate dehydrogenase complex, subunit D, integral membrane protein            |
| MmugDNA.8750.1.S1_at    | LOC704050              | LOC704050              | 6.71E-04             | -1.01  | 2.66   | 1.34   | 1.21       | similar to PHD finger protein 19 isoform a                                       |
| MmugDNA.2951.1.S1_s_at  | LOC706404              | LOC706404              | 2.95E-05             | -1.01  | 4.27   | 2.07   | 1.30       | similar to anillin, actin binding protein (scraps homolog, Drosophila)           |
| MmugDNA.31188.1.S1_at   | LOC718626              | LOC718626              | 1.27E-04             | -1.02  | -1.50  | -1.26  | 2.21       | similar to leucine zipper protein 1                                              |
| MmuSTS.3934.1.S1_at     | LOC713447              | LOC713447              | 1.52E-06             | -1.03  | -1.66  | -1.15  | 2.31       | similar to collagen, type VIII, alpha 2                                          |
| MmugDNA.6734.1.S1_at    | LOC711291              | LOC711291              | 4.34E-04             | -1.03  | 3.57   | 1.18   | -1.45      | similar to CD177 antigen                                                         |
| MmugDNA.7117.1.S1_at    | LOC714792              | LOC714792              | 4.82E-03             | -1.03  | 2.68   | 1.29   | -1.20      | hypothetical protein LOC714792                                                   |
| MmugDNA.5663.1.S1_at    | PLS3                   | PLS3                   | 7.93E-05             | -1.03  | 2.14   | 1.29   | 1.11       | plastin 3 (t isoform)                                                            |
| MmuSTS.3773.1.S1_at     | RNF11                  | RNF11                  | 5.15E-03             | -1.03  | -2.72  | 1.20   | 1.00       | ring finger protein 11                                                           |
| MmugDNA.20354.1.S1_at   | LOC712046              | LOC712046              | 3.86E-05             | -1.04  | 4.64   | 1.05   | -1.20      | similar to Interleukin 18 receptor accessory protein precursor                   |
| MmuSTS.2645.1.S1_at     | LOC708959              | LOC708959              | 2.77E-06             | -1.04  | 2.51   | 1.47   | 1.28       | Similar to Protein KIAA0329/KIAA0297                                             |
| MmuSTS.4762.1.S1_at     | FBX05                  | FBX05                  | 2.71E-04             | -1.04  | 3.14   | 1.39   | 1.31       | F-box protein 5                                                                  |
| MmugDNA.19008.1.S1_at   | LOC710142              | LOC710142              | 4.86E-04             | -1.04  | 2.23   | 1.06   | 1.06       | similar to solute carrier family 39 (zinc transporter), member 8                 |
| MmuSTS.4722.1.S1_at     | LOC709328              | LOC709328              | 1.53E-03             | -1.05  | 2.73   | 1.85   | 1.30       | similar to thyroid hormone receptor interactor 13                                |
| MmugDNA.865.1.S1_at     | PCNA                   | PCNA                   | 3.09E-04             | -1.05  | 2.15   | 1.38   | 1.31       | proliferating cell nuclear antigen                                               |
| MmuSTS.1779.1.S1_at     | ---                    | ---                    | 3.42E-04             | -1.05  | 3.69   | 2.69   | 1.58       | nima (never in mitosis gene a)-related kinase 2                                  |
| MmuSTS.236.1.S1_at      | LOC703598              | LOC703598              | 4.55E-07             | -1.05  | 2.52   | 1.74   | 1.34       | similar to high-mobility group box 3                                             |
| MmugDNA.14204.1.S1_at   | GZMB                   | GZMB                   | 1.39E-03             | -1.05  | 3.21   | 1.09   | 1.35       | granzyme B (granzyme 2, cytotoxic T-lymphocyte-associated serine esterase 1)     |
| MmugDNA.32420.1.S1_at   | LOC719817              | LOC719817              | 6.50E-03             | -1.05  | -2.39  | 1.28   | 1.04       | similar to sudD suppressor of binD6 homolog isoform 1                            |
| MmuSTS.673.1.S1_at      | LOC721861              | LOC721861              | 6.87E-05             | -1.06  | 2.44   | 1.23   | 1.22       | similar to Chromatin assembly factor 1, subunit A (p150)                         |
| MmugDNA.23764.1.S1_at   | CCNA2                  | CCNA2                  | 5.92E-06             | -1.06  | 2.50   | 1.52   | 1.39       | cyclin A                                                                         |
| MmugDNA.14257.1.S1_at   | CCNF                   | CCNF                   | 3.17E-06             | -1.06  | 3.16   | 1.41   | 1.12       | cyclin F                                                                         |
| MmugDNA.15585.1.S1_at   | HSF4                   | KIF15                  | 3.92E-07             | -1.06  | 4.82   | 2.77   | 1.55       | kinesin family member 15                                                         |
| MmuSTS.1332.1.S1_at     | LOC695759              | LOC695759              | 6.14E-03             | -1.06  | -4.95  | 1.15   | -1.31      | similar to ferrocyclase isoform a precursor                                      |
| MmuSTS.36434.1.S1_at    | ---                    | GZMA                   | 3.58E-06             | -1.06  | 12.81  | 2.54   | 2.55       | granzyme A (granzyme 1, cytotoxic T-lymphocyte-associated serine esterase 3)     |
| MmugDNA.32729.1.S1_at   | MKI67                  | MKI67                  | 4.84E-06             | -1.07  | 4.01   | 2.45   | 1.69       | antigen identified by monoclonal antibody ki-67                                  |
| MmuSTS.2244.1.S1_at     | LOC710662              | LOC710662              | 5.53E-03             | -1.07  | 2.07   | 1.15   | -1.06      | similar to plasminogen activator, urokinase receptor isoform 1 precursor         |
| MmugDNA.2694.1.S1_at    | LOC702198              | LOC702198              | 1.87E-05             | -1.07  | 3.20   | 1.96   | 1.61       | similar to ZW10 interactor (ZW10-interacting protein 1) (Zwint-1)                |
| MmugDNA.34591.1.S1_s_at | IGKC                   | IGKC                   | 1.33E-05             | -1.07  | 2.18   | 1.28   | 1.15       | Immunoglobulin kappa constant                                                    |
| MmugDNA.15250.1.S1_at   | ---                    | CENPA                  | 1.31E-05             | -1.07  | 4.38   | 2.49   | 1.61       | centromere protein a, 17kda                                                      |
| MmuSTS.177.1.S1_at      | SETBP1                 | SETBP1                 | 5.48E-05             | -1.07  | -1.39  | -1.22  | 2.12       | SET binding protein 1                                                            |
| MmugDNA.9644.1.S1_at    | LOC716378              | LOC716378              | 2.56E-07             | -1.07  | -1.83  | 1.30   | 3.68       | similar to activation-induced cytosine deaminase                                 |
| MmuSTS.1531.1.S1_at     | ---                    | ---                    | 1.87E-05             | -1.07  | 3.61   | 1.55   | 1.22       | ---                                                                              |
| MmugDNA.30410.1.S1_s_at | LOC703488              | LOC703488              | 2.55E-03             | -1.08  | 2.19   | 1.32   | 1.15       | hypothetical protein LOC703488                                                   |
| Mmu.12320.1.S1_at       | LOC719606              | LOC719606              | 1.14E-03             | -1.08  | 2.03   | 1.04   | 1.11       | similar to electron-transfer-flavoprotein, beta polypeptide isoform 1            |
| MmugDNA.6268.1.S1_at    | ---                    | ---                    | 1.69E-06             | -1.08  | -2.11  | -1.29  | 1.72       | ---                                                                              |
| MmugDNA.11747.1.S1_at   | LOC696925              | LOC696925              | 4.66E-06             | -1.08  | 3.82   | 2.08   | 1.45       | similar to MLF1 interacting protein                                              |
| MmuSTS.2700.1.S1_at     | LOC694423              | E2F7                   | 7.83E-07             | -1.08  | 3.30   | 1.71   | 1.32       | e2f transcription factor 7                                                       |
| MmugDNA.12277.1.S1_at   | TOP2A                  | TOP2A                  | 8.39E-05             | -1.08  | 2.82   | 1.81   | 1.43       | DNA topoisomerase II, alpha isozyme                                              |
| MmugDNA.41268.1.S1_at   | CCNB1                  | CCNB1                  | 2.48E-06             | -1.09  | 3.10   | 1.77   | 1.51       | cyclin B1                                                                        |
| Mmu.15886.1.S1_s_at     | LOC693464 // LOC697705 | LOC693464 // LOC697705 | 4.41E-04             | -1.09  | 2.32   | 1.07   | 1.21       | similar to Nonhistone chromosomal protein HMG-17 (High-mobility group nucleosome |
| MmugDNA.22095.1.S1_at   | LOC711012              | LOC711012              | 2.64E-05             | -1.09  | -1.54  | 1.00   | 2.83       | similar to protein phosphatase 1E                                                |
| MmuSTS.2900.1.S1_at     | LOC710216              | LOC710216              | 2.72E-04             | -1.09  | -1.33  | 1.01   | 3.28       | similar to testis zinc finger protein                                            |
| MmugDNA.19256.1.S1_s_at | ---                    | ---                    | 4.46E-04             | -1.09  | 2.23   | 1.05   | 1.02       | ---                                                                              |
| MmugDNA.17680.1.S1_at   | ---                    | ---                    | 7.60E-06             | -1.09  | 2.71   | 1.56   | 1.28       | ---                                                                              |
| MmugDNA.8226.1.S1_s_at  | LOC706985              | LOC706985              | 3.03E-03             | -1.09  | -2.58  | 1.11   | -1.17      | similar to alpha-synuclein isoform NACP140                                       |
| MmuSTS.2629.1.S1_at     | ---                    | ---                    | 4.99E-05             | -1.09  | -1.62  | -1.61  | 2.24       | ---                                                                              |
| MmugDNA.21515.1.S1_at   | ---                    | PRC1                   | 1.22E-06             | -1.09  | 2.84   | 1.68   | 1.39       | protein regulator of cytokinesis 1                                               |
| MmugDNA.36564.1.S1_at   | CAPZA2                 | CAPZA2                 | 4.02E-06             | -1.10  | 2.59   | 1.53   | 1.33       | Capping protein (actin filament) muscle Z-line, alpha 2                          |
| MmugDNA.14075.1.S1_at   | RSN                    | BUB1B                  | 7.32E-04             | -1.10  | 3.64   | 1.94   | 1.81       | bub1 budding uninhibited by benzimidazoles 1 homolog beta (yeast)                |
| MmugDNA.13584.1.S1_at   | KIF23                  | KIF23                  | 9.47E-06             | -1.10  | 2.56   | 1.64   | 1.48       | kinesin family member 23                                                         |
| MmugDNA.17329.1.S1_at   | ---                    | ---                    | 3.87E-08             | -1.10  | 3.89   | 1.90   | 1.94       | ---                                                                              |
| MmugDNA.42795.1.S1_s_at | ---                    | ---                    | 1.82E-04             | -1.11  | 2.35   | 1.01   | 1.11       | ---                                                                              |
| MmugDNA.4575.1.S1_at    | ---                    | ---                    | 2.55E-05             | -1.11  | -1.30  | -1.27  | 2.07       | ---                                                                              |
| MmugDNA.20811.1.S1_at   | ---                    | ---                    | 2.68E-04             | -1.11  | -1.37  | -1.26  | 2.50       | ---                                                                              |
| MmuSTS.3501.1.S1_at     | LOC722848              | LOC722848              | 1.52E-03             | -1.11  | 2.29   | 1.06   | -1.34      | similar to ADP-ribosyl cyclase 2 precursor (Cyclic ADP-ribose hydrolase 2) (cADP |
| MmugDNA.13565.1.S1_at   | ---                    | KIF11                  | 1.05E-05             | -1.12  | 4.25   | 2.02   | 1.97       | kinesin family member 11                                                         |
| MmuSTS.61.1.S1_at       | LOC701598              | LOC701598              | 6.72E-04             | -1.12  | 2.05   | 1.23   | 1.58       | similar to helicase, lymphoid-specific                                           |
| MmugDNA.31059.1.S1_at   | PTTG1                  | PTTG1                  | 6.32E-05             | -1.13  | 2.24   | 1.30   | 1.26       | pituitary tumor-transforming 1                                                   |
| MmuSTS.711.1.S1_at      | ---                    | ---                    | 3.50E-04             | -1.13  | -1.61  | -1.16  | 2.56       | ---                                                                              |
| MmuNewRS.781.1.S1_s_at  | LOC712849              | LOC712849              | 6.67E-06             | -1.13  | 3.12   | -1.04  | 1.16       | similar to High mobility group protein B1 (High mobility group protein 1) (HMG-1 |
| MmugDNA.16319.1.S1_at   | LOC697531              | LOC697531              | 1.06E-03             | -1.13  | 3.63   | 1.05   | -1.17      | Similar to Importin alpha-2 subunit (Karyopherin alpha-2 subunit) (SRP1-alpha) ( |
| MmugDNA.29822.1.S1_at   | CA4                    | CA4                    | 9.09E-05             | -1.13  | 3.38   | 1.22   | -1.45      | carbonic anhydrase IV                                                            |
| MmuSTS.2959.1.S1_at     | LOC706847              | LOC706847              | 1.18E-04             | -1.13  | -16.68 | -1.04  | 1.02       | similar to acyl-CoA synthetase long-chain family member 6 isoform b              |
| MmugDNA.18520.1.S1_at   | LOC697160              | LOC697160              | 4.11E-08             | -1.14  | -1.36  | 1.06   | 2.16       | similar to ATP-binding cassette, sub-family C, member 4                          |
| MmuSTS.2615.1.S1_at     | ---                    | ---                    | 2.54E-03             | -1.14  | -2.02  | 1.03   | -1.10      | ---                                                                              |
| MmugDNA.701.1.S1_at     | ---                    | ---                    | 2.43E-03             | -1.14  | -7.16  | -1.04  | -1.29      | ---                                                                              |
| MmuSTS.2130.1.S1_s_at   | S100A9                 | S100A9                 | 1.86E-04             | -1.14  | 2.91   | 1.05   | -1.04      | S100 calcium binding protein A9                                                  |
| MmuSTS.8.1.S1_at        | LOC696629              | LOC696629              | 1.26E-05             | -1.14  | 2.23   | 1.30   | 1.12       | Similar to Histone H2A type 1-C                                                  |
| MmugDNA.25187.1.S1_at   | ---                    | ---                    | 4.92E-05             | -1.15  | 3.01   | 1.31   | 1.44       | ---                                                                              |
| MmuNewRS.661.1.S1_at    | LOC696253              | LOC696253              | 1.83E-05             | -1.15  | 3.07   | 2.37   | 1.70       | similar to germinal histone H4 gene                                              |
| Mmu.3274.1.S1_at        | ---                    | ---                    | 1.80E-03             | -1.15  | 4.06   | 1.00   | -1.06      | ---                                                                              |
| MmugDNA.14323.1.S1_at   | SIGLEC6                | SIGLEC6                | 5.37E-06             | -1.16  | -1.36  | -1.19  | 2.48       | sialic acid binding Ig-like lectin 6                                             |
| MmugDNA.16529.1.S1_at   | ---                    | ---                    | 5.05E-04             | -1.16  | -1.08  | 1.17   | 2.48       | ---                                                                              |
| MmugDNA.7428.1.S1_at    | LOC712618              | LOC712618              | 1.56E-05             | -1.16  | 2.05   | 1.18   | 1.28       | similar to Wolf-Hirschhorn syndrome candidate 1 protein isoform 1                |
| MmugDNA.3623.1.S1_at    | ---                    | ---                    | 2.22E-03             | -1.16  | -2.23  | 1.04   | 1.02       | ---                                                                              |
| MmugDNA.18123.1.S1_at   | LOC708774              | LOC708774              | 1.08E-04             | -1.16  | 2.11   | 1.37   | 1.14       | Hypothetical protein LOC708774                                                   |
| MmugDNA.18586.1.S1_at   | SMC2                   | SMC2                   | 9.53E-05             | -1.17  | 2.98   | 1.72   | 1.54       | structural maintenance of chromosomes 2                                          |
| MmugDNA.11652.1.S1_at   | LOC695759              | LOC695759              | 6.39E-03             | -1.17  | -2.76  | 1.16   | -1.03      | similar to ferrocyclase isoform a precursor                                      |
| MmuSTS.2672.1.S1_at     | LOC709000              | LOC709000              | 2.07E-05             | -1.17  | 2.34   | 1.37   | 1.61       | similar to centromere protein F (350/400kD)                                      |
| MmugDNA.26023.1.S1_at   | LOC704646              | LOC704646              | 1.87E-06             | -1.17  | 4.75   | 1.29   | -1.12      | similar to mast cell-expressed membrane protein 1                                |
| MmugDNA.30376.1.S1_at   | IGKC                   | IGKC                   | 1.07E-05             | -1.17  | 2.75   | 1.30   | 1.13       | Immunoglobulin kappa constant                                                    |
| MmugDNA.41835.1.S1_at   | LOC702446              | LOC702446              | 2.77E-06             | -1.18  | 3.05   | 1.46   | 1.27       | similar to Dihydrofolate reductase                                               |
| MmugDNA.40649.1.S1_at   | LOC704221              | LOC704221              | 4.60E-03             | -1.18  | -4.32  | 1.04   | -1.37      | similar to spectrin domain with coiled-coils 1 NSP5a3a                           |
| MmugDNA.24595.1.S1_at   | ---                    | ---                    | 1.88E-03             | -1.18  | 3.31   | 2.36   | -1.65      | ---                                                                              |
| Mmu.5569.1.S1_at        | LOC710040              | LOC710040              | 2.39E-04             | -1.18  | -1.54  | -1.37  | 2.18       | similar to B-cell scaffold protein with ankyrin repeats 1                        |

| Alfymetrix Probeset ID | Alfymetrix Gene Symbol | Corrected Gene Symbol | ANOVA (time) P-value | D10/D0 | D14/D0 | D30/D0 | CHRONIC/DO | Gene Description                                                                 |
|------------------------|------------------------|-----------------------|----------------------|--------|--------|--------|------------|----------------------------------------------------------------------------------|
| MmuSTS.1347.1.S1_at    | LOC697057              | LOC697057             | 7.26E-07             | -1.18  | 2.41   | 1.30   | 1.22       | similar to high-mobility group box 2                                             |
| MmuSTS.4593.1.S1_at    | LOC707336              | LOC707336             | 4.76E-06             | -1.19  | -1.38  | -1.23  | 2.08       | similar to transducin-like enhancer protein 1                                    |
| MmuDNA.11398.1.S1_s_at | DONSON                 | DONSON                | 5.27E-04             | -1.19  | 2.05   | 1.08   | 1.33       | downstream neighbor of SON                                                       |
| MmuDNA.11389.1.S1_at   | LOC705913              | LOC705913             | 2.85E-03             | -1.19  | 2.07   | 1.11   | -1.17      | similar to cytidine deaminase                                                    |
| MmuDNA.17821.1.S1_at   | S100A8                 | S100A8                | 1.87E-03             | -1.19  | -2.30  | -1.07  | 1.02       | ---                                                                              |
| MmuSTS.2886.1.S1_at    | LOC714145              | LOC714145             | 2.46E-06             | -1.20  | 2.14   | 1.30   | 1.07       | Hypothetical protein LOC714145                                                   |
| MmuDNA.32221.1.S1_at   | LOC694209              | LOC694209             | 4.02E-03             | -1.20  | -1.22  | -1.01  | 2.18       | similar to Protein FAM3C precursor (Protein GS3786)                              |
| MmuDNA.17376.1.S1_at   | S100A8                 | S100A8                | 8.92E-04             | -1.20  | 3.41   | 1.42   | -1.01      | s100 calcium binding protein a8 (calgranulin a)                                  |
| MmuDNA.16198.1.S1_at   | ---                    | ---                   | 2.47E-06             | -1.20  | -1.30  | -1.19  | 2.01       | ---                                                                              |
| MmuDNA.24286.1.S1_at   | F2RL1                  | F2RL1                 | 8.14E-05             | -1.20  | -1.74  | -1.44  | 2.81       | coagulation factor II (thrombin) receptor-like 1                                 |
| MmuDNA.6381.1.S1_at    | LOC704850              | LOC704850             | 4.97E-04             | -1.20  | 2.26   | 1.01   | 1.21       | similar to cystatin F                                                            |
| MmuDNA.19727.1.S1_at   | LOC694428              | LOC694428             | 1.72E-03             | -1.21  | -1.45  | -1.34  | 2.38       | similar to chemokine orphan receptor 1                                           |
| MmuDNA.32264.1.S1_at   | LOC706017              | LOC706017             | 1.72E-03             | -1.22  | -5.54  | 1.39   | 1.02       | similar to G protein-coupled receptor 126 alpha 2                                |
| MmuDNA.3247.1.S1_at    | LOC704341              | HIST2H4B              | 1.00E-04             | -1.22  | 2.18   | 1.62   | 1.28       | H4 histone, family 2                                                             |
| MmuSTS.3318.1.S1_at    | CCNB1                  | CCNB1                 | 1.97E-05             | -1.22  | 2.25   | 1.29   | 1.19       | cyclin B1                                                                        |
| MmuDNA.22076.1.S1_at   | LOC693572              | MGC29506              | 6.07E-03             | -1.23  | 2.15   | 2.20   | 1.67       | proapoptotic caspase adaptor protein                                             |
| MmuDNA.6706.1.S1_at    | LOC693531              | CKAP2                 | 9.83E-06             | -1.23  | 3.15   | 1.97   | 1.33       | cytoskeleton associated protein 2                                                |
| MmuSTS.4157.1.S1_at    | LOC708574              | MAD2L1                | 1.40E-05             | -1.23  | 2.98   | 1.73   | 1.59       | mad2 mitotic arrest deficient-like 1 (yeast)                                     |
| MmuDNA.43394.1.S1_at   | LOC698684              | LOC698684             | 2.90E-08             | -1.24  | 2.68   | 1.06   | 1.18       | Similar to 60S ribosomal protein L26                                             |
| MmuDNA.41790.1.S1_at   | ---                    | ---                   | 3.12E-04             | -1.24  | 2.09   | 1.10   | -1.08      | ---                                                                              |
| MmuDNA.22516.1.S1_at   | LOC718589              | LOC718589             | 3.37E-06             | -1.24  | -1.40  | -1.01  | 2.74       | Similar to quiescin Q6 isoform a                                                 |
| MmuDNA.15415.1.S1_at   | ---                    | ---                   | 1.00E-04             | -1.25  | -1.22  | -1.26  | 2.25       | ---                                                                              |
| MmuDNA.17887.1.S1_s_at | NUCB2                  | NUCB2                 | 2.27E-04             | -1.25  | 2.01   | -1.01  | 1.10       | nucleobindin 2                                                                   |
| MmuDNA.41593.1.S1_at   | ---                    | ---                   | 1.05E-05             | -1.25  | -2.36  | -1.97  | 1.20       | ---                                                                              |
| MmuSTS.2958.1.S1_at    | LOC698034              | LOC698034             | 8.81E-05             | -1.26  | -1.55  | -1.31  | 3.33       | Similar to Fructose-bisphosphate aldolase A (Muscle-type aldolase) (Lung cancer  |
| MmuDNA.38781.1.S1_at   | LOC698390              | LOC698390             | 5.86E-03             | -1.29  | 2.03   | 2.15   | 1.65       | ---                                                                              |
| MmuDNA.10899.1.S1_s_at | ANKRD6                 | ANKRD6                | 6.23E-03             | -1.30  | -3.24  | 1.08   | -1.27      | ankyrin repeat domain 6                                                          |
| MmuDNA.303.1.S1_at     | LOC699624              | LOC699624             | 2.40E-05             | -1.30  | 2.19   | 1.20   | 1.30       | similar to coiled-coil domain containing 99                                      |
| MmuDNA.24148.1.S1_at   | ---                    | ---                   | 2.19E-03             | -1.31  | -3.71  | -1.00  | -1.10      | ---                                                                              |
| MmuDNA.21710.1.S1_at   | LOC706506              | LOC706506             | 4.39E-03             | -1.32  | -5.95  | -1.03  | -1.04      | similar to leucine rich repeat containing 35                                     |
| MmuDNA.10786.1.S1_at   | LOC699208              | LOC699208             | 1.43E-05             | -1.32  | 2.08   | -1.01  | 1.23       | hypothetical protein LOC699208                                                   |
| MmuDNA.32373.1.S1_at   | ---                    | ---                   | 2.40E-04             | -1.32  | -1.87  | -1.21  | 3.14       | ---                                                                              |
| MmuDNA.34165.1.S1_at   | ---                    | ---                   | 1.58E-04             | -1.34  | 3.00   | 1.15   | -1.18      | ---                                                                              |
| MmuDNA.40591.1.S1_s_at | CYP3A5                 | CYP3A5                | 1.02E-04             | -1.35  | 2.14   | 1.17   | 1.07       | cytochrome P450, family 3, subfamily A, polypeptide 5                            |
| MmuDNA.25319.1.S1_at   | LOC707116              | LOC707116             | 3.53E-05             | -1.36  | -1.68  | -1.54  | 2.75       | similar to SRY (sex determining region Y)-box 5 isoform a                        |
| MmuDNA.18443.1.S1_at   | ---                    | ---                   | 1.83E-04             | -1.36  | -2.01  | -1.36  | 1.89       | ---                                                                              |
| MmuDNA.18254.1.S1_at   | ---                    | ---                   | 3.15E-05             | -1.36  | -1.86  | -1.47  | 2.15       | ---                                                                              |
| MmuDNA.7878.1.S1_at    | ---                    | ---                   | 4.99E-07             | -1.37  | -1.84  | -1.36  | 2.01       | ---                                                                              |
| MmuSTS.1380.1.S1_at    | ---                    | ---                   | 6.42E-06             | -1.37  | -1.65  | -1.22  | 2.72       | ---                                                                              |
| MmuDNA.924.1.S1_at     | ---                    | ---                   | 4.64E-03             | -1.40  | -2.23  | 1.35   | -1.29      | ---                                                                              |
| MmuDNA.24307.1.S1_s_at | LOC718333              | LOC718333             | 6.38E-05             | -1.41  | -1.18  | 1.15   | 2.83       | Similar to Protein C11orf51                                                      |
| MmuDNA.14323.1.S1_s_at | SIGLEC6                | SIGLEC6               | 9.65E-07             | -1.42  | -1.51  | -1.30  | 2.16       | sialic acid binding Ig-like lectin 6                                             |
| MmuDNA.9521.1.S1_at    | QPCT                   | QPCT                  | 1.54E-03             | -1.43  | 2.09   | -1.18  | 1.00       | glutaminyl-peptide cyclotransferase                                              |
| Mmu.16454.1.S2_at      | THY1                   | THY1                  | 7.92E-04             | -1.43  | 2.53   | 1.05   | -1.21      | Thy-1 cell surface antigen                                                       |
| MmuDNA.9989.1.S1_at    | ---                    | ---                   | 6.94E-07             | -1.43  | -1.19  | 1.02   | 2.98       | ---                                                                              |
| MmuDNA.8010.1.S1_at    | ---                    | ---                   | 6.66E-03             | -1.44  | -1.19  | -2.25  | -1.71      | ---                                                                              |
| MmuDNA.34165.1.S1_s_at | ---                    | ---                   | 4.08E-04             | -1.44  | 2.81   | 1.14   | -1.23      | ---                                                                              |
| MmuSTS.2780.1.S1_at    | SLC27A2                | SLC27A2               | 2.61E-04             | -1.44  | 2.48   | -1.07  | -1.03      | solute carrier family 27 (fatty acid transporter), member 2                      |
| MmuDNA.925.1.S1_at     | ---                    | ---                   | 1.97E-03             | -1.44  | -2.26  | 1.44   | -1.27      | ---                                                                              |
| MmuDNA.12754.1.S1_s_at | MS4A1                  | MS4A1                 | 2.22E-04             | -1.45  | -2.34  | -1.69  | 1.69       | membrane-spanning 4-domains, subfamily A, member 1                               |
| MmuDNA.18367.1.S1_at   | LOC708948              | LOC708948             | 5.63E-04             | -1.45  | -2.24  | -1.02  | 1.20       | hypothetical protein LOC708948                                                   |
| MmuDNA.43107.1.S1_at   | LOC718801              | LOC718801             | 3.04E-04             | -1.46  | -1.58  | -1.00  | 2.18       | similar to Fc receptor-like 3 precursor                                          |
| MmuDNA.580.1.S1_at     | ---                    | ---                   | 1.93E-03             | -1.47  | -2.78  | -1.44  | 2.75       | ---                                                                              |
| MmuDNA.11101.1.S1_at   | ---                    | ---                   | 1.21E-03             | -1.48  | -1.17  | -2.15  | -1.76      | ---                                                                              |
| MmuSTS.1308.1.S1_at    | ---                    | ---                   | 2.19E-04             | -1.48  | -2.33  | -1.32  | 2.88       | ---                                                                              |
| MmuDNA.5951.1.S1_at    | MS4A1                  | MS4A1                 | 2.57E-05             | -1.48  | -2.01  | -1.61  | 1.82       | membrane-spanning 4-domains, subfamily A, member 1                               |
| MmuDNA.27586.1.S1_at   | LOC701729              | LOC701729             | 2.22E-05             | -1.50  | 2.44   | 1.28   | 1.28       | hypothetical protein LOC701729                                                   |
| MmuDNA.18304.1.S1_at   | ---                    | ---                   | 5.57E-03             | -1.51  | 1.06   | -1.55  | -2.18      | ---                                                                              |
| MmuDNA.20850.1.S1_s_at | ---                    | ---                   | 2.95E-04             | -1.51  | 2.67   | 1.10   | -1.15      | ---                                                                              |
| MmuSTS.529.1.S1_at     | LOC698428              | LOC698428             | 3.33E-03             | -1.52  | 2.05   | -1.19  | -1.45      | Similar to ornithine carbamoyltransferase precursor                              |
| MmuDNA.32887.1.S1_at   | ANK3                   | ANK3                  | 6.52E-04             | -1.53  | -1.59  | -2.08  | 1.03       | ankyrin 3                                                                        |
| MmuDNA.23054.1.S1_at   | LOC708634              | LOC708634             | 3.06E-04             | -1.56  | 1.08   | -2.02  | -1.96      | similar to ion transporter protein                                               |
| MmuDNA.38219.1.S1_at   | LOC720578              | LOC720578             | 2.90E-06             | -1.57  | -2.06  | -1.30  | 1.43       | similar to HLA class II histocompatibility antigen, DQ(1) beta chain precursor ( |
| MmuSTS.1928.1.S1_at    | LOC712321              | LOC712321             | 4.86E-04             | -1.59  | 2.31   | 1.09   | -1.29      | similar to myeloblastosis proto-oncogene product isoform 2                       |
| MmuDNA.32279.1.S1_at   | ---                    | ---                   | 1.61E-07             | -1.59  | -2.18  | -1.40  | 1.52       | ---                                                                              |
| MmuDNA.4335.1.S1_at    | LOC706308              | LOC706308             | 3.21E-03             | -1.60  | -1.30  | -2.02  | -1.15      | similar to guanine nucleotide exchange factor p53                                |
| MmuDNA.10172.1.S1_at   | ---                    | ---                   | 6.99E-03             | -1.61  | -7.14  | -1.05  | -1.45      | ---                                                                              |
| MmuDNA.14306.1.S1_at   | CD1C                   | CD1C                  | 7.88E-06             | -1.62  | -2.22  | -1.39  | 1.64       | CD1C antigen, c polypeptide                                                      |
| MmuSTS.2065.1.S1_s_at  | PYGL                   | PYGL                  | 4.24E-05             | -1.63  | 2.58   | -1.23  | -1.14      | phosphorylase, glycogen, liver                                                   |
| MmuDNA.40214.1.S1_at   | LOC706847              | LOC706847             | 5.23E-03             | -1.64  | -4.42  | 2.00   | 1.04       | similar to acyl-CoA synthetase long-chain family member 6 isoform b              |
| MmuSTS.2810.1.S1_at    | ANK3                   | ANK3                  | 3.51E-04             | -1.71  | -1.57  | -2.02  | 1.12       | ankyrin 3                                                                        |
| MmuDNA.29333.1.S1_at   | LOC703555              | LOC703555             | 6.19E-06             | -1.71  | -2.12  | -1.69  | 1.83       | similar to oxysterol-binding protein-like protein 10                             |
| MmuDNA.38909.1.S1_at   | ---                    | ---                   | 5.23E-07             | -1.74  | -2.25  | -1.71  | 1.39       | ---                                                                              |
| MmuDNA.36201.1.S1_at   | CYP3A5                 | CYP3A5                | 2.63E-06             | -1.76  | 2.43   | -1.04  | 1.07       | cytochrome P450, family 3, subfamily A, polypeptide 5                            |
| MmuDNA.17530.1.S1_at   | LOC715937              | LOC715937             | 9.17E-04             | -1.77  | -2.11  | -1.65  | -1.03      | similar to sulfatase 2 isoform a precursor                                       |
| MmuDNA.40962.1.S1_at   | ---                    | ---                   | 6.31E-04             | -1.77  | -1.39  | -2.15  | -1.18      | ---                                                                              |
| MmuDNA.16085.1.S1_at   | ---                    | ---                   | 2.21E-03             | -1.82  | -2.20  | -1.35  | -1.01      | ---                                                                              |
| MmuSTS.4256.1.S1_at    | LOC705300              | LOC705300             | 1.90E-03             | -1.86  | 1.03   | -2.10  | -1.90      | similar to dynamin 3                                                             |
| MmuDNA.40060.1.S1_s_at | LOC694287              | LOC694287             | 6.46E-04             | -1.88  | -1.43  | -2.00  | -1.06      | similar to Fas apoptotic inhibitory molecule 3                                   |
| MmuDNA.19209.1.S1_s_at | LOC697208              | LOC697208             | 1.78E-04             | -1.97  | 3.54   | 1.76   | -3.78      | similar to Neutrophil gelatinase-associated lipocalin precursor (NGAL) (p25) (25 |
| MmuDNA.40456.1.S1_at   | PNOC                   | PNOC                  | 1.17E-04             | -1.97  | -2.01  | -1.37  | 1.37       | prepronociceptin                                                                 |
| MmuDNA.40387.1.S1_at   | ---                    | ---                   | 3.79E-05             | -2.00  | -1.37  | -1.50  | 1.31       | ---                                                                              |
| MmuDNA.36545.1.S1_at   | ---                    | ---                   | 6.46E-03             | -2.01  | 1.57   | -1.24  | -1.17      | ---                                                                              |
| MmuDNA.10151.1.S1_at   | ---                    | ---                   | 2.59E-04             | -2.01  | -1.60  | -1.34  | 1.05       | ---                                                                              |
| MmuDNA.22591.1.S1_at   | LOC712740              | LOC712740             | 4.40E-05             | -2.02  | -1.20  | -1.59  | 1.02       | similar to nuclear receptor co-repressor/HDAC3 complex subunit                   |
| MmuDNA.749.1.S1_at     | LOC705089              | LOC705089             | 1.06E-04             | -2.02  | -1.26  | -1.84  | -1.03      | similar to DRE1 protein                                                          |
| MmuDNA.38268.1.S1_at   | LOC714408              | LOC714408             | 1.48E-05             | -2.02  | -1.78  | -1.89  | 1.41       | similar to AF4/FMR2 family, member 3 isoform 2                                   |
| MmuDNA.28371.1.S1_at   | LOC696275              | LOC696275             | 7.19E-03             | -2.02  | 1.13   | 1.33   | 1.02       | similar to neuregulin 1 isoform HRG-beta1                                        |
| MmuDNA.12706.1.S1_at   | ---                    | ---                   | 1.31E-05             | -2.03  | -1.12  | -1.56  | -1.08      | ---                                                                              |
| MmuDNA.7504.1.S1_at    | LOC703597              | LOC703597             | 2.69E-05             | -2.04  | -1.17  | -1.64  | -1.11      | similar to Eukaryotic translation initiation factor 4B (eIF-4B)                  |
| MmuDNA.35245.1.S1_at   | ---                    | ---                   | 4.13E-04             | -2.05  | -1.14  | -1.46  | -1.33      | ---                                                                              |
| MmuDNA.1637.1.S1_at    | ---                    | ---                   | 2.49E-04             | -2.05  | 1.09   | -1.44  | -1.21      | ---                                                                              |
| MmuDNA.31642.1.S1_at   | ---                    | ---                   | 1.32E-03             | -2.05  | -1.69  | -2.00  | 1.03       | ---                                                                              |
| MmuDNA.17480.1.S1_at   | ---                    | ---                   | 3.86E-05             | -2.05  | 1.16   | -1.19  | -1.10      | ---                                                                              |
| MmuDNA.12398.1.S1_at   | LOC723437              | LOC723437             | 3.10E-07             | -2.05  | 1.05   | -1.23  | 1.31       | Similar to SH3 domain and tetratricopeptide repeats 1                            |



| Affymetrix Probeset ID  | Affymetrix Gene Symbol | Corrected Gene Symbol | ANOVA (time) p-value | D10/D0 | D14/D0 | D30/D0 | CHRONIC/DO | Gene Description                                                                 |
|-------------------------|------------------------|-----------------------|----------------------|--------|--------|--------|------------|----------------------------------------------------------------------------------|
| MmuSTS.1251.1.S1_at     | LOC707560              | LOC707560             | 2.28E-03             | -2.25  | 1.16   | -1.06  | -1.30      | similar to class-I MHC-restricted T cell associated molecule                     |
| MmuSTS.2592.1.S1_at     | ---                    | ---                   | 7.68E-06             | -2.20  | -1.12  | -1.47  | -1.02      | ---                                                                              |
| MmugDNA.24527.1.S1_at   | ---                    | ---                   | 1.97E-03             | -2.07  | -1.50  | -1.33  | -1.05      | ---                                                                              |
| MmugDNA.32882.1.S1_at   | LOC718964              | LOC718964             | 4.23E-04             | -2.07  | -1.85  | -1.97  | -1.20      | Hypothetical protein LOC718964                                                   |
| MmugDNA.20716.1.S1_at   | ---                    | ---                   | 2.35E-03             | -2.07  | -1.36  | -1.67  | -1.28      | ---                                                                              |
| MmugDNA.3847.1.S1_at    | LOC717025              | LOC717025             | 1.36E-03             | -2.08  | 1.33   | -1.74  | -1.57      | similar to TPR repeat-containing protein KIAA1043                                |
| MmugDNA.21074.1.S1_at   | LOC698536              | IRS2                  | 7.08E-04             | -2.09  | -1.35  | -1.30  | -1.29      | insulin receptor substrate 2                                                     |
| MmuSTS.535.1.S1_at      | ---                    | ---                   | 5.51E-03             | -2.09  | -1.29  | -1.90  | -1.30      | ---                                                                              |
| MmugDNA.1596.1.S1_at    | LOC713460              | LOC713460             | 2.40E-04             | -2.09  | -1.14  | -2.17  | -1.81      | similar to Profilin-2 (Profilin II)                                              |
| MmugDNA.21123.1.S1_at   | IGF1R                  | IGF1R                 | 5.06E-03             | -2.09  | -1.34  | -1.89  | -1.80      | insulin-like growth factor 1 receptor                                            |
| MmugDNA.40920.1.S1_at   | ---                    | ---                   | 1.73E-03             | -2.10  | -1.20  | -1.59  | -1.11      | ---                                                                              |
| MmugDNA.11294.1.S1_at   | LOC713134              | LOC713134             | 1.78E-06             | -2.10  | -1.00  | -1.58  | -1.14      | similar to eukaryotic translation initiation factor 2C, 4                        |
| MmugDNA.31091.1.S1_at   | LOC718266              | LOC718266             | 7.76E-05             | -2.11  | -1.05  | -1.67  | 1.13       | Similar to Interleukin-18-binding protein precursor (IL-18BP) (Interferon gamma- |
| MmugDNA.22445.1.S1_at   | ---                    | ---                   | 1.02E-05             | -2.11  | -1.28  | -1.89  | -1.08      | ---                                                                              |
| MmugDNA.24921.1.S1_at   | ---                    | ---                   | 5.15E-04             | -2.11  | -2.34  | -2.11  | 1.06       | ---                                                                              |
| MmuSTS.84.1.S1_at       | LOC717702              | LOC717702             | 1.26E-05             | -2.11  | -1.75  | -1.70  | 1.19       | similar to HLA class II histocompatibility antigen, DO beta chain precursor (MHC |
| MmugDNA.11989.1.S1_at   | LOC701721              | LOC701721             | 4.13E-04             | -2.12  | -2.01  | -1.74  | 1.25       | similar to X Kell blood group precursor-related, X-linked                        |
| MmugDNA.896.1.S1_at     | LOC701925              | LOC701925             | 7.23E-04             | -2.12  | -1.48  | -1.63  | -1.09      | similar to solute carrier family 4, sodium bicarbonate cotransporter, member 7   |
| MmugDNA.9983.1.S1_at    | ---                    | 11-Sep 40067          | 2.57E-03             | -2.12  | 1.02   | -1.34  | -1.08      | septin 11                                                                        |
| MmugDNA.13933.1.S1_at   | LOC694219              | LOC694219             | 4.50E-05             | -2.14  | -1.14  | -1.59  | 1.07       | similar to homeodomain-only protein                                              |
| MmugDNA.15353.1.S1_at   | LOC704513              | LOC704513             | 3.93E-04             | -2.16  | -1.36  | -2.39  | -1.02      | similar to ALEX3 protein                                                         |
| MmugDNA.28007.1.S1_at   | LOC696781              | LOC696781             | 2.57E-05             | -2.17  | -1.04  | -1.78  | -1.23      | hypothetical protein LOC696781                                                   |
| MmugDNA.42700.1.S1_at   | ---                    | ---                   | 1.79E-03             | -2.18  | -1.54  | -1.95  | -1.16      | ---                                                                              |
| MmugDNA.621.1.S1_at     | ---                    | RPL35                 | 6.74E-05             | -2.20  | -1.34  | -1.52  | -1.14      | ribosomal protein l35                                                            |
| MmugDNA.17094.1.S1_at   | ---                    | ---                   | 2.80E-07             | -2.20  | -2.18  | 1.16   | 1.62       | ---                                                                              |
| MmugDNA.7201.1.S1_at    | LOC712407              | LOC712407             | 2.22E-04             | -2.21  | -1.10  | -1.77  | -1.15      | similar to carboxypeptidase D precursor                                          |
| MmugDNA.34676.1.S1_at   | LOC689035              | LOC689035             | 3.58E-03             | -2.21  | 1.17   | -2.10  | -2.08      | Similar to chromosome 2 open reading frame 7                                     |
| MmugDNA.41434.1.S1_at   | LOC700747              | LOC700747             | 3.03E-04             | -2.21  | 1.07   | -1.58  | -1.27      | similar to gamma-glutamyl hydrolase precursor                                    |
| MmugDNA.42278.1.S1_s_at | ---                    | ---                   | 6.20E-03             | -2.21  | -1.17  | -1.15  | -1.15      | ---                                                                              |
| MmugDNA.8795.1.S1_at    | ---                    | ---                   | 4.69E-06             | -2.23  | -2.10  | -1.89  | 1.46       | ---                                                                              |
| MmugDNA.12780.1.S1_at   | BMX                    | BMX                   | 2.83E-05             | -2.24  | 1.96   | -1.27  | -1.24      | BMX non-receptor tyrosine kinase                                                 |
| MmugDNA.4445.1.S1_at    | LOC713134              | LOC713134             | 9.54E-06             | -2.25  | -1.22  | -1.63  | -1.13      | similar to eukaryotic translation initiation factor 2C, 4                        |
| MmugDNA.34681.1.S1_at   | LOC713011              | LOC713011             | 3.71E-03             | -2.26  | -1.68  | -1.97  | -1.32      | similar to sortilin-related receptor containing LDLR class A repeats preprope    |
| MmugDNA.37241.1.S1_at   | LOC704834              | LOC704834             | 6.13E-05             | -2.28  | -1.44  | -1.88  | -1.18      | hypothetical protein LOC704834                                                   |
| MmuSTS.4018.1.S1_at     | CXCR6                  | CXCR6                 | 8.87E-05             | -2.28  | 1.53   | -1.45  | -1.38      | chemokine (C-X-C motif) receptor 6                                               |
| MmugDNA.9129.1.S1_at    | LOC713051              | LOC713051             | 1.81E-03             | -2.30  | -1.09  | -1.71  | -1.37      | Similar to 60S ribosomal protein L21                                             |
| MmugDNA.39023.1.S1_at   | ---                    | ---                   | 4.11E-04             | -2.31  | 1.01   | -1.55  | -1.25      | ---                                                                              |
| MmugDNA.7501.1.S1_at    | ---                    | ---                   | 2.12E-03             | -2.32  | -1.66  | -1.64  | 1.06       | ---                                                                              |
| MmugDNA.7792.1.S1_at    | LOC712407              | LOC712407             | 1.30E-05             | -2.33  | -1.09  | -1.66  | -1.20      | similar to carboxypeptidase D precursor                                          |
| MmugDNA.10854.1.S1_at   | ---                    | ---                   | 1.50E-03             | -2.33  | -1.65  | -1.87  | -1.41      | ---                                                                              |
| MmuSTS.1606.1.S1_at     | LOC707343              | LOC707343             | 4.24E-04             | -2.34  | -1.50  | -1.79  | -1.18      | similar to kelch-like 14                                                         |
| MmugDNA.8916.1.S1_at    | ---                    | ---                   | 6.52E-08             | -2.36  | -1.16  | -1.61  | -1.06      | ---                                                                              |
| Mmu.5879.1.S1_at        | LOC701255              | LOC701255             | 2.51E-04             | -2.37  | -1.32  | -1.75  | -1.11      | similar to ribosomal protein L15                                                 |
| MmugDNA.7323.1.S1_at    | ---                    | ---                   | 1.96E-03             | -2.38  | -1.78  | -1.99  | -1.10      | ---                                                                              |
| MmugDNA.437.1.S1_at     | ---                    | ---                   | 1.61E-04             | -2.43  | -1.76  | -2.21  | -1.29      | ---                                                                              |
| MmugDNA.31648.1.S1_at   | LOC713894              | LOC713894             | 5.83E-03             | -2.45  | -1.66  | -1.51  | -1.16      | similar to CG8312-PA, isoform A                                                  |
| MmugDNA.8131.1.S1_at    | ---                    | ---                   | 5.95E-07             | -2.45  | -1.37  | -1.70  | -1.06      | ---                                                                              |
| MmugDNA.41979.1.S1_at   | LOC696649              | LOC696649             | 2.11E-04             | -2.48  | -1.83  | -1.92  | -1.31      | Similar to Proenkephalin A precursor                                             |
| MmugDNA.37748.1.S1_s_at | LOC722305              | LOC722305             | 2.25E-03             | -2.58  | 1.13   | 1.09   | 1.14       | similar to cDNA sequence BC048546                                                |
| MmugDNA.19071.1.S1_at   | ---                    | ---                   | 1.50E-03             | -2.57  | -1.73  | -1.92  | -1.29      | ---                                                                              |
| MmugDNA.31051.1.S1_at   | ---                    | ---                   | 7.36E-05             | -2.59  | -1.05  | -1.86  | -1.18      | ---                                                                              |
| MmugDNA.43512.1.S1_at   | ---                    | ---                   | 4.95E-05             | -2.60  | -1.06  | -1.27  | -1.11      | ---                                                                              |
| MmuSTS.1982.1.S1_at     | CD14                   | CD14                  | 3.24E-04             | -2.61  | 1.01   | -1.61  | -1.23      | CD14 molecule                                                                    |
| MmugDNA.7361.1.S1_at    | LOC717617              | LOC717617             | 2.72E-04             | -2.66  | 1.23   | -1.72  | -2.18      | similar to methionine sulfoxide reductase B3 isoform 2                           |
| MmuSTS.2215.1.S1_at     | LOC713994              | LOC713994             | 2.74E-04             | -2.69  | -1.74  | -2.12  | -1.05      | similar to carbohydrate (N-acetylglucosamine-6-O) sulfotransferase 2             |
| MmugDNA.9503.1.S1_at    | CLEC4E                 | CLEC4E                | 4.65E-03             | -2.72  | -1.35  | -2.02  | 1.03       | C-type lectin domain family 4, member E                                          |
| MmugDNA.34736.1.S1_at   | ---                    | ---                   | 1.07E-06             | -2.73  | 1.78   | -1.40  | -1.36      | ---                                                                              |
| MmugDNA.15103.1.S1_at   | ---                    | ---                   | 3.58E-03             | -2.74  | -2.41  | -2.58  | -1.41      | ---                                                                              |
| MmugDNA.37748.1.S1_at   | LOC722305              | LOC722305             | 1.52E-03             | -2.74  | 1.33   | 1.07   | 1.16       | similar to cDNA sequence BC048546                                                |
| MmuSTS.4328.1.S1_x_at   | SERPINE2               | SERPINE2              | 2.52E-03             | -2.80  | -1.89  | -2.74  | -1.25      | serpin peptidase inhibitor, clade E (nexin, plasminogen activator inhibitor type |
| MmugDNA.25139.1.S1_at   | LOC712407              | LOC712407             | 2.06E-05             | -2.85  | -1.25  | -1.82  | -1.19      | similar to carboxypeptidase D precursor                                          |
| MmugDNA.73.1.S1_s_at    | ---                    | ---                   | 3.32E-04             | -2.90  | -1.06  | -2.00  | -1.97      | ---                                                                              |
| MmugDNA.22390.1.S1_at   | SLC7A11                | SLC7A11               | 3.61E-04             | -2.93  | -1.15  | -1.82  | 1.07       | solute carrier family 7, (cationic amino acid transporter, y+ system) member 11  |
| MmuSTS.1883.1.S1_at     | LOC712407              | LOC712407             | 3.52E-06             | -2.93  | -1.34  | -1.77  | -1.26      | similar to carboxypeptidase D precursor                                          |
| MmugDNA.30433.1.S1_at   | LOC716009              | SHCBP1                | 1.25E-06             | -2.93  | 1.14   | -1.53  | -1.11      | shc sh2-domain binding protein 1                                                 |
| MmuAffx.23.8.S1_s_at    | SERPINE2               | SERPINE2              | 4.60E-03             | -2.93  | -2.06  | -2.68  | -1.25      | serpin peptidase inhibitor, clade E (nexin, plasminogen activator inhibitor type |
| MmugDNA.26793.1.S1_at   | ---                    | ---                   | 1.45E-06             | -3.01  | 1.68   | -1.36  | 1.26       | ---                                                                              |
| MmuSTS.4328.1.S1_at     | SERPINE2               | SERPINE2              | 7.93E-04             | -3.07  | -1.89  | -3.23  | -1.23      | serpin peptidase inhibitor, clade E (nexin, plasminogen activator inhibitor type |
| MmugDNA.28513.1.S1_at   | ---                    | ---                   | 6.49E-06             | -3.08  | 1.56   | -1.70  | -1.23      | ---                                                                              |
| Mmu.11820.13.S1_a_at    | SERPINE2               | SERPINE2              | 3.91E-04             | -3.09  | -2.32  | -2.71  | -1.15      | serpin peptidase inhibitor, clade E (nexin, plasminogen activator inhibitor type |
| MmugDNA.33453.1.S1_at   | ---                    | ---                   | 7.55E-06             | -3.18  | -1.86  | -2.13  | 1.04       | ---                                                                              |
| MmugDNA.42294.1.S1_at   | ---                    | ---                   | 2.19E-03             | -3.25  | 1.08   | -2.02  | -1.13      | ---                                                                              |
| MmugDNA.33472.1.S1_at   | LOC708658              | LOC708658             | 1.64E-04             | -3.28  | 1.95   | -1.65  | -1.38      | Similar to 60S ribosomal protein L7                                              |
| MmugDNA.18548.1.S1_at   | ---                    | ---                   | 1.33E-04             | -3.28  | -3.39  | -2.07  | -1.31      | ---                                                                              |
| MmugDNA.12660.1.S1_at   | ---                    | FAM101B               | 8.54E-06             | -3.37  | -1.39  | -2.00  | -1.70      | family with sequence similarity 101, member b                                    |
| MmuSTS.3721.1.S1_at     | ---                    | ---                   | 2.48E-04             | -4.35  | 1.14   | -2.15  | 1.11       | ---                                                                              |

**Supplemental Table S6.** 239 SIV-inducible probesets identified as differentially expressed between SMs and RMm defined by 2 way ANOVA. Gene symbols annotation is from Affymetrix Rhesus Genome Array and DAVID database. Ratios expressed in DX/D0 columns are the average gene expression (linear scale) between all animals in an infection relative to that group's pre-infection expression level (red >2, green <-2).

| Affymetrix Probeset ID  | Corrected Gene Symbol | ANOVA p-value (Species/Time) | ANOVA (time) p-value | SM-SIVsmm |       |        |        |        |         |                      |       | RM-SIVsmm |        |        |        |         |                      |        |        | RM-SIVmac239 |             |  |  |
|-------------------------|-----------------------|------------------------------|----------------------|-----------|-------|--------|--------|--------|---------|----------------------|-------|-----------|--------|--------|--------|---------|----------------------|--------|--------|--------------|-------------|--|--|
|                         |                       |                              |                      | D3/D0     | D7/D0 | D10/D0 | D14/D0 | D30/D0 | D180/D0 | ANOVA (time) p-value | D3/D0 | D7/D0     | D10/D0 | D14/D0 | D30/D0 | D180/D0 | ANOVA (time) p-value | D10/D0 | D14/D0 | D30/D0       | Chronic /D0 |  |  |
| MmugDNA.3270.1.S1_at    | YY1                   | 5.42E-03                     | 0.000315             | 1.21      | -1.46 | -2.20  | -1.26  | -1.02  | 1.08    | 8.31E-01             | 1.08  | -1.08     | -1.27  | 1.11   | -1.01  | -1.10   | 4.29E-05             | -1.72  | -1.40  | -1.11        | -1.02       |  |  |
| MmugDNA.32811.1.S1_at   | SLFN5                 | 2.77E-04                     | 0.00012              | 1.19      | 3.61  | 4.20   | 1.42   | 1.46   | -1.06   | 2.57E-03             | -1.17 | 2.37      | 2.36   | 2.03   | 1.86   | -1.23   | 3.77E-03             | 3.45   | 1.75   | 1.44         | 1.14        |  |  |
| MmugDNA.41044.1.S1_at   | NRN                   | 2.86E-17                     | 0.001077             | -1.06     | 1.74  | 2.42   | 1.47   | -1.17  | -1.38   | 7.51E-01             | -1.17 | 1.34      | 1.38   | 1.57   | 1.38   | -1.23   | 1.89E-05             | 1.58   | 2.11   | 1.10         | 1.01        |  |  |
| MmugSTS.733.1.S1_at     | AGRN                  | 7.99E-04                     | 0.000127             | 1.06      | 1.89  | 2.17   | 1.35   | 1.17   | 1.04    | 4.52E-03             | -1.03 | 1.22      | 1.37   | 1.01   | 1.01   | -1.02   | 8.08E-03             | 1.46   | 1.02   | 1.24         | 1.12        |  |  |
| MmugDNA.27093.1.S1_at   | AZM                   | 2.58E-10                     | 0.008363             | 1.13      | 1.81  | 2.04   | 1.21   | 1.27   | 1.10    | 1.12E-01             | 1.27  | 1.09      | -1.22  | -1.06  | 1.00   | -1.14   | 2.35E-02             | 1.29   | 1.90   | 1.25         | -1.07       |  |  |
| MmugDNA.7313.1.S1_at    | PAPD5                 | 4.40E-06                     | 5.66E-07             | 1.26      | 1.86  | 2.06   | 1.09   | 1.14   | 1.17    | 3.42E-01             | 1.09  | 1.26      | 1.43   | 1.18   | -1.02  | 1.03    | 2.08E-04             | 1.60   | 1.16   | -1.10        | 1.00        |  |  |
| MmugDNA.17376.1.S1_at   | S100A8                | 3.78E-03                     | 0.000413             | 1.33      | 1.17  | -1.28  | 1.81   | 1.13   | -2.26   | 7.89E-01             | -1.02 | -1.33     | -1.47  | 1.20   | 1.02   | -1.42   | 3.58E-05             | -1.20  | 3.41   | 1.42         | -1.01       |  |  |
| MmugDNA.38346.1.S1_at   | PSAT1                 | 1.27E-04                     | 0.000182             | 1.01      | -1.12 | -1.16  | 2.33   | 1.29   | 1.11    | 1.09E-02             | -1.07 | -1.04     | 1.25   | 1.73   | 1.30   | 1.02    | 8.84E-03             | 1.28   | 2.28   | 1.83         | 1.24        |  |  |
| MmugDNA.8521.1.S1_at    | GOT2                  | 3.08E-04                     | 2.31E-09             | 1.01      | 6.35  | 7.79   | 2.64   | 1.84   | -1.09   | 1.62E-03             | 1.05  | 3.38      | 4.57   | 2.68   | 3.11   | 1.49    | 1.49E-02             | 4.91   | 1.68   | 1.97         | 1.43        |  |  |
| MmugDNA.494.1.S1_at     | RAB8A                 | 6.06E-06                     | 0.002915             | 1.36      | 2.00  | 1.85   | 1.34   | 1.16   | 1.20    | 4.37E-01             | 1.05  | 1.53      | 1.35   | 1.35   | 1.37   | 1.03    | 8.07E-04             | 1.46   | 1.50   | 1.04         | 1.01        |  |  |
| MmugDNA.37307.1.S1_at   | LBA1                  | 3.09E-03                     | 8.27E-06             | 1.03      | 1.70  | 2.70   | -1.01  | 1.15   | 1.03    | 3.92E-01             | 1.28  | 2.15      | 2.37   | 1.71   | 1.99   | 1.51    | 4.44E-04             | 2.16   | 1.06   | 1.04         | 1.07        |  |  |
| MmugDNA.40394.1.S1_at   | LY6E                  | 4.12E-04                     | 6.11E-05             | 1.17      | 1.93  | 2.40   | 1.25   | 1.32   | 1.54    | 3.44E-02             | -1.26 | 1.41      | 2.12   | 1.53   | 1.33   | -1.16   | 2.17E-04             | 2.97   | 1.59   | 1.50         | 1.49        |  |  |
| MmugDNA.21136.1.S1_at   | LTP1                  | 4.80E-24                     | 0.039633             | -1.13     | -1.82 | -2.59  | -2.13  | -1.57  | -1.62   | 6.59E-01             | 1.34  | 1.04      | -1.17  | -1.04  | -1.09  | -1.03   | 8.98E-02             | 1.07   | 1.21   | -1.12        | -1.34       |  |  |
| MmugSTS.4171.1.S1_at    | MSRA                  | 1.29E-04                     | 5.93E-06             | 1.06      | 2.75  | 2.51   | 1.30   | 1.21   | -1.12   | 7.89E-02             | 1.10  | 2.38      | 1.81   | 1.37   | 1.89   | 1.41    | 1.67E-03             | 2.18   | 1.52   | 1.27         | -1.00       |  |  |
| MmugDNA.1659.1.S1_at    | RPL4                  | 9.07E-06                     | 0.000494             | 1.47      | 2.59  | 2.73   | 1.72   | 1.30   | 1.30    | 1.19E-01             | -1.03 | 1.64      | 1.71   | 1.73   | 1.13   | 1.08    | 2.96E-04             | 2.28   | 1.80   | 1.37         | 1.40        |  |  |
| MmugSTS.1580.1.S1_at    | IFIT5                 | 4.03E-06                     | 0.000114             | 1.10      | 3.41  | 2.51   | 1.59   | 1.39   | -1.00   | 5.30E-04             | 1.02  | 3.48      | 9.55   | 2.67   | 2.75   | 1.16    | 2.09E-03             | 7.77   | 2.17   | 2.77         | 1.81        |  |  |
| MmugDNA.2075.1.S1_at    | SMCHD1                | 1.07E-04                     | 3.08E-05             | 1.23      | 2.84  | 2.35   | 1.50   | 1.12   | -1.11   | 3.06E-01             | -1.04 | 1.79      | 2.20   | 1.85   | 1.73   | 1.43    | 1.27E-03             | 1.79   | -1.03  | -1.04        | 1.09        |  |  |
| MmugSTS.1185.1.S1_at    | PLA1A                 | 3.49E-03                     | 1.93E-07             | -1.11     | 1.32  | 2.01   | 1.05   | -1.15  | -1.03   | 2.70E-03             | -1.03 | -1.01     | 1.66   | -1.18  | -1.23  | -1.15   | 3.58E-05             | 2.78   | 1.39   | 1.30         | 1.11        |  |  |
| MmugDNA.21770.1.S1_at   | IRF7                  | 8.53E-13                     | 3.04E-08             | 1.06      | -1.12 | 2.64   | -1.19  | 1.10   | -1.06   | 7.27E-01             | -1.04 | 1.01      | -1.21  | 1.07   | 1.01   | 1.08    | 5.10E-05             | -1.88  | -1.06  | -1.18        | 1.09        |  |  |
| MmugDNA.4421.1.S1_at    | MAFB                  | 1.75E-04                     | 0.000479             | 1.20      | 2.97  | 3.39   | 1.81   | 1.50   | 1.16    | 5.33E-03             | -1.16 | 1.42      | 1.61   | 1.24   | -1.02  | -1.07   | 8.98E-03             | 2.52   | 1.71   | 1.83         | 1.08        |  |  |
| MmugDNA.28010.1.S1_at   | LGALS8                | 5.62E-05                     | 4.79E-05             | -1.02     | 2.17  | 1.76   | 1.06   | 1.03   | -1.11   | 4.39E-03             | 1.05  | 2.36      | 3.43   | 1.53   | 1.37   | -1.03   | 2.48E-03             | 3.35   | 1.28   | 1.68         | 1.15        |  |  |
| MmugDNA.12946.1.S1_at   | PML                   | 1.27E-06                     | 3.53E-08             | 1.02      | 2.22  | 2.97   | 1.36   | 1.25   | -1.02   | 3.29E-03             | -1.09 | 1.82      | 2.23   | 1.29   | 1.27   | 1.09    | 9.95E-04             | 3.14   | 1.49   | 1.55         | 1.45        |  |  |
| MmunerRS.936.1.S1_at    | GBP6                  | 2.02E-14                     | 9.87E-08             | 1.10      | 3.72  | 3.69   | 2.06   | 1.30   | -1.17   | 3.97E-01             | 1.04  | 2.98      | 3.01   | 1.93   | 2.55   | 1.54    | 3.98E-02             | 3.27   | 1.56   | 1.38         | 1.56        |  |  |
| MmugDNA.1519.1.S1_at    | KIAA1618              | 6.22E-06                     | 3.72E-07             | 1.19      | 1.79  | 2.20   | -1.02  | 1.30   | -1.03   | 3.51E-02             | -1.23 | 1.59      | 1.63   | 1.19   | 1.38   | -1.11   | 2.38E-01             | 1.99   | 1.13   | 1.21         | 1.52        |  |  |
| MmugDNA.4894.1.S1_at    | GSK3B                 | 3.18E-04                     | 0.000461             | 1.14      | -1.53 | -2.26  | -1.25  | -1.13  | -1.03   | 9.23E-01             | -1.01 | -1.01     | 1.16   | 1.18   | 1.03   | 1.16    | 1.15E-05             | -1.70  | -1.25  | -1.57        | -1.18       |  |  |
| MmugDNA.20819.1.S1_at   | OAS3                  | 1.78E-04                     | 3.30E-10             | 1.31      | 15.14 | 13.24  | 3.41   | 2.20   | 1.24    | 9.40E-05             | -1.17 | 7.47      | 6.40   | 3.50   | 5.01   | 1.22    | 1.07E-02             | 9.48   | 2.37   | 2.07         | 1.78        |  |  |
| MmugDNA.36516.1.S1_at   | IRF9                  | 4.90E-05                     | 4.15E-06             | 1.16      | 2.59  | 2.73   | 1.75   | 1.52   | 1.08    | 2.60E-01             | 1.12  | 1.65      | 1.46   | 1.40   | 1.49   | 1.19    | 1.45E-03             | 1.95   | 1.31   | 1.45         | 1.12        |  |  |
| MmugDNA.21074.1.S1_at   | IRS2                  | 9.90E-04                     | 0.000104             | 1.01      | -2.05 | -2.33  | -1.46  | -1.23  | -1.35   | 4.25E-02             | 1.06  | -1.04     | -1.30  | -1.07  | 1.25   | 1.41    | 7.08E-04             | 2.09   | -1.35  | -1.30        | -1.29       |  |  |
| MmugSTS.1283.1.S1_at    | DTL                   | 9.86E-03                     | 3.85E-06             | 1.23      | 1.50  | 1.25   | 3.05   | 1.57   | 1.11    | 7.78E-04             | -1.01 | 1.11      | 3.33   | 4.48   | 1.64   | 1.24    | 2.43E-03             | 3.91   | 8.52   | 2.61         | 1.86        |  |  |
| Mmu.11960.1.S1_x.at     | GBP1                  | 7.05E-12                     | 3.66E-05             | 1.05      | 2.68  | 4.08   | 1.33   | 1.05   | 1.06    | 5.99E-02             | 1.07  | 3.11      | 3.25   | 1.76   | 2.02   | -1.30   | 7.51E-03             | 5.55   | 1.62   | 2.14         | 1.88        |  |  |
| MmugDNA.41315.1.S1_at   | GBP1                  | 1.48E-14                     | 1.02E-09             | 1.54      | 10.93 | 10.11  | 5.81   | 2.10   | 1.25    | 1.56E-01             | -1.03 | 3.71      | 3.24   | 3.00   | 3.16   | 1.53    | 1.07E-01             | 4.34   | 1.66   | 2.27         | 2.07        |  |  |
| MmugDNA.29625.1.S1_at   | IRF7                  | 1.49E-03                     | 5.15E-09             | 1.14      | 5.10  | 6.04   | 2.41   | 1.84   | 1.07    | 8.85E-04             | 1.20  | 4.15      | 4.67   | 2.28   | 2.68   | 1.15    | 4.78E-03             | 6.96   | 2.34   | 2.55         | 1.71        |  |  |
| MmugDNA.28886.1.S1_at   | C6ORF150              | 7.30E-29                     | 0.000461             | -1.08     | 2.31  | 2.87   | 1.47   | 1.02   | -1.18   | 1.37E-02             | -1.13 | 2.11      | 2.37   | 1.47   | 1.74   | -1.01   | 1.41E-03             | 2.29   | 1.53   | 1.30         | 1.47        |  |  |
| MmugDNA.36196.1.S1_at   | STAT2                 | 1.03E-02                     | 1.01E-07             | 1.19      | 3.22  | 4.16   | 1.59   | 1.36   | 1.06    | 2.29E-06             | 1.07  | 2.38      | 2.52   | 1.82   | 1.73   | -1.02   | 4.17E-03             | 3.39   | 1.69   | 1.76         | 1.38        |  |  |
| MmugDNA.39346.1.S1_at   | SLC25A37              | 1.28E-03                     | 0.016074             | 1.05      | 1.81  | 2.11   | 1.02   | 1.00   | -1.61   | 5.36E-01             | -1.26 | 1.69      | 1.09   | 1.35   | 1.71   | 1.03    | 6.41E-01             | 1.45   | 1.35   | 1.36         | 1.09        |  |  |
| MmugSTS.1612.1.S1_at    | OASL                  | 5.20E-03                     | 1.87E-10             | 1.44      | 27.78 | 35.26  | 6.48   | 3.10   | 1.09    | 2.30E-02             | 1.37  | 9.23      | 10.48  | 4.27   | 5.30   | 1.74    | 5.36E-03             | 14.06  | 2.76   | 3.79         | 2.27        |  |  |
| MmugDNA.1519.1.S1_at    | SPTLC2                | 1.83E-04                     | 1.29E-05             | 1.17      | 1.95  | 2.41   | 1.29   | 1.18   | -1.07   | 6.28E-01             | -1.04 | -1.23     | 1.03   | -1.01  | -1.26  | -1.26   | 2.75E-02             | 1.60   | 1.39   | 1.08         | 1.11        |  |  |
| MmugDNA.685.1.S1_at     | ECGF1                 | 1.74E-14                     | 0.011705             | -1.04     | 2.23  | 2.66   | 1.60   | 1.48   | -1.09   | 2.24E-01             | -1.28 | 1.98      | 1.84   | 1.15   | 1.93   | 1.34    | 1.11E-01             | 2.10   | 1.49   | 1.28         | 1.29        |  |  |
| MmugDNA.29385.1.S1_at   | MIRN21                | 1.06E-04                     | 5.04E-05             | 1.28      | 2.01  | 2.47   | 2.04   | 1.32   | -1.32   | 4.07E-01             | -1.21 | 1.48      | 1.51   | 1.90   | 1.20   | 1.10    | 6.97E-03             | 1.66   | 2.13   | 1.34         | 1.05        |  |  |
| MmugDNA.29315.1.S1_at   | DEPDC1                | 6.40E-07                     | 5.18E-07             | -1.03     | -1.10 | -1.19  | 3.18   | 1.57   | -1.03   | 4.16E-04             | -1.21 | -1.09     | 1.06   | 2.23   | 1.42   | -1.04   | 4.97E-05             | 1.10   | 2.99   | 2.10         | 1.28        |  |  |
| MmugDNA.40745.1.S1_at   | MLK1                  | 1.46E-08                     | 3.01E-11             | 1.14      | 3.22  | 3.58   | 1.44   | 1.16   | -1.08   | 3.48E-01             | 1.22  | 1.46      | 1.78   | 1.20   | 1.31   | 1.37    | 5.82E-05             | 1.73   | 1.15   | -1.01        | 1.33        |  |  |
| MmugDNA.13458.1.S1_at   | NAP1L1                | 4.41E-13                     | 0.000113             | -1.09     | -1.52 | -2.50  | -1.13  | -1.49  | -1.49   | 2.90E-01             | -1.11 | -1.12     | 1.39   | 1.09   | 1.04   | -1.07   | 2.75E-02             | -1.32  | 1.08   | -1.48        | -1.10       |  |  |
| MmugDNA.16608.1.S1_at   | ELL2                  | 2.93E-07                     | 4.71E-05             | 1.36      | -1.43 | -2.03  | 1.46   | 1.06   | -1.04   | 7.19E-01             | 1.38  | 1.19      | 1.70   | 1.54   | 1.47   | 1.25    | 7.30E-04             | -1.52  | 1.07   | 1.11         | -1.01       |  |  |
| MmugDNA.12091.1.S1_at   | BCL2L7P1              | 8.54E-06                     | 1.61E-05             | 1.10      | 1.92  | 2.39   | 1.41   | 1.31   | 1.19    | 3.22E-02             | 1.17  | 1.27      | 1.15   | 1.19   | 1.35   | 1.01    | 1.87E-03             | 1.77   | 1.39   | 1.29         | 1.30        |  |  |
| MmugDNA.19523.1.S1_s.at | CD164                 | 8.64E-06                     | 3.83E-05             | 1.24      | 2.25  | 3.49   | 1.45   | 1.39   | -1.14   | 6.28E-01             | -1.21 | 1.54      | 1.28   | 1.30   | 1.53   | -1.13   | 2.75E-05             | 2.36   | 1.47   | 1.23         | 1.21        |  |  |
| MmugDNA.19588.1.S1_at   | TIFA                  | 6.06E-07                     | 1.16E-07             | 1.32      | 2.00  | 3.88   | 1.94   | -1.21  | -1.49   | 6.52E-02             | -1.22 | 1.41      | 1.82   | 3.21   | 2.47   | 1.22    | 8.96E-02             | 2.20   | 1.83   | 1.26         | 1.14        |  |  |
| MmugDNA.15480.1.S1_at   | ZC3HAV1               | 4.05E-15                     | 5.80E-06             | 1.13      | 2.08  | 2.28   | 1.19   | 1.07   | -1.05   | 5.18E-01             | 1.02  | 1.60      | 1.41   | 1.44   | 1.66   | 1.02    | 3.94E-04             | 1.80   | -1.04  | 1.29         | -1.09       |  |  |
| MmugDNA.38781.1.S1_at   | LOC989390             | 1.43E-09                     | 0.000298             |           |       |        |        |        |         |                      |       |           |        |        |        |         |                      |        |        |              |             |  |  |

| Affymetrix Probeset ID  | Corrected Gene Symbol | ANOVA p-value (Species/line) | ANOVA (time) p-value | SM-SIVsmm |       |        |        |        |         |                      | RM-SIVsmm |       |        |        |        |         |                      | RM-SIVmac239 |        |        |       | Chronic /DD |
|-------------------------|-----------------------|------------------------------|----------------------|-----------|-------|--------|--------|--------|---------|----------------------|-----------|-------|--------|--------|--------|---------|----------------------|--------------|--------|--------|-------|-------------|
|                         |                       |                              |                      | D3/DD     | D7/DD | D10/DD | D14/DD | D30/DD | D180/DD | ANOVA (time) p-value | D3/DD     | D7/DD | D10/DD | D14/DD | D30/DD | D180/DD | ANOVA (time) p-value | D10/DD       | D14/DD | D30/DD |       |             |
| MmugDNA.24620.1.S1_at   | ---                   | 1.98E-19                     | 0.001341             | 1.47      | 3.51  | 3.57   | 1.59   | 1.82   | -1.08   | 4.48E-01             | -1.13     | 1.39  | 2.04   | 1.90   | 1.22   | -1.23   | 1.32E-04             | 2.30         | 1.61   | 1.41   | -1.02 |             |
| MmugDNA.22837.1.S1_at   | WARS                  | 1.12E-08                     | 0.007483             | 1.49      | 2.36  | 2.66   | 1.61   | 1.19   | 1.42    | 5.41E-01             | 1.39      | 1.69  | 1.26   | 1.35   | 1.12   | 1.13    | 1.31E-01             | 1.60         | 1.29   | 1.15   | 1.12  |             |
| MmugDNA.34026.1.S1_at   | PLA2G4C               | 6.69E-08                     | 9.94E-05             | 1.02      | 2.09  | 3.68   | 1.14   | 1.12   | 1.07    | 1.85E-03             | 1.00      | 3.67  | 12.20  | 1.96   | 1.92   | 1.06    | 5.39E-06             | 13.70        | 1.79   | 2.22   | 1.95  |             |
| MmugDNA.31670.1.S1_at   | FAM70A                | 3.65E-04                     | 1.77E-08             | 1.14      | 13.45 | 7.26   | 2.73   | 1.39   | 1.30    | 6.49E-05             | 1.07      | 2.50  | 6.20   | 2.65   | 1.80   | -1.09   | 1.33E-03             | 11.29        | 3.42   | 2.65   | 1.48  |             |
| MmugDNA.23571.1.S1_at   | EPST11                | 1.07E-11                     | 2.95E-07             | 1.24      | 6.52  | 6.79   | 2.38   | 2.27   | 1.09    | 2.51E-02             | 1.27      | 4.78  | 5.03   | 2.98   | 3.59   | 1.64    | 4.83E-02             | 4.94         | 1.86   | 2.20   | 1.94  |             |
| MmugSTS.1927.1.S1_at    | MX2                   | 1.24E-02                     | 7.21E-08             | 1.32      | 9.07  | 7.55   | 3.62   | 2.16   | 1.21    | 1.40E-04             | 1.12      | 4.19  | 5.29   | 2.98   | 3.25   | 1.25    | 2.18E-02             | 5.79         | 2.19   | 2.62   | 1.89  |             |
| MmugDNA.11115.1.S1_s_at | LOC707033             | 1.14E-03                     | 6.19E-06             | 1.22      | 2.76  | 2.83   | 1.41   | 1.26   | 1.23    | 2.83E-03             | -1.23     | 1.70  | 1.41   | 1.10   | 1.17   | -1.21   | 1.55E-02             | 2.29         | 1.76   | 1.25   | 1.20  |             |
| MmugDNA.25587.1.S1_at   | PAK2B                 | 5.06E-03                     | 2.00E-05             | 1.28      | 2.82  | 1.90   | 1.75   | 1.06   | -1.00   | 2.01E-03             | -1.39     | 1.70  | 3.21   | 2.03   | 1.48   | -1.13   | 1.06E-05             | 3.54         | 1.50   | 1.58   | 1.35  |             |
| MmugDNA.2972.1.S1_at    | SP140                 | 1.30E-03                     | 0.000254             | 1.00      | 1.74  | 2.33   | -1.10  | 1.16   | 1.05    | 2.77E-01             | 1.04      | 1.51  | 1.73   | 1.15   | 1.14   | 1.09    | 4.74E-05             | 2.39         | -1.08  | 1.14   | 1.25  |             |
| MmugDNA.28902.1.S1_at   | GAB1                  | 5.22E-08                     | 1.88E-06             | 1.13      | 1.21  | -1.16  | 2.12   | 1.06   | -1.27   | 3.19E-01             | -1.06     | 1.25  | 1.71   | 1.50   | 1.29   | -1.09   | 2.81E-01             | -1.03        | -1.26  | 1.13   | -1.13 |             |
| MmugDNA.9235.1.S1_s_at  | ADAR                  | 6.34E-05                     | 1.56E-06             | 1.15      | 2.64  | 2.39   | 1.28   | 1.22   | -1.05   | 2.40E-01             | 1.29      | 2.15  | 1.76   | 1.63   | 1.88   | 1.59    | 5.99E-02             | 1.54         | 1.22   | 1.12   | 1.12  |             |
| MmugDNA.2427.1.S1_at    | TXNDC5                | 3.52E-04                     | 8.28E-05             | 1.03      | -1.20 | -1.08  | 3.01   | 1.63   | 1.16    | 3.05E-01             | 1.00      | 1.16  | 1.01   | 1.66   | 1.70   | 1.18    | 1.51E-02             | 1.09         | 2.10   | 2.15   | 1.20  |             |
| MmugDNA.15476.1.S1_at   | EPST11                | 1.35E-21                     | 2.94E-08             | 1.30      | 6.90  | 6.66   | 2.71   | 1.90   | 1.18    | 5.47E-03             | 1.23      | 5.93  | 5.63   | 3.90   | 4.69   | 1.44    | 9.04E-03             | 6.68         | 2.35   | 2.77   | 2.06  |             |
| MmugDNA.25916.1.S1_at   | PLSCR1                | 1.79E-08                     | 1.10E-06             | 1.52      | 4.32  | 2.98   | 1.98   | 1.30   | 1.36    | 1.64E-01             | -1.44     | 2.19  | 2.76   | 1.45   | 1.40   | 1.40    | 8.70E-02             | 4.31         | 2.91   | 2.01   | 1.67  |             |
| MmugDNA.23425.1.S1_at   | IL1RN                 | 1.11E-06                     | 3.26E-06             | 1.09      | 2.01  | 4.26   | -1.08  | -1.36  | 1.01    | 1.52E-03             | 1.33      | 4.52  | 6.57   | 1.74   | 2.12   | 1.95    | 2.20E-08             | 9.86         | 1.86   | 1.37   | 1.11  |             |
| MmugDNA.621.1.S1_at     | RPL35                 | 4.66E-04                     | 3.60E-05             | 1.35      | -1.60 | -2.05  | -1.41  | 1.07   | 1.07    | 6.24E-03             | 1.38      | 1.00  | -1.32  | -1.03  | 1.05   | 1.20    | 6.74E-05             | -2.30        | -1.34  | -1.52  | -1.14 |             |
| MmugDNA.10394.1.S1_at   | RNASL2                | 1.83E-13                     | 0.006118             | 1.49      | 2.03  | 1.45   | 1.30   | 1.28   | 1.02    | 2.62E-01             | 1.02      | 1.40  | 1.65   | 1.76   | 1.69   | 1.14    | 3.12E-02             | 1.43         | 1.19   | -1.06  | 1.16  |             |
| MmugSTS.1377.1.S1_at    | BCL2L14               | 2.31E-03                     | 9.65E-10             | 1.15      | 5.24  | 9.11   | 2.29   | 1.21   | 1.28    | 2.19E-04             | 1.05      | 1.27  | 3.10   | 1.53   | -1.05  | -1.12   | 6.80E-05             | 8.13         | 3.53   | 2.30   | 1.54  |             |
| MmugDNA.22222.1.S1_at   | NBN                   | 4.68E-18                     | 0.003032             | -1.13     | 1.77  | 2.49   | 1.40   | -1.09  | -1.35   | 8.93E-01             | -1.02     | 1.10  | 1.16   | 1.37   | 1.22   | -1.41   | 3.51E-05             | 1.56         | -3.25  | 1.19   | 1.03  |             |
| MmugDNA.41250.1.S1_at   | PAQR8                 | 9.40E-16                     | 0.000244             | 1.23      | 2.94  | 2.20   | 1.41   | 1.19   | 1.04    | 5.94E-02             | 1.00      | 1.32  | 1.44   | 1.14   | 1.00   | -1.13   | 2.47E-03             | 1.70         | 1.21   | 1.27   | 1.19  |             |
| MmugDNA.816.1.S1_s_at   | IGJ                   | 4.97E-10                     | 8.83E-06             | -1.20     | -1.51 | -1.47  | 4.07   | 1.72   | -1.23   | 3.12E-01             | -1.03     | 1.17  | 1.85   | 2.47   | 2.18   | -1.31   | 9.73E-02             | 1.49         | 2.08   | 2.90   | 1.46  |             |
| MmugDNA.12660.1.S1_at   | FAM101B               | 1.06E-18                     | 0.002111             | 1.16      | -1.67 | -2.58  | -1.45  | 1.05   | 1.13    | 1.06E-03             | 1.10      | 1.02  | 2.02   | -1.27  | 1.16   | 1.59    | 8.54E-06             | -3.97        | -1.39  | -2.00  | -1.70 |             |
| MmugDNA.30329.1.S1_at   | PABPC4                | 1.04E-03                     | 0.001448             | 1.28      | -1.63 | -2.37  | -1.25  | 1.10   | 1.18    | 9.57E-01             | -1.06     | 1.02  | -1.22  | -1.11  | -1.04  | 1.00    | 1.00E-02             | -1.91        | -1.07  | -1.40  | -1.06 |             |
| MmugDNA.8486.1.S1_at    | OAS2                  | 4.80E-04                     | 3.10E-09             | 1.34      | 16.72 | 11.01  | 3.32   | 1.84   | 1.26    | 1.26E-03             | 1.31      | 7.95  | 10.68  | 4.29   | 4.18   | 1.38    | 2.71E-03             | 11.10        | 2.17   | 3.33   | 2.01  |             |
| MmugDNA.43121.1.S1_at   | CLEC7A                | 2.01E-03                     | 0.001144             | 1.70      | 2.41  | 2.21   | 1.76   | 1.39   | 1.17    | 1.25E-02             | -1.31     | 1.51  | 1.54   | 1.92   | 1.34   | 1.02    | 3.05E-01             | 1.56         | 1.39   | 1.41   | 1.12  |             |
| MmugDNA.18794.1.S1_at   | CDC20                 | 1.96E-05                     | 3.23E-05             | -1.02     | 1.10  | 1.08   | 2.61   | 1.82   | 1.29    | 1.69E-04             | -1.01     | 1.03  | -1.43  | 2.59   | 1.71   | 1.04    | 3.77E-06             | 1.07         | 5.16   | 2.57   | 1.64  |             |
| Mmu.11960.1.S1_at       | GBP1                  | 1.47E-12                     | 0.00185              | 1.00      | 3.01  | 4.91   | 1.55   | 1.39   | 1.01    | 4.47E-02             | -1.10     | 3.23  | 4.05   | 1.68   | 2.05   | -1.31   | 6.62E-03             | 5.75         | 1.76   | 2.19   | 1.96  |             |
| MmugSTS.1789.1.S1_at    | SCO2                  | 2.26E-04                     | 6.75E-07             | 1.14      | 3.00  | 3.65   | 1.64   | 1.33   | -1.14   | 4.51E-02             | 1.04      | 1.60  | 1.85   | 1.66   | 1.26   | -1.19   | 2.29E-02             | 2.96         | 1.44   | 1.52   | 1.15  |             |
| MmugSTS.1081.1.S1_at    | POE8H                 | 1.30E-15                     | 2.60E-05             | -1.06     | -2.32 | -3.03  | -2.31  | -1.52  | -1.45   | 3.04E-02             | 1.01      | -1.17 | -1.62  | -1.70  | 1.00   | 1.21    | 1.05E-02             | -2.07        | -1.64  | -1.96  | -1.21 |             |
| MmugDNA.34302.1.S1_at   | GBP1                  | 1.04E-06                     | 0.000764             | 1.13      | 1.80  | 2.20   | 1.07   | 1.16   | 1.15    | 1.50E-02             | 1.08      | 2.04  | 3.14   | 1.34   | 1.85   | 1.09    | 1.12E-02             | 3.60         | 1.04   | 1.73   | 1.74  |             |
| MmugDNA.13992.1.S1_at   | SHROOM4               | 5.25E-06                     | 1.20E-05             | 1.06      | 4.19  | 5.29   | 1.99   | 1.24   | 1.00    | 9.36E-01             | 1.15      | 1.10  | 1.09   | 1.22   | 1.14   | 1.08    | 2.58E-04             | 1.79         | 1.82   | 1.73   | 1.06  |             |
| Mmu.2142.1.S1_at        | TRIM22                | 6.31E-12                     | 4.55E-05             | 1.36      | 3.52  | 3.02   | 1.44   | 1.31   | 1.09    | 3.25E-01             | 1.03      | 2.24  | 1.57   | 1.71   | 1.63   | 1.48    | 2.49E-03             | 1.64         | -1.05  | 1.05   | 1.12  |             |
| MmugDNA.36872.1.S1_at   | LYSM2                 | 6.65E-19                     | 0.0005               | 1.10      | 2.74  | 2.65   | 1.54   | 1.15   | 1.19    | 1.76E-01             | -1.37     | 1.13  | 1.57   | 1.31   | 1.19   | -1.30   | 3.54E-06             | 2.41         | 1.19   | 1.14   | 1.31  |             |
| MmugDNA.40942.1.S1_at   | SAMD4A                | 1.75E-03                     | 0.007158             | 1.15      | 2.38  | 2.24   | 1.42   | -1.27  | -1.01   | 3.93E-04             | -1.02     | 2.11  | 7.99   | 2.91   | 1.28   | -1.07   | 3.72E-05             | 5.93         | 2.49   | 1.82   | 1.37  |             |
| MmugDNA.30432.1.S1_at   | MSRA                  | 6.23E-03                     | 0.000505             | 1.01      | 1.82  | 2.43   | -1.02  | 1.14   | 1.11    | 5.57E-01             | 1.09      | 1.79  | 1.45   | 1.18   | 1.50   | 1.20    | 3.05E-03             | 1.94         | 1.43   | 1.01   | -1.16 |             |
| Mmu.13989.1.S1_at       | LOC719212             | 7.11E-06                     | 0.000232             | 1.24      | 1.86  | 2.34   | 1.44   | 1.32   | 1.11    | 7.51E-02             | 1.15      | 1.49  | 2.03   | 1.34   | 1.02   | -1.09   | 6.63E-06             | 2.81         | 1.76   | 1.42   | 1.32  |             |
| Mmu.1653.1.S1_at        | TMPPSS3               | 6.02E-11                     | 3.12E-05             | 1.28      | -1.06 | -1.24  | 2.15   | 1.56   | 1.16    | 5.63E-02             | -1.23     | 1.01  | 1.17   | 2.82   | 1.73   | -1.07   | 1.18E-05             | -1.01        | 2.33   | 1.79   | 1.32  |             |
| MmugDNA.27480.1.S1_s_at | LGALS8                | 2.72E-13                     | 6.46E-06             | 1.04      | 5.90  | 5.01   | 1.76   | 1.38   | -1.11   | 2.10E-03             | 1.06      | 2.95  | 3.64   | 2.02   | 2.07   | 1.15    | 3.64E-04             | 3.68         | 1.49   | 1.87   | 1.37  |             |
| MmugSTS.3275.1.S1_at    | RRM2                  | 5.15E-08                     | 8.50E-08             | -1.33     | -1.19 | 1.14   | 4.92   | 2.31   | 1.18    | 6.08E-06             | -1.06     | 1.11  | -1.10  | 4.12   | 2.12   | 1.32    | 7.87E-04             | 1.26         | 6.11   | 2.81   | 1.89  |             |
| MmugDNA.29993.1.S1_s_at | FCGR2B                | 1.86E-17                     | 1.84E-10             | 1.33      | 3.31  | 4.70   | 1.67   | 1.41   | 1.10    | 6.69E-01             | 1.01      | 1.64  | 1.31   | 1.34   | 1.69   | 1.39    | 1.78E-01             | 1.11         | -1.03  | -1.18  | 1.05  |             |
| MmugDNA.18432.1.S1_at   | INDO                  | 1.73E-39                     | 0.004659             | 1.19      | 3.31  | 3.20   | 2.06   | 1.41   | 1.40    | 3.09E-01             | 1.10      | 1.81  | 1.11   | 1.37   | 1.68   | 1.52    | 3.78E-02             | 1.62         | 1.83   | 1.09   | -1.01 |             |
| MmugSTS.1497.1.S1_at    | RSAD2                 | 6.42E-09                     | 5.34E-09             | 1.74      | 49.95 | 49.42  | 17.85  | 4.99   | 1.32    | 2.91E-03             | 1.52      | 11.20 | 21.29  | 10.33  | 14.10  | 1.57    | 4.32E-02             | 19.80        | 2.49   | 7.10   | 3.32  |             |
| MmugDNA.16854.1.S1_at   | GBP2                  | 4.32E-22                     | 2.47E-07             | 1.15      | 5.82  | 6.17   | 2.13   | 1.18   | 1.03    | 5.14E-01             | 1.17      | 1.13  | 1.15   | 1.05   | 1.26   | 1.02    | 4.17E-04             | 1.39         | 1.08   | 1.05   | -1.08 |             |
| MmugDNA.33437.1.S1_s_at | ZNF313                | 8.67E-06                     | 8.80E-08             | 1.06      | 2.19  | 2.32   | 1.08   | 1.11   | -1.16   | 3.72E-02             | 1.09      | 1.75  | 1.76   | 1.27   | 1.43   | 1.15    | 3.03E-06             | 2.00         | 1.17   | 1.02   | 1.11  |             |
| MmugDNA.2077.1.S1_at    | SMCHD1                | 6.04E-08                     | 0.000442             | 1.29      | 2.90  | 2.03   | 1.64   | 1.07   | -1.20   | 1.04E-02             | -1.23     | 1.82  | 2.47   | 2.00   | 1.98   | 1.69    | 8.09E-03             | 1.73         | 1.10   | 1.01   | 1.23  |             |
| MmugDNA.11097.1.S1_at   | SRGAP2                | 8.66E-04                     | 2.71E-06             | 1.09      | 2.04  | 1.91   | 1.01   | 1.16   | 1.20    | 1.54E-02             | 1.33      | 2.73  | 3.03   | 1.41   | 1.71   | 1.27    | 4.37E-04             | 2.81         | 1.15   | 1.30   | 1.61  |             |
| MmugDNA.32941.1.S1_at   | LOC10R75              | 1.30E-30                     | 0.004566             | 1.08      | 2.24  | 1.21   | 2.07   | -1.14  | -1.34   | 1.54E-02             | 1.30      | 1.11  | 1.19   | 2.44   | 1.62   | 1.01    | 1.82E-07             | 1.73         | 3.65   | 2.11   | 1.27  |             |
| MmugDNA.36739.1.S1_at   | CR1                   | 8.22E-11                     | 1.17E-05             | 1.12      | -1.87 | -2.82  | -1.41  | -1.25  | -1.10   | 9.74E-01             | 1.14      | 1.12  | -1.03  | 1.03   | 1.11   | 1.06    |                      |              |        |        |       |             |

| Affymetrix Probeset ID  | Corrected Gene Symbol | ANOVA p-value (Species/line) | ANOVA (time) p-value | SM-SIVsmm |       |        |        |        |         | RM-SIVsmm |       |        |        |        |         | RM-SIVmac239         |          |        |        | Chronic /D0 |       |
|-------------------------|-----------------------|------------------------------|----------------------|-----------|-------|--------|--------|--------|---------|-----------|-------|--------|--------|--------|---------|----------------------|----------|--------|--------|-------------|-------|
|                         |                       |                              |                      | D3/D0     | D7/D0 | D10/D0 | D14/D0 | D30/D0 | D180/D0 | D3/D0     | D7/D0 | D10/D0 | D14/D0 | D30/D0 | D180/D0 | ANOVA (time) p-value | D10/D0   | D14/D0 | D30/D0 |             |       |
| MmugDNA.2222.1.S1_s_at  | NBN                   | 2.18E-11                     | 0.016709             | -1.07     | 1.57  | 2.11   | 1.32   | 1.00   | -1.41   | 7.41E-01  | -1.24 | 1.12   | 1.23   | 1.30   | 1.29    | -1.96                | 4.83E-06 | 1.89   | -2.21  | 1.35        | -1.00 |
| MmugDNA.30433.1.S1_at   | SHCBP1                | 1.43E-18                     | 2.35E-07             | 1.00      | -1.14 | -1.05  | 5.10   | 1.82   | 1.08    | 4.52E-01  | 1.06  | 1.65   | -1.18  | -1.16  | 1.79    | 1.99                 | 1.25E-05 | -2.93  | 1.14   | -1.53       | -1.11 |
| MmugDNA.39863.1.S1_at   | C18ORF24              | 8.89E-03                     | 0.007285             | 1.19      | 1.19  | 1.06   | 2.55   | 1.71   | 1.27    | 6.28E-03  | -1.05 | -1.19  | 1.04   | 2.21   | 1.36    | -1.35                | 8.74E-03 | 1.27   | 3.73   | 2.45        | 1.75  |
| Mmu.12833.1.S1_at       | PARP14                | 2.41E-10                     | 6.11E-08             | 1.38      | 5.85  | 5.36   | 2.52   | 1.56   | 1.04    | 1.25E-02  | 1.28  | 3.51   | 3.14   | 2.11   | 2.22    | 1.10                 | 7.08E-03 | 3.37   | 1.23   | 1.56        | 1.60  |
| MmugDNA.14075.1.S1_at   | BUB1B                 | 1.83E-03                     | 3.01E-06             | 1.09      | -1.00 | -1.28  | 2.28   | 1.66   | 1.30    | 5.91E-03  | 1.04  | -1.03  | 1.06   | 2.54   | 1.63    | 1.29                 | 7.32E-04 | -1.10  | 3.58   | 1.94        | 1.81  |
| MmugDNA.1989.1.S1_at    | MCM4                  | 6.87E-05                     | 0.011605             | -1.03     | -1.04 | -1.24  | 2.01   | 1.44   | 1.00    | 1.22E-05  | 1.11  | -1.07  | 1.06   | 2.84   | 1.36    | 1.15                 | 7.37E-05 | 1.07   | 4.04   | 1.32        | 1.40  |
| MmugDNA.28698.1.S1_at   | SAMD9                 | 1.15E-02                     | 0.00162              | 1.19      | 2.26  | 2.31   | 1.73   | 1.12   | -1.16   | 4.57E-02  | -1.16 | 2.34   | 3.55   | 3.25   | 3.15    | 1.21                 | 4.54E-03 | 3.29   | 1.52   | 1.80        | 1.32  |
| MmugDNA.6512.1.S1_at    | LOC26010              | 2.06E-08                     | 9.66E-07             | 1.29      | 9.40  | 13.36  | 3.44   | 1.56   | 1.56    | 6.80E-03  | -1.11 | 1.80   | 3.50   | 2.12   | 1.17    | -1.10                | 2.36E-06 | 9.07   | 4.00   | 9.31        | 1.36  |
| MmugDNA.32458.1.S1_at   | NAGK                  | 1.70E-14                     | 0.000245             | 1.32      | 1.81  | 2.01   | 1.26   | 1.20   | 1.07    | 2.68E-02  | 1.13  | 2.08   | 1.93   | 1.39   | 1.54    | 1.25                 | 4.57E-04 | 1.78   | 1.11   | 1.07        | 1.18  |
| MmugDNA.28553.1.S1_at   | PIK3AP1               | 7.02E-04                     | 7.19E-06             | 1.02      | 2.28  | 2.40   | -1.08  | -1.01  | -1.03   | 3.86E-01  | -1.07 | 1.41   | 1.16   | -1.10  | 1.13    | 1.01                 | 1.92E-05 | 1.83   | 1.19   | 1.01        | 1.25  |
| Mmu.10088.2.S1_at       | MX2                   | 1.22E-03                     | 6.48E-07             | 1.32      | 11.46 | 9.28   | 2.83   | 2.16   | 1.24    | 5.73E-04  | 1.11  | 4.95   | 5.95   | 2.38   | 3.28    | 1.20                 | 7.36E-03 | 7.94   | 1.98   | 2.98        | 2.18  |
| MmugDNA.24210.1.S1_at   | ATF6                  | 1.01E-18                     | 1.84E-05             | 1.22      | 2.61  | 2.58   | 1.30   | 1.16   | -1.27   | 6.21E-01  | 1.02  | 1.44   | 1.17   | 1.25   | 1.40    | 1.46                 | 1.52E-01 | 1.10   | 1.01   | -1.18       | -1.02 |
| MmugDNA.22912.1.S1_s_at | GBP1                  | 2.67E-18                     | 4.24E-08             | 1.78      | 14.10 | 14.41  | 5.18   | 2.32   | 1.10    | 2.95E-01  | 1.06  | 4.51   | 2.96   | 2.63   | 3.61    | 1.31                 | 1.22E-01 | 4.80   | 2.07   | 2.19        | 2.10  |
| MmuSTS.1188.1.S1_at     | PLSCR1                | 5.81E-12                     | 1.30E-05             | 1.40      | 3.97  | 2.74   | 1.96   | 1.39   | 1.41    | 8.99E-02  | -1.35 | 2.97   | 3.30   | 2.00   | 1.59    | 1.54                 | 8.57E-02 | 4.71   | 2.95   | 2.04        | 1.76  |
| Mmu.13018.2.S1_a_at     | TRIM5                 | 1.16E-04                     | 3.36E-07             | -1.04     | 2.65  | 4.98   | 1.25   | 1.25   | -1.30   | 1.15E-01  | 1.12  | 2.36   | 1.85   | 1.65   | 2.15    | 1.18                 | 1.79E-04 | 3.10   | 1.18   | 1.31        | 1.31  |
| MmugDNA.27936.1.S1_s_at | CFLAR                 | 6.22E-05                     | 0.000139             | -1.01     | 1.31  | 2.01   | -1.04  | 1.04   | -1.03   | 5.14E-01  | -1.01 | 1.39   | 1.40   | 1.09   | 1.47    | 1.06                 | 2.00E-02 | 1.77   | 1.42   | 1.20        | 1.08  |
| MmugDNA.9296.1.S1_at    | ECGF1                 | 7.12E-11                     | 0.000237             | 1.41      | 3.79  | 3.51   | 1.81   | 1.85   | 1.23    | 2.82E-03  | 1.14  | 2.18   | 1.99   | 1.96   | 1.45    | -1.11                | 1.01E-02 | 3.16   | 2.45   | 2.11        | 1.36  |
| MmugDNA.1987.1.S1_at    | SLC2A5                | 5.68E-06                     | 0.000246             | 1.13      | 1.89  | 2.36   | 1.71   | 1.22   | 1.09    | 1.84E-01  | 1.09  | -1.00  | -1.11  | 1.20   | 1.06    | -1.10                | 8.61E-04 | 1.92   | 3.22   | 1.78        | 1.11  |
| MmuSTS.4033.1.S1_at     | TLR5                  | 1.78E-09                     | 0.00013              | 1.02      | 1.29  | 2.01   | 1.02   | -1.11  | -1.75   | 4.82E-01  | -1.09 | 1.36   | -1.10  | 1.06   | 1.23    | 1.20                 | 1.05E-01 | 1.17   | 1.61   | 1.11        | -1.05 |
| MmugDNA.18451.1.S1_at   | PRDX4                 | 3.88E-18                     | 0.000322             | 1.25      | -1.09 | -1.07  | 2.59   | 1.47   | 1.17    | 6.61E-01  | -1.27 | -1.30  | 1.01   | 1.14   | -1.02   | -1.41                | 1.34E-02 | -1.09  | 1.44   | 1.30        | 1.27  |
| Mmu.15443.1.S1_x_at     | IGKV1-5               | 4.73E-08                     | 0.040368             | -1.31     | 1.02  | -1.07  | 2.99   | 1.80   | -1.17   | 2.63E-01  | 1.07  | 1.51   | -1.21  | 1.41   | 1.92    | 1.15                 | 3.29E-02 | -1.07  | 1.74   | 1.60        | 2.03  |
| MmugDNA.4666.1.S1_at    | TNFSF10               | 2.15E-11                     | 7.77E-07             | 1.17      | 4.21  | 3.92   | 1.50   | -1.01  | 1.36    | 4.06E-01  | -1.07 | 1.60   | 1.34   | 1.60   | 1.29    | 1.02                 | 1.38E-05 | 2.55   | 1.28   | 1.06        | -1.25 |
| MmuSTS.2397.1.S1_s_at   | GBP2                  | 1.65E-03                     | 2.63E-08             | 1.22      | 8.23  | 11.05  | 2.51   | 1.78   | 1.10    | 1.93E-01  | 1.22  | 2.59   | 3.22   | 1.62   | 2.29    | 1.45                 | 6.32E-03 | 4.81   | 2.06   | 1.78        | 1.66  |
| MmugDNA.2176.1.S1_at    | ISG20                 | 8.61E-06                     | 8.12E-07             | 1.10      | 3.06  | 3.55   | 1.83   | 1.40   | 1.07    | 4.01E-02  | -1.18 | 2.03   | 2.75   | 1.63   | 1.65    | -1.05                | 1.70E-06 | 1.17   | 1.73   | 1.51        | 1.50  |
| MmugDNA.13932.1.S1_at   | RNF213                | 9.26E-08                     | 1.54E-08             | 1.02      | 3.98  | 4.29   | 1.49   | 1.37   | -1.11   | 9.91E-02  | -1.00 | 1.56   | 1.55   | 1.27   | 1.34    | 1.03                 | 1.13E-02 | 2.27   | 1.48   | 1.45        | 1.22  |
| MmugDNA.22615.1.S1_s_at | ANKMY2                | 5.19E-03                     | 7.30E-08             | 1.08      | 2.08  | 2.40   | -1.01  | 1.11   | -1.05   | 1.41E-01  | 1.13  | 2.08   | 1.97   | 1.37   | 1.59    | 1.05                 | 1.84E-04 | 2.38   | 1.01   | 1.18        | 1.19  |
| MmugDNA.27612.1.S1_at   | ANKMY2                | 2.41E-07                     | 1.33E-05             | 1.17      | 2.14  | 1.69   | 1.52   | 1.05   | -1.08   | 3.65E-01  | -1.12 | 1.30   | 1.29   | 1.63   | 1.39    | 1.15                 | 1.03E-02 | 1.99   | 1.28   | 1.02        | 1.14  |
| MmugDNA.5879.1.S1_at    | TNFRSF17              | 1.22E-02                     | 3.09E-05             | -1.20     | -1.25 | -1.48  | 3.81   | 1.76   | -1.07   | 2.31E-01  | 1.04  | 1.02   | 1.38   | 1.72   | 1.95    | -1.13                | 4.65E-02 | 1.04   | 2.02   | 2.41        | 1.42  |
| MmugDNA.12648.1.S1_at   | TRIM22                | 2.51E-19                     | 1.39E-07             | 1.31      | 2.83  | 2.10   | 1.59   | 1.31   | 1.10    | 2.73E-01  | 1.02  | 1.88   | 1.75   | 1.74   | 1.74    | 1.48                 | 4.55E-02 | 1.95   | 1.05   | 1.06        | 1.15  |
| MmuSTS.1849.1.S1_at     | DTX1                  | 2.02E-05                     | 2.41E-05             | -1.00     | 1.79  | 2.33   | 2.93   | 1.37   | 1.20    | 2.36E-01  | -1.11 | 1.09   | 1.41   | 1.67   | 1.46    | -1.02                | 1.70E-01 | 2.23   | 2.18   | 1.83        | 1.44  |
| MmugDNA.32729.1.S1_at   | MKI67                 | 8.08E-09                     | 0.002639             | 1.38      | 1.25  | -1.19  | 2.21   | 1.76   | 1.33    | 1.23E-04  | 1.14  | 1.01   | -1.13  | 2.78   | 1.52    | 1.23                 | 4.84E-06 | -1.07  | 4.03   | 2.40        | 1.69  |
| MmuSTS.4665.1.S1_s_at   | FAS                   | 6.75E-03                     | 0.005132             | 1.34      | 2.19  | 1.51   | 1.60   | 1.11   | 1.07    | 6.05E-02  | -1.30 | 1.53   | 1.96   | 1.67   | 1.86    | 1.21                 | 1.21E-03 | 1.94   | 1.31   | 1.05        | 1.80  |
| MmugDNA.25674.1.S1_at   | KCTD14                | 5.05E-03                     | 5.11E-09             | 1.22      | 5.12  | 10.29  | 2.53   | 1.40   | 1.34    | 2.66E-04  | 1.07  | 1.28   | 2.79   | 1.84   | -1.13   | -1.04                | 1.60E-04 | 6.83   | 5.45   | 2.70        | 1.20  |
| MmugDNA.23497.1.S1_at   | STAT1                 | 5.54E-04                     | 1.19E-06             | 1.39      | 3.48  | 4.02   | 2.95   | 1.64   | 1.20    | 9.64E-02  | 1.30  | 2.98   | 2.50   | 2.08   | 1.76    | 1.33                 | 4.52E-02 | 2.84   | 1.65   | 1.58        | 1.41  |
| MmugDNA.3158.1.S1_at    | CCL8                  | 2.12E-08                     | 5.07E-06             | -1.10     | 1.99  | 3.35   | 1.28   | -1.10  | -1.01   | 2.77E-05  | 1.06  | 1.19   | 2.17   | 1.00   | 1.07    | 1.05                 | 2.36E-07 | 3.75   | 1.32   | 1.28        | 1.02  |
| MmugDNA.13466.1.S1_at   | ATF6                  | 1.03E-15                     | 0.000387             | 1.04      | 1.85  | 2.34   | 1.18   | 1.04   | -1.24   | 3.26E-01  | 1.01  | 1.36   | 1.14   | 1.20   | 1.22    | 1.17                 | 2.58E-03 | 1.53   | 1.12   | 1.09        | 1.05  |
| MmugDNA.228.1.S1_at     | C6ORF192              | 1.80E-04                     | 4.70E-05             | 1.31      | 2.41  | 1.91   | 1.65   | -1.00  | -1.02   | 5.02E-02  | -1.01 | 1.50   | 1.67   | 1.49   | 1.44    | -1.06                | 5.23E-03 | 2.01   | 1.40   | 1.45        | 1.10  |
| MmugDNA.12892.1.S1_at   | IFI44                 | 4.17E-05                     | 1.93E-08             | 1.82      | 45.84 | 24.30  | 18.22  | 5.86   | 1.43    | 1.23E-02  | 1.27  | 11.45  | 14.61  | 13.25  | 11.49   | 2.22                 | 2.97E-01 | 11.93  | 5.27   | 6.18        | 4.00  |
| MmuSTS.1778.1.S1_at     | SCIN                  | 1.80E-04                     | 1.70E-08             | 1.19      | 3.30  | 6.94   | 1.40   | 1.20   | -1.12   | 4.20E-01  | -1.02 | 1.21   | 1.05   | -1.01  | 1.12    | 1.04                 | 7.29E-03 | 4.02   | 4.29   | 1.67        | 1.04  |
| MmugDNA.20995.1.S1_at   | CCR1                  | 5.65E-05                     | 3.99E-05             | 1.14      | 2.36  | 2.29   | 1.32   | -1.08  | -1.31   | 3.55E-02  | -1.01 | 2.41   | 1.85   | 1.95   | 1.72    | 1.47                 | 6.61E-03 | 2.05   | 1.49   | 1.26        | -1.09 |
| MmugDNA.27315.1.S1_at   | SAMD9                 | 5.76E-04                     | 1.88E-06             | 1.15      | 2.40  | 2.25   | 1.96   | 1.37   | -1.33   | 1.17E-02  | -1.04 | 2.52   | 4.17   | 2.95   | 3.08    | 1.40                 | 4.65E-03 | 3.76   | 1.73   | 1.83        | 1.52  |
| MmugDNA.21968.1.S1_at   | LOC707687             | 6.57E-05                     | 0.000235             | 1.12      | 2.10  | 2.22   | 1.55   | 1.33   | 1.03    | 9.43E-02  | -1.22 | 1.32   | 1.55   | 1.17   | 1.19    | -1.25                | 2.55E-03 | 2.95   | 1.49   | 1.34        | 1.18  |
| MmugDNA.5683.1.S1_at    | PLS3                  | 1.17E-10                     | 6.47E-06             | 1.26      | -1.07 | -1.06  | 3.99   | -1.19  | -1.18   | 9.56E-03  | -1.12 | -1.02  | 1.07   | 1.25   | 1.01    | 1.08                 | 7.93E-05 | -1.03  | -2.14  | 1.29        | 1.11  |
| MmugDNA.42778.1.S1_at   | PARP12                | 6.01E-03                     | 2.84E-12             | 1.20      | 3.74  | 3.14   | 1.59   | 1.32   | 1.12    | 4.78E-04  | 1.08  | 2.85   | 3.35   | 2.69   | 1.86    | 1.41                 | 1.27E-04 | 3.12   | 1.47   | 1.39        | 1.22  |
| MmugDNA.22862.1.S1_at   | PAQR8                 | 2.50E-15                     | 4.54E-07             | 1.03      | 2.05  | 1.55   | 1.07   | 1.02   | 1.04    | 4.17E-01  | -1.04 | 1.01   | 1.06   | -1.03  | -1.09   | -1.24                | 7.59E-03 | 1.28   | -1.07  | 1.02        | 1.06  |
| MmugDNA.13395.1.S1_at   | IFI16                 | 5.43E-10                     | 0.00054              | -1.32     | 2.75  | 3.33   | 1.75   | 1.44   | -1.83   | 2.02E-01  | -1.96 | 1.74   | 1.96   | 1.57   | 2.08    | -1.65                | 2.30E-04 | 3.65   | 1.61   | 1.55        | 1.24  |
| MmugDNA.15107.1.S1_at   | ARG2                  | 5.59E-03                     | 0.002223             | 1.32      | 1.93  | 2.17   | 1.23   | 1.12   | -1.57   | 2.76E-01  | -1.02 | 1.24   | -1.13  | 1.37   | 1.74    | 1.31                 | 9.34E-02 | 1.27   | 1.77   | -1.02       | -1.03 |
| MmugDNA.23281.1.S1_at   | PELO                  | 2.50E-03                     | 0.002535             | -1.10     | -2.39 | -2.72  | -1.62  | -1.70  | -1.39   | 9.32E-01  | -1.17 | -1.08  | 1.01   | 1.14   | -1.29   | -1.16                | 1.17E-02 | 2.40   | -1.26  | -2.36       | -2.19 |
| MmugDNA.6326.1.S1_at    | SLFN5                 | 1.72E-10                     | 0.00041              | -1.07     | 2.80  | 2.77   | 1.93   | 1.49   | -1.61   | 2.17E-01  | -1.53 | 1.63   | 1.96   | 1.39   | 1.07    | -1.03                | 9.70E-05 | 2.40   | 1.78   | 1.25        | 1.08  |
| MmugDNA.10888.1.S1_at   | ---                   | 1.78E-03                     | 0.00189              | 1.10      | 2.16  | 2.17   | 1.25   | 1.09   | 1.03    | 9.51E-01  | 1.04  | 1.07   | 1.03   | 1.05   | -1.06   | 1.07                 | 2.91E-02 | 1.18   | 1.00   | 1.32        | -1.10 |
| MmugDNA.22157.1.S1_at   | PCGF5                 | 4.12E-07                     | 0.000394             | -1.03     | 1.84  | 2.05   | 1.02   | 1.10   | -1.11   | 4.26E-02  | 1.19  | 1.57   | 1.57   | 1.44   | 1.29    | -1.10                | 9.87E-07 | 2.17   | 1.20   | 1.35        | 1.12  |
| MmugDNA.24653.1.S1_at   | HMMR                  | 3.35E-03                     | 4.11E-06             | -1.07     | -1.07 | 1.17   | 2.63   | 1.28   | -1.05   | 1.84E-01  | -1.12 | -1.14  | 1.11   | 1.37   | 1.05    | -1.00                | 3.17E-01 | 1.17   | 1.48   | 1.29        | 1.22  |
| Mmu.10941.2.S1_at       | LOC712466             | 6.73E-09                     | 0.016853             | 1.54      | 2.15  | 1.86   | 1.47   | 1.13   | 1.07    | 6.06E-01  | 1.25  | 1.70   | 1.19   | 1.29   | 1.13    | 1.08                 | 1.17     | 1.43E- |        |             |       |

**Supplemental Table S7. Gene expression fold-changes in LNs at day 14 post-infection in SIVmm-infected SMs and SIVmac239-infected RMs.**

Fold changes at 14 dpi in SMs and RMs arranged by functional categories. Red indicates significantly increased expression, green significantly decreased expression, and black, not significantly altered in expression from base line by the criteria of  $\geq 2$ -fold change or Wilcoxon signed-rank test,  $P < 0.05$ .

| Classification                       | Sub-Classification    | SM Fold Changes 14dpi | RM Fold Changes 14dpi | Gene Symbol                  | Gene Title                    | Affymetrix ID           |
|--------------------------------------|-----------------------|-----------------------|-----------------------|------------------------------|-------------------------------|-------------------------|
| Apoptosis                            | Anti-Apoptosis        | 2.5                   | 2.1                   | BIRC5 (SURVIVIN)             | Baculoviral IAP repeat-cont   | MmuSTS.1955.1.S1_at     |
| Apoptosis                            | Anti-Apoptosis        | 4.2                   | 4.8                   | IFI-6-16                     | putative 6-16 protein         | MmuSTS.4428.1.S1_at     |
| Apoptosis                            | Anti-Apoptosis        | 3.6                   | 4.1                   | PTTG1                        | Securin (Pituitary tumor-tran | MmugDNA.31059.1.S1_s_at |
| Apoptosis                            | Anti-Apoptosis        | 3.0                   | 3.2                   | PTTG1                        | Securin (Pituitary tumor-tran | MmugDNA.31059.1.S1_at   |
| Apoptosis                            | Anti-Apoptosis        | 2.3                   | 3.3                   | XAF1                         | XIAP associated factor-1 iso  | MmugDNA.33861.1.S1_at   |
| Apoptosis                            | Anti-Apoptosis        | 1.3                   | 2.1                   | XAF1                         | XIAP associated factor-1 iso  | MmugDNA.32616.1.S1_at   |
| Apoptosis                            | Anti-Apoptosis        | 1.1                   | 2.4                   | CD5L                         | AIM (CD5L)                    | MmugDNA.36369.1.S1_at   |
| Apoptosis                            | Anti-Apoptosis        | -1.3                  | 2.1                   | DDIT4                        |                               | MmuSTS.813.1.S1_at      |
| Apoptosis                            | Pro-apoptotic         | 1.1                   | 6.8                   | H1d                          | Histone H1.2 (H1d)            | MmugDNA.35559.1.S1_at   |
| Apoptosis                            | Pro-apoptotic         | 2.1                   | 2.8                   | ITGB3BP                      | NRIF3                         | MmugDNA.16765.1.S1_at   |
| Apoptosis                            | Pro-apoptotic         | 1.3                   | 2.3                   | LGALS3                       | Galectin-3 (Galactose-speci   | MmugDNA.32094.1.S1_at   |
| Apoptosis                            | Pro-apoptotic         | 1.5                   | 2.3                   | PERP                         | PERP, TP53 apoptosis effe     | MmugDNA.13218.1.S1_at   |
| Apoptosis                            | Pro-apoptotic         | 1.3                   | 2.7                   | PERP                         | PERP, TP53 apoptosis effe     | MmuSTS.1155.1.S1_at     |
| Apoptosis                            | Pro-apoptotic         | -1.1                  | 2.2                   | PMAIP1                       | phorbol-12-myristate-13-ac    | MmugDNA.28813.1.S1_at   |
| Apoptosis                            | Pro-apoptotic         | 1.1                   | 2.1                   | CRADD                        |                               | MmuSTS.4151.1.S1_at     |
| Apoptosis                            | Pro-apoptotic         | 2.3                   | 2.0                   | CYCS                         | cytochrome c                  | MmugDNA.31771.1.S1_s_at |
| Apoptosis                            | Pro-apoptotic         | 2.4                   | 2.4                   | CYCS                         | cytochrome c                  | Mmu.4398.1.S1_s_at      |
| Apoptosis                            | Pro-apoptotic         | 2.3                   | 2.3                   | CYCS                         | cytochrome c                  | MmugDNA.31771.1.S1_at   |
| Apoptosis                            | Pro-apoptotic         | 2.3                   | 1.4                   | BR13BP                       | BR13-binding protein          | MmuSTS.560.1.S1_at      |
| Apoptosis                            | Pro-apoptotic         | 2.0                   | 1.9                   | IKIP                         | IKK interacting protein isofo | MmugDNA.13217.1.S1_at   |
| Apoptosis                            | Pro-apoptotic         | 3.3                   | 1.3                   | PACAP                        | Proapoptotic caspase adapt    | MmugDNA.22076.1.S1_at   |
| Apoptosis                            | Pro-apoptotic         | 2.9                   | 1.4                   | PACAP                        | Proapoptotic caspase adapt    | MmugDNA.12895.1.S1_s_at |
| Apoptosis                            | Pro-apoptotic         | -3.6                  | -1.9                  | NR4A1                        | nuclear receptor subfamily 4  | MmugDNA.18685.1.S1_at   |
| Apoptosis                            | Pro-apoptotic         | -2.2                  | -1.2                  | TIAM1                        | T-cell lymphoma invasion ar   | MmugDNA.20387.1.S1_at   |
| Apoptosis                            | Pro-apoptotic         | -2.2                  | -1.4                  | TNFRSF25                     | tumor necrosis factor recept  | MmugDNA.10013.1.S1_s_at |
| Apoptosis                            | Pro-apoptotic         | -2.1                  | -1.3                  | TNFRSF25                     | tumor necrosis factor recept  | MmugDNA.5862.1.S1_s_at  |
| B Cell Proliferation/Differentiation | Ig Related            | 4.5                   | -1.0                  | IGH chain complementarity    | Ig heavy chain complement     | MmuAffx.225.1.S1_at     |
| B Cell Proliferation/Differentiation | Ig Related            | 2.6                   | 1.4                   | LOC701504                    | Ig kappa chain V-II region H  | MmugDNA.31268.1.S1_at   |
| B Cell Proliferation/Differentiation | Ig Related            | 3.3                   | 1.7                   | LOC706650                    | Ig J chain                    | MmunewRS.816.1.S1_s_at  |
| B Cell Proliferation/Differentiation | Ig Related            | 2.1                   | 1.6                   | POU2AF1                      | ---                           | MmugDNA.21562.1.S1_at   |
| B Cell Proliferation/Differentiation | Ig Related            | 1.4                   | 2.0                   | TNFSF13B                     | BAFF (TNFSF13B)               | MmugDNA.31841.1.S1_at   |
| B Cell Proliferation/Differentiation | Ig Related            | 3.3                   | 2.2                   | IGHV                         | Ig heavy chain V-III region V | Mmu.12915.1.S1_at       |
| B Cell Proliferation/Differentiation | Ig Related            | 4.1                   | -1.1                  | Ig kappa chain V-II region R | Ig kappa chain V-II region R  | Mmu.9614.1.S1_at        |
| B Cell Proliferation/Differentiation | Ig Related            | 5.4                   | 1.7                   | Ig kappa chain V-II region R | Ig kappa chain V-II region R  | MmugDNA.3445.1.S1_at    |
| B Cell Proliferation/Differentiation | Ig Related            | 2.9                   | 1.2                   | Ig kappa chain V-II region R | Ig kappa chain V-II region R  | MmugDNA.41808.1.S1_at   |
| B Cell Proliferation/Differentiation | Ig Related            | 3.8                   | 1.5                   | IGHG1                        | Ig heavy chain V-I region H   | MmugDNA.15990.1.S1_s_at |
| B Cell Proliferation/Differentiation | Ig Related            | 3.8                   | 1.3                   | IGKC                         | Ig rearranged light chain var | Mmu.2571.1.S1_at        |
| B Cell Proliferation/Differentiation | Ig Related            | 2.9                   | 1.5                   | IGKC                         | Ig kappa chain V-I region W   | MmugDNA.39296.1.S1_at   |
| B Cell Proliferation/Differentiation | Ig Related            | 3.3                   | -1.4                  | IGKV                         | ---                           | MmugDNA.27721.1.S1_at   |
| B Cell Proliferation/Differentiation | Ig Related            | 2.6                   | 1.1                   | IGKV                         | immunoglobulin kappa light    | MmugDNA.37783.1.S1_x_at |
| B Cell Proliferation/Differentiation | Ig Related            | 2.9                   | -1.1                  | IGKV1-5                      | Ig kappa chain V-I region H   | MmugDNA.27721.1.S1_x_at |
| B Cell Proliferation/Differentiation | Ig Related            | 2.2                   | 1.1                   | IGKV1-5                      | Ig kappa chain V-I region H   | MmugDNA.16712.1.S1_at   |
| B Cell Proliferation/Differentiation | Ig Related            | -2.4                  | 2.3                   | IGLC2                        | Ig lambda chain V-I region E  | MmugDNA.15988.1.S1_s_at |
| B Cell Proliferation/Differentiation | Ig Related            | -1.0                  | 3.8                   | IGLC2                        | Ig lambda chain V-I region E  | MmugDNA.15791.1.S1_x_at |
| B Cell Proliferation/Differentiation | Ig Related            | 1.2                   | 2.7                   | IGVL                         | Ig lambda chain V-III region  | MmugDNA.29054.1.S1_at   |
| B Cell Proliferation/Differentiation | Ig Related            | -1.0                  | 2.6                   | IGHA1                        | IGHA1                         | MmugDNA.16283.1.S1_s_at |
| B Cell Proliferation/Differentiation | Ig Related            | -1.5                  | -2.2                  | IGSF10                       | immunoglobulin superfamily    | MmuSTS.91.1.S1_at       |
| B Cell Proliferation/Differentiation | Ig Related            | 1.3                   | -2.4                  | LOC390714                    |                               | MmugDNA.16715.1.S1_at   |
| B Cell Proliferation/Differentiation | Ig Related            | 1.2                   | -2.5                  | LOC723533                    |                               | Mmu.10484.2.S1_x_at     |
| Chemokine Receptors and Ligands      | SIV Coreceptor        | 1.4                   | 3.7                   | CCR5                         | chemokine (C-C motif) rece    | MmuSTS.1981.1.S1_at     |
| Chemokine Receptors and Ligands      | SIV Coreceptor        | 1.2                   | 3.8                   | CCR5                         | chemokine (C-C motif) rece    | Mmu.14249.1.S1_at       |
| Chemokine Receptors and Ligands      | SIV Coreceptor        | 1.9                   | 2.7                   | CCR2                         | chemokine (C-C motif) rece    | MmugDNA.36749.1.S1_at   |
| Chemokine Receptors and Ligands      | SIV Coreceptor        | 1.4                   | 2.3                   | CX3CR1                       | chemokine (C-X3-C motif) r    | MmugDNA.6875.1.S1_at    |
| Chemokine Receptors and Ligands      | SIV Coreceptor        | 1.1                   | 2.2                   | CXCR6 (STRL33/Bonzo)         | chemokine (C-X-C motif) re    | MmugDNA.34736.1.S1_at   |
| Chemokine Receptors and Ligands      | SIV Coreceptor        | 1.1                   | 2.1                   | CXCR6 (STRL33/Bonzo)         | chemokine (C-X-C motif) re    | MmuSTS.4018.1.S1_at     |
| Chemokine Receptors and Ligands      | SIV Coreceptor Ligand | 1.2                   | 5.8                   | CCL3 (MIP-1-alpha)           | chemokine (C-C motif) ligan   | Mmu.2053.1.S1_s_at      |
| Chemokine Receptors and Ligands      | SIV Coreceptor Ligand | 1.1                   | 3.1                   | CCL3 (MIP-1-alpha)           | chemokine (C-C motif) ligan   | MmuSTS.3571.1.S1_s_at   |
| Chemokine Receptors and Ligands      | SIV Coreceptor Ligand | 1.4                   | 3.5                   | CCL5 (RANTES)                | chemokine (C-C motif) ligan   | MmugDNA.43376.1.S1_s_at |
| Chemokine Receptors and Ligands      | SIV Coreceptor Ligand | 1.5                   | 3.6                   | CCL5 (RANTES)                | chemokine (C-C motif) ligan   | Mmu.8608.1.S2_at        |
| Chemokine Receptors and Ligands      |                       | 1.5                   | 2.5                   | CCL19 (MIP-3-beta)           | CCL19                         | MmugDNA.8496.1.S1_at    |
| Chemokine Receptors and Ligands      |                       | 1.5                   | 2.6                   | CCL25                        | Rab5ip                        | MmugDNA.33849.1.S1_at   |
| Chemokine Receptors and Ligands      |                       | 1.0                   | 2.2                   | CCR9                         | CCR9                          | MmugDNA.17952.1.S1_at   |

| Classification    | Sub-Classification           | SM Fold Changes 14dpi | RM Fold Changes 14dpi | Gene Symbol            | Gene Title                       | Affymetrix ID                |                       |
|-------------------|------------------------------|-----------------------|-----------------------|------------------------|----------------------------------|------------------------------|-----------------------|
| Immune Defenses   | IFN Related                  | 1.7                   | 3.3                   | OAS2                   | 2-5-oligoadenylate synthetase    | MmugDNA.43291.1.S1_at        |                       |
| Immune Defenses   | IFN Related                  | 2.4                   | 2.5                   | OAS2                   | 2-5-oligoadenylate synthetase    | MmugDNA.8486.1.S1_at         |                       |
| Immune Defenses   | IFN Related                  | 3.9                   | 4.3                   | MX1                    | myxovirus (influenza virus)      | MmuSTS.3006.1.S1_at          |                       |
| Immune Defenses   | IFN Related                  | 5.2                   | 6.1                   | IFIT1                  | IFIT1 (IFI-56)                   | MmuSTS.1579.1.S1_at          |                       |
| Immune Defenses   | IFN Related                  | 2.5                   | 4.2                   | IFIT3                  | IFIT3 (IFI-60)                   | interferon-induced protein w | MmugDNA.19594.1.S1_at |
| Immune Defenses   | IFN Related                  | 1.6                   | 2.6                   | IFIT3                  | IFIT3 (IFI-60)                   | interferon-induced protein w | Mmu.3779.1.S1_at      |
| Immune Defenses   | IFN Related                  | 2.6                   | 3.5                   | IFIT4                  | interferon-induced protein w     | MmugDNA.24962.1.S1_at        |                       |
| Immune Defenses   | IFN Related                  | 4.7                   | 6.8                   | IFI-15K (ISG15)        | interferon, alpha-inducible p    | MmugDNA.17118.1.S1_at        |                       |
| Immune Defenses   | IFN Related                  | 2.0                   | 3.9                   | IFIT7                  | putative ISG12(c) protein        | MmunewRS.254.1.S1_at         |                       |
| Immune Defenses   | IFN Related                  | 3.2                   | 2.9                   | IFI44                  | interferon-induced, hepatitis    | MmugDNA.12892.1.S1_at        |                       |
| Immune Defenses   | IFN Related                  | 3.1                   | 2.8                   | IFI44                  | interferon-induced, hepatitis    | MmuSTS.3682.1.S1_x_at        |                       |
| Immune Defenses   | IFN Related                  | 3.2                   | 2.2                   | GBP1                   | guanylate binding protein 1,     | MmugDNA.22912.1.S1_s_at      |                       |
| Immune Defenses   | IFN Related                  | 2.4                   | 2.1                   | GBP1                   | guanylate binding protein 1,     | Mmu.11961.1.S1_at            |                       |
| Immune Defenses   | IFN Related                  | 2.8                   | 2.5                   | GBP1                   | guanylate binding protein 1,     | MmugDNA.41315.1.S1_at        |                       |
| Immune Defenses   | IFN Related                  | 2.1                   | 2.4                   | GBP1                   | guanylate binding protein 1,     | Mmu.11960.1.S1_at            |                       |
| Immune Defenses   | IFN Related                  | 2.3                   | 1.9                   | GBP1                   | guanylate binding protein 1,     | Mmu.11961.1.S1_x_at          |                       |
| Immune Defenses   | IFN Related                  | 1.8                   | 2.2                   | GBP1                   | guanylate binding protein 1,     | Mmu.11960.1.S1_x_at          |                       |
| Immune Defenses   | IFN Related                  | 2.2                   | 2.6                   | GBP2                   | guanylate binding protein 2,     | MmuSTS.2397.1.S1_s_at        |                       |
| Immune Defenses   | IFN Related                  | 2.4                   | 2.0                   | GBP2                   | guanylate binding protein 2,     | MmugDNA.36433.1.S1_at        |                       |
| Immune Defenses   | IFN Related                  | 3.1                   | 3.4                   | RSAD2 (CIG5)           | radical S-adenosyl methioni      | MmugDNA.41706.1.S1_at        |                       |
| Immune Defenses   | IFN Related                  | 2.1                   | 5.3                   | RSAD2 (CIG5)           | ---                              | MmuSTS.1497.1.S1_at          |                       |
| Immune Defenses   | IFN Related                  | 1.8                   | 3.6                   | IFIT2                  | IFIT2 (IFI-54)                   | interferon-induced protein w | MmugDNA.5747.1.S1_at  |
| Immune Defenses   | IFN Related                  | 1.6                   | 3.2                   | IFIT5                  | interferon-induced protein w     | MmugDNA.7695.1.S1_at         |                       |
| Immune Defenses   | IFN Related                  | 1.1                   | 3.7                   | IFIT5                  | interferon-induced protein w     | MmuSTS.1580.1.S1_at          |                       |
| Immune Defenses   | IFN Related                  | 1.6                   | 3.3                   | ISG20                  | ISG20                            | MmugDNA.2176.1.S1_at         |                       |
| Immune Defenses   | IFN Related                  | 1.6                   | 2.6                   | MX2                    | myxovirus (influenza virus)      | MmuSTS.1927.1.S1_at          |                       |
| Immune Defenses   | IFN Related                  | 1.6                   | 2.1                   | SP100                  | SP100                            | MmugDNA.2761.1.S1_at         |                       |
| Immune Defenses   | Sentinel Molecules           | 1.5                   | 4.2                   | RIG-1 (DX58/RARRES3)   | retinoic acid receptor respon    | MmugDNA.24353.1.S1_at        |                       |
| Immune Defenses   | Sentinel Molecules           | 1.3                   | 2.9                   | RIG-1 (DX58/RARRES3)   | retinoic acid receptor respon    | MmugDNA.22077.1.S1_at        |                       |
| Immune Defenses   | Sentinel Molecules           | 1.5                   | 2.3                   | RIG-1 (DX58/RARRES3)   | retinoic acid receptor respon    | MmugDNA.22278.1.S1_at        |                       |
| Immune Defenses   | Sentinel Molecules           | 1.5                   | 2.9                   | RIG-1 (DX58/RARRES3)   | retinoic acid receptor respon    | MmugDNA.11735.1.S1_at        |                       |
| Immune Defenses   | Sentinel Molecules           | 1.1                   | 2.7                   | RIG-1 (DX58/RARRES3)   | TIG3                             | MmugDNA.8510.1.S1_s_at       |                       |
| Immune Defenses   | Sentinel Molecules           | 1.8                   | 2.3                   | MDA-5 (IFIH1)          | MDA-5                            | MmugDNA.36297.1.S1_at        |                       |
| Immune Defenses   | Sentinel Molecules           | 1.5                   | 2.1                   | PKR (EIF2AK2)          | PKR                              | MmugDNA.19136.1.S1_at        |                       |
| Immune Defenses   | Sentinel Molecules           | 1.2                   | 2.3                   | LY96                   | MD-2                             | MmugDNA.11614.1.S1_at        |                       |
| Immune Defenses   | NK Cells                     | 1.4                   | 13.4                  | KLRC1 (NKG2A)          | NKG2-B                           | Mmu.1906.10.S1_a_at          |                       |
| Immune Defenses   | NK Cells                     | 1.2                   | 2.0                   | KLRC1 (NKG2A)          | NKG2-A                           | Mmu.1906.5.S1_s_at           |                       |
| Immune Defenses   | NK Cells                     | 2.4                   | -1.4                  | KLRC1 (NKG2A)          | NKG2-A                           | MmuSTS.2945.1.S1_s_at        |                       |
| Immune Defenses   | NK Cells                     | 2.0                   | 2.2                   | KLRC2 (NKG2-C)         | killer cell lectin-like receptor | Mmu.1906.11.S1_a_at          |                       |
| Immune Defenses   | NK Cells                     | 1.7                   | 2.3                   | KLRD1(CD94)            | CD94                             | MmugDNA.32266.1.S1_at        |                       |
| Immune Defenses   | NK Cells                     | 1.5                   | 3.2                   | KLRD1(CD94)            | CD94                             | MmugDNA.9285.1.S1_at         |                       |
| Immune Defenses   | NK Cells                     | 1.5                   | 2.3                   | KLRD1(CD94)            | CD94                             | MmugDNA.17475.1.S1_s_at      |                       |
| Immune Defenses   | NK Cells                     | 1.4                   | 2.1                   | KLRC3 (NKG2-E)         |                                  | Mmu.1906.11.S1_x_at          |                       |
| Immune Defenses   | NK Cells                     | 1.6                   | 2.8                   | KLRC3 (NKG2-E)         |                                  | Mmu.1906.7.S1_at             |                       |
| Immune Defenses   | NK Cells                     | -1.4                  | 2.3                   | HLA-E                  | major histocompatibility com     | MmunewRS.790.1.S1_x_at       |                       |
| Immune Defenses   | NK Cells                     | -1.2                  | 2.9                   | HLA-E                  | major histocompatibility com     | MmunewRS.790.1.S1_at         |                       |
| Immune Defenses   | Antiviral Proteins           | 2.1                   | 2.0                   | TRIM25                 | Tripartite motif-containing 25   | Mmu.8122.1.A1_at             |                       |
| Immune Defenses   | Antiviral Proteins           | 2.2                   | 1.2                   | PTX3                   | pentraxin-related gene, rapin    | MmuSTS.3742.1.S1_at          |                       |
| Immune Defenses   | Antiviral Proteins           | 1.2                   | 3.1                   | APOBEC3G               | apolipoprotein B mRNA edit       | MmugDNA.33630.1.S1_at        |                       |
| Immune Defenses   | Antiviral Proteins           | 1.4                   | 2.1                   | APOBEC3H               |                                  | MmunewRS.633.1.S1_s_at       |                       |
| Immune Defenses   | Antiviral Proteins           | 1.5                   | 2.4                   | ATG16L1                | WDR30                            | MmugDNA.3016.1.S1_at         |                       |
| Immune Defenses   | Antiviral Proteins           | -1.4                  | -4.4                  | CLECSF14               | C-type lectin, superfamily m     | MmuSTS.1871.1.S1_at          |                       |
| Immune Defenses   | C' and FcRs                  | 3.0                   | 2.4                   | FCGR3B (CD16b)         | Fc fragment of IgG, low affir    | MmugDNA.738.1.S1_at          |                       |
| Immune Defenses   | C' and FcRs                  | 1.5                   | 2.4                   | C3 precursor           | No network object found          | MmugDNA.18099.1.S1_at        |                       |
| Immune Defenses   | C' and FcRs                  | 1.3                   | 2.5                   | CFB                    | C3bB *                           | MmugDNA.12153.1.S1_at        |                       |
| Immune Defenses   | C' and FcRs                  | 1.2                   | 2.8                   | FCN1                   | ficolin (collagen fibrinogen d   | MmugDNA.7797.1.S1_at         |                       |
| Immune Defenses   | C' and FcRs                  | 1.4                   | 3.8                   | LOC698390              | Ig lambda chain V-III region     | MmugDNA.38781.1.S1_at        |                       |
| Immune Defenses   | C' and FcRs                  | 1.0                   | 2.3                   | CD4BP4                 | complement component 4 b         | MmuSTS.3507.1.S1_at          |                       |
| Immune Defenses   | C' and FcRs                  | 3.6                   | 1.7                   | LMAN1                  | lectin, mannose-binding, 1       | Mmu.11962.1.S1_at            |                       |
| Immune Defenses   | C' and FcRs                  | -1.4                  | -2.4                  | FCER1A                 | High affinity immunoglobulin     | MmuSTS.4370.1.S1_at          |                       |
| Immune Defenses   | C' and FcRs                  | -2.5                  | 1.2                   | CFD                    | complement factor D prepro       | Mmu.2136.1.S1_at             |                       |
| Immune Defenses   | CD8 T cells, NK cells, and C | 4.4                   | 29.4                  | GZMA                   | Granzyme A precursor (Cyt)       | MmugDNA.36434.1.S1_at        |                       |
| Immune Defenses   | CD8 T cells, NK cells, and C | 2.3                   | 5.7                   | GZMB                   | Granzyme B precursor (T-cd       | MmugDNA.14204.1.S1_at        |                       |
| Immune Defenses   | CD8 T cells, NK cells, and C | 1.0                   | 2.3                   | GZMK                   | Granzyme K                       | MmugDNA.17084.1.S1_at        |                       |
| Immune Defenses   | CD8 T cells, NK cells, and C | 1.9                   | 3.1                   | GZMH                   | Granzyme H precursor (Cyt)       | MmugDNA.2086.1.S1_at         |                       |
| Immune Defenses   | CD8 T cells, NK cells, and C | 1.2                   | 2.1                   | PRF1                   | perforin 1                       | MmugDNA.13673.1.S1_s_at      |                       |
| Immune Defenses   | CD8 T cells, NK cells, and C | 1.3                   | 3.2                   | PRF1                   | perforin 1                       | MmugDNA.14985.1.S1_at        |                       |
| Immune Defenses   | CD8 T cells, NK cells, and C | -1.1                  | 2.1                   | PRG1                   | proteoglycan 1                   | MmugDNA.40727.1.S1_at        |                       |
| Immune Defenses   | CD8 T cells, NK cells, and C | 1.1                   | 2.1                   | IBRDC3                 | IBR domain containing 3          | MmugDNA.30847.1.S1_at        |                       |
| Immune Defenses   | DCs and DC-SIGN Related      | 1.7                   | 3.0                   | ADAMDEC1               |                                  | MmuSTS.2737.1.S1_at          |                       |
| Immune Defenses   | DCs and DC-SIGN Related      | -1.6                  | -3.5                  | CD209 (DC-SIGN/CLEC4L) | CD209                            | MmuSTS.3353.1.S1_at          |                       |
| Immune Defenses   | DCs and DC-SIGN Related      | -1.5                  | -2.3                  | CD209 (DC-SIGN/CLEC4L) | CD209                            | MmugDNA.24821.1.S1_s_at      |                       |
| Immune Defenses   | DCs and DC-SIGN Related      | -1.8                  | -2.4                  | CD209L (CLEC4M)        | DC-SIGNR                         | MmugDNA.36585.1.S1_at        |                       |
| Immune Defenses   | DCs and DC-SIGN Related      | -1.2                  | -2.3                  | CD209L2                |                                  | Mmu.5240.1.S1_at             |                       |
| Immune Activation | Activation                   | 2.8                   | 3.4                   | CD38                   | CD38 antigen                     | MmuSTS.1849.1.S1_at          |                       |
| Immune Activation | Activation                   | 2.6                   | 2.1                   | MKI67                  | Antigen KI-67                    | MmugDNA.32726.1.S1_at        |                       |
| Immune Activation | Activation                   | 2.1                   | 3.7                   | MKI67                  | Antigen KI-67                    | MmugDNA.32729.1.S1_at        |                       |
| Immune Activation | Activation                   | 2.6                   | 2.9                   | PCNA                   | proliferating cell nuclear ant   | MmugDNA.865.1.S1_at          |                       |
| Immune Activation | Activation                   | 2.4                   | 2.7                   | BAG2                   | BAG family molecular chap        | MmuSTS.2142.1.S1_at          |                       |
| Immune Activation | Activation                   | 2.8                   | 2.7                   | CAF-1                  | Chromatin assembly factor        | MmuSTS.673.1.S1_s_at         |                       |
| Immune Activation | Activation                   | 2.1                   | 2.4                   | FOXM1                  | forkhead box M1 isoform 3        | MmugDNA.11364.1.S1_at        |                       |
| Immune Activation | Activation                   | 3.1                   | 4.3                   | HERC5                  | hect domain and RLD 5            | MmugDNA.38910.1.S1_at        |                       |
| Immune Activation | Activation                   | 4.6                   | 3.5                   | PBK                    | T-LAK cell-originated protei     | MmugDNA.33387.1.S1_at        |                       |
| Immune Activation | Activation                   | 5.5                   | 4.2                   | SHCBP1                 | SHC SH2-domain binding p         | MmugDNA.30433.1.S1_at        |                       |
| Immune Activation | Activation                   | 2.3                   | 2.1                   | TPX2                   | TPX2, microtubule-associat       | MmuSTS.4420.1.S1_at          |                       |
| Immune Activation | Activation                   | 2.0                   | 2.3                   | TZFP                   | testis zinc finger protein       | MmuSTS.2900.1.S1_at          |                       |
| Immune Activation | Activation                   | 4.6                   | 4.4                   | UHRF1                  | ubiquitin-like, containing PH    | MmugDNA.19464.1.S1_at        |                       |



| Classification    | Sub-Classification | SM Fold Changes 14dpi | RM Fold Changes 14dpi | Gene Symbol              | Gene Title                                               | Affymetrix ID           |
|-------------------|--------------------|-----------------------|-----------------------|--------------------------|----------------------------------------------------------|-------------------------|
| Immune Activation | Activation         | 2.3                   | 2.5                   | <b>RFC3</b>              | replication factor C 3                                   | MmugDNA.18123.1.S1_at   |
| Immune Activation | Activation         | 2.2                   | 2.0                   | <b>RFC3</b>              | replication factor C 3                                   | MmugDNA.24482.1.S1_at   |
| Immune Activation | Activation         | 2.0                   | 1.4                   | <b>SLC16A1 (MCT1)</b>    | solute carrier family 16, member 1                       | MmuSTS.3828.1.S1_at     |
| Immune Activation | Activation         | 2.7                   | 1.6                   | <b>SLC16A1 (MCT1)</b>    | solute carrier family 16, member 1                       | MmugDNA.21701.1.S1_at   |
| Immune Activation | Activation         | 1.6                   | 2.4                   | <b>HSPD1</b>             | chaperonin // 60 kDa heat shock protein 1                | MmugDNA.36856.1.S1_at   |
| Immune Activation | Activation         | 2.1                   | 2.0                   | <b>HSPD1</b>             | heat shock 60kDa protein 1                               | MmugDNA.19456.1.S1_at   |
| Immune Activation | Activation         | 3.0                   | 3.4                   | <b>HELLS</b>             | helicase, lymphoid-specific                              | MmuSTS.61.1.S1_at       |
| Immune Activation | Activation         | 1.3                   | 2.1                   | <b>HELLS</b>             | HELLS (Lsh)                                              | MmugDNA.25108.1.S1_at   |
| Immune Activation | Activation         | 1.6                   | 2.3                   | <b>CALM3</b>             | Calmodulin *                                             | MmugDNA.35002.1.S1_at   |
| Immune Activation | Activation         | 1.4                   | 3.3                   | <b>GIG-1 (NKG7)</b>      | Protein NKG7 (Natural killer cell cytotoxicity factor 1) | MmugDNA.7157.1.S1_s_at  |
| Immune Activation | Activation         | 1.2                   | 2.1                   | <b>TMEM189-UBE2V1</b>    | Kua-UEV                                                  | MmugDNA.9196.1.S1_at    |
| Immune Activation | Activation         | 1.1                   | 2.1                   | <b>ADNP</b>              | ADNP                                                     | MmugDNA.42502.1.S1_at   |
| Immune Activation | Activation         | 1.4                   | 2.0                   | <b>HRASL2</b>            | HRAS-like suppressor 2                                   | MmugDNA.30775.1.S1_at   |
| Immune Activation | Activation         | 1.8                   | 2.0                   | <b>RAN</b>               | Ran                                                      | MmugDNA.3064.1.S1_at    |
| Immune Activation | Activation         | 1.1                   | 2.2                   | <b>NR3C1</b>             | GCR-alpha                                                | MmugDNA.1770.1.S1_at    |
| Immune Activation | Activation         | -1.2                  | -2.1                  | <b>MAF</b>               | c-Maf                                                    | MmugDNA.38245.1.S1_at   |
| Immune Activation | Activation         | -1.7                  | -2.5                  | <b>TSPAN7</b>            | tetraspanin 7                                            | MmuSTS.4036.1.S1_at     |
| Immune Activation | Activation         | -2.1                  | -1.7                  | <b>TSPAN7</b>            | tetraspanin 7                                            | Mmu.11195.1.S1_at       |
| Immune Activation | Activation         | -2.2                  | -1.0                  | <b>TCF7</b>              | transcription factor 7 (T-cell specific)                 | MmugDNA.40627.1.S1_s_at |
| Immune Activation | Cell Cycle         | 1.9                   | 3.0                   | <b>Anillin</b>           | anillin, actin binding protein                           | MmugDNA.682.1.S1_at     |
| Immune Activation | Cell Cycle         | 2.9                   | 3.3                   | <b>Anillin</b>           | anillin, actin binding protein                           | MmugDNA.2951.1.S1_at    |
| Immune Activation | Cell Cycle         | 4.8                   | 5.6                   | <b>Anillin</b>           | anillin, actin binding protein                           | MmugDNA.2951.1.S1_s_at  |
| Immune Activation | Cell Cycle         | 3.8                   | 3.2                   | <b>ASPM</b>              | asp (abnormal spindle)-like, centrosomal protein         | MmugDNA.5265.1.S1_at    |
| Immune Activation | Cell cycle         | 3.2                   | 4.6                   | <b>ASPM</b>              | asp (abnormal spindle)-like, centrosomal protein         | MmugDNA.25197.1.S1_at   |
| Immune Activation | Cell Cycle         | 3.5                   | 3.3                   | <b>BUB1</b>              | ---                                                      | MmugDNA.14075.1.S1_at   |
| Immune Activation | Cell Cycle         | 3.7                   | 4.5                   | <b>BUB1</b>              | BUB1 budding uninhibited by cyclin-dependent kinase 2    | MmugDNA.6277.1.S1_at    |
| Immune Activation | Cell Cycle         | 5.7                   | 5.8                   | <b>BUB1</b>              | BUB1 budding uninhibited by cyclin-dependent kinase 2    | MmuSTS.2164.1.S1_at     |
| Immune Activation | Cell Cycle         | 4.4                   | 6.7                   | <b>BUB1</b>              | BUB1 budding uninhibited by cyclin-dependent kinase 2    | MmuSTS.2164.1.S1_s_at   |
| Immune Activation | Cell Cycle         | 2.5                   | 3.4                   | <b>CASC5</b>             | cancer susceptibility candidate 5                        | MmugDNA.10186.1.S1_at   |
| Immune Activation | Cell Cycle         | 4.5                   | 5.7                   | <b>CDC2</b>              | cell division cycle 2 protein                            | MmugDNA.14959.1.S1_at   |
| Immune Activation | Cell Cycle         | 2.7                   | 2.8                   | <b>CDC2</b>              | cell division cycle 2 protein                            | MmugDNA.25206.1.S1_at   |
| Immune Activation | Cell Cycle         | 3.9                   | 5.3                   | <b>CDC2</b>              | cell division cycle 2 protein                            | MmugDNA.42865.1.S1_at   |
| Immune Activation | Cell Cycle         | 3.1                   | 3.5                   | <b>CDC20</b>             | cell division cycle 20                                   | MmugDNA.18794.1.S1_at   |
| Immune Activation | Cell Cycle         | 2.7                   | 3.5                   | <b>CDC25A</b>            | cell division cycle 25A isoform 1                        | MmugDNA.24430.1.S1_at   |
| Immune Activation | Cell Cycle         | 2.5                   | 2.4                   | <b>CDC6</b>              | CDC6 homolog                                             | MmuSTS.3380.1.S1_at     |
| Immune Activation | Cell Cycle         | 3.6                   | 1.8                   | <b>CDC6</b>              | CDC6 homolog                                             | MmugDNA.14956.1.S1_at   |
| Immune Activation | Cell Cycle         | 3.6                   | 4.6                   | <b>CDCA1</b>             | cell division cycle associated protein 1                 | MmugDNA.2768.1.S1_at    |
| Immune Activation | Cell Cycle         | 2.1                   | 3.5                   | <b>CDCA5</b>             | cell division cycle associated protein 5                 | MmugDNA.4124.1.S1_at    |
| Immune Activation | Cell Cycle         | 2.7                   | 2.9                   | <b>CDCA7</b>             | cell division cycle associated protein 7                 | MmugDNA.17329.1.S1_at   |
| Immune Activation | Cell Cycle         | 3.3                   | 4.6                   | <b>CDKN3</b>             | cyclin-dependent kinase inhibitor 3                      | MmugDNA.10778.1.S1_at   |
| Immune Activation | Cell Cycle         | 5.3                   | 4.6                   | <b>CDKN3</b>             | cytoskeleton associated protein 3                        | MmugDNA.6706.1.S1_at    |
| Immune Activation | Cell Cycle         | 5.0                   | 4.5                   | <b>CENPA</b>             | centromere protein A                                     | MmugDNA.15250.1.S1_at   |
| Immune Activation | Cell Cycle         | 1.8                   | 2.4                   | <b>CENPA</b>             | Centromere protein A (CENP-A)                            | MmugDNA.23496.1.S1_at   |
| Immune Activation | Cell Cycle         | 2.4                   | 3.1                   | <b>CENPF</b>             | centromere protein F (350/45 kDa)                        | MmuSTS.2672.1.S1_at     |
| Immune Activation | Cell Cycle         | 4.3                   | 5.5                   | <b>CEP55</b>             | centrosomal protein 55kDa                                | MmugDNA.5873.1.S1_at    |
| Immune Activation | Cell Cycle         | 2.7                   | 3.4                   | <b>CHEK1</b>             | CHK1 checkpoint homolog                                  | MmugDNA.15754.1.S1_at   |
| Immune Activation | Cell Cycle         | 2.2                   | 2.4                   | <b>CKS1B</b>             | Cyclin-dependent kinase 2 regulatory subunit 1B          | MmugDNA.15861.1.S1_s_at |
| Immune Activation | Cell Cycle         | 4.3                   | 4.6                   | <b>CKS2</b>              | CDC28 protein kinase 2                                   | MmugDNA.15862.1.S1_at   |
| Immune Activation | Cell Cycle         | 4.2                   | 3.8                   | <b>Cyclin A (CCNA2)</b>  | cyclin A                                                 | MmuSTS.3576.1.S1_at     |
| Immune Activation | Cell Cycle         | 2.2                   | 2.9                   | <b>Cyclin A (CCNA2)</b>  | cyclin A                                                 | MmugDNA.23764.1.S1_at   |
| Immune Activation | Cell Cycle         | 3.5                   | 3.6                   | <b>Cyclin B1 (CCNB1)</b> | cyclin B1                                                | MmuSTS.3318.1.S1_at     |
| Immune Activation | Cell Cycle         | 5.4                   | 4.8                   | <b>Cyclin B1 (CCNB1)</b> | cyclin B1                                                | MmugDNA.41268.1.S1_at   |
| Immune Activation | Cell Cycle         | 4.0                   | 5.6                   | <b>Cyclin B2 (CCNB2)</b> | cyclin B2                                                | MmugDNA.40742.1.S1_at   |
| Immune Activation | Cell Cycle         | 2.4                   | 2.8                   | <b>cyclin D2 (CCND2)</b> | G1/S-specific cyclin-D2                                  | MmugDNA.18851.1.S1_at   |
| Immune Activation | Cell Cycle         | 2.8                   | 2.6                   | <b>Cyclin E1 (CCNE1)</b> | cyclin E1 isoform 1                                      | MmugDNA.4085.1.S1_at    |
| Immune Activation | Cell Cycle         | 4.0                   | 4.6                   | <b>Cyclin E2 (CCNE2)</b> | cyclin E2 isoform 1                                      | MmuSTS.3320.1.S1_at     |
| Immune Activation | Cell Cycle         | 3.1                   | 3.2                   | <b>DTL</b>               | RA-regulated nuclear matrix protein                      | MmuSTS.1283.1.S1_at     |
| Immune Activation | Cell Cycle         | 1.9                   | 2.0                   | <b>DTL</b>               | DTL (hCdt2)                                              | MmugDNA.29544.1.S1_at   |
| Immune Activation | Cell Cycle         | 3.2                   | 3.0                   | <b>E2F7</b>              | E2F transcription factor 7                               | MmuSTS.2700.1.S1_at     |
| Immune Activation | Cell Cycle         | 2.7                   | 3.9                   | <b>ECT2</b>              | epithelial cell transforming factor 2                    | MmugDNA.5165.1.S1_at    |
| Immune Activation | Cell Cycle         | 2.1                   | 2.5                   | <b>FBXO5</b>             | F-box only protein 5                                     | MmugDNA.42135.1.S1_at   |
| Immune Activation | Cell Cycle         | 2.1                   | 2.5                   | <b>FBXO5</b>             | F-box only protein 5                                     | MmuSTS.4762.1.S1_at     |
| Immune Activation | Cell Cycle         | 3.6                   | 3.5                   | <b>GMNN</b>              | geminin, DNA replication inhibitor                       | MmuSTS.64.1.S1_at       |
| Immune Activation | Cell Cycle         | 3.1                   | 2.7                   | <b>GTSE1</b>             | G-2 and S-phase expressed protein 1                      | MmugDNA.9770.1.S1_at    |
| Immune Activation | Cell Cycle         | 3.0                   | 3.3                   | <b>GTSE1</b>             | G-2 and S-phase expressed protein 1                      | MmugDNA.33793.1.S1_at   |
| Immune Activation | Cell Cycle         | 2.1                   | 3.2                   | <b>GTSE1</b>             | G-2 and S-phase expressed protein 1                      | MmugDNA.36210.1.S1_at   |
| Immune Activation | Cell Cycle         | 1.9                   | 2.1                   | <b>GTSE1</b>             | GTSE1                                                    | MmugDNA.33793.1.S1_s_at |
| Immune Activation | Cell Cycle         | 3.9                   | 2.5                   | <b>HMMR (CD168)</b>      | hyaluronan-mediated motility receptor                    | MmugDNA.24653.1.S1_at   |
| Immune Activation | Cell Cycle         | 4.2                   | 3.7                   | <b>HMMR (CD168)</b>      | hyaluronan-mediated motility receptor                    | MmugDNA.32449.1.S1_at   |
| Immune Activation | Cell Cycle         | 2.1                   | 2.0                   | <b>HMMR (CD168)</b>      | hyaluronan-mediated motility receptor                    | MmugDNA.32449.1.S1_s_at |
| Immune Activation | Cell Cycle         | 2.0                   | 1.7                   | <b>GSPT1</b>             | G1 to S phase transition 1                               | MmuSTS.225.1.S1_at      |
| Immune Activation | Cell Cycle         | 2.2                   | 1.8                   | <b>INCENP</b>            | INCENP (Inner centromere protein)                        | MmugDNA.39805.1.S1_at   |
| Immune Activation | Cell Cycle         | 3.6                   | 4.7                   | <b>KIF11</b>             | kinesin family member 10                                 | MmugDNA.13565.1.S1_at   |
| Immune Activation | Cell Cycle         | 3.7                   | 6.5                   | <b>KIF14</b>             | kinesin family member 14                                 | MmugDNA.35622.1.S1_at   |
| Immune Activation | Cell Cycle         | 2.2                   | 2.7                   | <b>KIF18A</b>            | kinesin family member 18A                                | MmugDNA.32413.1.S1_at   |
| Immune Activation | Cell Cycle         | 3.6                   | 4.1                   | <b>KIF23</b>             | kinesin family member 22                                 | MmugDNA.13584.1.S1_at   |
| Immune Activation | Cell Cycle         | 2.2                   | 2.4                   | <b>KIF2C</b>             | kinesin family member 2C                                 | MmuSTS.1535.1.S1_at     |
| Immune Activation | Cell Cycle         | 1.8                   | 2.1                   | <b>KIF4A</b>             | KIF4A                                                    | MmugDNA.21462.1.S1_at   |
| Immune Activation | Cell Cycle         | 2.4                   | 2.6                   | <b>KIFC1</b>             | kinesin family member C1                                 | MmugDNA.9497.1.S1_at    |
| Immune Activation | Cell Cycle         | 2.6                   | 4.7                   | <b>KNSL7</b>             | kinesin family member 15                                 | MmugDNA.15585.1.S1_at   |
| Immune Activation | Cell Cycle         | 3.7                   | 4.2                   | <b>LOC696772</b>         | discs large homolog 7                                    | MmuSTS.2303.1.S1_s_at   |
| Immune Activation | Cell Cycle         | 3.2                   | 4.8                   | <b>MAD2A</b>             | Mitotic spindle assembly checkpoint protein 2A           | MmuSTS.4157.1.S1_at     |
| Immune Activation | Cell Cycle         | 2.6                   | 3.7                   | <b>MAD2L1</b>            | Mitotic spindle assembly checkpoint protein 2L1          | MmugDNA.17868.1.S1_at   |
| Immune Activation | Cell Cycle         | 2.3                   | 2.3                   | <b>MCM2</b>              | minichromosome maintenance complex component 2           | MmuSTS.144.1.S1_at      |
| Immune Activation | Cell Cycle         | 2.4                   | 3.5                   | <b>MCM3</b>              | minichromosome maintenance complex component 3           | MmugDNA.25436.1.S1_at   |
| Immune Activation | Cell Cycle         | 2.9                   | 3.2                   | <b>MCM6</b>              | minichromosome maintenance complex component 6           | MmugDNA.35554.1.S1_at   |
| Immune Activation | Cell cycle         | 4.2                   | 3.9                   | <b>MELK</b>              | maternal embryonic leucine kinase                        | MmuSTS.1558.1.S1_at     |

| Classification    | Sub-Classification           | SM Fold Changes 14dpi | RM Fold Changes 14dpi | Gene Symbol                      | Gene Title                    | Affymetrix ID           |
|-------------------|------------------------------|-----------------------|-----------------------|----------------------------------|-------------------------------|-------------------------|
| Immune Activation | Cell Cycle                   | 3.0                   | 3.7                   | MLF1IP                           | MLF1 interacting protein      | MmugDNA.11747.1.S1_at   |
| Immune Activation | Cell Cycle                   | 2.5                   | 1.6                   | MYBL2                            | MYB-related protein B         | MmugDNA.41887.1.S1_at   |
| Immune Activation | Cell Cycle                   | 3.0                   | 3.3                   | NDC80                            | kinetochore associated 2      | MmugDNA.36470.1.S1_at   |
| Immune Activation | Cell Cycle                   | 4.2                   | 4.2                   | NEK2                             | NIMA (never in mitosis gene)  | MmuSTS.1779.1.S1_at     |
| Immune Activation | Cell Cycle                   | 3.6                   | 5.2                   | NUSAP1                           | nucleolar and spindle assoc   | MmugDNA.38956.1.S1_at   |
| Immune Activation | Cell cycle                   | 3.6                   | 6.9                   | OIP5                             | Opa-interacting protein 5     | MmuSTS.3327.1.S1_at     |
| Immune Activation | Cell Cycle                   | 2.6                   | 2.3                   | PLK1                             | polo-like kinase              | MmuSTS.2029.1.S1_at     |
| Immune Activation | Cell Cycle                   | 2.7                   | 2.1                   | RACGAP1                          | MmuSTS.2069.1.S1_at           | MmuSTS.2069.1.S1_at     |
| Immune Activation | Cell Cycle                   | 2.7                   | 5.4                   | SGOL2                            | shugoshin-like 2              | MmugDNA.3428.1.S1_at    |
| Immune Activation | Cell Cycle                   | 2.8                   | 5.3                   | SGOL2                            | shugoshin-like 2              | MmugDNA.43348.1.S1_at   |
| Immune Activation | Cell Cycle                   | 2.5                   | 3.1                   | SMC2L1                           | structural maintenance of ch  | MmugDNA.18586.1.S1_at   |
| Immune Activation | Cell Cycle                   | 1.7                   | 3.1                   | SMC2L1                           | structural maintenance of ch  | MmugDNA.25187.1.S1_at   |
| Immune Activation | Cell Cycle                   | 2.1                   | 1.9                   | SMC4L1                           | SMC4 structural maintenand    | MmugDNA.31959.1.S1_at   |
| Immune Activation | Cell Cycle                   | 2.0                   | 2.0                   | SMC4L1                           | SMC4 structural maintenand    | MmugDNA.29900.1.S1_s_at |
| Immune Activation | Cell Cycle                   | 2.4                   | 3.0                   | SPAG5                            | sperm associated antigen 5    | MmugDNA.19272.1.S1_s_at |
| Immune Activation | Cell Cycle                   | 2.8                   | 3.8                   | SPC25                            | spindle pole body componen    | MmugDNA.20397.1.S1_at   |
| Immune Activation | Cell Cycle                   | 2.4                   | 2.5                   | STIL                             | SCL/TAL1 interrupting locus   | MmuSTS.220.1.S1_at      |
| Immune Activation | Cell Cycle                   | 2.1                   | 2.9                   | TIPIN                            | timeless-interacting protein  | MmugDNA.30164.1.S1_at   |
| Immune Activation | Cell Cycle                   | 3.9                   | 5.2                   | UBE2C                            | Ubiquitin-conjugating enzy    | MmugDNA.25384.1.S1_at   |
| Immune Activation | Cell Cycle                   | 2.0                   | 2.6                   | WEE1                             | Wee1-like protein kinase (W   | MmugDNA.3114.1.S1_at    |
| Immune Activation | Cell Cycle                   | 3.0                   | 4.2                   | ZWINT                            | ZW10 interactor (ZW10-inte    | MmugDNA.2694.1.S1_at    |
| Immune Activation | Cell Cycle                   | 2.4                   | 3.6                   | ZFPD1 (DP1)                      | transcription factor Dp-0     | MmugDNA.14322.1.S1_at   |
| Immune Activation | Cell Cycle                   | 1.6                   | 2.3                   | ZFPD1 (DP1)                      | transcription factor Dp-1     | MmuSTS.1343.1.S1_at     |
| Immune Activation | Cell Cycle                   | 2.1                   | 2.4                   | MCM7                             | minichromosome maintenar      | MmugDNA.30376.1.S1_at   |
| Immune Activation | Cell Cycle                   | 1.4                   | 2.0                   | MCM7                             | MCM4/6/7 complex *            | MmugDNA.34591.1.S1_s_at |
| Immune Activation | Cell Cycle                   | 1.7                   | 2.5                   | STK6                             | serine/threonine protein kin  | MmugDNA.3562.1.S1_at    |
| Immune Activation | Cell Cycle                   | 1.8                   | 3.1                   | STK6                             | serine/threonine protein kin  | MmugDNA.3558.1.S1_at    |
| Immune Activation | Cell Cycle                   | 2.0                   | 2.5                   | ZWILCH                           | Zwilch                        | MmugDNA.3020.1.S1_at    |
| Immune Activation | Cell Cycle                   | 1.5                   | 2.0                   | SLBP                             | SLBP                          | MmugDNA.14893.1.S1_at   |
| Immune Activation | Cell Cycle                   | 1.8                   | 2.1                   | MCTS1                            | MCT-1                         | MmugDNA.11610.1.S1_at   |
| Immune Activation | Cell Cycle                   | -1.0                  | 2.3                   | MAPK1                            | ERK1/2 *                      | MmugDNA.17107.1.S1_at   |
| Immune Activation | Cell Cycle                   | 1.8                   | 3.0                   | MCM10                            | minichromosome maintenar      | MmugDNA.8836.1.S1_at    |
| Immune Activation | Cell Cycle                   | 1.6                   | 2.3                   | MCM10                            | MCM10                         | MmugDNA.7717.1.S1_at    |
| Immune Activation | Cell Cycle                   | 1.9                   | 2.4                   | MCM4                             | MCM4                          | MmugDNA.26947.1.S1_at   |
| Immune Activation | Cell Cycle                   | 1.6                   | 2.3                   | MCM5                             | MCM5                          | MmuSTS.3146.1.S1_s_at   |
| Immune Activation | Cell Cycle                   | 1.5                   | 2.6                   | PLK4                             | STK18                         | MmugDNA.38024.1.S1_at   |
| Immune Activation | Cell Cycle                   | 2.0                   | 2.1                   | PRC1                             | PRC1                          | MmugDNA.21515.1.S1_at   |
| Immune Activation | Cell Cycle                   | 1.1                   | 2.1                   | RAD50                            | MRN complex *                 | MmugDNA.2663.1.S1_at    |
| Immune Activation | Cell Cycle                   | 1.3                   | 2.1                   | RAD50                            | MRN complex *                 | MmugDNA.21968.1.S1_at   |
| Immune Activation | Cell Cycle                   | 1.1                   | 2.0                   | RBL1                             | p107                          | MmugDNA.19044.1.S1_s_at |
| Immune Activation | Cell Cycle                   | -1.1                  | 2.1                   | S100A4                           | MTS1 (S100A4)                 | MmugDNA.17365.1.S1_at   |
| Immune Activation | Cell Cycle                   | 1.4                   | 2.1                   | SASS6                            | SASS6                         | MmugDNA.1933.1.S1_at    |
| Immune Activation | Cell Cycle                   | 1.6                   | 2.2                   | BCCIP                            | BCCIP                         | MmugDNA.5109.1.S1_at    |
| Immune Activation | Cell Cycle                   | 1.6                   | 2.0                   | BRCA2                            | breast cancer 2, early onset  | MmugDNA.41929.1.S1_at   |
| Immune Activation | Cell Cycle                   | 1.6                   | 2.6                   | BRIP1                            | BRCA1 interacting protein C   | MmugDNA.15158.1.S1_at   |
| Immune Activation | Cell Cycle                   | 2.0                   | 2.1                   | CDCA2                            | CDCA2                         | MmugDNA.24523.1.S1_at   |
| Immune Activation | Cell Cycle                   | 2.0                   | 2.1                   | CDCA2                            | CDCA2                         | MmugDNA.24523.1.S1_at   |
| Immune Activation | Cell Cycle                   | 1.8                   | 2.3                   | CDCA3                            | Tome-1                        | MmugDNA.21403.1.S1_at   |
| Immune Activation | Cell Cycle                   | 1.8                   | 2.3                   | CDCA3                            | Tome-1                        | MmugDNA.21403.1.S1_at   |
| Immune Activation | Cell Cycle                   | 2.1                   | 3.3                   | CDKN3                            | cyclin-dependent kinase inh   | MmugDNA.34975.1.S1_s_at |
| Immune Activation | Cell Cycle                   | 1.1                   | 2.5                   | CDT1                             | Cdt1                          | MmugDNA.7866.1.S1_at    |
| Immune Activation | Cell Cycle                   | 1.1                   | 2.5                   | CDT1                             | Cdt1                          | MmugDNA.7866.1.S1_at    |
| Immune Activation | Cell Cycle                   | 1.9                   | 2.1                   | CENPJ                            | CENPJ                         | MmugDNA.17253.1.S1_at   |
| Immune Activation | Cell Cycle                   | 1.9                   | 2.1                   | CENPJ                            | CENPJ                         | MmugDNA.17253.1.S1_at   |
| Immune Activation | Cell Cycle                   | 2.0                   | 2.5                   | CENPM                            | CENPM                         | MmugDNA.19768.1.S1_at   |
| Immune Activation | Cell Cycle                   | 2.0                   | 2.5                   | CENPM                            | CENPM                         | MmugDNA.19768.1.S1_at   |
| Immune Activation | Cell Cycle                   | 1.7                   | 2.4                   | CENPQ                            | Cenpq                         | MmugDNA.5876.1.S1_at    |
| Immune Activation | Cell Cycle                   | 1.7                   | 2.4                   | CENPQ                            | Cenpq                         | MmugDNA.5876.1.S1_at    |
| Immune Activation | Cell Cycle                   | 1.1                   | 2.1                   | CUL3                             | Cul3/KEAP1/Rbx1 E3 ligase     | MmugDNA.23767.1.S1_at   |
| Immune Activation | Cell Cycle                   | 1.2                   | 2.2                   | DCTN3                            | DCTN3                         | MmugDNA.14686.1.S1_s_at |
| Immune Activation | Cell Cycle                   | -1.4                  | 2.0                   | DOCK11                           | DOCK11                        | MmugDNA.10303.1.S1_at   |
| Immune Activation | Cell Cycle                   | 1.4                   | 2.1                   | ERH                              | ERH                           | MmugDNA.26837.1.S1_at   |
| Immune Activation | Cell Cycle                   | 1.5                   | 2.6                   | ESCO2                            | establishment of cohesion 1   | MmugDNA.10011.1.S1_at   |
| Immune Activation | Cytokine and Cytokine Recept | 2.2                   | 2.4                   | TFEC                             | TFEC                          | MmugDNA.17449.1.S1_at   |
| Immune Activation | Cytokine and Cytokine Recept | 2.1                   | 3.3                   | HMGB3                            | high-mobility group box 3     | MmuSTS.236.1.S1_at      |
| Immune Activation | Cytokine and Cytokine Recept | 1.8                   | 3.0                   | HMGB3                            | high-mobility group box 2     | MmugDNA.12988.1.S1_s_at |
| Immune Activation | Cytokine and Cytokine Recept | -1.0                  | 2.5                   | GREM1                            | Gremlin                       | MmugDNA.11761.1.S1_at   |
| Immune Activation | Cytokine and Cytokine Recept | -1.0                  | 4.0                   | GREM1                            | Gremlin                       | MmugDNA.42270.1.S1_at   |
| Immune Activation | Cytokine and Cytokine Recept | -1.1                  | 2.3                   | HNRNPM                           | hnRNP M                       | MmugDNA.15407.1.S1_at   |
| Immune Activation | Cytokine and Cytokine Recept | 1.3                   | 2.2                   | NEDD4L                           | NEDD4L                        | MmugDNA.36137.1.S1_at   |
| Immune Activation | Cytokine and Cytokine Recept | -2.0                  | -1.3                  | IL7R (CD127)                     | interleukin 7 receptor        | MmugDNA.8010.1.S1_at    |
| Immune Activation | Cytokine and Cytokine Recept | -1.4                  | -2.8                  | LIFR                             | Leukemia inhibitory factor r  | MmugDNA.14420.1.S1_at   |
| Immune Activation | TCR Signaling                | 1.5                   | 2.0                   | NCBP2                            | CBP20                         | MmugDNA.32753.1.S1_s_at |
| Immune Activation | TCR Signaling                | -1.1                  | 2.5                   | NCK1                             | NCK1                          | MmugDNA.36871.1.S1_at   |
| Immune Activation | TCR Signaling                | -1.2                  | 3.1                   | Beta-2-microglobulin             | --                            | MmugDNA.26370.1.S1_at   |
| Immune Activation | TCR Signaling                | -2.5                  | 4.4                   | Class I                          | Probe Set ID                  | MmugDNA.2178.1.S1_s_at  |
| Immune Activation | TCR signaling                | 1.7                   | 2.1                   | SHB                              | SHB                           | MmugDNA.11618.1.S1_at   |
| Immune Activation | TCR signaling                | -1.5                  | 2.2                   | TCR beta chain CTL-L17 precursor |                               | Mmu.4117.1.S1_at        |
| Immune Activation | TCR Signaling                | 1.2                   | 2.1                   | LY8E                             | TSA-1                         | MmugDNA.40394.1.S1_at   |
| Immune Activation | TCR Signaling                | -2.0                  | 2.0                   | TCR beta chain C region          | T-cell receptor beta chain C  | Mmu.126.1.S1_a_at       |
| Immune Activation | TCR Signaling                | -2.1                  | 1.5                   | TCR alpha chain C region         | T-cell receptor alpha chain C | MmugDNA.19732.1.S1_s_at |
| Immune Activation | TCR Signaling                | -2.4                  | 1.2                   | TCR rearranged beta-chain V.D    | T-cell receptor rearranged b  | Mmu.11421.1.S1_a_at     |
| Immune Activation | TCR Signaling                | -2.2                  | 1.1                   | LEF1                             | lymphoid enhancer binding 1   | Mmu.4923.1.S1_at        |
| Immune Activation | TCR Signaling                | -2.2                  | 1.1                   | LEF1                             | lymphoid enhancer binding 1   | MmuSTS.1438.1.S1_at     |
| Immune Activation | TCR Signaling                | -2.2                  | -1.2                  | LEF1                             | lymphoid enhancer binding 1   | MmugDNA.32273.1.S1_at   |
| Immune Activation | Transcriptional Regulators   | 2.1                   | 1.9                   | BRAD1                            | BRCA1 associated RING do      | MmuSTS.549.1.S1_at      |
| Immune Activation | Transcriptional Regulators   | 1.0                   | 2.4                   | ITCH                             | itchy homolog E3 ubiquitin p  | MmugDNA.17916.1.S1_at   |



| Classification                                         | Sub-Classification           | SM Fold Changes 14dpi | RM Fold Changes 14dpi | Gene Symbol      | Gene Title                    | Affymetrix ID           |
|--------------------------------------------------------|------------------------------|-----------------------|-----------------------|------------------|-------------------------------|-------------------------|
| Immune Activation                                      | Transcriptional Regulators   | 1.9                   | 2.5                   | E2F2             | E2F transcription factor 2    | MmugDNA.8851.1.S1_at    |
| Immune Activation                                      | Transcriptional Regulators   | 1.8                   | 2.6                   | TBX21            | T-box 21                      | MmuSTS.4557.1.S1_at     |
| Immune Activation                                      | Transcriptional Regulators   | 1.7                   | 2.2                   | NMI              | NMI                           | MmugDNA.30463.1.S1_at   |
| Immune Activation                                      | Transcriptional Regulators   | 5.2                   | 4.7                   | LOC715235        | chromosome condensation       | MmugDNA.11557.1.S1_at   |
| Immune Activation                                      | Transcriptional Regulators   | -1.6                  | -2.2                  | DAB2             | disabled homolog 2            | MmugDNA.16818.1.S1_at   |
| Immune Activation                                      | Transcriptional Regulators   | -1.3                  | -2.1                  | DAB2             | disabled homolog 2            | MmugDNA.36232.1.S1_at   |
| Immune Activation                                      | Transcriptional Regulators   | -1.1                  | -2.0                  | LITAF            | LITAF                         | MmugDNA.5336.1.S1_at    |
| Moderators of Activation & Inflammation                |                              | 1.1                   | -2.1                  | SELE (CD62E)     | E-selectin                    | MmugDNA.27403.1.S1_at   |
| Suppressor of Immune Activation                        |                              | -1.1                  | 2.1                   | CASP12           |                               | Mmu.3474.1.S1_at        |
| Suppressor of Immune Activation                        |                              | 1.0                   | 2.2                   | CASP12           | Caspase-12                    | MmugDNA.424.1.S1_at     |
| Suppressor of Immune Activation                        |                              | 1.6                   | 2.0                   | CREM             | CREM (activators)             | MmugDNA.9912.1.S1_at    |
| Suppressor of Immune Activation                        |                              | 1.2                   | 2.4                   | EHF              | ESE3                          | MmugDNA.17230.1.S1_at   |
| Suppressor of Immune Activation                        |                              | 1.9                   | 2.6                   | IDO              | indoleamine-pyrrole 2,3 dio   | MmugDNA.18432.1.S1_at   |
| Suppressor of Immune Activation                        |                              | 1.8                   | 2.1                   | KYNU             | KYNU                          | MmugDNA.22506.1.S1_s_at |
| Suppressor of Immune Activation                        |                              | 1.8                   | 2.2                   | PRDM1            | BLIMP1 (PRDI-BF1)             | MmugDNA.39211.1.S1_at   |
| Suppressor of Immune Activation                        |                              | 1.6                   | 2.6                   | SAP              | signaling lymphocyte activat  | MmugDNA.13157.1.S1_s_at |
| Suppressor of Immune Activation                        |                              | -1.1                  | 2.1                   | TANK             | TRAF family member-assoc      | MmugDNA.6841.1.S1_at    |
| Suppressor of Immune Activation                        |                              | 1.2                   | -2.8                  | CD33             | CD33 antigen (gp67)           | MmuSTS.1424.1.S1_at     |
| Suppressor of Immune Activation                        |                              | 1.1                   | -2.1                  | SSX2             | SSX2                          | MmugDNA.5682.1.S1_x_at  |
| Suppressor of Immune Activation                        |                              | 1.1                   | -2.2                  | SSX4             | SSX4 *                        | MmugDNA.7773.1.S1_at    |
| Moderators of Activation & Inflammation (Antioxidants) |                              | 4.0                   | 2.8                   | TNFRSF17 (CD269) | Tumor necrosis factor recep   | MmugDNA.5879.1.S1_at    |
| Moderators of Activation & Inflammation (Antioxidants) |                              | 4.0                   | 2.8                   | TNFRSF17 (CD269) | Tumor necrosis factor recep   | MmugDNA.5879.1.S1_at    |
| Moderators of Activation & Inflammation (Antioxidants) |                              | 4.1                   | 5.3                   | E2F8             | E2F family member 7           | MmugDNA.12490.1.S1_at   |
| Moderators of Activation & Inflammation (Antioxidants) |                              | 2.5                   | 3.2                   | PP1L5            | peptidylprolyl isomerase (cy  | MmugDNA.20073.1.S1_at   |
| Moderators of Activation & Inflammation (Antioxidants) |                              | 1.9                   | 2.1                   | KMO              | KMO                           | MmugDNA.25657.1.S1_at   |
| Moderators of Activation & Inflammation (Antioxidants) |                              | 1.6                   | 2.3                   | TMPO (LAP2)      | TMPOA                         | MmugDNA.3904.1.S1_at    |
| Moderators of Activation & Inflammation (Antioxidants) |                              | 1.9                   | 2.1                   | TMPO (LAP2)      | TMPOA                         | MmugDNA.41740.1.S1_at   |
| Moderators of Activation & Inflammation (Antioxidants) |                              | 3.0                   | 1.5                   | TXNDC5           | Thioredoxin domain-contain    | MmugDNA.2427.1.S1_at    |
| Moderators of Activation & Inflammation (Antioxidants) |                              | -2.2                  | 1.3                   | CD40LG (CD154)   | CD40 ligand (TNF superfam     | MmuSTS.4670.1.S1_s_at   |
| Moderators of Activation & Inflammation (Antioxidants) |                              | -2.3                  | 1.5                   | CD40LG (CD154)   | CD40 ligand (TNF superfam     | Mmu.4194.1.S1_at        |
| Moderators of Activation & Inflammation (Antioxidants) |                              | -2.1                  | -3.1                  | TIMD4            | T-cell immunoglobulin and r   | MmugDNA.1353.1.S1_at    |
| Moderators of Activation & Inflammation (Antioxidants) |                              | -2.6                  | 1.1                   | DGKA             | diacylglycerol kinase, alpha  | MmugDNA.1751.1.S1_at    |
| Moderators of Activation & Inflammation (Antioxidants) |                              | -2.1                  | 1.2                   | TSC22            | transforming growth factor b  | MmuSTS.4615.1.S1_at     |
| Moderators of Activation & Inflammation (Antioxidants) |                              | -2.3                  | -1.9                  | TXNIP            | thioredoxin interacting prote | MmugDNA.31894.1.S1_at   |
| Moderators of Activation & Inflammation (Antioxidants) |                              | -2.2                  | -1.1                  | TXNIP            | thioredoxin interacting prote | Mmu.7507.2.S1_at        |
| Moderators of Activation & Inflammation (Antioxidants) |                              | -2.6                  | -1.3                  | TXNIP            | thioredoxin interacting prote | MmugDNA.31894.1.S1_s_at |
| lymphatic vascular system                              |                              | 1.3                   | 2.1                   | GCH1             | GCH1                          | MmugDNA.41339.1.S1_at   |
| lymphatic vascular system                              |                              | -1.3                  | 3.2                   | GUCY1A3          | GUCY1A3                       | MmugDNA.10437.1.S1_at   |
| lymphatic vascular system                              |                              | 1.9                   | 2.0                   | HPSE             | Heparanase 1                  | MmugDNA.14910.1.S1_at   |
| lymphocyte homing                                      |                              | -1.2                  | 2.3                   | ITGA4 (CD49D)    | integrin, alpha 4 (antigen CD | MmugDNA.24387.1.S1_at   |
| lymphocyte homing                                      |                              | -1.2                  | 2.9                   | ITGA4 (CD49D)    | integrin, alpha 4 (antigen CD | MmuSTS.717.1.S1_at      |
| Metabolism                                             | Cystein Proteinase           | -1.1                  | 2.4                   | CST6             | Cystatin E/M                  | MmugDNA.35447.1.S1_at   |
| Metabolism                                             | Cystein Proteinase           | 1.2                   | 2.1                   | CST7             | Cystatin F                    | MmugDNA.6381.1.S1_at    |
| Metabolism                                             | Cystein Proteinase           | 1.2                   | 2.2                   | CSTA             | Cystatin A                    | MmugDNA.30019.1.S1_at   |
| Metabolism                                             | Cystein Proteinase           | 1.0                   | 2.3                   | CTSL2            |                               | MmuSTS.4178.1.S1_at     |
| Metabolism                                             | Lipids & Glucose             | 2.0                   | 2.1                   | FH               | fumarate hydratase            | MmuSTS.2656.1.S1_at     |
| Metabolism                                             | Lipids & Glucose             | 1.2                   | 2.1                   | CMAS             | cytidine monophosphate N-4    | Mmu.5431.1.S1_at        |
| Metabolism                                             | Lipids & Glucose             | 1.7                   | 2.0                   | PPP1R14B         | PHI-1                         | MmugDNA.1433.1.S1_s_at  |
| Metabolism                                             | Lipids & Glucose             | -1.0                  | 2.3                   | GALNT3           | GALNT3                        | MmugDNA.32216.1.S1_at   |
| Metabolism                                             | Lipids & Glucose             | 1.3                   | 2.2                   | GAPDH            |                               | AFFX-Mmu-gapdh-5_at     |
| Metabolism                                             | Lipids & Glucose             | 1.4                   | 2.1                   | GAPDH            |                               | AFFX-Mmu-gapdh-M_x_at   |
| Metabolism                                             | Lipids & Glucose             | 1.7                   | 2.2                   | GAPDH            | G3P1                          | MmugDNA.34587.1.S1_s_at |
| Metabolism                                             | Lipids & Glucose             | 1.0                   | 2.6                   | PCK1             |                               | MmunewRS.324.1.S1_at    |
| Metabolism                                             | Lipids & Glucose             | -1.0                  | 4.2                   | PCK1             |                               | MmuSTS.1126.1.S1_at     |
| Metabolism                                             | Lipids & Glucose             | -1.1                  | 2.0                   | UXS1             | UXS1                          | MmugDNA.31644.1.S1_at   |
| Metabolism                                             | Lipids & Glucose             | 1.0                   | 2.4                   | LOC706406        | aldo-keto reductase family 1  | Mmu.15276.1.S1_s_at     |
| Metabolism                                             | Lipids & Glucose             | 1.2                   | -2.1                  | ALDOB            | ALDOB                         | MmugDNA.17915.1.S1_at   |
| Metabolism                                             | Lipids & Glucose             | -1.1                  | -2.0                  | GAPDH11          | No network object found       | MmugDNA.32304.1.S1_at   |
| Metabolism                                             | Lipids & Glucose             | 1.1                   | -2.2                  | FABP3            | Fatty acid-binding protein *  | MmugDNA.40769.1.S1_s_at |
| Metabolism                                             | Lipids & Glucose             | -1.5                  | -3.3                  | LEPR             | Leptin receptor               | MmugDNA.43193.1.S1_at   |
| Metabolism                                             | Lipids & Glucose             | 1.5                   | 2.2                   | FABP5            |                               | MmunewRS.500.1.S1_at    |
| Metabolism                                             | Lipids & Glucose             | -1.5                  | 2.1                   | APOD             | APOD                          | MmugDNA.10643.1.S1_s_at |
| Metabolism                                             | Lipids & Glucose             | 1.1                   | 3.9                   | ENPP6            | ENPP6                         | MmugDNA.32991.1.S1_at   |
| Metabolism                                             | Lipids & Glucose             | 1.2                   | 2.0                   | PMVK             | PMVK                          | MmugDNA.15706.1.S1_at   |
| Metabolism                                             | Lipids & Glucose             | 1.0                   | 3.3                   | PLA2G7           | phospholipase A2, group VII   | MmugDNA.17938.1.S1_at   |
| Metabolism                                             | Lipids & Glucose             | 1.6                   | 2.0                   | MTHFD2L          | MTHFD2L                       | MmugDNA.37.1.S1_at      |
| Metabolism                                             | Lipids & Glucose             | 1.3                   | 5.7                   | ALDH1A3          |                               | MmuSTS.2795.1.S1_at     |
| Metabolism                                             | Lipids & Glucose             | 1.2                   | 2.7                   | ADRP             | Adipophilin (Adipose differ   | Mmu.6559.1.S1_s_at      |
| Metabolism                                             | Lipids & Glucose             | 1.3                   | 2.2                   | AGPS             | ADAS                          | MmugDNA.35890.1.S1_at   |
| Metabolism                                             | Lipids & Glucose             | 2.9                   | 1.6                   | CYP1B1           | cytochrome P450, family 1,    | MmuSTS.4020.1.S1_at     |
| Metabolism                                             | Lipids & Glucose             | 2.7                   | 2.0                   | CYP1B1           | cytochrome P450, family 1,    | MmugDNA.36286.1.S1_at   |
| Metabolism                                             | Lipids & Glucose             | 2.3                   | 1.6                   | CYP1B1           | cytochrome P450, family 1,    | MmugDNA.30721.1.S1_at   |
| Metabolism                                             | Lipids & Glucose             | 2.1                   | 1.4                   | MANEA            | mannosidase, endo-alpha       | MmugDNA.11821.1.S1_at   |
| Metabolism                                             | Lipids & Glucose             | 2.1                   | 1.4                   | STT3A            | integral membrane protein 4   | MmugDNA.21146.1.S1_at   |
| Metabolism                                             | Lipids & Glucose             | -1.8                  | -2.8                  | SCD              | ---                           | MmugDNA.24505.1.S1_at   |
| Metabolism                                             | Lipids & Glucose             | -2.0                  | 1.1                   | SCD              | stearoyl-CoA desaturase (d    | MmugDNA.38238.1.S1_at   |
| Metabolism                                             | Lipids & Glucose             | -2.3                  | -1.0                  | LGALS13          | Galactoside-binding soluble   | MmugDNA.43117.1.S1_at   |
| Metabolism                                             | Lipids & Glucose             | -2.2                  | 1.1                   | AMY2A            | amylase, alpha 2A; pancrea    | MmugDNA.4900.1.S1_s_at  |
| Metabolism                                             | Metals/Ions                  | 2.2                   | 2.6                   | PPA1             | pyrophosphatase 1             | Mmu.4786.2.S1_at        |
| Metabolism                                             | Metals/Ions                  | 2.3                   | 2.3                   | PPA1             | pyrophosphatase 1             | Mmu.4786.2.S1_s_at      |
| Metabolism                                             | Metals/Ions                  | 2.4                   | 2.1                   | PPA1             | pyrophosphatase 1             | MmugDNA.35236.1.S1_at   |
| Metabolism                                             | Metals/Ions                  | -1.1                  | 2.1                   | SCN3A            |                               | MmuSTS.2368.1.S1_at     |
| Metabolism                                             | Metals/Ions                  | 1.6                   | 2.1                   | CISD2            | CISD2                         | MmugDNA.2585.1.S1_at    |
| Metabolism                                             | Metals/Ions                  | 2.3                   | 2.0                   | KLHL23           | KLHL23                        | MmugDNA.36416.1.S1_at   |
| Metabolism                                             | Metals/Ions                  | 1.1                   | -2.2                  | SCNN1A           | ENaC *                        | MmugDNA.31086.1.S1_at   |
| Metabolism                                             | Metals/Ions                  | -1.1                  | -2.7                  | TRPC6            | TRPC6                         | MmugDNA.1894.1.S1_s_at  |
| Metabolism                                             | Mitochondrial Electron Trans | 1.1                   | -2.0                  | CYB5A            | Cytochrome B5                 | MmugDNA.32205.1.S1_at   |

| Classification | Sub-Classification           | SM Fold Changes 14dpi | RM Fold Changes 14dpi | Gene Symbol     | Gene Title                     | Affymetrix ID           |
|----------------|------------------------------|-----------------------|-----------------------|-----------------|--------------------------------|-------------------------|
| Metabolism     | Mitochondrial Electron Trans | 1.0                   | 2.2                   | CB310985        | Mitochondrial integral memb    | Mmu.6867.3.S1_s_at      |
| Metabolism     | Mitochondrial Electron Trans | 1.8                   | 3.9                   | CB549517        | Mitochondria NADH dehydr       | Mmu.3064.4.S1_s_at      |
| Metabolism     | Mitochondrial Electron Trans | -1.2                  | 2.5                   | CB549588        | Mitochondrial membrane ion     | Mmu.3044.13.S1_x_at     |
| Metabolism     | Mitochondrial Electron Trans | -1.0                  | 6.6                   | COX8C           | ---                            | MmugDNA.30366.1.S1_at   |
| Metabolism     | Mitochondrial Electron Trans | 1.2                   | 2.2                   | NDUFC2          | NDUFC2                         | MmugDNA.29870.1.S1_at   |
| Metabolism     | Mitochondrial Electron Trans | 1.3                   | 2.2                   | NDUFS8          | NDUFS8                         | MmugDNA.42544.1.S1_at   |
| Metabolism     | Mitochondrial Electron Trans | 1.4                   | 2.1                   | NDUFS8          | NDUFS8                         | MmugDNA.42544.1.S1_s_at |
| Metabolism     | Mitochondrial Electron Trans | 1.3                   | 2.1                   | UQCRRH          | ---                            | Mmu.10533.2.S1_s_at     |
| Metabolism     | Mitochondrial Electron Trans | -1.0                  | 4.6                   | COX1            | ---                            | Mmu.6867.1.A1_at        |
| Metabolism     | Mitochondrial Electron Trans | -1.8                  | 2.9                   | Mitochondrion   | mitochondrion, complete ge     | MmuMitochon.4.1.S1_at   |
| Metabolism     | Nucleic Acids                | 6.3                   | 6.0                   | RRM2            | ribonucleotide reductase M2    | MmugDNA.31369.1.S1_at   |
| Metabolism     | Nucleic Acids                | 2.8                   | 2.8                   | DHFR            | Dihydrofolate reductase        | MmugDNA.10792.1.S1_at   |
| Metabolism     | Nucleic Acids                | 1.6                   | 2.5                   | DHFR            | DHFR                           | MmugDNA.41835.1.S1_at   |
| Metabolism     | Nucleic Acids                | 2.3                   | 2.3                   | AHGY            | S-adenosylhomocysteine hy      | MmuSTS.44.1.S1_at       |
| Metabolism     | Nucleic Acids                | 6.0                   | 6.7                   | LOC700582       | Probable dimethyladenosin      | MmuSTS.3275.1.S1_at     |
| Metabolism     | Nucleic Acids                | 2.9                   | 4.3                   | TYMS            | thymidylate synthetase         | MmugDNA.30056.1.S1_at   |
| Metabolism     | Nucleic Acids                | 4.1                   | 4.5                   | TYMS            | thymidylate synthetase         | MmuSTS.4685.1.S1_at     |
| Metabolism     | Nucleic Acids                | 2.4                   | 2.0                   | FEN1            | flap structure-specific endon  | MmuSTS.2645.1.S1_at     |
| Metabolism     | Nucleic Acids                | 2.0                   | 1.6                   | GART            | phosphoribosylglycinamide      | MmugDNA.18615.1.S1_at   |
| Metabolism     | Nucleic Acids                | 2.4                   | 1.8                   | LOC695725       | uridine-cytidine kinase 2      | MmugDNA.43419.1.S1_at   |
| Metabolism     | Nucleic Acids                | 2.5                   | 2.0                   | NPM1            | Nucleophosmin (NPM) (Nuc       | MmugDNA.4269.1.S1_at    |
| Metabolism     | Nucleic Acids                | 2.1                   | 1.9                   | SYNCRIP         | NS1-associated protein 1 is    | MmugDNA.20772.1.S1_s_at |
| Metabolism     | Nucleic Acids                | 1.6                   | 2.2                   | RAP1GDS1        | ---                            | MmuSTS.3103.1.S1_at     |
| Metabolism     | Nucleic Acids                | 2.0                   | 2.5                   | RRM1            | RRM1                           | MmugDNA.26585.1.S1_at   |
| metabolism     | Nucleic Acids                | 1.3                   | 2.1                   | MSH2            | ---                            | MmuSTS.316.1.S1_at      |
| Metabolism     | Nucleic Acids                | 1.1                   | 2.1                   | NAT1            | NAT-1                          | MmugDNA.14909.1.S1_at   |
| Metabolism     | Nucleic Acids                | 1.2                   | 2.3                   | ARHGDB          | ---                            | MmuSTS.486.1.S1_at      |
| Metabolism     | Nucleic Acids                | 1.2                   | 2.0                   | ARL5A           | ARL5                           | MmugDNA.22459.1.S1_at   |
| Metabolism     | Nucleic Acids                | 1.7                   | 2.6                   | DCK             | ---                            | MmugDNA.36254.1.S1_at   |
| Metabolism     | Nucleic Acids                | 1.1                   | 2.5                   | BPNT1           | 3(2),5-bisphosphate nucleot    | MmugDNA.35881.1.S1_at   |
| Metabolism     | Nucleic Acids                | 1.4                   | 3.8                   | DNASE2B         | deoxyribonuclease II beta      | MmugDNA.36576.1.S1_at   |
| Metabolism     | Nucleic Acids                | 1.2                   | 2.4                   | HNRNPA2B1       | heterogeneous nuclear ribo     | Mmu.7150.1.S1_at        |
| Metabolism     | Nucleic Acids                | -1.0                  | 2.1                   | HNRPH2          | heterogeneous nuclear ribo     | MmuSTS.2520.1.S1_at     |
| Metabolism     | Nucleic Acids                | 1.4                   | 2.2                   | NEIL3           | nei endonuclease VIII-like 3   | MmugDNA.7448.1.S1_at    |
| Metabolism     | Nucleic Acids                | 1.2                   | 2.4                   | DUT             | dUTPase (DUT)                  | MmugDNA.20705.1.S1_at   |
| Metabolism     | Nucleic Acids                | 1.2                   | 2.1                   | ENTPD1          | ENP1                           | MmugDNA.14350.1.S1_at   |
| Metabolism     | Nucleic Acids                | 1.7                   | 2.3                   | NT5C3           | NT5C3                          | MmugDNA.12374.1.S1_at   |
| Metabolism     | Nucleic Acids                | 1.6                   | 2.1                   | NUDT21          | CPSF5                          | MmugDNA.6289.1.S1_at    |
| Metabolism     | Nucleic Acids                | 1.2                   | 2.0                   | SF3B14          | SF3B14a                        | MmugDNA.19706.1.S1_s_at |
| Metabolism     | Nucleic Acids                | 1.0                   | 2.1                   | SIP1            | SIP1                           | MmugDNA.28962.1.S1_s_at |
| Metabolism     | Nucleic Acids                | 1.8                   | 2.0                   | SNRPD1          | SNRPD1 (SMD1)                  | MmugDNA.25299.1.S1_at   |
| Metabolism     | Nucleic Acids                | 1.8                   | 2.2                   | SNRPF           | snRNP-F                        | MmugDNA.2701.1.S1_at    |
| Metabolism     | Nucleic Acids                | 1.6                   | 2.0                   | TXNL4A          | U5-15kD                        | MmugDNA.14759.1.S1_at   |
| Metabolism     | Proteins                     | 2.2                   | 2.1                   | SAR1B           | SAR1a gene homolog 2           | MmugDNA.38135.1.S1_at   |
| Metabolism     | Proteins                     | 2.1                   | 2.0                   | MRPL15          | mitochondrial ribosomal pro    | MmuSTS.954.1.S1_at      |
| Metabolism     | Proteins                     | 2.1                   | 2.0                   | MRPL19          | mitochondrial ribosomal pro    | MmuSTS.1524.1.S1_at     |
| Metabolism     | Proteins                     | 2.1                   | 1.7                   | DNAJB11         | DnaJ (Hsp40) homolog, sub      | MmuSTS.4249.1.S1_at     |
| Metabolism     | Proteins                     | 2.2                   | 1.5                   | ETF1            | eukaryotic translation termin  | MmugDNA.19076.1.S1_s_at |
| Metabolism     | Proteins                     | 2.0                   | 1.3                   | TRA1 ( HSP90B1) | tumor rejection antigen (gp9   | MmugDNA.6621.1.S1_at    |
| Metabolism     | Proteins                     | 2.0                   | 1.5                   | TRA1 ( HSP90B1) | tumor rejection antigen (gp9   | Mmu.4005.1.S1_s_at      |
| Metabolism     | Proteins                     | 2.3                   | 1.8                   | SPCS3           | signal peptidase complex su    | MmugDNA.32060.1.S1_s_at |
| Metabolism     | Proteins                     | 3.3                   | 1.7                   | PSAT1           | phosphoserine aminotransf      | MmugDNA.38346.1.S1_at   |
| Metabolism     | Proteins                     | 2.1                   | 1.5                   | PDI4A           | protein disulfide isomerase-   | MmugDNA.9838.1.S1_at    |
| Metabolism     | Proteins                     | -1.3                  | 2.2                   | MDN1            | Midasin                        | MmugDNA.10175.1.S1_at   |
| Metabolism     | Proteins                     | 1.9                   | 2.8                   | HERC6           | hect domain and RLD 6 iso      | MmugDNA.30921.1.S1_at   |
| Metabolism     | Proteins                     | 1.3                   | 2.3                   | MRPL3           | mitochondrial ribosomal pro    | MmugDNA.6717.1.S1_at    |
| Metabolism     | Proteins                     | 1.3                   | 2.1                   | PP1L            | Peptidyl-prolyl cis-trans isom | Mmu.7805.1.S1_at        |
| Metabolism     | Proteins                     | -1.2                  | 2.1                   | PP1L1           | Peptidylprolyl isomerase A     | MmugDNA.8983.1.S1_at    |
| Metabolism     | Proteins                     | 1.4                   | 2.3                   | SLD5            | SLD5                           | MmugDNA.33465.1.S1_s_at |
| Metabolism     | Proteins                     | 1.3                   | 2.1                   | DNAJA1          | ---                            | Mmu.10506.1.S1_at       |
| Metabolism     | Proteins                     | 1.5                   | 2.2                   | DNAJA1          | ---                            | Mmu.10506.1.S1_s_at     |
| Metabolism     | Proteins                     | 1.7                   | 2.4                   | DNAJA1          | Hdj-2                          | MmugDNA.19435.1.S1_s_at |
| Metabolism     | Proteins                     | -1.0                  | 2.8                   | ELAVL2          | ELAVL2                         | MmugDNA.33494.1.S1_at   |
| Metabolism     | Proteins                     | 1.2                   | 2.2                   | FXR1            | FXR1                           | MmugDNA.19474.1.S1_at   |
| Metabolism     | Proteins                     | 1.8                   | 2.1                   | MRPL12          | Large 39S subunit *            | MmugDNA.25924.1.S1_s_at |
| Metabolism     | Proteins                     | 1.5                   | 2.6                   | PFDA            | PFDA                           | MmugDNA.5521.1.S1_at    |
| Metabolism     | Proteins                     | 1.7                   | 2.1                   | PI4K2B          | PI4K2B                         | MmugDNA.25587.1.S1_at   |
| Metabolism     | Proteins                     | 1.2                   | 2.6                   | RPL12           | Large 60S subunit *            | MmugDNA.32762.1.S1_at   |
| Metabolism     | Proteins                     | -1.3                  | 2.3                   | METTL7A         | methyltransferase like 7A      | MmugDNA.37173.1.S1_at   |
| Metabolism     | Proteins                     | -1.1                  | 2.4                   | METTL7A         | METTL7A                        | MmugDNA.38570.1.S1_s_at |
| Metabolism     | Proteins                     | 1.0                   | 2.3                   | ENPP4           | ENPP4                          | MmugDNA.10334.1.S1_at   |
| Metabolism     | Proteins                     | 1.6                   | 2.0                   | SULT1C2         | ---                            | MmuSTS.2999.1.S1_at     |
| Metabolism     | Proteins                     | 1.1                   | 2.2                   | TPH1            | TPH1                           | MmugDNA.6193.1.S1_at    |
| Metabolism     | Proteins                     | -3.7                  | -1.0                  | LOC693289       | ATP-binding cassette, sub-f    | MmuSTS.2655.1.S1_at     |
| Metabolism     | Proteins                     | -4.1                  | -1.6                  | LOC714206       | ATP-binding cassette, sub-f    | MmunewRS.1009.1.S1_at   |
| metabolism     | Proteins                     | 1.2                   | -1.6                  | PRSS2           | Trypsin *                      | MmugDNA.22266.1.S1_at   |
| Metabolism     | Proteins                     | 1.3                   | -2.8                  | SAT             | Diamine acetyltransferase 1    | MmugDNA.30414.1.S1_at   |
| Metabolism     | Proteins                     | 1.1                   | -2.5                  | SULT2A1         | SULT2A1                        | MmugDNA.4194.1.S1_at    |
| Metabolism     | Proteins: Proteasome/Ubiqui  | 1.6                   | 2.1                   | PSMA2           | 26S proteasome (20S core)      | MmugDNA.22342.1.S1_at   |
| Metabolism     | Proteins: Proteasome/Ubiqui  | 1.7                   | 2.1                   | PSMA4           | 26S proteasome (20S core)      | MmugDNA.22344.1.S1_at   |
| Metabolism     | Proteins: Proteasome/Ubiqui  | 1.6                   | 2.0                   | PSMA5           | 26S proteasome (20S core)      | MmugDNA.22346.1.S1_at   |
| Metabolism     | Proteins: Proteasome/Ubiqui  | 1.5                   | 2.0                   | PSMA7           | 26S proteasome (20S core)      | MmugDNA.22347.1.S1_s_at |
| Metabolism     | Proteins: Proteasome/Ubiqui  | 1.4                   | 2.2                   | PSMB8           | Immunoproteasome (20S co       | MmugDNA.36047.1.S1_at   |
| Metabolism     | Proteins: Proteasome/Ubiqui  | 1.8                   | 2.3                   | PSMD14          | 26S proteasome (19S regul      | MmugDNA.13324.1.S1_at   |
| Metabolism     | Proteins: Proteasome/Ubiqui  | 1.4                   | 2.0                   | PSMG1           | DSCR2                          | MmugDNA.40337.1.S1_at   |
| Metabolism     | Proteins: Proteasome/Ubiqui  | 1.5                   | 2.1                   | CACYBP          | CacyBP(SIP)                    | MmugDNA.30673.1.S1_s_at |
| Metabolism     | Proteins: Proteasome/Ubiqui  | 1.3                   | 2.1                   | CACYBP          | CacyBP(SIP)                    | Mmu.11667.1.S1_at       |

| Classification | Sub-Classification                 | SM Fold Changes 14dpi | RM Fold Changes 14dpi | Gene Symbol | Gene Title                                                   | Affymetrix ID           |
|----------------|------------------------------------|-----------------------|-----------------------|-------------|--------------------------------------------------------------|-------------------------|
| Metabolism     | Proteins: Proteasome/Ubiquitin     | 1.0                   | 2.1                   | SUMO1       | SUMO-1                                                       | MmugDNA.31414.1.S1_at   |
| Metabolism     | Proteins: Proteasome/Ubiquitin     | 1.7                   | 2.4                   | UBE2L6      | UBCH8                                                        | MmugDNA.7052.1.S1_at    |
| Metabolism     | Proteins: Proteasome/Ubiquitin     | 1.7                   | 2.2                   | UCHL3       | UCHL3                                                        | MmugDNA.38706.1.S1_s_at |
| Metabolism     | Proteins: Proteasome/Ubiquitin     | -1.0                  | 2.0                   | ZYG11B      | ZYG11B                                                       | MmugDNA.12338.1.S1_at   |
| Metabolism     | Proteins: Proteasome/Ubiquitin     | 2.0                   | 2.3                   | PSMA3       | Proteasome subunit alpha 3                                   | MmugDNA.22343.1.S1_s_at |
| Metabolism     | Proteins: Proteasome/Ubiquitin     | 2.3                   | 2.1                   | UBE2S       | Ubiquitin-conjugating enzyme E2 S                            | MmugDNA.15298.1.S1_s_at |
| Metabolism     | Proteins: Proteasome/Ubiquitin     | 2.5                   | 2.2                   | UBE2S       | Ubiquitin-conjugating enzyme E2 S                            | MmugDNA.15298.1.S1_at   |
| Metabolism     | Proteins: Proteasome/Ubiquitin     | 2.2                   | 2.0                   | UBE2T       | Ubiquitin-conjugating enzyme E2 T                            | MmugDNA.22787.1.S1_at   |
| Metabolism     | Proteins: Proteasome/Ubiquitin     | 2.2                   | 2.1                   | UCHL5       | ubiquitin C-terminal hydrolase 5                             | Mmu.1412.1.S1_at        |
| Metabolism     | Proteins: Proteasome/Ubiquitin     | 2.1                   | 2.1                   | UCHL5       | ubiquitin C-terminal hydrolase 5                             | MmugDNA.15179.1.S1_at   |
| Metabolism     | Proteins: Proteasome/Ubiquitin     | 2.1                   | 2.3                   | UCHL5       | ubiquitin C-terminal hydrolase 5                             | MmuSTS.4734.1.S1_at     |
| Metabolism     | Proteins: Proteasome/Ubiquitin     | 2.3                   | 1.5                   | UBF2J1      | ubiquitin-conjugating enzyme E2 J1                           | MmugDNA.42067.1.S1_at   |
| Metabolism     | Proteins: Proteasome/Ubiquitin     | -1.0                  | -2.1                  | LOC695064   | promyelocytic leukemia zinc finger protein                   | MmuSTS.4766.1.S1_at     |
| Metabolism     | Proteins:eIF                       | 1.5                   | 2.5                   | EIF1AX      | EIF1AX                                                       | MmugDNA.41569.1.S1_at   |
| Metabolism     | Proteins:eIF                       | 1.4                   | 2.3                   | EIF1AX      | EIF1AX                                                       | MmugDNA.41569.1.S1_s_at |
| Metabolism     | Proteins:eIF                       | 1.3                   | 2.9                   | EIF4E       | EIF4E                                                        | MmugDNA.22671.1.S1_s_at |
| Metabolism     | Proteins:eIF                       | 1.5                   | 2.0                   | EIF4E       | EIF4E                                                        | MmugDNA.22673.1.S1_at   |
| Metabolism     | Proteins:eIF                       | 1.9                   | 5.5                   | EIF5A       | eukaryotic translation initiation factor 5A                  | MmugDNA.38446.1.S1_at   |
| Metabolism     | Proteins:eIF                       | 1.1                   | -2.4                  | EIF3C       | EIF3                                                         | MmugDNA.38182.1.S1_at   |
| Metabolism     | Water/ion transport                | 1.5                   | 3.7                   | AQP3        | aquaporin 3 (Gill blood group)                               | MmuSTS.1365.1.S1_s_at   |
| Metabolism     |                                    | 2.1                   | 1.2                   | NQO1        | NAD(P) <sup>+</sup> dehydrogenase, quinone                   | MmuSTS.3015.1.S1_at     |
| Metabolism     |                                    | 1.3                   | 6.4                   | AQP4        | aquaporin 4                                                  | MmugDNA.6205.1.S1_at    |
| metabolism     |                                    | 1.5                   | 2.0                   | STYX        | STYX                                                         | MmugDNA.37636.1.S1_at   |
| Others         | Cytoskeleton Related               | 2.2                   | 2.2                   | TUBA6       | tubulin alpha 6                                              | MmugDNA.32666.1.S1_s_at |
| Others         | Cytoskeleton Related               | 2.5                   | 3.1                   | DIAPH3      | diaphanous homolog 3                                         | MmugDNA.22775.1.S1_at   |
| Others         | Cytoskeleton Related               | 1.6                   | 2.1                   | DIAPH3      | mDia2(DIAPH3)                                                | MmugDNA.42203.1.S1_at   |
| Others         | DNA Replication/Repair             | 2.2                   | 2.7                   | RAD51       | RAD51 homolog protein isoform 1                              | MmugDNA.23761.1.S1_at   |
| Others         | DNA Replication/Repair             | 2.2                   | 3.1                   | HMGB2       | high-mobility group box 2                                    | MmuSTS.1347.1.S1_at     |
| Others         | DNA Replication/Repair             | 2.3                   | 2.4                   | GINS2       | GINS complex subunit 2 (Pif1)                                | MmuSTS.2066.1.S1_at     |
| Others         | DNA Replication/Repair             | 3.3                   | 2.8                   | POLE2       | DNA polymerase epsilon subunit 2                             | MmugDNA.2975.1.S1_at    |
| Others         | DNA Replication/Repair             | 2.5                   | 3.7                   | RAD51AP1    | RAD51-associated protein 1                                   | MmuSTS.4250.1.S1_at     |
| Others         | DNA Replication/Repair             | 4.7                   | 5.3                   | TOP2A       | DNA topoisomerase II, alpha                                  | MmugDNA.12273.1.S1_at   |
| Others         | DNA Replication/Repair             | 3.9                   | 5.8                   | TOP2A       | DNA topoisomerase II, alpha                                  | MmugDNA.12277.1.S1_at   |
| Others         | Nucleosome structure and Chromatin | 3.0                   | 4.0                   | LMNB1       | lamin B1                                                     | MmuSTS.1539.1.S1_at     |
| Others         | Nucleosome structure and Chromatin | 2.0                   | 2.3                   | HIST1H4J    | histone cluster 1, H4j (germline)                            | MmugDNA.3247.1.S1_at    |
| Others         | Nucleosome structure and Chromatin | 2.0                   | 2.6                   | HIST1H4J    | Hist4h4 *                                                    | MmugDNA.3247.1.S1_s_at  |
| Others         | Nucleosome structure and Chromatin | 2.4                   | 3.2                   | LOC703073   | Histone H2A.x (H2a/x)                                        | MmuSTS.8.1.S1_at        |
| Others         | Transcriptional Regulators         | 2.2                   | 2.2                   | EF2         | ELL associated factor 2                                      | MmugDNA.2321.1.S1_at    |
| Others         | Transcriptional Regulators         | 3.0                   | 3.3                   | EZH2        | enhancer of zeste 2                                          | MmuSTS.911.1.S1_at      |
| Others         | Transcriptional Regulators         | 2.1                   | 1.8                   | ATAD2       | ATPase family, two AAA domains                               | MmugDNA.12475.1.S1_s_at |
| Others         | Transcriptional Regulators         | 1.6                   | 2.1                   | ATAD2       | ATAD2                                                        | MmugDNA.31331.1.S1_at   |
| Others         | Transcriptional Regulators         | 1.5                   | 2.7                   | ATAD2       | ATAD2                                                        | MmugDNA.5276.1.S1_at    |
| Others         |                                    | 2.2                   | 3.3                   | ANP32E      | acidic (leucine-rich) nuclear phosphoprotein 32 kDa          | MmugDNA.22578.1.S1_at   |
| Others         |                                    | 2.4                   | 2.1                   | MTDH        | LYRIC/3D3                                                    | MmugDNA.81.1.S1_s_at    |
| Others         |                                    | 2.3                   | 2.2                   | MTDH        | LYRIC/3D3                                                    | MmugDNA.81.1.S1_at      |
| Others         |                                    | 2.4                   | 1.8                   | MTDH        | LYRIC/3D3/ metadherin                                        | Mmu.4898.1.S1_at        |
| Others         |                                    | 2.6                   | 2.7                   | NME1        | non-metastatic cells 1, protein                              | MmugDNA.21289.1.S1_at   |
| Others         |                                    | 3.6                   | 3.1                   | TRIP13      | thyroid hormone receptor interacting protein 13              | MmuSTS.4722.1.S1_at     |
| Others         |                                    | 5.0                   | 5.4                   | NSSATP9     | ---                                                          | MmugDNA.33823.1.S1_s_at |
| Others         |                                    | 2.7                   | 4.3                   | TMPRSS3     | Transmembrane protease, serine 3                             | MmuSTS.1653.1.S1_at     |
| Others         |                                    | 1.3                   | 2.0                   | MBNL1       | MBNL1                                                        | MmugDNA.11479.1.S1_at   |
| Others         |                                    | 1.4                   | 2.1                   | EPB41       | EPB41                                                        | MmugDNA.19045.1.S1_at   |
| Others         |                                    | 2.8                   | 1.9                   | ARNTL2      | aryl hydrocarbon receptor nuclear translocator-like family 2 | MmugDNA.13595.1.S1_at   |
| Others         |                                    | 2.6                   | 1.4                   | MOBK1B      | Mol1b                                                        | MmugDNA.6802.1.S1_at    |
| Others         |                                    | 2.1                   | 1.1                   | MOBK1B      | Mob4B protein (Mps One B)                                    | MmugDNA.23022.1.S1_s_at |
| Others         |                                    | -1.0                  | 2.2                   | GFRA3       | GFRA3                                                        | MmugDNA.29304.1.S1_at   |
| Others         |                                    | 1.5                   | 2.3                   | SUPT4H1     | SPT4                                                         | MmugDNA.24909.1.S1_s_at |
| Others         |                                    | -1.0                  | 2.5                   | CHIT1       | chitinase 1                                                  | MmuSTS.3643.1.S1_at     |
| Others         |                                    | -1.0                  | 2.3                   | ABI1        | E3b1(ABI-1)                                                  | MmugDNA.25737.1.S1_at   |
| Others         |                                    | 1.7                   | 2.2                   | SUCNR1      | GPR91                                                        | MmugDNA.3746.1.S1_at    |
| Others         |                                    | -1.1                  | 2.3                   | GPNUMB      | GPNUMB (Osteoactivin)                                        | MmugDNA.43116.1.S1_at   |
| Others         |                                    | 1.7                   | 3.3                   | SAMD9L      | sterile alpha motif domain containing 9L                     | MmugDNA.12043.1.S1_at   |
| Others         |                                    | 1.2                   | 2.8                   | SAMD9       | Sterile alpha motif domain-containing 9                      | MmugDNA.27315.1.S1_at   |
| Others         |                                    | 1.3                   | 2.0                   | ARPP-19     | ARPP-19                                                      | MmugDNA.7517.1.S1_at    |
| Others         |                                    | -1.7                  | 2.2                   | MALAT1      | metastasis associated lung adenocarcinoma transcript 1       | MmugDNA.13401.1.S1_s_at |
| Others         |                                    | -1.2                  | 3.0                   | SPINK2      | serine protease inhibitor, Kazal type 2                      | MmugDNA.18486.1.S1_s_at |
| Others         |                                    | 1.9                   | 2.2                   | DLEU2       | deleted in lymphocytic leukemia 2                            | MmugDNA.12590.1.S1_at   |
| Others         |                                    | 1.3                   | 2.1                   | DLEU2       | DLEU2                                                        | MmugDNA.36289.1.S1_s_at |
| Others         |                                    | -1.2                  | 3.7                   | HOPX        | homeodomain-only protein                                     | MmugDNA.13933.1.S1_at   |
| Others         |                                    | -1.0                  | 3.2                   | KIDINS220   | ---                                                          | MmugDNA.28052.1.S1_at   |
| Others         |                                    | 1.9                   | 2.8                   | LOC720683   | sperm tail protein SHIPPO1                                   | MmugDNA.38197.1.S1_at   |
| Others         |                                    | 2.1                   | 2.5                   | WDHD1       | WD repeat and HMG-box domain containing 1                    | MmugDNA.18618.1.S1_at   |
| Others         |                                    | -1.0                  | 2.5                   | DSC2        | DSC2                                                         | MmugDNA.18999.1.S1_at   |
| Others         |                                    | -1.0                  | 2.0                   | FER1L3      | Myoferlin                                                    | MmugDNA.28340.1.S1_at   |
| Others         |                                    | -1.0                  | 2.2                   | GIMAP2      | GIMAP2                                                       | MmugDNA.39974.1.S1_at   |
| Others         |                                    | 1.0                   | 2.1                   | KIAA1715    | KIAA1715                                                     | MmugDNA.7879.1.S1_at    |
| Others         |                                    | 1.6                   | 2.1                   | MRPS18C     | MRPS18 *                                                     | MmugDNA.10584.1.S1_s_at |
| Others         |                                    | 1.5                   | 2.1                   | MRPS28      | MRPS28                                                       | MmugDNA.32255.1.S1_at   |
| Others         |                                    | -1.2                  | 2.1                   | OSBP1L8     | ORP-family *                                                 | MmugDNA.31287.1.S1_at   |
| Others         |                                    | 1.3                   | 2.4                   | PKM2        | PKM2                                                         | Mmu.10820.1.S1_at       |
| Others         |                                    | -1.1                  | 2.6                   | TPR         | Nuclear pore complex protein                                 | MmugDNA.39372.1.S1_at   |
| Others         |                                    | 1.4                   | 2.3                   | WDHD1       | WDHD1                                                        | MmugDNA.37680.1.S1_at   |
| Others         |                                    | 2.0                   | 2.0                   | WHSC1       | WHSC1                                                        | MmugDNA.7428.1.S1_at    |
| Others         |                                    | 1.2                   | -3.4                  | MYH11       | CBFB/MYH11 fusion protein                                    | MmugDNA.33340.1.S1_at   |
| Others         |                                    | -2.4                  | -1.3                  | MYH11       | smooth muscle myosin heavy chain 11                          | MmugDNA.15137.1.S1_at   |
| Others         |                                    | -2.2                  | -1.2                  | MYH11       | smooth muscle myosin heavy chain 11                          | MmugDNA.33337.1.S1_at   |
| Others         |                                    | -2.0                  | 1.2                   | MBNL1       | Muscleblind-like (Drosophila)                                | MmugDNA.3546.1.S1_at    |

| Classification | Sub-Classification                                 | SM Fold Changes 14dpi | RM Fold Changes 14dpi | Gene Symbol     | Gene Title                                   | Affymetrix ID           |
|----------------|----------------------------------------------------|-----------------------|-----------------------|-----------------|----------------------------------------------|-------------------------|
| Others         |                                                    | -2.2                  | 1.5                   | EPB41           | Erythrocyte membrane protein                 | MmugDNA.16997.1.S1_at   |
| Others         |                                                    | -2.2                  | -1.2                  | TPM2            | tropomyosin 2 (beta) isoform                 | MmugDNA.6549.1.S1_at    |
| Others         |                                                    | -2.3                  | -1.0                  | CNR1            |                                              | MmugDNA.5294.1.S1_at    |
| Others         |                                                    | -2.6                  | 1.3                   | NOG             | Noggin precursor                             | MmugDNA.19120.1.S1_at   |
| Others         |                                                    | -3.2                  | -1.1                  | APBA2           | amyloid beta (A4) precursor                  | MmugDNA.18477.1.S1_at   |
| Others         |                                                    | -2.0                  | -1.1                  | FRZB            | frizzled-related protein                     | MmugDNA.39998.1.S1_at   |
| Others         |                                                    | -2.4                  | 1.4                   | LIN7A           | LIN-7 homolog A (LIN-7A) (                   | MmugDNA.33930.1.S1_at   |
| Others         |                                                    | -2.0                  | -1.7                  | CIRBP           | cold inducible RNA binding                   | MmugDNA.21025.1.S1_at   |
| Others         |                                                    | -2.5                  | -1.3                  | COCH            | coagulation factor C homolog                 | MmugDNA.12890.1.S1_at   |
| Others         |                                                    | -2.3                  | -1.3                  | COCH            | coagulation factor C homolog                 | MmuSTS.3519.1.S1_at     |
| Others         |                                                    | -2.0                  | 1.4                   | MAP7            | microtubule-associated protein               | MmugDNA.11043.1.S1_at   |
| Others         |                                                    | -2.1                  | -1.3                  | NEFH            | neurofilament, heavy polypeptide             | MmugDNA.18337.1.S1_at   |
| Others         |                                                    | -2.1                  | -1.2                  | WIF1            | Wnt inhibitory factor 1                      | MmuSTS.4753.1.S1_at     |
| Others         |                                                    | -2.1                  | 1.0                   | INADL           |                                              | MmugDNA.26275.1.S1_at   |
| Others         |                                                    | -1.9                  | -3.7                  | STAB1           | hypothetical protein LOC69                   | MmugDNA.42885.1.S1_at   |
| Others         |                                                    | -1.2                  | -2.9                  | PCDH9           | protocadherin alpha 9                        | MmuSTS.1120.1.S1_s_at   |
| Others         |                                                    | -1.4                  | -2.7                  | PCDH9           | protocadherin alpha 9                        | MmugDNA.7782.1.S1_at    |
| Others         |                                                    | -1.4                  | -2.8                  | PCDH9           | protocadherin alpha 9                        | MmuAffx.1252.1.A1_at    |
| Others         |                                                    | -1.0                  | -2.7                  | Titin           | titin isoform N2-A                           | MmugDNA.20569.1.S1_at   |
| Others         |                                                    | -1.2                  | -5.5                  | beta globin     | beta globin                                  | MmugDNA.2571.1.S1_s_at  |
| Others         |                                                    | -1.2                  | -6.5                  | beta globin     | beta globin                                  | MmugDNA.2571.1.S1_x_at  |
| Others         |                                                    | -1.2                  | -6.7                  | beta globin     | beta globin                                  | MmugDNA.2571.1.S1_at    |
| Others         |                                                    | -1.1                  | -5.2                  | beta globin     | beta globin                                  | MmugDNA.5184.1.S1_s_at  |
| Others         |                                                    | -1.2                  | -6.7                  | beta globin     | beta globin                                  | MmuAffx.949.1.S1_x_at   |
| Others         |                                                    | -1.4                  | -2.5                  | ADMR (GPR182)   |                                              | MmugDNA.20969.1.S1_at   |
| Others         |                                                    | -1.3                  | -2.5                  | ATRNL1          | attractin-like 1                             | MmugDNA.33011.1.S1_at   |
| Others         |                                                    | -1.1                  | -2.1                  | DAB2            |                                              | MmugDNA.41396.1.S1_at   |
| Others         |                                                    | -1.5                  | -2.1                  | DAB2            |                                              | MmugDNA.12457.1.S1_at   |
| Others         |                                                    | 1.1                   | -2.2                  | DOCK5           | DOCK5                                        | MmugDNA.4179.1.S1_at    |
| Others         |                                                    | 1.2                   | -2.7                  | GAGE1           | GAGE-2                                       | MmugDNA.40706.1.S1_s_at |
| Others         |                                                    | 1.0                   | -3.0                  | HBA1            | Adult hemoglobin *                           | MmugDNA.32562.1.S1_s_at |
| Others         |                                                    | 1.1                   | -2.1                  | HOXD12          | HOXD12                                       | MmugDNA.36471.1.S1_at   |
| Others         |                                                    | -1.1                  | -2.1                  | IRX1            |                                              | MmunewRS.464.1.S1_at    |
| Others         |                                                    | -1.3                  | -2.7                  | SHOX2           | SHOX2                                        | MmugDNA.3283.1.S1_at    |
| Others         |                                                    | -2.0                  | -1.4                  | NTRK2           | TrkB                                         | MmugDNA.41948.1.S1_at   |
| Others         | DNA Replication/Repair                             | 2.1                   | 1.4                   | EXO1            | exonuclease 1 isoform b                      | MmugDNA.17950.1.S1_s_at |
| Others         | ER-Golgi Related                                   | 2.0                   | 1.4                   | ERGIC1          | endoplasmic reticulum-golgi                  | MmugDNA.42416.1.S1_s_at |
| Others         | ER-Golgi Related                                   | 2.0                   | 1.5                   | ERGIC1          | endoplasmic reticulum-golgi                  | MmugDNA.42416.1.S1_at   |
| Others         | ER-Golgi Related                                   | 2.1                   | 1.5                   | SSR1            | Translocon-associated protein                | MmugDNA.7350.1.S1_s_at  |
| Others         | ER-Golgi Related                                   | -1.2                  | 2.0                   | GOLGA1          | Golgin-97                                    | MmugDNA.12907.1.S1_at   |
| Others         | Insulin-like Growth Factor Binding Protein Related | 2.2                   | 1.1                   | IMP-3           | insulin-like growth factor 2 n               | MmugDNA.31012.1.S1_at   |
| Others         | Insulin-like Growth Factor Binding Protein Related | 2.3                   | 1.3                   | IMP-3           | insulin-like growth factor 2 n               | MmugDNA.15520.1.S1_s_at |
| Others         | Insulin-like Growth Factor Binding Protein Related | -1.7                  | 2.2                   | AKT3            | v-akt murine thymoma viral                   | MmugDNA.2158.1.S1_at    |
| Others         | Insulin-like Growth Factor Binding Protein Related | -2.2                  | -1.8                  | ILGFBP3         | insulin-like growth factor binding protein 3 | Mmu.11638.2.S1_at       |
| Others         | Insulin-like Growth Factor Binding Protein Related | -3.0                  | -1.6                  | ILGFBP3         | insulin-like growth factor binding protein 3 | MmuSTS.2537.1.S1_at     |
| Others         | Insulin-like Growth Factor Binding Protein Related | -2.6                  | -1.5                  | ILGFBP3         | insulin-like growth factor binding protein 3 | MmugDNA.7729.1.S1_at    |
| Others         | Insulin-like Growth Factor Binding Protein Related | -2.1                  | 1.0                   | ILGFBP6         | insulin-like growth factor binding protein 6 | MmugDNA.23639.1.S1_at   |
| Others         | Insulin-like Growth Factor Binding Protein Related | -2.2                  | -1.0                  | ILGF11          | Insulin-like growth factor II p              | Mmu.4374.2.S1_s_at      |
| Others         | Insulin-like Growth Factor Binding Protein Related | 1.1                   | -2.5                  | LOC714042       | klotho isoform a                             | MmuSTS.1603.1.S1_at     |
| Others         | Post-Translational Modification                    | 2.1                   | 1.8                   | SUV39H2         | suppressor of variegation 3                  | MmugDNA.12443.1.S1_at   |
| Others         | Solute Carrier Family                              | 2.0                   | 1.7                   | SLC31A1         | High-affinity copper uptake                  | Mmu.7190.1.A1_at        |
| Others         | Solute Carrier Family                              | 2.3                   | 1.6                   | SLC7A5          | solute carrier family 7 (cation              | MmuSTS.3879.1.S1_at     |
| Others         | Transcriptional Regulators                         | 2.5                   | 1.5                   | ELL2            | elongation factor, RNA poly                  | MmuSTS.4317.1.S1_at     |
| Others         | Transcriptional Regulators                         | -2.0                  | -1.0                  | ID4             |                                              | MmuSTS.2533.1.S1_at     |
| Others         | Transcriptional Regulators                         | -2.1                  | 1.0                   | ---             | ---                                          | MmugDNA.11023.1.S1_at   |
| Others         | Vesicle Trafficking                                | 2.6                   | 1.5                   | SEC24A          | SEC24 related gene family,                   | MmugDNA.37864.1.S1_at   |
| Others         | Vesicle Trafficking                                | 2.2                   | 1.7                   | SEC24A          | SEC24 related gene family,                   | MmugDNA.37865.1.S1_at   |
| Others         | Cell-Adhesion Related                              | 1.6                   | 2.5                   | SIGLEC8 (CD329) | sialic acid binding immunoglobulin           | MmugDNA.32892.1.S1_at   |
| Others         | Cell-Adhesion Related                              | -1.5                  | 2.3                   | ITGB8           | ITGB8                                        | MmugDNA.42148.1.S1_at   |
| Others         | Cell-Adhesion Related                              | 1.1                   | 2.0                   | CEACAM5 (CD66e) | CEACAM5                                      | MmugDNA.11426.1.S1_at   |
| Others         | Cell-Adhesion Related                              | 1.2                   | 10.8                  | CEACAM6 (CD66c) | ---                                          | MmugDNA.24595.1.S1_at   |
| Others         | Cell-Adhesion Related                              | 1.0                   | 4.1                   | CEACAM6 (CD66c) | carcinoembryonic antigen-re                  | MmugDNA.4023.1.S1_at    |
| Others         | Cell-Adhesion Related                              | -1.0                  | 2.0                   | EMR2 (CD312)    | EMR2                                         | MmugDNA.34795.1.S1_at   |
| Others         | Cytoskeleton Related                               | -1.7                  | 2.0                   | IQGAP1          | IQGAP1                                       | MmugDNA.19813.1.S1_at   |
| Others         | Cytoskeleton Related                               | 1.2                   | 2.0                   | MGC39900        | No network object found                      | MmugDNA.40563.1.S1_at   |
| Others         | DNA Replication/Repair                             | 1.6                   | 2.2                   | RMI1            | BLAP75                                       | MmugDNA.33590.1.S1_at   |
| Others         | DNA Replication/Repair                             | 1.4                   | 2.3                   | RNASEH2B        | RNaseh2b                                     | MmugDNA.10980.1.S1_at   |
| Others         | DNA Replication/Repair                             | 1.8                   | 2.4                   | RPA3            | RPA3                                         | MmugDNA.13776.1.S1_s_at |
| Others         | DNA Replication/Repair                             | 1.0                   | 2.1                   | XRCC4           | XRCC4                                        | MmugDNA.13749.1.S1_s_at |
| Others         | DNA Replication/Repair                             | 1.7                   | 2.3                   | LIG1            | DNA ligase I                                 | MmugDNA.21105.1.S1_at   |
| Others         | DNA Replication/Repair                             | 1.9                   | 2.0                   | ORC6L           | ORC6L                                        | MmugDNA.18357.1.S1_at   |
| Others         | DNA Replication/Repair                             | 1.6                   | 2.1                   | SMC4            | CAP-C                                        | MmugDNA.20926.1.S1_at   |
| Others         | DNA Replication/Repair                             | 1.5                   | 2.0                   | ATIC            | PUR9                                         | MmugDNA.2533.1.S1_at    |
| Others         | DNA Replication/Repair                             | 1.2                   | 2.0                   | PRIM2           | DNA polymerase alpha/prim                    | MmugDNA.21556.1.S1_at   |
| Others         | DNA Replication/Repair                             | 1.5                   | 2.1                   | FANCI           | KIAA1794                                     | MmugDNA.25448.1.S1_at   |
| Others         | Epithelial Cells                                   | 1.8                   | 2.9                   | IQGAP3          | IQGAP3                                       | MmugDNA.36049.1.S1_at   |
| Others         | Epithelial Cells                                   | 1.1                   | 5.9                   | CK 6A           | Keratin, type II cytoskeletal                | MmuSTS.4448.1.S1_at     |
| Others         | Epithelial Cells                                   | 1.0                   | 3.0                   | SPRR3           | Small proline-rich protein 3                 | MmuSTS.1819.1.S1_at     |
| Others         | Epithelial Cells                                   | -1.1                  | 3.4                   | KRT5            | keratin 5                                    | MmugDNA.21974.1.S1_at   |
| Others         | Epithelial Cells                                   | 1.1                   | 2.2                   | KRT3            |                                              | MmuSTS.2954.1.S1_at     |
| Others         | Epithelial Cells                                   | 1.1                   | 2.1                   | KRTDAP          | KRTDAP                                       | MmugDNA.5366.1.S1_at    |
| Others         | Heat shock proteins                                | 1.3                   | 2.1                   | HSPB1           | HSPB1                                        | MmugDNA.20456.1.S1_at   |
| Others         | Heat shock proteins                                | 1.6                   | 2.2                   | HSP90AA1        | HSP90 *                                      | MmugDNA.854.1.S1_at     |
| Others         | Heat shock proteins                                | 1.9                   | 2.1                   | HSP E1          | HSP10 (mitochondrial)                        | MmugDNA.19457.1.S1_s_at |
| Others         | Heat shock proteins                                | 1.9                   | 2.1                   | HSPH1           | HSP105                                       | MmugDNA.14913.1.S1_at   |
| Others         | Heat shock proteins                                | 1.7                   | 2.1                   | HSPA4           | HSP70 *                                      | MmugDNA.4083.1.S1_s_at  |
| Others         | Nucleosome structure and C                         | 1.1                   | 2.0                   | NUP50           | NUP50                                        | MmugDNA.22310.1.S1_at   |

| Classification            | Sub-Classification             | SM Fold Changes 14dpi | RM Fold Changes 14dpi | Gene Symbol         | Gene Title                       | Affymetrix ID           |
|---------------------------|--------------------------------|-----------------------|-----------------------|---------------------|----------------------------------|-------------------------|
| Others                    | Nucleosome structure and C     | 1.5                   | 2.0                   | H2AFV               | H2AFV                            | MmugDNA.16722.1.S1_at   |
| Others                    | Nucleosome structure and C     | 1.7                   | 2.1                   | H2AFX               | Histone H2 *                     | MmugDNA.30974.1.S1_at   |
| Others                    | Nucleosome structure and C     | 1.4                   | 2.9                   | NHP2L1              | NHP2 non-histone chromos         | MmugDNA.3458.1.S1_at    |
| Others                    | Post-Translational Modificati  | 1.6                   | 2.1                   | SAE1                |                                  | MmugDNA.35341.1.S1_at   |
| Others                    | Post-Translational Modificati  | 1.6                   | 2.4                   | CBX5                | HP1 *                            | MmugDNA.34326.1.S1_at   |
| Others                    | Protein Translocation          | -1.3                  | 2.0                   | VPS13B              | COH1                             | MmugDNA.5302.1.S1_at    |
| Others                    | Protein Translocation          | 1.9                   | 2.4                   | TIMM17A             | TIM23-PAM complex *              | MmugDNA.10629.1.S1_at   |
| Others                    | Protein Translocation          | 1.5                   | 2.4                   | TIMM23              | TIM23-PAM complex *              | MmugDNA.40114.1.S1_at   |
| Others                    | Signal Transduction            | 1.4                   | 2.2                   | IIPR2               | IP3 receptor *                   | MmugDNA.21230.1.S1_at   |
| Others                    | Solute Carrier Family          | 1.9                   | 2.6                   | SLC16A10            | solute carrier family 16, mer    | MmugDNA.34150.1.S1_s_at |
| Others                    | Solute Carrier Family          | 1.6                   | 2.1                   | SLC25A46            | SLC25A46                         | MmugDNA.22043.1.S1_at   |
| Others                    | Solute Carrier Family          | 1.5                   | 2.0                   | SLC25A5             | ANT *                            | MmugDNA.9969.1.S1_at    |
| Others                    | Solute Carrier Family          | 1.0                   | -2.1                  | SLC13A4             | SLC13A4                          | MmugDNA.16904.1.S1_at   |
| Others                    | Solute Carrier Family          | 1.0                   | -2.0                  | SLC1A3              | GLAST1/EAAAT1                    | MmugDNA.20629.1.S1_at   |
| Others                    | Transcriptional Regulators     | -1.2                  | -2.1                  | LOC709735           | nuclear receptor subfamily 3     | MmugDNA.9427.1.S1_at    |
| Others                    | Transcriptional Regulators     | 1.1                   | -2.0                  | ZNF44               | ZNF44                            | MmugDNA.18822.1.S1_at   |
| Others                    | Transcriptional Regulators     | 1.2                   | 2.1                   | ENO1(MBP-1)         |                                  | Mmu.14495.1.S1_at       |
| Others                    | Transcriptional Regulators     | 1.3                   | 2.0                   | ENO1(MBP-1)         |                                  | Mmu.15249.2.S1_at       |
| Others                    | Transcriptional Regulators     | 1.0                   | 2.1                   | HNRNPR              | heterogeneous nuclear ribon      | Mmu.4422.1.S1_s_at      |
| Others                    | Transcriptional Regulators     | 1.5                   | 2.1                   | GTF3C6              | GTF3C6                           | MmugDNA.899.1.S1_at     |
| Others                    | Transcriptional Regulators     | 1.0                   | 2.0                   | ZNF254              | ZNF254                           | MmugDNA.11625.1.S1_at   |
| Others                    | Transcriptional Regulators     | 1.4                   | 2.0                   | POLR2G              | POLR2G                           | MmugDNA.3015.1.S1_at    |
| Others                    | Transcriptional Regulators     | 1.5                   | 2.3                   | POLR3K              | POLR3K                           | MmugDNA.16215.1.S1_at   |
| Others                    | Transcriptional Regulators     | 1.4                   | 2.1                   | TAF13               | TAF13                            | MmugDNA.16488.1.S1_at   |
| Others                    | Transcriptional Regulators     | 1.6                   | 3.1                   | TTF2                | transcription termination fac    | MmuSTS.2896.1.S1_s_at   |
| Others                    | Transcriptional Regulators     | 1.6                   | 2.2                   | MED18               | MED18                            | MmugDNA.27240.1.S1_at   |
| Others                    | Transcriptional Regulators     | 1.1                   | 2.0                   | SSA2                | Sjogren syndrome antigen A       | MmugDNA.22925.1.S1_at   |
| Others                    | Transcriptional Regulators     | 1.1                   | 2.4                   | JARID1A             | RBB2                             | MmugDNA.42720.1.S1_at   |
| Others                    | Transcriptional Regulators     | -1.2                  | 2.1                   | YY1AP1              | YAP (HCCA2)                      | MmugDNA.36917.1.S1_at   |
| Others                    | Transcriptional Regulators     | -1.2                  | 2.3                   | RQCD1               | RQCD1                            | MmugDNA.23157.1.S1_at   |
| Others                    | Transcriptional Regulators     | 1.1                   | 2.8                   | ZNF33A              | zinc finger protein 33a (KOX     | MmugDNA.12643.1.S1_at   |
| Others                    | Transcriptional Regulators     | 1.1                   | 2.1                   | EYA4                | EYA4                             | MmugDNA.33614.1.S1_at   |
| Others                    | Transcriptional Regulators     | 1.5                   | 2.9                   | NSBP1               | NSBP1                            | MmugDNA.32637.1.S1_at   |
| Others                    | Transcriptional Regulators     | -1.1                  | 2.2                   | TCF21(Capsulin)     | Transcription factor 21          | MmugDNA.4384.1.S1_at    |
| Others                    | Transcriptional Regulators     | 1.2                   | 2.4                   | ZNF326              | ZNF326                           | MmugDNA.4607.1.S1_at    |
| Others                    | Vesicle Trafficking            | 1.9                   | 2.2                   | SEC24D              | COPII *                          | MmugDNA.12530.1.S1_at   |
| Others                    | Vesicle Trafficking            | 1.2                   | 2.0                   | VPS29               | VPS29                            | MmugDNA.39821.1.S1_at   |
| Others                    | Vesicle Trafficking            | -1.1                  | 2.1                   | STX8                | Syntaxin 8                       | MmugDNA.42140.1.S1_at   |
| Others                    | Vesicle Trafficking            | -1.3                  | 2.1                   | SCFD1               | SCFD1                            | MmugDNA.27824.1.S1_at   |
| Others                    | Splicosome                     | 1.6                   | 2.4                   | LSM5                | LSM5                             | MmugDNA.15339.1.S1_at   |
| Others                    | Splicosome                     | 1.4                   | 2.1                   | LSM5                | LSM5                             | MmugDNA.32606.1.S1_s_at |
| Others                    | Splicosome                     | 1.5                   | 2.9                   | MAGOHB              | FLJ10292                         | MmugDNA.4402.1.S1_at    |
| Others                    | Epithelial Cell Related        | 1.0                   | 2.4                   | SPRR1B              | Cornifin B                       | MmugDNA.2820.1.S1_at    |
| Others                    | Epithelial Cell Related        | 1.0                   | 2.3                   | RPTN                | Rptn                             | MmugDNA.41659.1.S1_at   |
| Others                    | p53-Related                    | 1.2                   | 2.0                   | RCHY1               | PIRH2                            | MmugDNA.6164.1.S1_s_at  |
| Others                    | p53-Related                    | 1.3                   | 2.0                   | TPRKB               | CGI-121                          | MmugDNA.36086.1.S1_at   |
| Others                    | p53-Related                    | 1.5                   | 2.1                   | TPRKB               | CGI-121                          | MmugDNA.36086.1.S1_s_at |
| Tissue Repair, Remodeling |                                | 2.8                   | 2.7                   | SCIN                | scinderin                        | MmuSTS.1778.1.S1_at     |
| Tissue Repair, Remodeling |                                | -1.5                  | -2.4                  | FZD10               |                                  | MmuSTS.3644.1.S1_at     |
| Tissue Repair, Remodeling | Extracellular Matrix Structura | -2.0                  | -2.4                  | STAB2               | stabilin 2                       | MmugDNA.15867.1.S1_at   |
| Tissue Repair, Remodeling | Extracellular Matrix Structura | -2.1                  | 1.3                   | DCN                 | decorin                          | MmugDNA.32965.1.S1_at   |
| Tissue Repair, Remodeling | Extracellular Matrix Structura | -2.1                  | 1.1                   | DCN                 | decorin                          | MmugDNA.14528.1.S1_s_at |
| Tissue Repair, Remodeling | Extracellular Matrix Structura | -2.2                  | 1.4                   | DCN                 | decorin                          | MmugDNA.22700.1.S1_at   |
| Tissue Repair, Remodeling | Extracellular Matrix Structura | -2.2                  | -1.7                  | DPT                 | Dermatopontin precursor (T       | MmugDNA.35051.1.S1_at   |
| Tissue Repair, Remodeling | Extracellular Matrix Structura | -2.1                  | -1.1                  | SPOCK2              | sparc/osteonectin, cwcv and      | MmugDNA.7832.1.S1_at    |
| Tissue Repair, Remodeling | Extracellular Matrix Structura | 1.0                   | -2.2                  | TNC                 | Tenascin-C                       | MmugDNA.19512.1.S1_at   |
| Tissue Repair, Remodeling | Extracellular Matrix Structura | 1.0                   | -2.4                  | TNC                 | Tenascin-C                       | MmugDNA.39792.1.S1_at   |
| Tissue Repair, Remodeling | Extracellular Matrix Structura | 1.2                   | -2.7                  | COL5A3              | COL5A3                           | MmugDNA.37545.1.S1_at   |
| Tissue Repair, Remodeling | Extracellular Matrix Structura | -2.0                  | -2.2                  | Claudin 5           | claudin 5                        | MmuSTS.3423.1.S1_at     |
| Tissue Repair, Remodeling | Extracellular Matrix Structura | 1.0                   | -2.1                  | FGF10               | FGF10                            | MmugDNA.6246.1.S1_at    |
| Tissue Repair, Remodeling | Extracellular Matrix Structura | 2.1                   | -1.2                  | SDC1 (CD138)        | Syndecan-1 precursor (SYN        | MmugDNA.27367.1.S1_x_at |
| Tissue Repair, Remodeling | Extracellular Matrix Structura | 2.2                   | -1.1                  | SDC1 (CD138)        | Syndecan-1 precursor (SYN        | MmugDNA.27367.1.S1_at   |
| Tissue Repair, Remodeling | Extracellular Matrix Structura | 2.1                   | 1.7                   | ECGF1               | endothelial cell growth fact     | MmugDNA.9266.1.S1_at    |
| Tissue Repair, Remodeling | Extracellular Matrix Structura | 1.6                   | 3.5                   | ERPINA3             | alpha-1-antichymotrypsin         | Mmu.10083.1.S1_s_at     |
| Tissue Repair, Remodeling | Extracellular Matrix Structura | 1.7                   | 2.2                   | TUBB                | tubulin, beta, 4 /// tubulin, be | MmugDNA.20252.1.S1_at   |
| Tissue Repair, Remodeling | Extracellular Matrix Structura | 1.8                   | 2.2                   | TUBB2C              | Tubulin (in microtubules) *      | MmugDNA.6145.1.S1_s_at  |
| Tissue Repair, Remodeling | Extracellular Matrix Structura | 1.1                   | 4.9                   | MMP1                |                                  | MmuSTS.921.1.S1_at      |
| Tissue Repair, Remodeling | Oxidative-Stress Related       | 2.4                   | 2.4                   | SOD2                | superoxide dismutase 2, mi       | MmugDNA.24030.1.S1_at   |
| Tissue Repair, Remodeling | Oxidative-Stress Related       | 1.4                   | 2.5                   | CLU (APO-J)         |                                  | MmugDNA.25040.1.S1_at   |
| Tissue Repair, Remodeling | Oxidative-Stress Related       | -1.3                  | -2.1                  | CD163 (M160)        | scavenger receptor cysteine      | MmugDNA.27987.1.S1_at   |
| Tissue Repair, Remodeling | Nerve Related Growth Factor    | -1.1                  | -2.5                  | GRIA2               | glutamate receptor, ionotroff    | MmugDNA.37346.1.S1_at   |
| Tissue Repair, Remodeling | Nerve Related Growth Factor    | -1.5                  | -2.5                  | GRIA2               | glutamate receptor, ionotroff    | MmugDNA.27764.1.S1_at   |
| Tissue Repair, Remodeling | Nerve Related Growth Factor    | 5.0                   | 5.1                   | UCH-L1 (PGP9.5)     | Ubiquitin carboxyl-terminal      | MmugDNA.7056.1.S1_s_at  |
| Tissue Repair, Remodeling | Nerve Related Growth Factor    | 5.0                   | 5.0                   | UCH-L1 (PGP9.5)     | Ubiquitin carboxyl-terminal      | MmugDNA.7056.1.S1_at    |
| Tissue Repair, Remodeling | Nerve Related Growth Factor    | 1.2                   | 2.0                   | SERPINI1            | Neuroserpin                      | MmugDNA.18538.1.S1_at   |
| Tissue Repair, Remodeling | Nerve Related Growth Factor    | 1.1                   | 2.0                   | KIF1B               | kinesin family member 1B         | MmugDNA.3072.1.S1_at    |
| Hypothetical Protein      |                                | 2.6                   | 4.6                   | C28H8.3             | C28H8.3                          | MmugDNA.27193.1.S1_at   |
| Hypothetical Protein      |                                | 2.3                   | 2.4                   | CCDC58              | coiled-coil domain containin     | MmugDNA.24837.1.S1_s_at |
| Hypothetical Protein      |                                | 2.5                   | 2.2                   | CCDC99              | coiled-coil domain containin     | MmugDNA.303.1.S1_at     |
| Hypothetical Protein      |                                | 4.4                   | 5.7                   | DEPDC1B (LOC709670) | DEP domain containing 1B         | MmugDNA.28002.1.S1_at   |
| Hypothetical Protein      |                                | 4.1                   | 4.4                   | LOC695836           | hypothetical protein LOC69       | MmugDNA.2512.1.S1_at    |
| Hypothetical Protein      |                                | 3.1                   | 4.9                   | LOC708602           | thymidylate kinase family L      | MmugDNA.21336.1.S1_at   |
| Hypothetical Protein      |                                | 2.8                   | 3.4                   | LOC712570           | hypothetical protein LOC71       | MmugDNA.43588.1.S1_at   |
| Hypothetical Protein      |                                | 3.7                   | 3.4                   | LOC714686           | hypothetical protein LOC71       | MmugDNA.1969.1.S1_at    |
| Hypothetical Protein      |                                | 2.8                   | 2.7                   | LOC718812           | hypothetical protein LOC71       | MmugDNA.33404.1.S1_at   |
| Hypothetical Protein      |                                | 2.8                   | 2.5                   | LOC718812           | hypothetical protein LOC71       | MmuSTS.340.1.S1_at      |
| Hypothetical Protein      |                                | 2.0                   | 2.3                   | LOC713624           | hypothetical protein LOC71       | MmugDNA.26033.1.S1_at   |



| Classification       | Sub-Classification    | SM Fold Changes 14dpi | RM Fold Changes 14dpi | Gene Symbol               | Gene Title                     | Affymetrix ID           |
|----------------------|-----------------------|-----------------------|-----------------------|---------------------------|--------------------------------|-------------------------|
| Hypothetical Protein |                       | 2.7                   | 1.8                   | FLJ40869                  | hypothetical protein FLJ40869  | MmugDNA.31368.1.S1_at   |
| Hypothetical Protein |                       | 2.1                   | 2.0                   | LOC711569                 | hypothetical protein LOC711569 | MmugDNA.32941.1.S1_at   |
| Hypothetical Protein |                       | 2.0                   | 1.2                   | LOC711872                 | hypothetical protein LOC711872 | MmuSTS.4350.1.S1_at     |
| Hypothetical Protein |                       | 2.3                   | 1.3                   | LOC696907                 | hypothetical protein LOC696907 | MmugDNA.30940.1.S1_at   |
| Hypothetical Protein |                       | 2.2                   | 1.6                   | LOC700659                 | hypothetical protein LOC700659 | MmugDNA.35877.1.S1_s_at |
| Hypothetical Protein |                       | 2.4                   | 2.0                   | LOC714457                 | CG30497-PA, isoform A          | MmugDNA.28074.1.S1_at   |
| Hypothetical Protein |                       | 2.7                   | 2.0                   | <b>LOC715967</b>          | hypothetical protein LOC715967 | MmugDNA.23367.1.S1_s_at |
| Hypothetical Protein |                       | 2.6                   | 1.9                   | <b>LOC715967</b>          | hypothetical protein LOC715967 | MmugDNA.23367.1.S1_at   |
| Hypothetical Protein |                       | 1.9                   | 2.2                   | <b>LOC713624</b>          | hypothetical protein LOC713624 | MmugDNA.2320.1.S1_at    |
| Hypothetical Protein |                       | 1.0                   | 3.2                   | ---                       | ---                            | MmugDNA.26764.1.S1_at   |
| Hypothetical Protein |                       | 1.9                   | 4.2                   | ---                       | ---                            | MmugDNA.17680.1.S1_at   |
| Hypothetical Protein |                       | 1.1                   | 2.0                   | LOC717665                 | hypothetical protein LOC717665 | MmugDNA.3828.1.S1_at    |
| Hypothetical Protein |                       | 1.6                   | 2.3                   | C11orf82                  | Noxin                          | MmugDNA.3959.1.S1_at    |
| Hypothetical Protein |                       | 1.5                   | 2.5                   | C12orf48                  | C12orf48                       | MmugDNA.33807.1.S1_at   |
| Hypothetical Protein |                       | 1.1                   | 2.2                   | C1orf174                  | C1orf174                       | MmugDNA.25707.1.S1_at   |
| Hypothetical Protein |                       | 1.9                   | 2.5                   | C1orf31                   | C1orf31                        | MmugDNA.26763.1.S1_at   |
| Hypothetical Protein |                       | -1.3                  | 2.0                   | C20orf199                 | C20orf199                      | MmugDNA.23475.1.S1_s_at |
| Hypothetical Protein |                       | 1.2                   | 2.0                   | C21orf45                  | FASP1                          | MmugDNA.35383.1.S1_at   |
| Hypothetical Protein |                       | 1.3                   | 2.1                   | C3orf38                   | C3orf38                        | MmugDNA.40301.1.S1_at   |
| Hypothetical Protein |                       | 1.3                   | 2.0                   | LOC283951                 | No network object found        | MmugDNA.14392.1.S1_at   |
| Hypothetical Protein |                       | 1.4                   | 2.1                   | LOC695780                 | FAST kinase domain-contain     | MmugDNA.19959.1.S1_at   |
| Hypothetical Protein |                       | 1.4                   | 7.5                   | LOC696059                 | hypothetical protein LOC696059 | MmugDNA.24630.1.S1_s_at |
| Hypothetical Protein |                       | 1.4                   | 2.0                   | LOC701070                 | FAM111A                        | MmugDNA.35003.1.S1_at   |
| Hypothetical Protein |                       | 1.3                   | 2.6                   | LOC701729                 | hypothetical protein LOC701729 | MmugDNA.27586.1.S1_at   |
| Hypothetical Protein |                       | 1.7                   | 2.2                   | LOC704259                 | hypothetical protein LOC704259 | MmugDNA.35965.1.S1_at   |
| Hypothetical Protein |                       | 2.0                   | 2.2                   | LOC707481                 | Separase                       | MmugDNA.15260.1.S1_at   |
| Hypothetical Protein |                       | 1.4                   | 2.1                   | LOC714874                 | ETF complex *                  | MmugDNA.39133.1.S1_at   |
| Hypothetical Protein |                       | 1.4                   | 2.9                   | LOC717665                 | hypothetical protein LOC717665 | MmugDNA.28886.1.S1_at   |
| Hypothetical Protein |                       | 1.9                   | 2.4                   | MGC5370                   | No network object found        | MmugDNA.37694.1.S1_at   |
| Hypothetical Protein |                       | 1.8                   | 2.4                   | MRPL35                    | Large 39S subunit *            | MmugDNA.13781.1.S1_at   |
| Hypothetical Protein |                       | 1.5                   | 2.2                   | <b>TOMM5</b>              | C9orf105                       | MmugDNA.31006.1.S1_at   |
| Hypothetical Protein |                       | 1.5                   | 2.0                   | <b>TOMM5</b>              | C9orf105                       | MmugDNA.31006.1.S1_s_at |
| Hypothetical Protein |                       | 1.6                   | 2.9                   | WDR76                     | WDR76                          | MmugDNA.9449.1.S1_at    |
| Hypothetical Protein |                       | -2.0                  | -1.0                  | ---                       | Transcribed locus, strongly    | MmuAffx.23.12.S1_x_at   |
| Hypothetical Protein |                       | -2.4                  | 1.1                   | ---                       | Transcribed locus, strongly    | MmuAffx.23.21.S1_s_at   |
| Hypothetical Protein |                       | -2.0                  | 1.5                   | ---                       | ---                            | MmugDNA.24683.1.S1_at   |
| Hypothetical Protein |                       | -2.5                  | -1.1                  | ---                       | ---                            | MmugDNA.20647.1.S1_at   |
| Hypothetical Protein |                       | -2.5                  | 1.6                   | ---                       | ---                            | MmugDNA.12998.1.S1_at   |
| Hypothetical Protein |                       | -2.0                  | 1.1                   | LOC100130976              | No network object found        | MmugDNA.36815.1.S1_at   |
| Hypothetical Protein |                       | -2.0                  | 1.3                   | LOC711574                 | hypothetical protein LOC711574 | MmugDNA.13302.1.S1_at   |
| Hypothetical Protein |                       | -2.2                  | -1.6                  | MGC45871                  | hypothetical protein           | MmugDNA.12680.1.S1_at   |
| Hypothetical Protein |                       | -2.5                  | 1.2                   | LOC696781                 | hypothetical protein LOC696781 | MmugDNA.28007.1.S1_at   |
| Hypothetical Protein |                       | 1.1                   | -2.0                  | DKFZP434P211              | DKFZP434P211                   | MmugDNA.23655.1.S1_at   |
| Hypothetical Protein |                       | -1.1                  | -2.2                  | LOC285965                 | No network object found        | MmugDNA.30474.1.S1_at   |
| Hypothetical Protein |                       | 1.2                   | -2.3                  | LOC693403                 |                                | MmugDNA.11146.1.S1_at   |
| Hypothetical Protein |                       | 1.1                   | -2.7                  | LOC712553                 |                                | Mmu.15902.2.S1_at       |
| Hypothetical Protein |                       | 1.2                   | -2.5                  | LOC728904                 | No network object found        | MmugDNA.20697.1.S1_at   |
| Unknown              | Gene Function Unknown | 2.5                   | 2.7                   | ZNF367                    | zinc finger protein 367        | MmugDNA.40258.1.S1_at   |
| Unknown              | Gene Function Unknown | 2.5                   | 5.9                   | LOC574106                 | alpha-1-antichymotrypsin       | MmuSTS.2150.1.S1_at     |
| Unknown              | Gene Function Unknown | 2.5                   | 3.2                   | LOC699255                 | c-Mpl binding protein isoform  | MmugDNA.38020.1.S1_at   |
| Unknown              | Gene Function Unknown | 2.7                   | 2.9                   | FAM83D (LOC697925)        | Protein C20orf129              | MmugDNA.20671.1.S1_at   |
| Unknown              | Gene Function Unknown | 2.9                   | 2.7                   | <b>FAM54A (LOC705828)</b> | family with sequence similar   | MmugDNA.28821.1.S1_at   |
| Unknown              | Gene Function Unknown | 2.0                   | 1.6                   | <b>FAM54A (LOC705828)</b> | family with sequence similar   | MmugDNA.9831.1.S1_at    |
| Unknown              | Gene Function Unknown | 3.0                   | 3.7                   | ERCC6L                    | excision repair cross-compl    | MmugDNA.27885.1.S1_at   |
| Unknown              | Gene Function Unknown | 2.7                   | 2.5                   | <b>ANKRD22</b>            | ankyrin repeat domain 22       | MmugDNA.11765.1.S1_at   |
| Unknown              | Gene Function Unknown | 2.2                   | 1.9                   | <b>ANKRD22</b>            | ankyrin repeat domain 22       | MmugDNA.3988.1.S1_at    |
| Unknown              | Gene Function Unknown | 2.1                   | -1.1                  | ---                       | ---                            | Mmu.15443.1.S1_x_at     |
| Unknown              | Gene Function Unknown | 2.6                   | 1.4                   | FAM46C                    | family with sequence similar   | MmugDNA.3623.1.S1_at    |
| Unknown              | Gene Function Unknown | 1.6                   | 2.2                   | C18orf54                  | C18orf54                       | MmugDNA.12151.1.S1_at   |
| Unknown              | Gene Function Unknown | 1.2                   | 2.3                   | <b>CEP27</b>              | CEP27                          | MmugDNA.4248.1.S1_at    |
| Unknown              | Gene Function Unknown | 1.2                   | 2.3                   | <b>CEP27</b>              | CEP27                          | MmugDNA.4248.1.S1_at    |
| Unknown              | Gene Function Unknown | 1.0                   | 2.0                   | COQ4                      | COQ4                           | MmugDNA.26236.1.S1_at   |
| Unknown              | Gene Function Unknown | 1.4                   | 2.4                   | COX4NB                    | NOC4                           | MmugDNA.37901.1.S1_at   |
| Unknown              | Gene Function Unknown | -1.0                  | 2.9                   | CPEB4                     | cytoplasmic polyadenylation    | MmugDNA.32209.1.S1_at   |
| Unknown              | Gene Function Unknown | -1.2                  | 2.4                   | DBNDD2                    | DBNDD2                         | MmugDNA.629.1.S1_at     |
| Unknown              | Gene Function Unknown | 1.5                   | 2.4                   | FAM98B                    | FAM98B                         | MmugDNA.23710.1.S1_at   |
| Unknown              | Gene Function Unknown | 1.4                   | 2.4                   | GAS2L3                    | GAS2L3                         | MmugDNA.7107.1.S1_at    |
| Unknown              | Gene Function Unknown | 1.4                   | 2.2                   | GSTCD                     | GSTCD                          | MmugDNA.43572.1.S1_at   |
| Unknown              | Gene Function Unknown | 1.1                   | 2.1                   | GTPBP8                    | GTPBP8                         | MmugDNA.6122.1.S1_at    |
| Unknown              | Gene Function Unknown | 1.4                   | 2.1                   | HEBP2                     | HEBP2                          | MmugDNA.19999.1.S1_at   |
| Unknown              | Gene Function Unknown | 1.4                   | 2.2                   | KIAA1618                  | Protein ALO17                  | MmugDNA.1519.1.S1_at    |
| Unknown              | Gene Function Unknown | 1.7                   | 2.1                   | LOC699733                 |                                | Mmu.4098.1.S1_at        |
| Unknown              | Gene Function Unknown | 1.7                   | 2.7                   | LOC700208                 | epithelial stromal interaction | MmugDNA.15476.1.S1_at   |
| Unknown              | Gene Function Unknown | 1.5                   | 2.2                   | LOC701865                 |                                | Mmu.8286.1.S1_s_at      |
| Unknown              | Gene Function Unknown | 1.2                   | 2.0                   | LOC701891                 |                                | MmugDNA.22406.1.S1_at   |
| Unknown              | Gene Function Unknown | 1.6                   | 2.3                   | LOC701917                 |                                | Mmu.9683.1.S1_at        |
| Unknown              | Gene Function Unknown | 1.6                   | 2.9                   | LOC702520                 | defective in sister chromatid  | MmugDNA.19989.1.S1_at   |
| Unknown              | Gene Function Unknown | 1.4                   | 2.2                   | LOC714930                 |                                | Mmu.4737.1.S1_at        |
| Unknown              | Gene Function Unknown | 1.1                   | 2.3                   | LOC702789                 |                                | MmuSTS.1193.1.S1_at     |
| Unknown              | Gene Function Unknown | 1.5                   | 3.0                   | LOC703327                 | mesoderm specific transcrip    | MmugDNA.41111.1.S1_at   |
| Unknown              | Gene Function Unknown | -1.1                  | 2.0                   | LOC710770                 | KIAA1913                       | MmugDNA.19520.1.S1_at   |
| Unknown              | Gene Function Unknown | -1.1                  | 3.1                   | LOC713440                 | Normal mucosa of esophag       | MmugDNA.34136.1.S1_at   |
| Unknown              | Gene Function Unknown | 1.6                   | 2.1                   | PLAC8                     | PLAC8                          | MmugDNA.13757.1.S1_at   |
| Unknown              | Gene Function Unknown | 1.3                   | 2.2                   | PTPLAD2                   | Protein tyrosine phosphatas    | MmugDNA.17986.1.S1_s_at |
| Unknown              | Gene Function Unknown | 1.3                   | 2.0                   | RNF10                     | RNF10                          | MmugDNA.37275.1.S1_at   |
| Unknown              | Gene Function Unknown | -1.1                  | 2.3                   | RORA                      | ROR-alpha                      | MmugDNA.789.1.S1_at     |
| Unknown              | Gene Function Unknown | 1.2                   | 2.1                   | RPL26L1                   | 60S ribosomal protein L26-l    | MmugDNA.38117.1.S1_at   |

| Classification | Sub-Classification    | SM Fold Changes 14dpi | RM Fold Changes 14dpi | Gene Symbol          | Gene Title                                        | Affymetrix ID           |
|----------------|-----------------------|-----------------------|-----------------------|----------------------|---------------------------------------------------|-------------------------|
| Unknown        | Gene Function Unknown | 1.3                   | 3.2                   | RPL39L               | ---                                               | MmugDNA.27695.1.S1_at   |
| Unknown        | Gene Function Unknown | 1.8                   | 2.3                   | SCRN3                | SCRN3                                             | MmugDNA.895.1.S1_s_at   |
| Unknown        | Gene Function Unknown | 1.8                   | 2.0                   | SDF2L1               | SDF2L1                                            | MmugDNA.34901.1.S1_at   |
| Unknown        | Gene Function Unknown | -1.1                  | 2.2                   | SMCHD1               | Smchd1                                            | MmugDNA.14214.1.S1_at   |
| Unknown        | Gene Function Unknown | 1.4                   | 2.3                   | SNHG1                | No network object found                           | MmugDNA.6132.1.S1_at    |
| Unknown        | Gene Function Unknown | 1.2                   | 2.3                   | SNHG12               | C1orf79                                           | MmugDNA.33923.1.S1_at   |
| Unknown        | Gene Function Unknown | -1.4                  | 2.0                   | SSBP2                | SSBP2                                             | MmugDNA.30899.1.S1_at   |
| Unknown        | Gene Function Unknown | -1.4                  | 2.0                   | SVIP                 | SVIP                                              | MmugDNA.26191.1.S1_at   |
| Unknown        | Gene Function Unknown | 1.3                   | 2.1                   | TACC3                | TACC3                                             | MmugDNA.37541.1.S1_at   |
| Unknown        | Gene Function Unknown | 1.2                   | 2.2                   | TMEM126B             | TMEM126B                                          | MmugDNA.2767.1.S1_at    |
| Unknown        | Gene Function Unknown | 1.8                   | 2.0                   | XRCC6BP1             | XRCC6BP1                                          | MmugDNA.12823.1.S1_at   |
| Unknown        | Gene Function Unknown | 1.8                   | 2.1                   | XTP3TPA              | XTP3TPA                                           | MmugDNA.19997.1.S1_s_at |
| Unknown        | Gene Function Unknown | 1.0                   | 2.6                   | ZCCHC2               | ZCCHC2                                            | MmugDNA.28694.1.S1_at   |
| Unknown        | Gene Function Unknown | 1.2                   | 2.1                   | ZCCHC2               | ZCCHC2                                            | MmugDNA.28694.1.S1_s_at |
| Unknown        | Gene Function Unknown | -2.3                  | -2.2                  | ---                  | solute carrier family 26, member 1                | MmuSTS.4436.1.S1_at     |
| Unknown        | Gene Function Unknown | -2.2                  | -1.1                  | LOC701902            | ---                                               | Mmu.8061.1.S1_at        |
| Unknown        | Gene Function Unknown | 1.1                   | -2.1                  | C14orf53             | C14orf53                                          | MmugDNA.31592.1.S1_at   |
| Unknown        | Gene Function Unknown | -1.1                  | -2.3                  | CAMK1G               | CLICKIII                                          | MmugDNA.22719.1.S1_s_at |
| Unknown        | Gene Function Unknown | 1.2                   | -2.6                  | CCDC108              | CCDC108                                           | MmugDNA.35731.1.S1_a_at |
| Unknown        | Gene Function Unknown | 1.2                   | -2.2                  | FHAD1                | forkhead-associated (FHA) domain containing 1     | MmugDNA.13222.1.S1_s_at |
| Unknown        | Gene Function Unknown | 1.1                   | -2.2                  | LOC701581            | ---                                               | MmunewRS.301.1.S1_a_at  |
| Unknown        | Gene Function Unknown | 1.2                   | -2.6                  | LOC701581            | ---                                               | MmunewRS.301.1.S1_at    |
| Unknown        | Gene Function Unknown | 1.1                   | -2.1                  | TACC1                | TACC1                                             | MmugDNA.40005.1.S1_at   |
| Unknown        | Gene Function Unknown | 2.3                   | 1.8                   | C14ORF106            | chromosome 14 open reading frame 106              | MmugDNA.5761.1.S1_at    |
| Unknown        | Gene Function Unknown | 1.9                   | 2.3                   | C14ORF106            | M18BP1                                            | MmugDNA.6067.1.S1_at    |
| Unknown        | Gene Function Unknown | 4.0                   | 3.7                   | ---                  | ---                                               | MmuSTS.4748.1.S1_at     |
| Unknown        | Gene Function Unknown | 3.7                   | 6.1                   | ---                  | ---                                               | MmuSTS.1531.1.S1_at     |
| Unknown        | Gene Function Unknown | 3.1                   | 2.9                   | ---                  | ---                                               | MmuSTS.1534.1.S1_at     |
| Unknown        | Gene Function Unknown | 3.5                   | 7.2                   | C18ORF24             | chromosome 18 open reading frame 24               | MmugDNA.39863.1.S1_at   |
| Unknown        | Gene Function Unknown | 2.6                   | 3.6                   | CHAC2                | ChaC, cation transport regulator 2                | MmugDNA.66.1.S1_at      |
| Unknown        | Gene Function Unknown | 3.0                   | 2.1                   | DEPDC1 (LOC701888)   | DEP domain containing 1a                          | MmugDNA.29315.1.S1_at   |
| Unknown        | Gene Function Unknown | 2.1                   | 3.7                   | DEPDC1 (LOC701888)   | DEP domain containing 1a                          | MmugDNA.40906.1.S1_at   |
| Unknown        | Gene Function Unknown | 2.2                   | 3.6                   | FLJ10292 (LOC717824) | mago-nashi homolog                                | MmugDNA.4402.1.S1_s_at  |
| Unknown        | Gene Function Unknown | 2.1                   | 2.1                   | LOC697934            | Protein KIAA0152 precursor                        | MmugDNA.4669.1.S1_at    |
| Unknown        | Gene Function Unknown | 2.2                   | 2.8                   | LOC715676            | ---                                               | Mmu.12263.1.S1_at       |
| Unknown        | Gene Function Unknown | 2.2                   | 1.8                   | ---                  | ???                                               | MmugDNA.2759.1.S1_at    |
| Unknown        | Gene Function Unknown | 2.2                   | 1.7                   | ---                  | ???                                               | Mmu.2276.1.S1_at        |
| Unknown        | Gene Function Unknown | 3.5                   | 1.3                   | ---                  | ---                                               | Mmu.15507.1.S1_x_at     |
| Unknown        | Gene Function Unknown | 2.1                   | 1.5                   | LOC700859            | CG11699-PA (chromosome 14 open reading frame 106) | MmugDNA.31089.1.S1_s_at |
| Unknown        | Gene Function Unknown | 2.4                   | 1.9                   | LOC704099            | CG6597-PA, isoform A (delta)                      | MmugDNA.5478.1.S1_at    |
| Unknown        | Gene Function Unknown | 1.9                   | 2.5                   | ---                  | ???                                               | MmugDNA.1253.1.S1_at    |
| Unknown        | Gene Function Unknown | -1.2                  | 2.7                   | ---                  | ???                                               | MmugDNA.43397.1.S1_at   |
| Unknown        | Gene Function Unknown | -1.1                  | 2.2                   | ---                  | Protein KIAA0143                                  | Mmu.586.1.S1_at         |
| Unknown        | Gene Function Unknown | -1.0                  | 4.3                   | ---                  | Protein KIAA0143                                  | Mmu.586.2.S1_at         |
| Unknown        | Gene Function Unknown | -1.3                  | 2.5                   | ---                  | ???                                               | MmuAffx.78.1.S1_s_at    |
| Unknown        | Gene Function Unknown | 1.1                   | 2.0                   | ---                  | ---                                               | MmuSTS.1833.1.S1_at     |
| Unknown        | Gene Function Unknown | 1.4                   | 2.0                   | ---                  | ---                                               | Mmu.6730.1.S1_at        |
| Unknown        | Gene Function Unknown | 1.4                   | 2.0                   | LOC708475            | ---                                               | MmuSTS.961.1.S1_at      |
| Unknown        | Gene Function Unknown | 1.0                   | 2.0                   | LOC712882            | ---                                               | MmugDNA.1074.1.S1_at    |
| Unknown        | Gene Function Unknown | 1.8                   | 2.1                   | LOC712882            | ---                                               | MmuSTS.1683.1.S1_at     |
| Unknown        | Gene Function Unknown | 1.1                   | 2.0                   | LOC709637            | ---                                               | MmugDNA.37112.1.S1_at   |
| Unknown        | Gene Function Unknown | 1.1                   | 2.0                   | ---                  | ---                                               | MmugDNA.5668.1.S1_at    |
| Unknown        | Gene Function Unknown | 1.4                   | 2.0                   | ---                  | ---                                               | MmunewRS.252.1.S1_at    |
| Unknown        | Gene Function Unknown | 1.4                   | 2.0                   | LOC698461            | ---                                               | MmuSTS.3695.1.S1_at     |
| Unknown        | Gene Function Unknown | -1.0                  | 2.0                   | LOC696653            | ---                                               | MmuSTS.68.1.S1_at       |
| Unknown        | Gene Function Unknown | 1.3                   | 2.0                   | ---                  | ---                                               | MmugDNA.10466.1.S1_at   |
| Unknown        | Gene Function Unknown | 1.5                   | 2.0                   | LOC715437            | ---                                               | MmugDNA.5796.1.S1_s_at  |
| Unknown        | Gene Function Unknown | 1.2                   | 2.0                   | LOC719004            | ---                                               | MmuSTS.958.1.S1_at      |
| Unknown        | Gene Function Unknown | -1.1                  | 2.0                   | C8orf31              | No network object found                           | MmugDNA.27925.1.S1_at   |
| Unknown        | Gene Function Unknown | 1.9                   | 2.0                   | C13orf3              | C13orf3                                           | MmugDNA.23023.1.S1_at   |
| Unknown        | Gene Function Unknown | 1.4                   | 2.0                   | LOC714828            | ---                                               | MmuSTS.2341.1.S1_at     |
| Unknown        | Gene Function Unknown | 1.5                   | 2.0                   | ---                  | ---                                               | MmugDNA.393.1.S1_at     |
| Unknown        | Gene Function Unknown | -1.2                  | 2.0                   | ---                  | ---                                               | MmugDNA.38123.1.S1_at   |
| Unknown        | Gene Function Unknown | 1.4                   | 2.0                   | ---                  | ---                                               | MmugDNA.39220.1.S1_at   |
| Unknown        | Gene Function Unknown | 1.6                   | 2.1                   | LOC714844            | ---                                               | Mmu.15592.2.S1_at       |
| Unknown        | Gene Function Unknown | 1.8                   | 2.1                   | ---                  | ---                                               | MmuSTS.1595.1.S1_at     |
| Unknown        | Gene Function Unknown | -1.2                  | 2.1                   | KIAA1310             | FLJ10081                                          | MmugDNA.34387.1.S1_at   |
| Unknown        | Gene Function Unknown | 1.5                   | 2.1                   | LOC719808            | ---                                               | MmuSTS.4399.1.S1_at     |
| Unknown        | Gene Function Unknown | 1.0                   | 2.1                   | ---                  | ---                                               | MmugDNA.17162.1.S1_at   |
| Unknown        | Gene Function Unknown | 1.8                   | 2.1                   | LOC697698            | ---                                               | MmuSTS.713.1.S1_at      |
| Unknown        | Gene Function Unknown | 1.1                   | 2.1                   | ---                  | ---                                               | MmugDNA.29255.1.S1_at   |
| Unknown        | Gene Function Unknown | 1.6                   | 2.1                   | ---                  | ---                                               | Mmu.7716.1.S1_at        |
| Unknown        | Gene Function Unknown | 2.0                   | 2.1                   | LOC707321            | ---                                               | MmuSTS.2151.1.S1_at     |
| Unknown        | Gene Function Unknown | 1.3                   | 2.1                   | ---                  | ---                                               | MmugDNA.24318.1.S1_at   |
| Unknown        | Gene Function Unknown | 1.7                   | 2.1                   | LOC695971            | ---                                               | MmuSTS.1377.1.S1_at     |
| Unknown        | Gene Function Unknown | 1.0                   | 2.1                   | ---                  | ---                                               | MmugDNA.9710.1.S1_at    |
| Unknown        | Gene Function Unknown | -1.5                  | 2.1                   | ---                  | ---                                               | Mmu.8273.1.S1_at        |
| Unknown        | Gene Function Unknown | 1.2                   | 2.1                   | LOC710680            | ---                                               | MmugDNA.20706.1.S1_at   |
| Unknown        | Gene Function Unknown | 1.7                   | 2.1                   | LOC698482            | ---                                               | MmuSTS.2698.1.S1_x_at   |
| Unknown        | Gene Function Unknown | 1.1                   | 2.1                   | ---                  | ---                                               | MmuMitochon.13.1.S1_at  |
| Unknown        | Gene Function Unknown | 1.0                   | 2.1                   | ---                  | ---                                               | MmugDNA.9815.1.S1_at    |
| Unknown        | Gene Function Unknown | 1.7                   | 2.1                   | LOC709326            | ---                                               | MmuSTS.54.1.S1_at       |
| Unknown        | Gene Function Unknown | 1.7                   | 2.2                   | LOC709326            | ---                                               | MmuSTS.54.1.S1_s_at     |
| Unknown        | Gene Function Unknown | 1.3                   | 2.1                   | LOC714217            | ---                                               | Mmu.3556.1.S1_s_at      |
| Unknown        | Gene Function Unknown | 1.9                   | 2.1                   | ---                  | ---                                               | Mmu.11863.1.S1_at       |
| Unknown        | Gene Function Unknown | -1.2                  | 2.1                   | ---                  | ---                                               | Mmu.1819.1.S1_at        |
| Unknown        | Gene Function Unknown | 1.2                   | 2.1                   | LOC719260            | ---                                               | Mmu.10556.1.S1_s_at     |

| Classification | Sub-Classification | SM Fold Changes 14dpi | RM Fold Changes 14dpi | Gene Symbol | Gene Title               | Affymetrix ID            |
|----------------|--------------------|-----------------------|-----------------------|-------------|--------------------------|--------------------------|
| Unknown        |                    | -1.7                  | 2.1                   | LOC707432   |                          | MmuSTS.1462.1.S1_at      |
| Unknown        |                    | 1.0                   | 2.2                   | ---         |                          | MmugDNA.1781.1.S1_at     |
| Unknown        |                    | 1.9                   | 2.2                   | LOC715866   |                          | MmuSTS.2830.1.S1_at      |
| Unknown        |                    | -2.4                  | 2.2                   | ---         |                          | MmugDNA.23105.1.S1_at    |
| Unknown        |                    | 1.4                   | 2.2                   | LOC711746   |                          | MmuSTS.2023.1.S1_at      |
| Unknown        |                    | -1.0                  | 2.2                   | ---         |                          | MmugDNA.32814.1.S1_at    |
| Unknown        |                    | 1.0                   | 2.2                   | ---         |                          | MmugDNA.14777.1.S1_at    |
| Unknown        |                    | 1.8                   | 2.2                   | LOC718376   |                          | MmuSTS.4765.1.S1_at      |
| Unknown        |                    | -1.4                  | 2.2                   | ---         |                          | Mmu.3044.12.S1_s_at      |
| Unknown        |                    | 1.9                   | 2.2                   | LOC713130   |                          | Mmu.11204.1.S1_s_at      |
| Unknown        |                    | 1.7                   | 2.2                   | LOC719092   |                          | Mmu.11584.1.S1_at        |
| Unknown        |                    | 1.0                   | 2.2                   | ---         |                          | MmugDNA.7666.1.S1_at     |
| Unknown        |                    | 1.1                   | 2.2                   | LOC713715   |                          | MmuSTS.3349.1.S1_at      |
| Unknown        |                    | 1.3                   | 2.2                   | ---         |                          | MmugDNA.20683.1.S1_at    |
| Unknown        |                    | 1.1                   | 2.2                   | LOC714885   |                          | MmugDNA.43317.1.S1_at    |
| Unknown        |                    | -1.3                  | 2.2                   | LOC713696   |                          | MmuSTS.2193.1.S1_at      |
| Unknown        |                    | -1.2                  | 2.2                   | LOC712754   |                          | MmuSTS.3131.1.S1_at      |
| Unknown        |                    | 1.4                   | 2.2                   | ---         |                          | Mmu.10692.1.A1_at        |
| Unknown        |                    | 1.7                   | 2.3                   | ---         |                          | MmuSTS.4533.1.S1_at      |
| Unknown        |                    | 1.7                   | 2.3                   | LILRAE      |                          | MmugDNA.20252.1.S1_x_at  |
| Unknown        |                    | 1.4                   | 2.3                   | ---         |                          | MmugDNA.9429.1.S1_at     |
| Unknown        |                    | 1.6                   | 2.3                   | MRPL36      | Large 39S subunit *      | MmugDNA.33607.1.S1_at    |
| Unknown        |                    | -1.0                  | 2.3                   | LOC697232   |                          | MmuSTS.109.1.S1_at       |
| Unknown        |                    | 2.0                   | 2.3                   | LYAR        | LYAR                     | MmugDNA.22734.1.S1_at    |
| Unknown        |                    | 1.7                   | 2.3                   | LOC705690   |                          | MmugDNA.7284.1.S1_at     |
| Unknown        |                    | 1.5                   | 2.3                   | LOC709186   |                          | MmuSTS.597.1.S1_s_at     |
| Unknown        |                    | -1.1                  | 2.3                   | ---         |                          | MmugDNA.39324.1.S1_at    |
| Unknown        |                    | 1.8                   | 2.3                   | LOC696519   |                          | MmuSTS.2135.1.S1_at      |
| Unknown        |                    | 1.8                   | 2.3                   | LOC697028   |                          | MmunewRS.881.1.S1_at     |
| Unknown        |                    | 1.9                   | 2.3                   | LOC695933   |                          | MmuSTS.55.1.S1_at        |
| Unknown        |                    | 1.7                   | 2.3                   | LOC695933   |                          | Mmu.7027.1.S1_at         |
| Unknown        |                    | 1.1                   | 2.3                   | ---         |                          | MmuSTS.3531.1.S1_at      |
| Unknown        |                    | -1.1                  | 2.3                   | Mmu.1314.2  |                          | Mmu.1314.2.S1_a_at       |
| Unknown        |                    | 1.4                   | 2.3                   | LOC706022   |                          | MmugDNA.5960.1.S1_at     |
| Unknown        |                    | 1.4                   | 2.3                   | ---         |                          | MmuSTS.1253.1.S1_at      |
| Unknown        |                    | 1.1                   | 2.3                   | LOC713563   |                          | MmuSTS.3453.1.S1_at      |
| Unknown        |                    | 1.2                   | 2.3                   | ---         |                          | MmugDNA.20633.1.S1_at    |
| Unknown        |                    | 1.4                   | 2.4                   | ---         |                          | MmuSTS.3999.1.S1_at      |
| Unknown        |                    | 1.8                   | 2.4                   | ---         |                          | MmuSTS.173.1.S1_at       |
| Unknown        |                    | 1.8                   | 2.4                   | ---         |                          | MmugDNA.43203.1.S1_at    |
| Unknown        |                    | 2.0                   | 2.4                   | LOC716218   |                          | MmuSTS.3922.1.S1_at      |
| Unknown        |                    | 1.0                   | 2.4                   | ---         |                          | MmuSTS.874.1.S1_at       |
| Unknown        |                    | 1.3                   | 2.5                   | LOC696142   |                          | Mmu.5234.1.S1_at         |
| Unknown        |                    | 1.2                   | 2.5                   | LOC707233   |                          | Mmu.11739.1.S1_at        |
| Unknown        |                    | 1.0                   | 2.5                   | LOC712288   |                          | MmuSTS.849.1.S1_at       |
| Unknown        |                    | -1.6                  | 2.5                   | ---         |                          | Mmu.15402.1.A1_at        |
| Unknown        |                    | -1.4                  | 2.5                   | ---         |                          | MmugDNA.31642.1.S1_at    |
| Unknown        |                    | 1.3                   | 2.5                   | ---         |                          | MmugDNA.31145.1.S1_at    |
| Unknown        |                    | 1.1                   | 2.6                   | LOC706698   |                          | Mmu.5288.1.S1_at         |
| Unknown        |                    | 1.1                   | 2.6                   | LOC715638   |                          | MmuSTS.602.1.S1_at       |
| Unknown        |                    | 1.2                   | 2.7                   | LOC713150   |                          | Mmu.8081.1.S1_x_at       |
| Unknown        |                    | 1.0                   | 2.7                   | LOC718942   |                          | MmunewRS.154.1.S1_s_at   |
| Unknown        |                    | 1.0                   | 2.8                   | ---         |                          | MmugDNA.12088.1.S1_at    |
| Unknown        |                    | -1.3                  | 2.8                   | ---         |                          | MmugDNA.39778.1.S1_at    |
| Unknown        |                    | -1.3                  | 2.9                   | ---         |                          | MmugDNA.15061.1.S1_at    |
| Unknown        |                    | 1.3                   | 3.0                   | LOC696253   |                          | MmunewRS.661.1.S1_at     |
| Unknown        |                    | 2.0                   | 3.1                   | ---         |                          | MmugDNA.34912.1.S1_at    |
| Unknown        |                    | 1.5                   | 3.1                   | ---         |                          | MmuAfx.23.16.S1_s_at     |
| Unknown        |                    | -1.1                  | 3.1                   | ---         |                          | Mmu.2120.1.A1_at         |
| Unknown        |                    | 1.3                   | 3.4                   | ---         |                          | MmugDNA.22699.1.S1_at    |
| Unknown        |                    | 1.4                   | 3.9                   | ---         |                          | Mmu.3117.1.S1_at         |
| Unknown        |                    | -1.4                  | 4.3                   | ---         |                          | Mmu.12003.1.S1_s_at      |
| Unknown        |                    | -1.1                  | 4.9                   | ---         |                          | MmuMitochon.6.1.S1_s_at  |
| Unknown        |                    | -1.0                  | 7.1                   | ---         |                          | Mmu.10209.2.S1_at        |
| Unknown        |                    | 1.1                   | 10.3                  | ---         |                          | MmuMitochon.3.1.S1_s_at  |
| Unknown        |                    | 1.2                   | 11.8                  | ---         |                          | MmuMitochon.10.1.S1_s_at |
| Unknown        |                    | -2.3                  | 1.0                   | ---         |                          | MmugDNA.21478.1.S1_at    |
| Unknown        |                    | -2.6                  | -1.1                  | ---         |                          | MmugDNA.11704.1.S1_at    |
| Unknown        |                    | -2.1                  | 1.7                   | ---         | Transcribed locus        | Mmu.12981.1.S1_s_at      |
| Unknown        |                    | -2.1                  | -1.1                  | ---         | ---                      | MmugDNA.2555.1.S1_at     |
| Unknown        |                    | -2.3                  | -1.3                  | ---         | ---                      | MmuSTS.4146.1.S1_at      |
| Unknown        |                    | -2.3                  | 1.1                   | ---         | ---                      | MmugDNA.36051.1.S1_at    |
| Unknown        |                    | -2.0                  | -1.2                  | LOC709116   | Probable ATP-dependent h | MmugDNA.37035.1.S1_at    |
| Unknown        |                    | -1.1                  | -24.6                 | ---         | ---                      | Mmu.5392.1.S1_at         |
| Unknown        |                    | -1.1                  | -5.5                  | LOC708902   | ---                      | MmuSTS.2297.1.S1_at      |
| Unknown        |                    | 1.1                   | -3.1                  | LOC721825   | ---                      | MmunewRS.138.1.S1_at     |
| Unknown        |                    | 1.1                   | -2.2                  | LOC721825   | ---                      | MmunewRS.138.1.S1_s_at   |
| Unknown        |                    | 1.1                   | -2.9                  | ---         | ---                      | MmugDNA.31864.1.S1_at    |
| Unknown        |                    | 1.1                   | -2.9                  | ---         | ---                      | Mmu.6835.1.S1_at         |
| Unknown        |                    | 1.1                   | -2.9                  | ---         | ---                      | MmugDNA.31864.1.S1_x_at  |
| Unknown        |                    | 1.4                   | -2.5                  | LOC697303   | Immunoglobulin omega cha | MmugDNA.23432.1.S1_at    |
| Unknown        |                    | 1.1                   | -2.5                  | ---         | ---                      | MmugDNA.7727.1.S1_at     |
| Unknown        |                    | -1.1                  | -2.4                  | ---         | ---                      | MmugDNA.4213.1.S1_at     |
| Unknown        |                    | 1.1                   | -2.3                  | LOC715289   | ---                      | MmugDNA.29979.1.A1_at    |
| Unknown        |                    | 1.1                   | -2.3                  | ---         | ---                      | MmugDNA.21052.1.S1_at    |
| Unknown        |                    | 1.2                   | -2.3                  | ---         | ---                      | MmuSTS.1866.1.S1_at      |
| Unknown        |                    | 1.2                   | -2.3                  | ---         | ---                      | MmuAfx.259.1.A1_at       |



| Classification | Sub-Classification | SM Fold Changes 14dpi | RM Fold Canges 14dpi | Gene Symbol | Gene Title | Affymetrix ID           |
|----------------|--------------------|-----------------------|----------------------|-------------|------------|-------------------------|
| Unknown        |                    | -1.1                  | -2.3                 | ---         |            | Mmu.4119.3.S1_at        |
| Unknown        |                    | 1.1                   | -2.3                 | ---         |            | MmugDNA.15844.1.S1_at   |
| Unknown        |                    | 1.0                   | -2.2                 | ---         |            | MmunewRS.296.1.S1_at    |
| Unknown        |                    | 1.0                   | -2.2                 | ---         |            | MmugDNA.43046.1.S1_at   |
| Unknown        |                    | 1.1                   | -2.1                 | ---         |            | MmugDNA.20526.1.S1_at   |
| Unknown        |                    | 1.1                   | -2.1                 | ---         |            | MmugDNA.28701.1.S1_at   |
| Unknown        |                    | -1.0                  | -2.1                 | ---         |            | MmugDNA.30494.1.S1_at   |
| Unknown        |                    | 1.3                   | -2.1                 | ---         |            | MmugDNA.26390.1.S1_x_at |
| Unknown        |                    | 1.0                   | -2.1                 | LOC716322   |            | MmugDNA.31119.1.S1_at   |
| Unknown        |                    | 1.1                   | -2.1                 | ---         |            | Mmu.1367.1.S1_at        |
| Unknown        |                    | 1.0                   | -2.1                 | FLJ42875    | FLJ42875   | MmugDNA.8763.1.S1_at    |
| Unknown        |                    | -1.0                  | -2.1                 | ---         |            | MmugDNA.12100.1.S1_at   |
| Unknown        |                    | -1.2                  | -2.1                 | ---         |            | MmuSTS.2916.1.S1_at     |
| Unknown        |                    | 1.0                   | -2.0                 | LOC697110   |            | MmugDNA.24580.1.S1_at   |
| Unknown        |                    | 1.1                   | -2.0                 | ---         |            | MmugDNA.28093.1.S1_at   |
| Unknown        |                    | 1.1                   | -2.0                 | ---         |            | MmugDNA.34236.1.S1_at   |

**Supplemental Table S8. Gene expression induced in SM LNs by SIVsmm infection.**

Fold changes at 14 dpi and 30 dpi SMs arranged by functional categories. Red indicates significantly increased expression, green significantly decreased expression, and black, not significantly altered in expression from base line by the criteria of  $\geq 2$ -fold change or Wilcoxon signed-rank test,  $P < 0.05$ .

| Classification                       | Sub-Classification | SM Fold Changes 14 dpi | SM Fold Changes 30 dpi | Gene Symbol                | Gene Name                   | Affymetrix ID           |
|--------------------------------------|--------------------|------------------------|------------------------|----------------------------|-----------------------------|-------------------------|
|                                      |                    | 2.5                    | 2.2                    | BIRC5 (SURVIVIN)           | Baculoviral IAP repeat-c    | MmuSTS.1955.1.S1_at     |
| Apoptosis                            | Anti-Apoptosis     | -1.0                   | 2.3                    | PTTG1                      | Securin (Pituitary tumor-1) | MmugDNA.11903.1.S1_at   |
| Apoptosis                            | Anti-Apoptosis     | 3.6                    | 3.5                    | PTTG1                      | Securin (Pituitary tumor-1) | MmugDNA.31059.1.S1_s_at |
| Apoptosis                            | Anti-Apoptosis     | 3.0                    | 3.7                    | PTTG1                      | Securin (Pituitary tumor-1) | MmugDNA.31059.1.S1_at   |
| Apoptosis                            | Anti-Apoptosis     | 4.2                    | 1.8                    | IFI-6-16                   | putative 6-16 protein       | MmuSTS.4428.1.S1_at     |
| Apoptosis                            | Pro-apoptotic      | 2.3                    | 1.8                    | BRI3BP                     | BRI3-binding protein        | MmuSTS.560.1.S1_at      |
| Apoptosis                            | Pro-apoptotic      | 2.3                    | 1.5                    | CYCS                       | cytochrome c                | MmugDNA.31771.1.S1_s_at |
| Apoptosis                            | Pro-apoptotic      | 2.4                    | 1.6                    | CYCS                       | cytochrome c                | Mmu.4398.1.S1_s_at      |
| Apoptosis                            | Pro-apoptotic      | 2.3                    | 1.6                    | CYCS                       | cytochrome c                | MmugDNA.31771.1.S1_at   |
| Apoptosis                            | Pro-apoptotic      | 2.0                    | 1.5                    | IKIP                       | IKK interacting protein iso | MmugDNA.13217.1.S1_at   |
| Apoptosis                            | Pro-apoptotic      | 3.3                    | 1.2                    | PACAP                      | Proapoptotic caspase ad     | MmugDNA.22076.1.S1_at   |
| Apoptosis                            | Pro-apoptotic      | 2.9                    | 1.3                    | PACAP                      | Proapoptotic caspase ad     | MmugDNA.12895.1.S1_s_at |
| Apoptosis                            | Anti-Apoptosis     | 2.3                    | 1.4                    | XAF1                       | XIAP associated factor-1    | MmugDNA.33861.1.S1_at   |
| Apoptosis                            | Pro-apoptotic      | 2.1                    | 2.5                    | ITGB3BP                    | NRIF3                       | MmugDNA.16765.1.S1_at   |
| Apoptosis                            | Pro-apoptotic      | -1.3                   | -2.2                   | STK4                       | serine/threonine kinase 4   | MmugDNA.25722.1.S1_at   |
| Apoptosis                            | Pro-apoptotic      | -1.3                   | -2.0                   | TNFSF10                    | tumor necrosis factor (lig  | MmugDNA.30129.1.S1_at   |
| Apoptosis                            | Pro-apoptotic      | -3.6                   | -4.8                   | NR4A1                      | nuclear receptor subfam1    | MmugDNA.18685.1.S1_at   |
| Apoptosis                            | Pro-apoptotic      | -2.2                   | -2.0                   | TNFRSF25                   | tumor necrosis factor rec   | MmugDNA.10013.1.S1_s_at |
| Apoptosis                            | Pro-apoptotic      | -2.1                   | -1.7                   | TNFRSF25                   | tumor necrosis factor rec   | MmugDNA.5862.1.S1_s_at  |
| Apoptosis                            | Pro-apoptotic      | -2.2                   | -1.3                   | TIAM1                      | T-cell lymphoma invasio     | MmugDNA.20387.1.S1_at   |
| B Cell Proliferation/Differentiation | Ig Related         | 4.5                    | 2.8                    | IGH chain complementarity  | Ig heavy chain compleme     | MmuAffx.225.1.S1_at     |
| B Cell Proliferation/Differentiation | Ig Related         | 3.8                    | 4.9                    | IGHG1                      | Ig heavy chain V-I region   | MmugDNA.15990.1.S1_s_at |
| B Cell Proliferation/Differentiation | Ig Related         | 2.9                    | 2.4                    | IGKV1-5                    | Ig kappa chain V-I region   | MmugDNA.27721.1.S1_x_at |
| B Cell Proliferation/Differentiation | Ig Related         | 2.2                    | 2.0                    | IGKV1-5                    | Ig kappa chain V-I region   | MmugDNA.16712.1.S1_at   |
| B Cell Proliferation/Differentiation | Ig Related         | 2.4                    | 2.2                    | IGKV1-5                    | Ig kappa chain V-I region   | MmugDNA.41766.1.S1_at   |
| B Cell Proliferation/Differentiation | Ig Related         | 4.1                    | 1.6                    | Ig kappa chain V-II region | Ig kappa chain V-II regio   | Mmu.9614.1.S1_at        |
| B Cell Proliferation/Differentiation | Ig Related         | 5.4                    | 2.4                    | Ig kappa chain V-II region | Ig kappa chain V-II regio   | MmugDNA.3445.1.S1_at    |
| B Cell Proliferation/Differentiation | Ig Related         | 2.9                    | 1.7                    | Ig kappa chain V-II region | Ig kappa chain V-II regio   | MmugDNA.41808.1.S1_at   |
| B Cell Proliferation/Differentiation | Ig Related         | 3.3                    | 1.1                    | IGHV                       | Ig heavy chain V-III regio  | Mmu.12915.1.S1_at       |
| B Cell Proliferation/Differentiation | Ig Related         | 3.8                    | 1.8                    | IGKC                       | Ig rearranged light chain   | Mmu.2571.1.S1_at        |
| B Cell Proliferation/Differentiation | Ig Related         | 2.9                    | 1.7                    | IGKC                       | Ig kappa chain V-I region   | MmugDNA.39296.1.S1_at   |
| B Cell Proliferation/Differentiation | Ig Related         | 3.3                    | 2.3                    | IGKV                       | Immunoglobulin kappa lig    | MmugDNA.27721.1.S1_at   |
| B Cell Proliferation/Differentiation | Ig Related         | 2.6                    | 2.2                    | IGKV                       | Immunoglobulin kappa lig    | MmugDNA.37783.1.S1_x_at |
| B Cell Proliferation/Differentiation | Ig Related         | 2.6                    | 1.7                    | LOC701504                  | Ig kappa chain V-III regio  | MmugDNA.31268.1.S1_at   |
| B Cell Proliferation/Differentiation | Ig Related         | 3.3                    | 1.7                    | LOC706650                  | Ig J chain                  | MmunewRS.816.1.S1_s_at  |
| B Cell Proliferation/Differentiation | Ig Related         | -1.8                   | -2.5                   | IGLC2                      | Immunoglobulin lambda       | MmugDNA.11907.1.S1_s_at |
| B Cell Proliferation/Differentiation | Ig Related         | -2.3                   | -2.7                   | IGLC2                      | Ig lambda chain V-I regio   | MmugDNA.10412.1.S1_x_at |
| B Cell Proliferation/Differentiation | Ig Related         | -2.3                   | -2.4                   | IGLC2                      | Ig lambda chain V-I regio   | MmugDNA.10412.1.S1_at   |
| B Cell Proliferation/Differentiation |                    | 2.1                    | 2.1                    | POU2AF1                    | ---                         | MmugDNA.21562.1.S1_at   |
| B Cell Proliferation/Differentiation |                    | 2.7                    | 7.2                    | AICDA                      | activation-induced cytidin  | MmugDNA.40365.1.S1_at   |
| B Cell Proliferation/Differentiation |                    | 1.9                    | 2.2                    | BANK1                      | B-cell scaffold protein wi  | MmuSTS.547.1.S1_at      |
| B Cell Proliferation/Differentiation |                    | 1.5                    | 2.6                    | LRMP                       | lymphoid-restricted mem     | MmuSTS.4537.1.S1_at     |
| Chemokine Receptors and Ligands      |                    | 5.2                    | 1.9                    | CXCL10 (IP-10)             | chemokine (C-X-C motif)     | Mmu.11363.1.S1_at       |
| Chemokine Receptors and Ligands      |                    | 6.6                    | 2.4                    | CXCL10 (IP-10)             | chemokine (C-X-C motif)     | MmuSTS.1893.1.S1_s_at   |
| Chemokine Receptors and Ligands      |                    | 7.7                    | 2.0                    | CXCL11 (IP-9I-TAC)         | chemokine (C-X-C motif)     | MmugDNA.15618.1.S1_s_at |
| Chemokine Receptors and Ligands      |                    | 7.2                    | 1.8                    | CXCL11 (IP-9I-TAC)         | chemokine (C-X-C motif)     | Mmu.11366.1.S1_at       |
| Chemokine Receptors and Ligands      |                    | 4.7                    | 1.7                    | CXCL11 (IP-9I-TAC)         | chemokine (C-X-C motif)     | MmugDNA.19126.1.S1_at   |
| Chemokine Receptors and Ligands      |                    | 3.9                    | 1.8                    | CCL20 (MIP3A)              | chemokine (C-C motif) lig   | MmuSTS.1416.1.S1_at     |
| Chemokine Receptors and Ligands      |                    | 3.6                    | 1.5                    | CCL20 (MIP3A)              | chemokine (C-C motif) lig   | Mmu.5186.1.S1_at        |
| Chemokine Receptors and Ligands      |                    | 3.5                    | 1.0                    | CXCL9 (MIG)                | chemokine (C-X-C motif)     | Mmu.11358.1.S1_at       |
| Chemokine Receptors and Ligands      |                    | 4.9                    | 1.7                    | CXCL9 (MIG)                | chemokine (C-X-C motif)     | MmuSTS.4003.1.S1_at     |
| Chemokine Receptors and Ligands      |                    | 2.4                    | 1.4                    | XCL1                       | chemokine (C motif) ligar   | MmugDNA.2039.1.S1_s_at  |
| Chemokine Receptors and Ligands      |                    | -1.8                   | -2.3                   | CCL21                      | chemokine (C-C motif) lig   | MmuSTS.3567.1.S1_at     |
| Chemokine Receptors and Ligands      |                    | -2.9                   | -2.8                   | CXCL12 (SDF-1)             | chemokine (C-X-C motif)     | Mmu.6455.1.S1_at        |
| Chemokine Receptors and Ligands      |                    | -2.1                   | -1.7                   | CCL22 (MDC)                | chemokine (C-C motif) lig   | MmuSTS.3569.1.S1_at     |
| B Cell Proliferation/Differentiation |                    | -3.7                   | -4.3                   | CD179b                     | Ig lambda chain V-II regi   | MmugDNA.23105.1.S1_s_at |
| Immune Defenses                      | Antiviral Proteins | -1.0                   | 2.6                    | alpha-defensin 3 precursor | alpha-defensin 3 precurs    | Mmu.7520.1.S1_x_at      |
| Immune Defenses                      | Antiviral Proteins | 1.2                    | 3.1                    | alpha-defensin 4 precursor | alpha-defensin 4 precurs    | Mmu.9266.1.S1_x_at      |

| Classification    | Sub-Classification     | SM Fold Changes 14 dpi | SM Fold Changes 30 dpi | Gene Symbol       | Gene Name                     | Affymetrix ID           |
|-------------------|------------------------|------------------------|------------------------|-------------------|-------------------------------|-------------------------|
| Immune Defenses   | IFN Related            | 2.0                    | 1.3                    | IFI27             | putative ISG12(c) protein     | MmunewRS.254.1.S1_at    |
| Immune Defenses   | IFN Related            | 5.2                    | 1.9                    | IFIT1 (IFI-56)    | IFIT1                         | MmuSTS.1579.1.S1_at     |
| Immune Defenses   | IFN Related            | 2.5                    | 1.4                    | IFIT3 (IFI-60)    | interferon-induced protein    | MmugDNA.19594.1.S1_at   |
| Immune Defenses   | IFN Related            | 2.6                    | 1.6                    | IFIT4             | interferon-induced protein    | MmugDNA.24962.1.S1_at   |
| Immune Defenses   | IFN Related            | 3.9                    | 1.7                    | MX1               | myxovirus (influenza viru     | MmuSTS.3006.1.S1_at     |
| Immune Defenses   | IFN Related            | 2.3                    | 1.2                    | OAS1              | 2'-5'-oligoadenylate synth    | MmuSTS.4655.1.S1_at     |
| Immune Defenses   | IFN Related            | 2.2                    | 1.3                    | OAS1              | 2'-5'-oligoadenylate synth    | MmuSTS.1612.1.S1_at     |
| Immune Defenses   | IFN Related            | 2.4                    | 1.1                    | OAS2              | 2-5-oligoadenylate synth      | MmugDNA.8486.1.S1_at    |
| Immune Defenses   | IFN Related            | 3.1                    | 1.7                    | RSAD2 (CIG5)      | radical S-adenosyl methi      | MmugDNA.41706.1.S1_at   |
| Immune Defenses   | IFN Related            | 2.1                    | 1.5                    | RSAD2 (CIG5)      | ---                           | MmuSTS.1497.1.S1_at     |
| Immune Defenses   | IFN Related            | 3.2                    | 1.8                    | IFI44             | interferon-induced, hepat     | MmugDNA.12892.1.S1_at   |
| Immune Defenses   | IFN Related            | 3.1                    | 2.4                    | IFI44             | interferon-induced, hepat     | MmuSTS.3682.1.S1_x_at   |
| Immune Defenses   | IFN Related            | 2.6                    | 2.0                    | STAT1             | signal transducer and act     | MmugDNA.23497.1.S1_at   |
| Immune Defenses   | IFN Related            | 2.0                    | 1.6                    | STAT1             | signal transducer and act     | MmuSTS.3917.1.S1_at     |
| Immune Defenses   | CD8 T cells, NK cells, | 4.4                    | 1.8                    | GZMA              | Granzyme A precursor (C       | MmugDNA.36434.1.S1_at   |
| Immune Defenses   | CD8 T cells, NK cells, | 2.3                    | 1.2                    | GZMB              | Granzyme B precursor (T       | MmugDNA.14204.1.S1_at   |
| Immune Defenses   | NK Cells               | 2.4                    | 1.7                    | KLRC1 (NKG2A)     | NKG2-A                        | MmuSTS.2945.1.S1_s_at   |
| Immune Defenses   | NK Cells               | 2.0                    | 1.2                    | KLRC3/NKG2E       | killer cell lectin-like recep | Mmu.1906.11.S1_a_at     |
| Immune Activation | Activation             | 2.4                    | 1.5                    | BAG2              | BAG family molecular ch       | MmuSTS.2142.1.S1_at     |
| Immune Activation | Activation             | 2.1                    | 1.8                    | FOXM1             | forkhead box M1 isoform       | MmugDNA.11364.1.S1_at   |
| Immune Activation | Activation             | 2.1                    | 1.4                    | HSPD1             | heat shock 60kDa protein      | MmugDNA.19456.1.S1_at   |
| Immune Activation | Activation             | 2.3                    | 1.7                    | TPX2              | TPX2, microtubule-assoc       | MmuSTS.4420.1.S1_at     |
| Immune Activation | Activation             | 2.0                    | 1.6                    | TZFP              | testis zinc finger protein    | MmuSTS.2900.1.S1_at     |
| Immune Activation | Activation             | 2.7                    | 2.0                    | SLC16A1 (MCT1)    | solute carrier family 16, n   | MmugDNA.21701.1.S1_at   |
| Immune Activation | Activation             | 2.0                    | 1.6                    | SLC16A1 (MCT1)    | solute carrier family 16, n   | MmuSTS.3828.1.S1_at     |
| Immune Activation | Activation             | 2.8                    | 1.4                    | CD38              | CD38 antigen                  | MmuSTS.1849.1.S1_at     |
| Immune Activation | Activation             | 2.6                    | 1.9                    | MKI67             | Antigen KI-67                 | MmugDNA.32726.1.S1_at   |
| Immune Activation | Activation             | 2.1                    | 2.2                    | MKI67             | Antigen KI-67                 | MmugDNA.32729.1.S1_at   |
| Immune Activation | Activation             | 2.6                    | 2.5                    | PCNA              | proliferating cell nuclear    | MmugDNA.865.1.S1_at     |
| Immune Activation | Activation             | 2.8                    | 2.3                    | PCNA              | Chromatin assembly fact       | MmuSTS.673.1.S1_s_at    |
| Immune Activation | Activation             | 4.6                    | 5.8                    | UHRF1             | ubiquitin-like, containi      | MmugDNA.19464.1.S1_at   |
| Immune Activation | Activation             | 3.0                    | 2.7                    | HELLS             | helicase, lymphoid-specif     | MmuSTS.61.1.S1_at       |
| Immune Activation | Activation             | 3.1                    | 2.0                    | HERC5             | hect domain and RLD 5         | MmugDNA.38910.1.S1_at   |
| Immune Activation | Activation             | 4.6                    | 5.5                    | PBK               | T-LAK cell-originated pro     | MmugDNA.33387.1.S1_at   |
| Immune Activation | Activation             | 2.2                    | 2.3                    | RFC3              | replication factor C 3        | MmugDNA.24482.1.S1_at   |
| Immune Activation | Activation             | 2.3                    | 2.8                    | RFC3              | replication factor C 3        | MmugDNA.18123.1.S1_at   |
| Immune Activation | Activation             | 5.5                    | 6.3                    | SHCBP1            | SHC SH2-domain binding        | MmugDNA.30433.1.S1_at   |
| Immune activation | Activation             | 1.4                    | 2.1                    | RBBP8             | retinoblastoma binding pr     | MmugDNA.24390.1.S1_at   |
| Immune activation | Activation             | 1.4                    | 2.6                    | LOC699158         | T-cell activation kelch re    | MmuSTS.3946.1.S1_at     |
| Immune Activation | Activation             | -2.2                   | -2.0                   | TCF7              | transcription factor 7 (T-c   | MmugDNA.40627.1.S1_s_at |
| Immune Activation | Activation             | -2.1                   | -1.8                   | TSPAN7            | tetraspanin 7                 | Mmu.11195.1.S1_at       |
| Immune Activation | Activation             | -1.9                   | -2.5                   | NFKB2             | nuclear factor of kappa lig   | MmugDNA.42566.1.S1_at   |
| Immune Activation | Activation             | -1.2                   | -2.4                   | SLC8A1            | solute carrier family 8 (so   | MmugDNA.19708.1.S1_at   |
| Immune Activation | Activation             | -1.1                   | -2.4                   | SLC8A1            | solute carrier family 8 (so   | MmugDNA.19708.1.S1_s_at |
| Immune Activation | Cell Cycle             | -1.9                   | -2.1                   | SILV              | Silver homolog                | MmugDNA.27504.1.S1_at   |
| Immune Activation | Cell Cycle             | 2.9                    | 3.5                    | Anillin           | anillin, actin binding prote  | MmugDNA.2951.1.S1_at    |
| Immune Activation | Cell Cycle             | 4.8                    | 6.2                    | Anillin           | anillin, actin binding prote  | MmugDNA.2951.1.S1_s_at  |
| Immune Activation | Cell Cycle             | 1.9                    | 2.2                    | Anillin           | anillin, actin binding prote  | MmugDNA.682.1.S1_at     |
| Immune Activation | Cell Cycle             | 3.8                    | 3.7                    | ASPM              | asp (abnormal spindle)-li     | MmugDNA.5265.1.S1_at    |
| Immune Activation | Cell cycle             | 3.2                    | 4.0                    | ASPM              | asp (abnormal spindle)-li     | MmugDNA.25197.1.S1_at   |
| Immune Activation | Cell Cycle             | 3.5                    | 4.0                    | BUB1              | ---                           | MmugDNA.14075.1.S1_at   |
| Immune Activation | Cell Cycle             | 3.7                    | 5.2                    | BUB1              | BUB1 budding uninhibite       | MmugDNA.6277.1.S1_at    |
| Immune Activation | Cell Cycle             | 5.7                    | 8.5                    | BUB1              | BUB1 budding uninhibite       | MmuSTS.2164.1.S1_at     |
| Immune Activation | Cell Cycle             | 4.4                    | 7.7                    | BUB1              | BUB1 budding uninhibite       | MmuSTS.2164.1.S1_s_at   |
| Immune Activation | Cell Cycle             | 2.5                    | 3.0                    | CASC5             | cancer susceptibility cand    | MmugDNA.10186.1.S1_at   |
| Immune Activation | Cell Cycle             | 4.5                    | 4.7                    | CDC2              | cell division cycle 2 prote   | MmugDNA.14959.1.S1_at   |
| Immune Activation | Cell Cycle             | 2.7                    | 3.0                    | CDC2              | cell division cycle 2 prote   | MmugDNA.25206.1.S1_at   |
| Immune Activation | Cell Cycle             | 3.9                    | 5.2                    | CDC2              | cell division cycle 2 prote   | MmugDNA.42865.1.S1_at   |
| Immune Activation | Cell Cycle             | 3.1                    | 2.5                    | CDC20             | cell division cycle 20        | MmugDNA.18794.1.S1_at   |
| Immune Activation | Cell Cycle             | 2.7                    | 2.0                    | CDC25A            | cell division cycle 25A iso   | MmugDNA.24430.1.S1_at   |
| Immune Activation | Cell Cycle             | 2.5                    | 2.0                    | CDC6              | CDC6 homolog                  | MmuSTS.3380.1.S1_at     |
| Immune Activation | Cell Cycle             | 3.6                    | 2.6                    | CDC6              | CDC6 homolog                  | MmugDNA.14956.1.S1_at   |
| Immune Activation | Cell Cycle             | 3.6                    | 3.8                    | CDCA1             | cell division cycle associ    | MmugDNA.2768.1.S1_at    |
| Immune Activation | Cell Cycle             | 2.1                    | 2.1                    | CDCA5             | cell division cycle associ    | MmugDNA.4124.1.S1_at    |
| Immune Activation | Cell Cycle             | 2.7                    | 4.2                    | CDCA7             | cell division cycle associ    | MmugDNA.17329.1.S1_at   |
| Immune Activation | Cell Cycle             | 3.3                    | 3.4                    | CDKN3             | cyclin-dependent kinase       | MmugDNA.10778.1.S1_at   |
| Immune Activation | Cell Cycle             | 5.3                    | 6.0                    | CDKN3             | cytoskeleton associated       | MmugDNA.6706.1.S1_at    |
| Immune Activation | Cell Cycle             | 2.1                    | 2.2                    | CDKN3             | cyclin-dependent kinase       | MmugDNA.34975.1.S1_s_at |
| Immune Activation | Cell Cycle             | 5.0                    | 4.9                    | CENPA             | centromere protein A          | MmugDNA.15250.1.S1_at   |
| Immune Activation | Cell Cycle             | 2.4                    | 2.8                    | CENPF             | centromere protein F (35      | MmuSTS.2672.1.S1_at     |
| Immune Activation | Cell Cycle             | 4.3                    | 5.0                    | CEP55             | centrosomal protein 55k       | MmugDNA.5873.1.S1_at    |
| Immune Activation | Cell Cycle             | 2.7                    | 2.6                    | CHEK1             | CHK1 checkpoint homolo        | MmugDNA.15754.1.S1_at   |
| Immune Activation | Cell Cycle             | 2.2                    | 1.8                    | CKS1B             | Cyclin-dependent kinase       | MmugDNA.15861.1.S1_s_at |
| Immune Activation | Cell Cycle             | 4.3                    | 3.9                    | CKS2              | CDC2c protein kinase 2        | MmugDNA.15862.1.S1_at   |
| Immune Activation | Cell Cycle             | 4.2                    | 4.5                    | Cyclin A (CCNA2)  | cyclin A                      | MmuSTS.3576.1.S1_at     |
| Immune Activation | Cell Cycle             | 2.2                    | 2.8                    | Cyclin A (CCNA2)  | cyclin A                      | MmugDNA.23764.1.S1_at   |
| Immune Activation | Cell Cycle             | 3.5                    | 4.2                    | Cyclin B1 (CCNB1) | cyclin B1                     | MmuSTS.3318.1.S1_at     |
| Immune Activation | Cell Cycle             | 5.4                    | 7.0                    | Cyclin B1 (CCNB1) | cyclin B1                     | MmugDNA.41268.1.S1_at   |
| Immune Activation | Cell Cycle             | 4.0                    | 4.5                    | Cyclin B2 (CCNB2) | cyclin B2                     | MmugDNA.40742.1.S1_at   |
| Immune Activation | Cell Cycle             | 4.0                    | 5.1                    | Cyclin E2 (CCNE2) | cyclin E2 isoform 1           | MmuSTS.3320.1.S1_at     |
| Immune Activation | Cell Cycle             | 3.1                    | 3.060714L40839801997   | DTL               | RA-regulated nuclear ma       | MmuSTS.1283.1.S1_at     |
| Immune Activation | Cell Cycle             | 1.9                    | 2.0                    | DTL               | DTL (hCdt2)                   | MmugDNA.29544.1.S1_at   |

| Classification    | Sub-Classification      | SM Fold Changes 14 dpi | SM Fold Changes 30 dpi | Gene Symbol                 | Gene Name                   | Affymetrix ID           |
|-------------------|-------------------------|------------------------|------------------------|-----------------------------|-----------------------------|-------------------------|
| Immune Activation | Cell Cycle              | 3.2                    | 3.1                    | E2F7                        | E2F transcription factor 7  | MmuSTS.2700.1.S1_at     |
| Immune Activation | Cell Cycle              | 2.7                    | 4.0                    | ECT2                        | epithelial cell transformin | MmugDNA.5165.1.S1_at    |
| Immune Activation | Cell Cycle              | 2.1                    | 1.5                    | FBXO5                       | F-box only protein 5        | MmugDNA.42135.1.S1_at   |
| Immune Activation | Cell Cycle              | 2.1                    | 2.2                    | FBXO5                       | F-box only protein 5        | MmuSTS.4762.1.S1_at     |
| Immune Activation | Cell Cycle              | 3.6                    | 3.6                    | GMNN                        | geminin, DNA replication    | MmuSTS.64.1.S1_at       |
| Immune Activation | Cell Cycle              | 3.1                    | 3.4                    | GTSE1                       | G-2 and S-phase expres      | MmugDNA.9770.1.S1_at    |
| Immune Activation | Cell Cycle              | 3.9                    | 4.0                    | HMMR (CD168)                | hyaluronan-mediated mo      | MmugDNA.24653.1.S1_at   |
| Immune Activation | Cell Cycle              | 4.2                    | 5.1                    | HMMR (CD168)                | hyaluronan-mediated mo      | MmugDNA.32449.1.S1_at   |
| Immune Activation | Cell Cycle              | 2.1                    | 2.0                    | HMMR (CD168)                | hyaluronan-mediated mo      | MmugDNA.32449.1.S1_s_at |
| Immune Activation | Cell Cycle              | 2.2                    | 2.5                    | INCENP                      | INCENP (Inner               | MmugDNA.39805.1.S1_at   |
| Immune Activation | Cell Cycle              | 3.6                    | 5.5                    | KIF11                       | kinesin family member 10    | MmugDNA.13565.1.S1_at   |
| Immune Activation | Cell Cycle              | 3.7                    | 3.9                    | KIF14                       | kinesin family member 14    | MmugDNA.35622.1.S1_at   |
| Immune Activation | Cell Cycle              | 2.2                    | 2.1                    | KIF18A                      | kinesin family member 18    | MmugDNA.32413.1.S1_at   |
| Immune Activation | Cell Cycle              | 3.6                    | 4.4                    | KIF23                       | kinesin family member 22    | MmugDNA.13584.1.S1_at   |
| Immune Activation | Cell Cycle              | 2.2                    | 2.0                    | KIF2C                       | kinesin family member 2C    | MmuSTS.1535.1.S1_at     |
| Immune Activation | Cell Cycle              | 2.4                    | 2.1                    | KIFC1                       | kinesin family member C     | MmugDNA.9497.1.S1_at    |
| Immune Activation | Cell Cycle              | 2.6                    | 3.2                    | KNSL7                       | kinesin family member 18    | MmugDNA.15585.1.S1_at   |
| Immune Activation | Cell Cycle              | 3.7                    | 3.8                    | LOC696772                   | discs large homolog 7       | MmuSTS.2303.1.S1_s_at   |
| Immune Activation | Cell Cycle              | 3.2                    | 3.4                    | MAD2A                       | Mitotic spindle assembly    | MmuSTS.4157.1.S1_at     |
| Immune Activation | Cell Cycle              | 2.6                    | 2.9                    | MAD2L1                      | Mitotic spindle assembly    | MmugDNA.17868.1.S1_at   |
| Immune Activation | Cell Cycle              | 2.3                    | 2.1                    | MCM2                        | Minichromosome mainte       | MmuSTS.144.1.S1_at      |
| Immune Activation | Cell Cycle              | 2.4                    | 2.7                    | MCM3                        | Minichromosome mainte       | MmugDNA.25436.1.S1_at   |
| Immune Activation | Cell Cycle              | 2.9                    | 2.6                    | MCM6                        | minichromosome mainte       | MmugDNA.35654.1.S1_at   |
| Immune Activation | Cell Cycle              | 2.1                    | 2.2                    | MCM7                        | minichromosome mainte       | MmugDNA.30376.1.S1_at   |
| Immune Activation | Cell cycle              | 4.2                    | 4.4                    | MELK                        | maternal embryonic leuc     | MmuSTS.1558.1.S1_at     |
| Immune Activation | Cell Cycle              | 3.0                    | 3.7                    | MLF1IP                      | MLF1 interacting protein    | MmugDNA.11747.1.S1_at   |
| Immune Activation | Cell Cycle              | 2.5                    | 2.5                    | MYBL2                       | MYB-related protein B       | MmugDNA.41887.1.S1_at   |
| Immune Activation | Cell Cycle              | 3.0                    | 3.4                    | NDC80                       | kinetochore associated 2    | MmugDNA.36470.1.S1_at   |
| Immune Activation | Cell Cycle              | 4.2                    | 3.1                    | NEK2                        | NIMA (never in mitosis g    | MmuSTS.1779.1.S1_at     |
| Immune Activation | Cell Cycle              | 3.6                    | 3.7                    | NUSAP1                      | nucleolar and spindle ass   | MmugDNA.38956.1.S1_at   |
| Immune Activation | Cell cycle              | 3.6                    | 3.2                    | OIP5                        | Opa-interacting protein 5   | MmuSTS.3327.1.S1_at     |
| Immune Activation | Cell Cycle              | 2.6                    | 2.3                    | PLK1                        | polo-like kinase            | MmuSTS.2029.1.S1_at     |
| Immune Activation | Cell Cycle              | 2.7                    | 2.2                    | RACGAP1                     | MmuSTS.2069.1.S1_at         | MmuSTS.2069.1.S1_at     |
| Immune Activation | Cell Cycle              | 2.7                    | 3.4                    | SGOL2                       | shugoshin-like 2            | MmugDNA.3428.1.S1_at    |
| Immune Activation | Cell Cycle              | 2.8                    | 3.8                    | SGOL2                       | shugoshin-like 2            | MmugDNA.43348.1.S1_at   |
| Immune Activation | Cell Cycle              | 2.5                    | 3.2                    | SMC2L1                      | structural maintenance of   | MmugDNA.18586.1.S1_at   |
| Immune Activation | Cell Cycle              | 1.7                    | 2.8                    | SMC2L1                      | structural maintenance of   | MmugDNA.25187.1.S1_at   |
| Immune Activation | Cell Cycle              | 2.0                    | 2.4                    | SMC4L1                      | SMC4 structural mainten     | MmugDNA.29900.1.S1_s_at |
| Immune Activation | Cell Cycle              | 2.1                    | 2.8                    | SMC4L1                      | SMC4 structural mainten     | MmugDNA.31959.1.S1_at   |
| Immune Activation | Cell Cycle              | 2.4                    | 2.3                    | SPAG5                       | sperm associated antigen    | MmugDNA.19272.1.S1_s_at |
| Immune Activation | Cell Cycle              | 2.8                    | 2.2                    | SPC25                       | spindle pole body compo     | MmugDNA.20397.1.S1_at   |
| Immune Activation | Cell Cycle              | 2.4                    | 2.2                    | STIL                        | SCL/TAL1 interrupting lo    | MmuSTS.220.1.S1_at      |
| Immune Activation | Cell Cycle              | 2.4                    | 2.0                    | TFDP1 (DP1)                 | transcription factor Dp-0   | MmugDNA.14322.1.S1_at   |
| Immune Activation | Cell Cycle              | 3.9                    | 4.2                    | UBE2C                       | Ubiquitin-conjugating enz   | MmugDNA.25384.1.S1_at   |
| Immune Activation | Cell Cycle              | 2.0                    | 2.7                    | WEE1                        | Wee1-like protein kinase    | MmugDNA.3114.1.S1_at    |
| Immune Activation | Cell Cycle              | 3.0                    | 3.2                    | ZWINT                       | ZW10 interactor (ZW10-I     | MmugDNA.2694.1.S1_at    |
| Immune Activation | Cell Cycle              | 2.4                    | 1.2                    | cyclin D2 (CCND2)           | G1/S-specific cyclin-D2     | MmugDNA.18851.1.S1_at   |
| Immune Activation | Cell Cycle              | 2.8                    | 1.7                    | Cyclin E1 (CCNE1)           | cyclin E1 isoform 1         | MmugDNA.4085.1.S1_at    |
| Immune Activation | Cell Cycle              | 2.0                    | 1.7                    | GSPT1                       | G1 to S phase transition    | MmuSTS.225.1.S1_at      |
| Immune Activation | Cell Cycle              | 2.1                    | 1.8                    | TIPIN                       | timeless-interacting prote  | MmugDNA.30164.1.S1_at   |
| Immune Activation | Cell Cycle              | 1.6                    | 2.2                    | BRIP1                       | BRC A1 interacting protei   | MmugDNA.15158.1.S1_at   |
| Immune Activation | Cell Cycle              | 2.0                    | 2.0                    | CENPM                       | CENPM                       | MmugDNA.19768.1.S1_at   |
| Immune Activation | pro-Inflammation        | -1.0                   | 3.5                    | S100A8                      | S100 calcium binding pro    | MmugDNA.17376.1.S1_at   |
| Immune Activation | pro-Inflammation        | 1.1                    | 3.3                    | S100A9                      | S100 calcium binding pro    | MmuSTS.2130.1.S1_s_at   |
| Immune Activation | Signal Transduction     | 1.1                    | 2.5                    | CRISP3                      | cysteine-rich secretory pr  | MmugDNA.38029.1.S1_at   |
| Immune Activation | Signal Transduction     | 1.5                    | 2.3                    | LNX1                        | ligand of numb-protein X    | MmugDNA.43480.1.S1_at   |
| Immune Activation | Signal Transduction     | 1.2                    | 2.0                    | LOC699256                   | testis expressed sequenc    | MmugDNA.10238.1.S1_at   |
| Immune Activation | Signal Transduction     | 1.6                    | 2.1                    | LOC700839                   | G protein-coupled recep     | MmugDNA.27652.1.S1_at   |
| Immune Activation | Signal Transduction     | 1.5                    | 2.4                    | LOC703987                   | Di-Ras2                     | MmugDNA.2925.1.S1_at    |
| Immune Activation | Signal Transduction     | 1.1                    | 2.3                    | LOC705748                   | SH2 domain binding pro      | MmugDNA.10771.1.S1_at   |
| Immune Activation | Signal Transduction     | 1.3                    | 3.1                    | LOC707343                   | kelch-like 14               | MmuSTS.1606.1.S1_at     |
| Immune Activation | Signal Transduction     | 1.4                    | 2.8                    | LOC711012                   | protein phosphatase 1E      | MmugDNA.22095.1.S1_at   |
| Immune Activation | Signal Transduction     | -1.1                   | 2.6                    | LOC712688                   | regulator of G-protein sig  | Mmu.1384.2.S1_at        |
| Immune Activation | Signal Transduction     | -1.4                   | 6.5                    | LOC712688                   | regulator of G-protein sig  | MmuSTS.3764.1.S1_at     |
| Immune Activation | Signal Transduction     | 1.5                    | 2.2                    | LOC717165                   | Ral GEF with PH domain      | MmugDNA.17171.1.S1_at   |
| Immune Activation | Signal Transduction     | 1.3                    | 2.5                    | LOC717165                   | Ral GEF with PH domain      | MmugDNA.33772.1.S1_at   |
| Immune Activation | Signal Transduction     | 1.6                    | 2.1                    | PLCG2                       | phospholipase C, gamma      | MmuSTS.2246.1.S1_at     |
| Immune Activation | TCR Signaling           | -2.1                   | -1.6                   | TCR alpha chain C region    | T-cell receptor alpha cha   | MmugDNA.19732.1.S1_s_at |
| Immune Activation | TCR Signaling           | -2.0                   | -1.5                   | TCR beta chain C region     | T-cell receptor beta chain  | Mmu.126.1.S1_a_at       |
| Immune Activation | TCR Signaling           | -2.4                   | -1.7                   | TCR rearranged beta-chain V | T-cell receptor rearrange   | Mmu.11421.1.S1_a_at     |
| Immune Activation | TCR Signaling           | -2.2                   | -1.7                   | LEF1                        | lymphoid enhancer bindin    | Mmu.4923.1.S1_at        |
| Immune Activation | TCR Signaling           | -2.2                   | -1.2                   | LEF1                        | lymphoid enhancer bindin    | MmuSTS.1438.1.S1_at     |
| Immune Activation | TCR Signaling           | -2.2                   | -2.0                   | LEF1                        | lymphoid enhancer bindin    | MmugDNA.32273.1.S1_at   |
| Immune Activation | Transcriptional Regulat | 2.1                    | 2.0                    | BARD1                       | BRC A1 associated RING      | MmuSTS.549.1.S1_at      |
| Immune Activation | Transcriptional Regulat | 5.2                    | 4.7                    | LOC715235                   | chromosome condensat        | MmugDNA.11557.1.S1_at   |
| Immune Activation | Transcriptional Regulat | 1.3                    | 2.0                    | LOC720557                   | methyl-CpG binding dom      | MmugDNA.12549.1.S1_at   |
| Immune Activation | Transcriptional Regulat | -1.1                   | 2.1                    | EP300                       | E1A binding protein p300    | MmugDNA.17977.1.S1_at   |
| Immune Activation | Transcriptional Regulat | 1.8                    | 2.2                    | LOC703598                   | high-mobility group box     | MmugDNA.36293.1.S1_at   |
| Immune Activation | Transcriptional Regulat | -1.2                   | 2.1                    | BACH2                       |                             | MmugDNA.3201.1.S1_at    |
| Immune Activation | Transcriptional Regulat | 1.2                    | 2.4                    | LOC702182                   | zinc finger protein 608     | MmugDNA.30581.1.S1_at   |
| Immune Activation | Transcriptional Regulat | 1.8                    | 9.7                    | MYBL1                       | v-myb myeloblastosis vir    | MmuSTS.3220.1.S1_at     |
| Immune Activation | Transcriptional Regulat | -1.6                   | -2.2                   | LOC708322                   | vasculin                    | Mmu.12457.1.S1_s_at     |

| Classification                                         | Sub-Classification             | SM Fold Changes 14 dpi | SM Fold Changes 30 dpi | Gene Symbol             | Gene Name                                                 | Affymetrix ID           |
|--------------------------------------------------------|--------------------------------|------------------------|------------------------|-------------------------|-----------------------------------------------------------|-------------------------|
| Immune Activation                                      | Transcriptional Regulation     | -1.7                   | -2.2                   | LOC708322               | vasculin                                                  | Mmu.12457.1.S1_at       |
| Immune Activation                                      | Cytokine and Cytokine          | -1.7                   | -2.2                   | IL1B                    | interleukin 1, beta                                       | MmuSTS.652.1.S1_at      |
| Immune Activation                                      | Cytokine and Cytokine          | -2.0                   | -1.3                   | IL7R (CD127)            | interleukin 7 receptor                                    | MmugDNA.8010.1.S1_at    |
| Immune Activation                                      | Cytokine and Cytokine          | 2.2                    | 1.8                    | TFEC                    | TFEC                                                      | MmugDNA.17449.1.S1_at   |
| Immune Activation                                      | Cytokine and Cytokine          | 2.1                    | 2.2                    | HMGB3                   | high-mobility group box 3                                 | MmuSTS.236.1.S1_at      |
| Moderators of Activation & Inflammation                | Moderators of Activation       | 3.0                    | 1.5                    | TXNDC5                  | thioredoxin domain-containing protein 5                   | MmugDNA.2427.1.S1_at    |
| Moderators of Activation & Inflammation                | Moderators of Activation       | 4.0                    | 2.3                    | TNFRSF17 (CD269) (BCMA) | Tumor necrosis factor receptor 17                         | MmugDNA.5879.1.S1_at    |
| Moderators of Activation & Inflammation                | Moderators of Activation       | 1.8                    | 2.1                    | AKR7A3                  | Aldo-keto reductase family 7 member A3                    | MmugDNA.38789.1.S1_at   |
| Moderators of Activation & Inflammation                | Mediators                      | 1.3                    | 2.0                    | SLC4A7                  | solute carrier family 4, subfamily 7 member 7             | MmuSTS.4323.1.S1_at     |
| Moderators of Activation & Inflammation                | Mediators                      | 1.0                    | 2.0                    | SLC4A7                  | solute carrier family 4, subfamily 7 member 7             | MmugDNA.896.1.S1_at     |
| Moderators of Activation & Inflammation                | Moderators of Activation       | -2.2                   | -2.3                   | CD40LG (CD154)          | CD40 ligand (TNF superfamily member 5)                    | MmuSTS.4670.1.S1_s_at   |
| Moderators of Activation & Inflammation                | Moderators of Activation       | -2.3                   | -2.4                   | CD40LG (CD154)          | CD40 ligand (TNF superfamily member 5)                    | Mmu.4194.1.S1_at        |
| Moderators of Activation & Inflammation                | Moderators of Activation       | -2.6                   | -2.6                   | DGKA                    | diacylglycerol kinase, alpha                              | MmugDNA.1751.1.S1_at    |
| Moderators of Activation & Inflammation                | Moderators of Activation       | -1.9                   | -2.1                   | TXNIP                   | thioredoxin interacting protein                           | MmugDNA.31897.1.S1_at   |
| Moderators of Activation & Inflammation                | Moderators of Activation       | -2.3                   | -2.7                   | TXNIP                   | thioredoxin interacting protein                           | MmugDNA.31894.1.S1_at   |
| Moderators of Activation & Inflammation                | Moderators of Activation       | -2.2                   | -2.6                   | TXNIP                   | thioredoxin interacting protein                           | Mmu.7507.2.S1_at        |
| Moderators of Activation & Inflammation                | Moderators of Activation       | -2.6                   | -2.7                   | TXNIP                   | thioredoxin interacting protein                           | MmugDNA.31894.1.S1_s_at |
| Moderators of Activation & Inflammation                | Moderators of Activation       | -2.1                   | -1.2                   | TIMD4                   | T-cell immunoglobulin and ITIM domain                     | MmugDNA.1353.1.S1_at    |
| Moderators of Activation & Inflammation                | Moderators of Activation       | -2.1                   | -1.7                   | TSC22                   | transforming growth factor beta 22                        | MmuSTS.4615.1.S1_at     |
| Moderators of Activation & Inflammation                | Negative regulation of         | -1.8                   | -2.3                   | TGFB1                   | transforming growth factor beta 1                         | Mmu.6776.1.S1_at        |
| Moderators of Activation & Inflammation                | Negative regulation of         | -1.9                   | -2.1                   | LOC702385               | Ras association domain protein 10                         | Mmu.5207.1.S1_at        |
| Moderators of Activation & Inflammation                | Negative regulation of         | -1.8                   | -2.0                   | IGFBP5                  | insulin-like growth factor binding protein 5              | Mmu.5435.1.S1_at        |
| Moderators of Activation & Inflammation                | Negative regulation of         | -1.6                   | -2.3                   | DPT                     | Dermatopontin precursor                                   | MmugDNA.38796.1.S1_s_at |
| Moderators of Activation & Inflammation                | Negative regulation of         | -2.2                   | -2.8                   | DPT                     | Dermatopontin precursor                                   | MmugDNA.35051.1.S1_at   |
| Moderators of Activation & Inflammation                | Negative regulation of         | 3.0                    | 2.0                    | LOC714207               | G-2 and S-phase arrest protein 1                          | MmugDNA.33793.1.S1_at   |
| Moderators of Activation & Inflammation (Antioxidants) |                                | 1.9                    | 2.2                    | KMO                     | KMO                                                       | MmugDNA.25657.1.S1_at   |
| Moderators of Activation & Inflammation (Antioxidants) |                                | 1.9                    | 2.2                    | TMPO (LAP2)             | TMPO                                                      | MmugDNA.41740.1.S1_at   |
| Moderators of Activation & Inflammation (Antioxidants) |                                | 4.1                    | 5.5                    | E2F8                    | E2F family member 7                                       | MmugDNA.12490.1.S1_at   |
| Moderators of Activation & Inflammation (Antioxidants) |                                | 2.5                    | 1.8                    | PPII5                   | peptidylprolyl isomerase 5                                | MmugDNA.20073.1.S1_at   |
| Tissue Repair, Remodeling                              | Extracellular Matrix Structure | 1.1                    | 2.1                    | ELA2                    | elastase 2, neutrophil                                    | MmugDNA.38450.1.S1_at   |
| Tissue Repair, Remodeling                              | Extracellular Matrix Structure | 1.1                    | 2.1                    | LOC694095               | echinoderm microtubule                                    | MmugDNA.13576.1.S1_at   |
| Tissue Repair, Remodeling                              | Extracellular Matrix Structure | -1.6                   | -2.3                   | FBLN1                   | fibulin 1                                                 | MmugDNA.38728.1.S1_at   |
| Tissue Repair, Remodeling                              | Extracellular Matrix Structure | -1.9                   | -2.2                   | LOC700181               | Dermatopontin precursor                                   | MmugDNA.35052.1.S1_at   |
| Tissue Repair, Remodeling                              | Extracellular Matrix Structure | -2.1                   | -2.5                   | DCN                     | decorin                                                   | MmugDNA.32965.1.S1_at   |
| Tissue Repair, Remodeling                              | Extracellular Matrix Structure | -2.1                   | -2.4                   | DCN                     | decorin                                                   | MmugDNA.14528.1.S1_s_at |
| Tissue Repair, Remodeling                              | Extracellular Matrix Structure | -2.2                   | -2.4                   | DCN                     | decorin                                                   | MmugDNA.22700.1.S1_at   |
| Tissue Repair, Remodeling                              | Extracellular Matrix Structure | -2.0                   | -2.1                   | LOC709521               | microfibrillar-associated protein 1                       | MmuSTS.159.1.S1_at      |
| Tissue Repair, Remodeling                              | Extracellular Matrix Structure | -2.1                   | -1.5                   | SPOCK2                  | sparc/osteonectin, cwcv domain containing 2               | MmugDNA.7832.1.S1_at    |
| Tissue Repair, Remodeling                              | Extracellular Matrix Structure | -2.0                   | -1.6                   | STAB2                   | stabilin 2                                                | MmugDNA.15867.1.S1_at   |
| Tissue Repair, Remodeling                              | Extracellular Matrix Structure | 2.1                    | 1.1                    | EGGF1                   | endothelial cell growth factor 1                          | MmugDNA.9266.1.S1_at    |
| Tissue Repair, Remodeling                              | Extracellular Matrix Structure | 2.1                    | -1.1                   | SDC1 (CD138)            | Syndecan-1 precursor (S)                                  | MmugDNA.27367.1.S1_x_at |
| Tissue Repair, Remodeling                              | Extracellular Matrix Structure | 2.2                    | -1.0                   | SDC1 (CD138)            | Syndecan-1 precursor (S)                                  | MmugDNA.27367.1.S1_at   |
| Tissue Repair, Remodeling                              | Nerve-related growth           | 2.0                    | 2.1                    | LOC704085               | M-phase phosphoprotein 1                                  | MmuSTS.4168.1.S1_at     |
| Tissue Repair, Remodeling                              | Nerve Related Growth           | 5.0                    | 3.0                    | UCH-L1 (PGP9.5)         | Ubiquitin carboxyl-terminal hydrolase L1                  | MmugDNA.7056.1.S1_s_at  |
| Tissue Repair, Remodeling                              | Nerve Related Growth           | 5.0                    | 4.0                    | UCH-L1 (PGP9.5)         | Ubiquitin carboxyl-terminal hydrolase L1                  | MmugDNA.7056.1.S1_at    |
| Tissue Repair, Remodeling                              | Nerve-related growth           | 1.6                    | 2.2                    | LOC696717               | otofelin isoform A                                        | MmugDNA.9131.1.S1_at    |
| Tissue Repair, Remodeling                              | Nerve-related growth           | 1.2                    | 2.1                    | LOC713673               | neural precursor cell expressed, highly variable 1        | MmugDNA.28623.1.S1_at   |
| Tissue Repair, Remodeling                              | Nerve-related growth           | 1.2                    | 2.0                    | MEGF9                   | multiple EGF-like-domain protein 9                        | MmugDNA.39298.1.S1_at   |
| Tissue Repair, Remodeling                              | Oxidative-Stress Related       | 2.4                    | 1.3                    | SOD2                    | superoxide dismutase 2                                    | MmugDNA.24030.1.S1_at   |
| Tissue Repair, Remodeling                              | Tissue Remodeling              | -1.5                   | -2.1                   | TIMP3                   | TIMP metalloproteinase 3                                  | MmugDNA.33324.1.S1_at   |
| Tissue Repair, Remodeling                              |                                | 2.8                    | 1.8                    | SCIN                    | scinderin                                                 | MmuSTS.1778.1.S1_at     |
| Metabolism                                             | Lipids & Glucose               | -1.8                   | -2.3                   | FABP4                   | fatty acid binding protein 4                              | MmugDNA.31873.1.S1_at   |
| Metabolism                                             | Lipids & Glucose               | -1.6                   | -2.2                   | PKFEB3                  | 6-phosphofructo-2-kinase                                  | MmugDNA.2360.1.S1_at    |
| Metabolism                                             | Lipids & Glucose               | 1.6                    | 2.0                    | SLC2A5                  | solute carrier family 2 (facilitated glucose transporter) | MmugDNA.1987.1.S1_at    |
| Metabolism                                             | Lipids & Glucose               | -2.2                   | -1.3                   | AMY2A                   | amylase, alpha 2A; pancreatic                             | MmugDNA.4900.1.S1_s_at  |
| Metabolism                                             | Lipids & Glucose               | -2.3                   | -1.5                   | LGAL313                 | Galactoside-binding soluble lectin 3                      | MmugDNA.43117.1.S1_at   |
| Metabolism                                             | Lipids & Glucose               | -2.0                   | -1.2                   | SCD                     | stearoyl-CoA desaturase                                   | MmugDNA.38238.1.S1_at   |
| Metabolism                                             | Lipids & Glucose               | 2.9                    | 1.2                    | CYP1B1                  | cytochrome P450, family 1, subfamily B, polypeptide 1     | MmuSTS.4020.1.S1_at     |
| Metabolism                                             | Lipids & Glucose               | 2.7                    | 1.4                    | CYP1B1                  | cytochrome P450, family 1, subfamily B, polypeptide 1     | MmugDNA.36286.1.S1_at   |
| Metabolism                                             | Lipids & Glucose               | 2.3                    | 1.0                    | CYP1B1                  | cytochrome P450, family 1, subfamily B, polypeptide 1     | MmugDNA.30721.1.S1_at   |
| Metabolism                                             | Lipids & Glucose               | 2.0                    | 1.9                    | FH                      | fumarate hydratase                                        | MmuSTS.2656.1.S1_at     |
| Metabolism                                             | Lipids & Glucose               | 2.1                    | 1.8                    | MANEA                   | mannosidase, endo-alpha-N-acetylglucosaminidase           | MmugDNA.11821.1.S1_at   |
| Metabolism                                             | Lipids & Glucose               | 2.1                    | 1.3                    | STT3A                   | integral membrane protein                                 | MmugDNA.21146.1.S1_at   |
| Metabolism                                             | Metals/Ions                    | 2.2                    | 1.3                    | PPA1                    | pyrophosphatase 1                                         | Mmu.4786.2.S1_at        |
| Metabolism                                             | Metals/Ions                    | 2.3                    | 1.4                    | PPA1                    | pyrophosphatase 2                                         | Mmu.4786.2.S1_s_at      |
| Metabolism                                             | Metals/Ions                    | 2.4                    | 1.6                    | PPA1                    | pyrophosphatase 3                                         | MmugDNA.35236.1.S1_at   |
| Metabolism                                             | Nucleic Acids                  | 2.8                    | 2.1                    | DHFR                    | Dihydrofolate reductase                                   | MmugDNA.10792.1.S1_at   |
| Metabolism                                             | Metals/Ions                    | 2.3                    | 3.0                    | KLHL23                  | KLHL23                                                    | MmugDNA.36416.1.S1_at   |
| Metabolism                                             | Nucleic Acids                  | 6.0                    | 4.3                    | LOC700582               | Probable dimethyladenosine methyltransferase 1            | MmuSTS.3275.1.S1_at     |
| Metabolism                                             | Nucleic Acids                  | 2.5                    | 2.0                    | NPM1                    | Nucleophosmin (NPM)                                       | MmugDNA.4269.1.S1_at    |
| Metabolism                                             | Nucleic Acids                  | 6.3                    | 5.2                    | RRM2                    | ribonucleotide reductase subunit 2                        | MmugDNA.31369.1.S1_at   |
| Metabolism                                             | Nucleic Acids                  | 2.9                    | 2.4                    | TYMS                    | thymidylate synthetase                                    | MmugDNA.30056.1.S1_at   |
| Metabolism                                             | Nucleic Acids                  | 4.1                    | 3.9                    | TYMS                    | thymidylate synthetase                                    | MmuSTS.4685.1.S1_at     |
| Metabolism                                             | Nucleic Acids                  | 2.3                    | 1.5                    | AHCY                    | S-adenosylhomocysteine hydrolase                          | MmuSTS.44.1.S1_at       |
| Metabolism                                             | Nucleic Acids                  | 2.4                    | 1.8                    | FEN1                    | flap structure-specific endonuclease 1                    | MmuSTS.2645.1.S1_at     |
| Metabolism                                             | Nucleic Acids                  | 2.0                    | 1.4                    | GART                    | phosphoribosylglycinamide formyltransferase               | MmugDNA.18615.1.S1_at   |
| Metabolism                                             | Nucleic Acids                  | 2.4                    | 1.8                    | LOC695725               | uridine-cytidine kinase 2                                 | MmugDNA.43419.1.S1_at   |
| Metabolism                                             | Nucleic Acids                  | 2.1                    | 1.6                    | SYNCRIP                 | NS1-associated protein 1                                  | MmugDNA.20772.1.S1_s_at |
| Metabolism                                             | Nucleic Acids                  | 1.7                    | 5.2                    | DCK                     | ---                                                       | MmugDNA.36254.1.S1_at   |
| Metabolism                                             | Nucleic Acids                  | -1.0                   | 2.1                    | LOC698070               | NSE1                                                      | MmugDNA.21019.1.S1_at   |
| Metabolism                                             | Nucleic Acids                  | 1.3                    | 2.2                    | LOC707062               | ribonucleotide reductase subunit 1                        | Mmu.9802.1.S1_at        |
| Metabolism                                             | Nucleic Acids                  | 1.2                    | 2.4                    | LOC707062               | ribonucleotide reductase subunit 1                        | MmuSTS.2129.1.S1_at     |



| Classification | Sub-Classification      | SM Fold Changes 14 dpi | SM Fold Changes 30 dpi | Gene Symbol     | Gene Name                   | Affymetrix ID           |
|----------------|-------------------------|------------------------|------------------------|-----------------|-----------------------------|-------------------------|
| Metabolism     | Nucleic Acids           | 1.4                    | 2.8                    | LOC711271       | elongation factor RNA p     | MmuSTS.4320.1.S1_at     |
| Metabolism     | Nucleic Acids           | 1.3                    | 2.1                    | MSH2            |                             | MmuSTS.316.1.S1_at      |
| Metabolism     | Nucleic Acids           | 2.0                    | 2.2                    | RRM1            | RRM1                        | MmugDNA.26585.1.S1_at   |
| Metabolism     | Nucleic Acids           | 2.1                    | 2.1                    | TK1             | thymidine kinase 1, solu    | MmugDNA.24372.1.S1_at   |
| Metabolism     | Proteins                | 1.7                    | 2.1                    |                 | Function: E3 ubiquitin-     | MmugDNA.31588.1.S1_s_at |
| Metabolism     | Proteins                | -1.0                   | 2.2                    | B4GALT6         | UDP-Gal:betaGlcNAc be       | MmugDNA.18724.1.S1_s_at |
| Metabolism     | Proteins                | -1.1                   | 2.5                    | B4GALT6         | UDP-Gal:betaGlcNAc be       | MmugDNA.38184.1.S1_at   |
| Metabolism     | Proteins                | 1.9                    | 2.1                    | LOC696756       | NS1-associated protein      | MmugDNA.38526.1.S1_at   |
| Metabolism     | Proteins                | 1.7                    | 2.2                    | LOC713533       | selenophosphate synthe      | MmugDNA.13390.1.S1_at   |
| Metabolism     | Proteins                | -1.7                   | -2.2                   | LOC713999       | tumor differentially expre  | Mmu.9654.1.S1_at        |
| Metabolism     | Proteins                | -1.3                   | -2.1                   | LOC717617       | methionine sulfoxide red    | MmugDNA.37672.1.S1_s_at |
| Metabolism     | Proteins                | 1.0                    | -2.0                   | SRPR            | signal recognition particl  | MmugDNA.308.1.S1_at     |
| Metabolism     | Proteins                | -1.1                   | -2.2                   | METTL7A         | METTL7A                     | MmugDNA.38570.1.S1_s_at |
| Metabolism     | Proteins                | 2.1                    | 1.4                    | DNAJB11         | DnaJ (Hsp40) homolog, s     | MmuSTS.4249.1.S1_at     |
| Metabolism     | Proteins                | 2.2                    | 1.7                    | ETF1            | eukaryotic translation ter  | MmugDNA.19076.1.S1_s_at |
| Metabolism     | Proteins                | 2.1                    | 1.6                    | MRPL15          | mitochondrial ribosomal p   | MmuSTS.954.1.S1_at      |
| Metabolism     | Proteins                | 2.1                    | 1.5                    | MRPL19          | mitochondrial ribosomal p   | MmuSTS.1524.1.S1_at     |
| Metabolism     | Proteins                | 2.1                    | 1.4                    | PDI4            | protein disulfide isomera   | MmugDNA.9838.1.S1_at    |
| Metabolism     | Proteins                | 2.2                    | 1.6                    | SAR1B           | SAR1 homolog B (S. cer      | MmugDNA.38135.1.S1_at   |
| Metabolism     | Proteins                | 2.3                    | 1.4                    | SPCS3           | signal peptidase complex    | MmugDNA.32060.1.S1_s_at |
| Metabolism     | Proteins                | 2.0                    | -1.0                   | TRA1 ( HSP90B1) | tumor rejection antigen (d  | MmugDNA.6621.1.S1_at    |
| Metabolism     | Proteins                | 2.0                    | 1.2                    | TRA1 ( HSP90B1) | tumor rejection antigen (d  | Mmu.4005.1.S1_s_at      |
| Metabolism     | Proteins                | 3.3                    | 2.7                    | PSAT1           | phosphoserine aminotra      | MmugDNA.38346.1.S1_at   |
| Metabolism     | Proteins                | -4.1                   | -2.6                   | LOC714206       | ATP-binding cassette, su    | MmunewRS.1009.1.S1_at   |
| Metabolism     | Proteins                | -3.7                   | -1.8                   | LOC693289       | ATP-binding cassette, su    | MmuSTS.2655.1.S1_at     |
| Metabolism     | Proteins: Proteasome    | 2.0                    | 1.3                    | PSMA3           | Proteasome subunit alph     | MmugDNA.22343.1.S1_s_at |
| Metabolism     | Proteins: Proteasome    | 2.3                    | 1.8                    | UBE2J1          | ubiquitin-conjugating enz   | MmugDNA.42067.1.S1_at   |
| Metabolism     | Proteins: Proteasome    | 2.3                    | 1.7                    | UBE2S           | Ubiquitin-conjugating enz   | MmugDNA.15298.1.S1_x_at |
| Metabolism     | Proteins: Proteasome    | 2.5                    | 1.9                    | UBE2S           | Ubiquitin-conjugating enz   | MmugDNA.15298.1.S1_at   |
| Metabolism     | Proteins: Proteasome    | 2.2                    | 1.4                    | UBE2T           | Ubiquitin-conjugating enz   | MmugDNA.22787.1.S1_at   |
| Metabolism     | Proteins: Proteasome    | 2.2                    | 1.6                    | UCHL5           | ubiquitin C-terminal hydr   | Mmu.1412.1.S1_at        |
| Metabolism     | Proteins: Proteasome    | 2.1                    | 1.6                    | UCHL5           | ubiquitin C-terminal hydr   | MmugDNA.15179.1.S1_at   |
| Metabolism     | Proteins: Proteasome    | 2.1                    | 1.9                    | UCHL5           | ubiquitin C-terminal hydr   | MmuSTS.4734.1.S1_at     |
| Metabolism     |                         | 2.1                    | 1.3                    | NOO1            | NAD(P)H dehydrogenase       | MmuSTS.3015.1.S1_at     |
| Metabolism     |                         | 1.3                    | 2.7                    | AQP4            | aquaporin 4                 | MmugDNA.6205.1.S1_at    |
| Others         | Cell adhesion           | -1.4                   | -2.4                   | PCDHA11         | Protocadherin alpha 11      | MmugDNA.37873.1.S1_at   |
| Others         | Cell Morphology         | -1.3                   | -2.0                   | TAGLN           | transgelin                  | MmugDNA.30842.1.S1_s_at |
| Others         | Cytoskeleton Related    | -1.7                   | -4.4                   | IQGAP1          | IQGAP1                      | MmugDNA.19813.1.S1_at   |
| Others         | Cytoskeleton Related    | 2.5                    | 2.5                    | DIAPH3          | diaphanous homolog 3        | MmugDNA.22775.1.S1_at   |
| Others         | Cytoskeleton Related    | 2.2                    | 1.7                    | TUBA6           | tubulin alpha 6             | MmugDNA.32666.1.S1_s_at |
| Others         | DNA Replication/Repa    | 2.2                    | 1.7                    | RAD51           | RAD51 homolog protein       | MmugDNA.23761.1.S1_at   |
| Others         | DNA Replication/Repa    | 2.3                    | 1.8                    | GINS2           | GINS complex subunit 2      | MmuSTS.2066.1.S1_at     |
| Others         | DNA Replication/Repa    | 2.1                    | 1.5                    | EXO1            | exonuclease 1 isoform b     | MmugDNA.17950.1.S1_s_at |
| Others         | DNA Replication/Repa    | 2.2                    | 2.8                    | HMGGB2          | high-mobility group box 2   | MmuSTS.1347.1.S1_at     |
| Others         | DNA Replication/Repa    | 3.3                    | 3.3                    | POLE2           | DNA polymerase epsilon      | MmugDNA.2975.1.S1_at    |
| Others         | DNA Replication/Repa    | 2.5                    | 2.7                    | RAD51AP1        | RAD51-associated prote      | MmuSTS.4250.1.S1_at     |
| Others         | DNA Replication/Repa    | 4.7                    | 4.6                    | TOP2A           | DNA topoisomerase II, al    | MmugDNA.12273.1.S1_at   |
| Others         | DNA Replication/Repa    | 3.9                    | 4.3                    | TOP2A           | DNA topoisomerase II, al    | MmugDNA.12277.1.S1_at   |
| Others         | DNA Replication/Repa    | 1.6                    | 2.1                    | SMC4            | CAP-C                       | MmugDNA.20926.1.S1_at   |
| Others         | ER-Golgi Related        | 2.0                    | 1.5                    | ERGIC1          | endoplasmic reticulum-g     | MmugDNA.42416.1.S1_s_at |
| Others         | ER-Golgi Related        | 2.0                    | 1.6                    | ERGIC1          | endoplasmic reticulum-g     | MmugDNA.42416.1.S1_at   |
| Others         | ER-Golgi Related        | 2.1                    | 1.1                    | SSR1            | Translocon-associated p     | MmugDNA.7350.1.S1_s_at  |
| Others         | Insulin-like Growth Fac | 2.2                    | 3.5                    | IMP-3           | insulin-like growth factor  | MmugDNA.31012.1.S1_at   |
| Others         | Insulin-like Growth Fac | 2.3                    | 3.7                    | IMP-3           | insulin-like growth factor  | MmugDNA.15520.1.S1_s_at |
| Others         | Insulin-like Growth Fac | 2.1                    | 6.1                    | IMP-3           | insulin-like growth factor  | MmugDNA.15520.1.S1_at   |
| Others         | Insulin-like Growth Fac | -1.8                   | -2.2                   | IGFBP5          | ---                         | MmugDNA.42888.1.S1_at   |
| Others         | Insulin-like Growth Fac | -1.7                   | -2.0                   | IGFBP5          | ---                         | MmugDNA.42890.1.S1_at   |
| Others         | Insulin-like Growth Fac | -1.8                   | -2.3                   | LOC721120       | Insulin-like growth factor  | MmugDNA.23210.1.S1_x_at |
| Others         | Insulin-like Growth Fac | -2.2                   | -1.9                   | ILGFBP3         | insulin-like growth factor  | Mmu.11638.2.S1_at       |
| Others         | Insulin-like Growth Fac | -3.0                   | -2.1                   | ILGFBP3         | insulin-like growth factor  | MmuSTS.2537.1.S1_at     |
| Others         | Insulin-like Growth Fac | -2.6                   | -1.5                   | ILGFBP3         | insulin-like growth factor  | MmugDNA.7729.1.S1_at    |
| Others         | Insulin-like Growth Fac | -2.1                   | -2.3                   | IGFBP6          | insulin-like growth factor  | MmugDNA.23639.1.S1_at   |
| Others         | Insulin-like Growth Fac | -2.2                   | -3.4                   | ILGFII          | Insulin-like growth factor  | Mmu.4374.2.S1_s_at      |
| Others         | Nucleosome structure    | 3.0                    | 2.9                    | LIMNB1          | lamin B1                    | MmuSTS.1539.1.S1_at     |
| Others         | Nucleosome structure    | 2.4                    | 2.2                    | LOC703073       | Histone H2A.x (H2a/x)       | MmuSTS.8.1.S1_at        |
| Others         | Nucleosome structure    | 2.0                    | 1.8                    | HIST1H4J        | histone cluster 1, H4j (ge  | MmugDNA.3247.1.S1_at    |
| Others         | Other                   | -2.0                   | -2.4                   | GSN             | gelsolin                    | MmugDNA.16424.1.S1_at   |
| Others         | Other                   | -2.0                   | -2.6                   | LOC713882       | smooth muscle myosin H      | MmugDNA.33337.1.S1_s_at |
| Others         | Post-Translational Mo   | 2.1                    | 1.7                    | SUV39H2         | suppressor of variegati     | MmugDNA.12443.1.S1_at   |
| Others         | Solute Carrier Family   | 2.3                    | 1.4                    | SLC7A5          | solute carrier family 7 (ca | MmuSTS.3879.1.S1_at     |
| Others         | Solute Carrier Family   | 2.0                    | 2.0                    | SLC31A1         | High-affinity copper upta   | Mmu.7190.1.A1_at        |
| Others         | Splicosome              | 1.6                    | 2.4                    | LSM5            | LSM5                        | MmugDNA.15339.1.S1_at   |
| Others         | Transcriptional Regulat | -2.1                   | -1.3                   | ---             | ---                         | MmugDNA.11023.1.S1_at   |
| Others         | Transcriptional Regulat | -2.0                   | -1.6                   | ID4             |                             | MmuSTS.2533.1.S1_at     |
| Others         | Transcriptional Regulat | 2.5                    | 1.6                    | ELL2            | elongation factor, RNA p    | MmuSTS.4317.1.S1_at     |
| Others         | Transcriptional Regulat | 2.2                    | 2.8                    | EAF2            | ELL associated factor 2     | MmugDNA.2321.1.S1_at    |
| Others         | Transcriptional Regulat | 3.0                    | 3.7                    | EZH2            | enhancer of zeste 2         | MmuSTS.911.1.S1_at      |
| Others         | Transcriptional Regulat | 2.1                    | 2.3                    | ATAD2           | ATPase family, two AAA      | MmugDNA.12475.1.S1_s_at |
| Others         | Transcriptional Regulat | 1.5                    | 2.2                    | ATAD2           | ATAD2                       | MmugDNA.5276.1.S1_at    |
| Others         | Transcriptional Regulat | 1.6                    | 2.1                    | ATAD2           | ATAD2                       | MmugDNA.31331.1.S1_at   |
| Others         | Transcriptional Regulat | 1.5                    | 2.3                    | NSBP1           | NSBP1                       | MmugDNA.32637.1.S1_at   |
| Others         | Transcriptional Regulat | 1.2                    | 2.1                    | ZNF326          | ZNF326                      | MmugDNA.4607.1.S1_at    |

| Classification       | Sub-Classification  | SM Fold Changes 14 dpi | SM Fold Changes 30 dpi | Gene Symbol         | Gene Name                   | Affymetrix ID           |
|----------------------|---------------------|------------------------|------------------------|---------------------|-----------------------------|-------------------------|
| Others               | Vesicle Trafficking | 2.6                    | 1.7                    | SEC24A              | SEC24 related gene fam      | MmugDNA.37864.1.S1_at   |
| Others               | Vesicle Trafficking | 2.2                    | 2.1                    | SEC24A              | SEC24 related gene fam      | MmugDNA.37865.1.S1_at   |
| Others               | Vesicle Trafficking | -1.6                   | -2.1                   | EHP1                | EH domain binding prote     | MmugDNA.41484.1.S1_at   |
| Others               | Vesicle Trafficking | -1.3                   | -2.8                   | SCFD1               | SCFD1                       | MmugDNA.27824.1.S1_at   |
| Others               |                     | 2.2                    | 2.0                    | ANP32E              | acidic (leucine-rich) nucle | MmugDNA.22578.1.S1_at   |
| Others               |                     | 2.4                    | 1.8                    | MTDH                | LYRIC/3D3                   | MmugDNA.81.1.S1_s_at    |
| Others               |                     | 2.3                    | 1.7                    | MTDH                | LYRIC/3D3                   | MmugDNA.81.1.S1_at      |
| Others               |                     | 2.4                    | 1.5                    | MTDH                | LYRIC/3D3/ metaderin        | Mmu.4898.1.S1_at        |
| Others               |                     | 2.6                    | 1.8                    | NME1                | non-metastatic cells 1, p   | MmugDNA.21289.1.S1_at   |
| Others               |                     | 5.0                    | 5.4                    | NSSATP9             | ---                         | MmugDNA.33823.1.S1_s_at |
| Others               |                     | 2.7                    | 3.3                    | TMPRSS3             | Transmembrane proteas       | MmuSTS.1653.1.S1_at     |
| Others               |                     | 3.6                    | 2.9                    | TRIP13              | thyroid hormone receptor    | MmuSTS.4722.1.S1_at     |
| Others               |                     | 2.8                    | 1.7                    | ARNTL2              | aryl hydrocarbon recepto    | MmugDNA.13595.1.S1_at   |
| Others               |                     | 2.6                    | 1.9                    | MOBK1B              | Mob1b                       | MmugDNA.6802.1.S1_at    |
| Others               |                     | 2.1                    | 1.8                    | MOBK1B              | Mob4B protein (Mps One)     | MmugDNA.23022.1.S1_s_at |
| Others               |                     | -3.2                   | -1.8                   | APBA2               | amyloid beta (A4) precur    | MmugDNA.18477.1.S1_at   |
| Others               |                     | -2.0                   | -1.6                   | CIRBP               | cold inducible RNA bindir   | MmugDNA.21025.1.S1_at   |
| Others               |                     | -2.3                   | -1.1                   | CNR1                | ---                         | MmugDNA.5294.1.S1_at    |
| Others               |                     | -2.5                   | -1.4                   | COCH                | coagulation factor C hom    | MmugDNA.12890.1.S1_at   |
| Others               |                     | -2.3                   | -1.2                   | COCH                | coagulation factor C hom    | MmuSTS.3519.1.S1_at     |
| Others               |                     | -2.2                   | -1.4                   | EPB41               | Erythrocyte membrane p      | MmugDNA.16997.1.S1_at   |
| Others               |                     | -2.0                   | -1.6                   | FRZB                | frizzled-related protein    | MmugDNA.39998.1.S1_at   |
| Others               |                     | -2.1                   | -1.5                   | INADL               | INADL                       | MmugDNA.26275.1.S1_at   |
| Others               |                     | -2.4                   | -2.2                   | LIN7A               | LIN-7 homolog A (LIN-7A)    | MmugDNA.33930.1.S1_at   |
| Others               |                     | -2.0                   | -1.4                   | MAP7                | microtubule-associated p    | MmugDNA.11043.1.S1_at   |
| Others               |                     | -2.0                   | 1.2                    | MBNL1               | Muscleblind-like (Drosop)   | MmugDNA.3546.1.S1_at    |
| Others               |                     | -2.1                   | -1.5                   | NEFH                | neurofilament, heavy pol    | MmugDNA.18337.1.S1_at   |
| Others               |                     | -2.6                   | -1.3                   | NOG                 | Noggin precursor            | MmugDNA.19120.1.S1_at   |
| Others               |                     | -2.1                   | -1.5                   | WIF1                | Wnt inhibitory factor 1     | MmuSTS.4753.1.S1_at     |
| Others               |                     | -2.4                   | -3.4                   | MYH11               | smooth muscle myosin h      | MmugDNA.15137.1.S1_at   |
| Others               |                     | -2.2                   | -3.2                   | MYH11               | smooth muscle myosin h      | MmugDNA.33337.1.S1_at   |
| Others               |                     | -2.2                   | -2.5                   | TPM2                | tropomyosin 2 (beta) iso    | MmugDNA.6549.1.S1_at    |
| Others               |                     | -1.2                   | 2.1                    | beta globin         | beta globin                 | MmugDNA.2571.1.S1_at    |
| Others               |                     | -1.1                   | 2.1                    | beta globin         | beta globin                 | MmugDNA.5184.1.S1_s_at  |
| Others               |                     | -1.2                   | 2.8                    | beta globin         | beta globin                 | MmuAffx.949.1.S1_x_at   |
| Others               |                     | 1.9                    | 2.2                    | DLEU2               | deleted in lymphocytic le   | MmugDNA.12590.1.S1_at   |
| Others               |                     | -1.2                   | 4.1                    | SPINK2              | serine protease inhibitor   | MmugDNA.18486.1.S1_s_at |
| Others               |                     | 2.1                    | 2.3                    | WDHD1               | WD repeat and HMG-box       | MmugDNA.18618.1.S1_at   |
| Others               |                     | -1.7                   | -4.2                   | MALAT1              | metastasis associated lur   | MmugDNA.13401.1.S1_s_at |
| Others               |                     | -2.0                   | -1.5                   | NTRK2               | TrkB                        | MmugDNA.41948.1.S1_at   |
| Hypothetical Protein |                     | 1.1                    | 2.2                    | ---                 | ---                         | MmugDNA.37488.1.S1_at   |
| Hypothetical Protein |                     | 1.3                    | 2.4                    | ---                 | ---                         | MmugDNA.18321.1.S1_at   |
| Hypothetical Protein |                     | 1.6                    | 2.6                    | ---                 | ---                         | MmugDNA.18007.1.S1_s_at |
| Hypothetical Protein |                     | 2.8                    | 2.7                    | ---                 | ---                         | MmugDNA.26428.1.S1_at   |
| Hypothetical Protein |                     | 1.6                    | 3.3                    | ---                 | ---                         | MmugDNA.18007.1.S1_at   |
| Hypothetical Protein |                     | -1.0                   | 2.0                    | LOC704002           | hypothetical protein LOC    | MmugDNA.32146.1.S1_at   |
| Hypothetical Protein |                     | 1.6                    | 2.2                    | WDR76               | WDR76                       | MmugDNA.9449.1.S1_at    |
| Hypothetical Protein |                     | -1.7                   | -2.5                   | ---                 | ---                         | MmugDNA.28691.1.S1_at   |
| Hypothetical Protein |                     | -1.8                   | -2.3                   | ---                 | ---                         | MmugDNA.29568.1.S1_at   |
| Hypothetical Protein |                     | -1.6                   | -2.2                   | LOC703106 // MAMU-I | hypothetical protein LOC    | MmugDNA.13887.1.S1_s_at |
| Hypothetical Protein |                     | -2.0                   | -1.7                   | ---                 | Transcribed locus, strong   | MmuAffx.23.12.S1_x_at   |
| Hypothetical Protein |                     | -2.4                   | -1.8                   | ---                 | Transcribed locus, strong   | MmuAffx.23.21.S1_s_at   |
| Hypothetical Protein |                     | -2.0                   | -1.5                   | ---                 | ---                         | MmugDNA.24683.1.S1_at   |
| Hypothetical Protein |                     | -2.5                   | -1.4                   | ---                 | ---                         | MmugDNA.20647.1.S1_at   |
| Hypothetical Protein |                     | -2.5                   | -1.4                   | ---                 | ---                         | MmugDNA.12998.1.S1_at   |
| Hypothetical Protein |                     | -2.0                   | -1.8                   | LOC100130976        | No network object found     | MmugDNA.36815.1.S1_at   |
| Hypothetical Protein |                     | -2.5                   | -1.3                   | LOC696781           | hypothetical protein LOC    | MmugDNA.28007.1.S1_at   |
| Hypothetical Protein |                     | -2.0                   | 1.0                    | LOC711574           | hypothetical protein LOC    | MmugDNA.13302.1.S1_at   |
| Hypothetical Protein |                     | -2.2                   | -1.5                   | MGC45871            | hypothetical protein        | MmugDNA.12660.1.S1_at   |
| Hypothetical Protein |                     | 2.3                    | 1.9                    | LOC696907           | hypothetical protein LOC    | MmugDNA.30940.1.S1_at   |
| Hypothetical Protein |                     | 2.2                    | 1.1                    | LOC700659           | hypothetical protein LOC    | MmugDNA.35877.1.S1_s_at |
| Hypothetical Protein |                     | 3.1                    | 1.8                    | LOC708602           | thymidylate kinase famil    | MmugDNA.21336.1.S1_at   |
| Hypothetical Protein |                     | 2.0                    | -1.2                   | LOC711872           | hypothetical protein LOC    | MmuSTS.4350.1.S1_at     |
| Hypothetical Protein |                     | 2.4                    | 1.3                    | LOC714457           | CG30497-PA, isoform A       | MmugDNA.28074.1.S1_at   |
| Hypothetical Protein |                     | 2.7                    | 1.3                    | LOC715967           | hypothetical protein LOC    | MmugDNA.23367.1.S1_s_at |
| Hypothetical Protein |                     | 2.6                    | 1.3                    | LOC715967           | hypothetical protein LOC    | MmugDNA.23367.1.S1_at   |
| Hypothetical Protein |                     | 2.6                    | 2.3                    | C28H8.3             | C28H8.3                     | MmugDNA.27193.1.S1_at   |
| Hypothetical Protein |                     | 2.3                    | 2.5                    | CCDC58              | coiled-coil domain conta    | MmugDNA.24837.1.S1_s_at |
| Hypothetical Protein |                     | 2.5                    | 2.4                    | CCDC99              | coiled-coil domain conta    | MmugDNA.303.1.S1_at     |
| Hypothetical Protein |                     | 4.4                    | 7.6                    | DEPDC1B (LOC709670) | DEP domain containing       | MmugDNA.28002.1.S1_at   |
| Hypothetical Protein |                     | 2.7                    | 4.1                    | FLJ40869            | hypothetical protein FLJ    | MmugDNA.31368.1.S1_at   |
| Hypothetical Protein |                     | 4.1                    | 4.4                    | LOC695836           | hypothetical protein LOC    | MmugDNA.2512.1.S1_at    |
| Hypothetical Protein |                     | 2.1                    | 2.6                    | LOC711569           | hypothetical protein LOC    | MmugDNA.32941.1.S1_at   |
| Hypothetical Protein |                     | 2.8                    | 2.6                    | LOC712570           | hypothetical protein LOC    | MmugDNA.43588.1.S1_at   |
| Hypothetical Protein |                     | 2.0                    | 2.0                    | LOC713624           | hypothetical protein LOC    | MmugDNA.26033.1.S1_at   |
| Hypothetical Protein |                     | 3.7                    | 3.4                    | LOC714686           | hypothetical protein LOC    | MmugDNA.1969.1.S1_at    |
| Hypothetical Protein |                     | 2.8                    | 2.1                    | LOC718812           | hypothetical protein LOC    | MmugDNA.33404.1.S1_at   |
| Hypothetical Protein |                     | 2.8                    | 2.4                    | LOC718812           | hypothetical protein LOC    | MmuSTS.340.1.S1_at      |
| Unknown              |                     | -2.4                   | -3.7                   | ---                 | ---                         | MmugDNA.23105.1.S1_at   |
| Unknown              |                     | -2.1                   | -5.9                   | ---                 | ---                         | MmugDNA.4718.1.S1_s_at  |
| Unknown              |                     | -1.8                   | -4.6                   | ---                 | ---                         | Mmu.12981.1.S1_at       |
| Unknown              |                     | 1.4                    | -4.0                   | ---                 | ---                         | Mmu.15103.2.S1_at       |

| Classification | Sub-Classification   | SM Fold Changes 14 dpi | SM Fold Changes 30 dpi | Gene Symbol          | Gene Name                  | Affymetrix ID           |
|----------------|----------------------|------------------------|------------------------|----------------------|----------------------------|-------------------------|
| Unknown        |                      | 1.4                    | -3.5                   | ---                  | ---                        | MmugDNA.41975.1.S1_at   |
| Unknown        |                      | -1.9                   | -3.3                   | ---                  | ---                        | Mmu.3126.6.S1_x_at      |
| Unknown        |                      | -1.9                   | -3.2                   | ---                  | ---                        | MmugDNA.10988.1.S1_at   |
| Unknown        |                      | -2.9                   | -2.8                   | ---                  | ---                        | MmunewRS.711.1.S1_at    |
| Unknown        |                      | -1.5                   | -2.6                   | ---                  | ---                        | MmugDNA.35103.1.S1_at   |
| Unknown        |                      | -1.4                   | -2.5                   | ---                  | ---                        | MmugDNA.36139.1.S1_at   |
| Unknown        |                      | 1.1                    | -2.4                   | ---                  | ---                        | MmuAffx.10.1.A1_x_at    |
| Unknown        |                      | -1.9                   | -2.3                   | ---                  | ---                        | Mmu.8637.1.S1_at        |
| Unknown        |                      | -1.5                   | -2.3                   | ---                  | ---                        | MmugDNA.17953.1.S1_at   |
| Unknown        |                      | -1.3                   | -2.3                   | ---                  | ---                        | MmugDNA.676.1.S1_at     |
| Unknown        |                      | -1.8                   | -2.2                   | ---                  | ---                        | MmugDNA.480.1.S1_at     |
| Unknown        |                      | -1.7                   | -2.2                   | ---                  | ---                        | MmugDNA.794.1.S1_s_at   |
| Unknown        |                      | -1.2                   | -2.2                   | ---                  | ---                        | MmugDNA.13526.1.S1_at   |
| Unknown        |                      | -2.9                   | -2.2                   | ---                  | ---                        | MmuSTS.3550.1.S1_s_at   |
| Unknown        |                      | -1.6                   | -2.2                   | ---                  | ---                        | MmugDNA.39472.1.S1_at   |
| Unknown        |                      | -1.5                   | -2.1                   | ---                  | ---                        | MmugDNA.1697.1.S1_at    |
| Unknown        |                      | -1.4                   | -2.1                   | ---                  | ---                        | MmugDNA.11078.1.S1_s_at |
| Unknown        |                      | 1.1                    | -2.1                   | ---                  | ---                        | MmunewRS.1070.1.S1_at   |
| Unknown        |                      | -1.7                   | -2.1                   | ---                  | ---                        | MmugDNA.5369.1.S1_at    |
| Unknown        |                      | -1.4                   | -2.0                   | ---                  | ---                        | MmugDNA.11513.1.S1_at   |
| Unknown        |                      | -1.4                   | -2.0                   | ---                  | ---                        | MmugDNA.19260.1.S1_at   |
| Unknown        |                      | -1.5                   | -2.0                   | EEF2 /// LOC699930   | Eukaryotic translation elo | MmugDNA.39128.1.S1_at   |
| Unknown        |                      | -1.4                   | -2.1                   | LOC699173            | hypothetical protein LOC   | MmugDNA.39398.1.S1_at   |
| Unknown        |                      | -1.6                   | -2.2                   | LOC711742            | kinesin family member 9    | MmugDNA.21343.1.S1_at   |
| Unknown        |                      | -1.5                   | -2.1                   | LOC722518            | CTCL tumor antigen L14     | MmugDNA.9437.1.S1_at    |
| Unknown        |                      | -1.4                   | -2.1                   | MAGED2               | melanoma antigen family    | Mmu.15555.1.S1_at       |
| Unknown        |                      | -1.3                   | 2.0                    | ---                  | ---                        | MmugDNA.14181.1.S1_at   |
| Unknown        |                      | 1.6                    | 2.2                    | ---                  | ---                        | MmugDNA.34770.1.S1_at   |
| Unknown        |                      | 1.5                    | 2.3                    | ---                  | ---                        | Mmu.1262.1.A1_at        |
| Unknown        |                      | 1.1                    | 2.1                    | ---                  | ---                        | MmugDNA.32373.1.S1_at   |
| Unknown        |                      | -1.2                   | 2.0                    | ---                  | ---                        | MmugDNA.42592.1.S1_at   |
| Unknown        |                      | 1.5                    | 2.0                    | ---                  | ---                        | MmugDNA.31152.1.S1_at   |
| Unknown        |                      | 1.1                    | 2.1                    | ---                  | ---                        | MmugDNA.42652.1.S1_at   |
| Unknown        |                      | 1.5                    | 2.1                    | ---                  | ---                        | MmugDNA.38077.1.S1_at   |
| Unknown        |                      | 1.2                    | 2.2                    | ---                  | ---                        | MmugDNA.16918.1.S1_at   |
| Unknown        |                      | 1.6                    | 2.2                    | ---                  | ---                        | MmugDNA.1283.1.S1_at    |
| Unknown        |                      | 1.4                    | 2.3                    | ---                  | ---                        | Mmu.16285.1.A1_at       |
| Unknown        |                      | 1.7                    | 2.4                    | ---                  | ---                        | MmugDNA.35036.1.S1_at   |
| Unknown        |                      | -1.1                   | 2.4                    | ---                  | ---                        | MmugDNA.7842.1.S1_at    |
| Unknown        |                      | 1.9                    | 2.7                    | ---                  | ---                        | MmugDNA.6095.1.S1_at    |
| Unknown        |                      | 1.3                    | 3.0                    | ---                  | ---                        | MmugDNA.580.1.S1_at     |
| Unknown        |                      | 1.2                    | 3.8                    | ---                  | ---                        | MmuAffx.949.1.A1_at     |
| Unknown        |                      | 1.4                    | 2.1                    | ---                  | ---                        | MmuSTS.711.1.S1_at      |
| Unknown        |                      | 1.3                    | 2.1                    | ---                  | ---                        | MmugDNA.27876.1.S1_at   |
| Unknown        |                      | 1.4                    | 2.1                    | ---                  | ---                        | MmugDNA.39220.1.S1_at   |
| Unknown        |                      | 1.8                    | 2.0                    | ---                  | ---                        | MmugDNA.43203.1.S1_at   |
| Unknown        |                      | 1.6                    | 2.0                    | ---                  | ---                        | MmugDNA.36.1.S1_at      |
| Unknown        |                      | 1.4                    | 2.0                    | ---                  | ---                        | MmugDNA.19588.1.S1_at   |
| Unknown        |                      | 1.6                    | 2.0                    | ---                  | ---                        | MmugDNA.29178.1.S1_at   |
| Unknown        |                      | 1.9                    | 2.1                    | C13orf3              | C13orf3                    | MmugDNA.23023.1.S1_at   |
| Unknown        |                      | 1.5                    | 2.2                    | LOC694209            | Protein FAM3C precursor    | MmugDNA.11181.1.S1_at   |
| Unknown        |                      | 1.9                    | 2.1                    | LOC695933            | ---                        | MmuSTS.55.1.S1_at       |
| Unknown        |                      | 1.0                    | 2.0                    | LOC696276            | CG7220-PA, isoform A       | MmugDNA.3104.1.S1_at    |
| Unknown        |                      | 2.0                    | 2.3                    | LOC707321            | ---                        | MmuSTS.2151.1.S1_at     |
| Unknown        |                      | 2.0                    | 3.3                    | LOC716218            | ---                        | MmuSTS.3922.1.S1_at     |
| Unknown        |                      | 4.0                    | 1.7                    | ---                  | ---                        | MmuSTS.4748.1.S1_at     |
| Unknown        |                      | 2.2                    | 1.4                    | ---                  | ???                        | MmugDNA.2759.1.S1_at    |
| Unknown        |                      | 2.2                    | 1.6                    | ---                  | ???                        | Mmu.2276.1.S1_at        |
| Unknown        |                      | 2.5                    | 1.8                    | CHAC2                | ChaC, cation transport re  | MmugDNA.66.1.S1_at      |
| Unknown        |                      | 2.1                    | 1.2                    | LOC697934            | Protein KIAA0152 precu     | MmugDNA.4669.1.S1_at    |
| Unknown        |                      | 2.1                    | 1.7                    | LOC700859            | CG11699-PA (chromosom      | MmugDNA.31089.1.S1_s_at |
| Unknown        |                      | 2.4                    | 1.9                    | LOC704099            | CG6597-PA, isoform A (     | MmugDNA.5478.1.S1_at    |
| Unknown        |                      | 2.2                    | 1.8                    | LOC715676            | ---                        | Mmu.12263.1.S1_at       |
| Unknown        |                      | 3.7                    | 3.0                    | ---                  | ---                        | MmuSTS.1531.1.S1_at     |
| Unknown        |                      | 3.1                    | 2.7                    | ---                  | ---                        | MmuSTS.1534.1.S1_at     |
| Unknown        |                      | 3.5                    | 2.1                    | ---                  | ---                        | Mmu.15507.1.S1_x_at     |
| Unknown        |                      | 1.9                    | 2.4                    | C14ORF106            | M18BP1                     | MmugDNA.6067.1.S1_at    |
| Unknown        |                      | 2.3                    | 3.2                    | C14ORF106            | chromosome 14 open re      | MmugDNA.5761.1.S1_at    |
| Unknown        |                      | 3.5                    | 2.7                    | C18ORF24             | chromosome 18 open re      | MmugDNA.39863.1.S1_at   |
| Unknown        |                      | 3.0                    | 2.8                    | DEPDC1 (LOC701888)   | DEP domain containing      | MmugDNA.29315.1.S1_at   |
| Unknown        |                      | 2.1                    | 2.9                    | DEPDC1 (LOC701888)   | DEP domain containing      | MmugDNA.40906.1.S1_at   |
| Unknown        |                      | 2.2                    | 2.0                    | FLJ10292 (LOC717824) | mago-nashi homolog         | MmugDNA.4402.1.S1_s_at  |
| Unknown        |                      | -2.6                   | -2.2                   | ---                  | ---                        | MmugDNA.11704.1.S1_at   |
| Unknown        |                      | -2.1                   | -4.6                   | ---                  | Transcribed locus          | Mmu.12981.1.S1_s_at     |
| Unknown        |                      | -2.0                   | -2.2                   | LOC716001            | steroid dehydrogenase      | MmugDNA.40447.1.S1_at   |
| Unknown        |                      | -2.3                   | 1.1                    | ---                  | ---                        | MmugDNA.21478.1.S1_at   |
| Unknown        |                      | -2.1                   | -1.7                   | ---                  | ---                        | MmugDNA.2555.1.S1_at    |
| Unknown        |                      | -2.3                   | -1.5                   | ---                  | ---                        | MmuSTS.4146.1.S1_at     |
| Unknown        |                      | -2.3                   | -1.3                   | ---                  | ---                        | MmugDNA.36051.1.S1_at   |
| Unknown        |                      | -2.0                   | -1.2                   | LOC709116            | Probable ATP-dependen      | MmugDNA.37035.1.S1_at   |
| Unknown        | Gene function unknow | 3.0                    | 2.0                    | ERCC6L               | excision repair cross-cor  | MmugDNA.27885.1.S1_at   |
| Unknown        | Gene function unknow | 2.0                    | 1.6                    | FAM54A (LOC705828)   | family with sequence sim   | MmugDNA.9831.1.S1_at    |



| Classification | Sub-Classification    | SM Fold Changes 14 dpi | SM Fold Changes 30 dpi | Gene Symbol                        | Gene Name                   | Affymetrix ID         |
|----------------|-----------------------|------------------------|------------------------|------------------------------------|-----------------------------|-----------------------|
| Unknown        | Gene function unknown | 2.9                    | 3.3                    | <a href="#">FAM54A (LOC705828)</a> | family with sequence sim    | MmugDNA.28821.1.S1_at |
| Unknown        | Gene function unknown | 2.7                    | 3.2                    | FAM83D (LOC697925)                 | Protein C20orf129           | MmugDNA.20671.1.S1_at |
| Unknown        | Gene function unknown | 2.5                    | 2.2                    | LOC574106                          | alpha-1-antichymotrypsin    | MmuSTS.2150.1.S1_at   |
| Unknown        | Gene function unknown | 2.5                    | 2.4                    | LOC699255                          | c-Mpl binding protein iso   | MmugDNA.38020.1.S1_at |
| Unknown        | Gene function unknown | 2.5                    | 3.0                    | ZNF367                             | zinc finger protein 367     | MmugDNA.40258.1.S1_at |
| Unknown        | Gene function unknown | 2.1                    | 1.2                    | ---                                | ---                         | Mmu.15443.1.S1_x_at   |
| Unknown        | Gene function unknown | 2.7                    | 1.1                    | <a href="#">ANKRD22</a>            | ankyrin repeat domain 2     | MmugDNA.11765.1.S1_at |
| Unknown        | Gene function unknown | 2.2                    | 1.1                    | <a href="#">ANKRD22</a>            | ankyrin repeat domain 2     | MmugDNA.3988.1.S1_at  |
| Unknown        | Gene function unknown | 2.6                    | 1.2                    | FAM46C                             | family with sequence sim    | MmugDNA.3623.1.S1_at  |
| Unknown        | Gene function unknown | -2.3                   | -1.0                   | ---                                | solute carrier family 26, n | MmuSTS.4436.1.S1_at   |
| Unknown        | Gene function unknown | -2.2                   | -1.3                   | LOC701902                          | ---                         | Mmu.8061.1.S1_at      |
| Unknown        | Gene function unknown | 1.6                    | 2.1                    | C18orf54                           | C18orf54                    | MmugDNA.12151.1.S1_at |
| Unknown        | Gene function unknown | 1.4                    | 2.3                    | GAS2L3                             | GAS2L3                      | MmugDNA.7107.1.S1_at  |

**Supplementary Table S9.** Gene expression correlated with CD8+Ki-67+ cells in SIVmac239 infected rhesus macaques. P-value (species/time) indicates the significance in log10 intensity gene expression between SIVsmm infected SM, SIVsmm-infected RMs, and SIVmac239-infected RMs. P-value (time) indicates the significance of gene expression changes after SIV infection in RMs and SMs.

| Affymetrix Probeset ID  | Gene Symbol | r Int, CD8+Ki-67+ | p-value (correlation) | p-value (species/time) | p-value (time) | RM-SIVmac239 |        |        |            |                | SM-SIVsmm |        |        |         |  |
|-------------------------|-------------|-------------------|-----------------------|------------------------|----------------|--------------|--------|--------|------------|----------------|-----------|--------|--------|---------|--|
|                         |             |                   |                       |                        |                | D10/D0       | D14/D0 | D30/D0 | Chronic/D0 | p-value (time) | D10/D0    | D14/D0 | D30/D0 | D180/D0 |  |
| MmugDNA.43348.1.S1_a    | SGOL2       | 0.83              | 6.06E-08              | 9.94E-01               | 4.55E-05       | 1.60         | 3.01   | 2.69   | 1.40       | 3.11E-04       | -1.31     | 1.85   | 1.55   | 1.00    |  |
| MmuSTS.4399.1.S1_a      | CDC48       | 0.80              | 2.78E-07              | 3.25E-01               | 1.51E-05       | 1.01         | 2.36   | 1.36   | 1.21       | 1.18E-01       | -0.95     | -0.68  | 1.27   | 1.18    |  |
| MmugDNA.33387.1.S1_a    | HIP2        | 0.79              | 4.48E-07              | 6.92E-01               | 1.37E-03       | 1.14         | 2.41   | 1.72   | 1.29       | 3.20E-05       | -1.18     | 1.55   | 1.22   | 1.09    |  |
| MmugDNA.17219.1.S1_a    | HIST1H3J    | 0.76              | 2.76E-06              | 1.82E-01               | 1.13E-09       | 1.34         | 3.97   | 1.76   | 1.11       | 1.65E-01       | -1.04     | 1.12   | 1.02   | 0.88    |  |
| MmuSTS.1955.1.S1_a      | RTN4        | 0.76              | 3.12E-06              | 3.44E-04               | 7.90E-06       | 1.08         | 2.24   | 1.57   | 1.17       | 5.83E-07       | 1.01      | 2.00   | 1.52   | 1.15    |  |
| MmuSTS.644.1.S1_a       | SDHD        | 0.75              | 3.44E-06              | 4.80E-02               | 7.32E-06       | 0.99         | 2.61   | 1.63   | 1.23       | 1.93E-02       | 0.81      | 1.53   | 1.26   | 1.07    |  |
| MmuSTS.1558.1.S1_a      | MELK        | 0.75              | 4.85E-06              | 6.94E-02               | 2.59E-05       | 1.21         | 5.76   | 2.49   | 1.85       | 1.48E-03       | -1.56     | 3.44   | 1.99   | 1.70    |  |
| MmugDNA.2976.1.S1_a     | HJURP       | 0.74              | 6.42E-06              | 2.64E-01               | 5.62E-07       | 1.12         | 2.18   | 1.48   | 1.10       | 1.11E-02       | -1.07     | 1.49   | 1.20   | 1.10    |  |
| MmugDNA.26033.1.S1_a    | CENPN       | 0.74              | 6.46E-06              | 1.37E-13               | 1.71E-04       | -0.89        | 2.58   | 1.70   | 1.28       | 6.12E-04       | -1.12     | 2.03   | -0.64  | -0.82   |  |
| MmugDNA.33823.1.S1_s_at | ---         | 0.74              | 7.74E-06              | 5.42E-01               | 3.83E-05       | 1.29         | 6.47   | 3.95   | 2.14       | 4.16E-08       | 0.77      | 5.20   | -0.38  | -0.79   |  |
| MmuSTS.1534.1.S1_a      | KIF20A      | 0.74              | 7.91E-06              | 7.80E-01               | 3.25E-05       | 1.15         | 2.31   | 1.64   | 1.18       | 5.06E-02       | 1.09      | 1.37   | 1.14   | 1.09    |  |
| MmugDNA.9770.1.S1_a     | GTSE1       | 0.73              | 8.46E-06              | 1.49E-03               | 9.44E-05       | 1.19         | 3.43   | 2.03   | 1.38       | 8.22E-07       | -1.16     | 1.88   | 1.44   | 1.22    |  |
| MmuSTS.144.1.S1_a       | MCM2        | 0.73              | 9.04E-06              | 9.08E-12               | 3.17E-04       | 1.33         | 2.28   | 1.85   | 1.33       | 2.87E-01       | -0.83     | 1.46   | 1.31   | 1.16    |  |
| MmuSTS.4250.1.S1_a      | RAD51AP1    | 0.73              | 9.32E-06              | 1.06E-02               | 1.79E-05       | 1.08         | 2.87   | 1.75   | 1.59       | 9.29E-06       | -1.34     | 1.81   | 1.35   | 1.13    |  |
| MmugDNA.12490.1.S1_a    | E2F8        | 0.73              | 1.15E-05              | 8.11E-01               | 2.11E-05       | -0.93        | 4.53   | 2.14   | 1.55       | 5.89E-04       | -1.37     | 2.20   | 1.28   | 1.15    |  |
| MmugDNA.38956.1.S1_a    | NUSAP1      | 0.73              | 1.16E-05              | 5.54E-01               | 9.61E-07       | -0.95        | 3.81   | 2.34   | 1.60       | 5.92E-08       | -1.31     | 3.09   | 1.73   | 1.06    |  |
| MmugDNA.23761.1.S1_a    | RAD51       | 0.73              | 1.19E-05              | 8.71E-01               | 6.13E-06       | -0.77        | 4.17   | 2.88   | 1.48       | 3.09E-04       | -1.31     | 1.83   | 1.38   | 1.07    |  |
| MmugDNA.22775.1.S1_a    | DIAPH3      | 0.73              | 1.23E-05              | 6.93E-01               | 2.66E-04       | 1.11         | 2.70   | 1.83   | 1.27       | 5.63E-04       | 0.74      | 1.55   | 1.09   | 1.03    |  |
| MmuSTS.3320.1.S1_a      | CCNE2       | 0.73              | 1.28E-05              | 5.82E-01               | 4.49E-05       | 1.07         | 3.88   | 1.83   | 1.52       | 3.04E-03       | 0.74      | 2.85   | 1.38   | 1.14    |  |
| MmugDNA.28002.1.S1_a    | DEPDC1B     | 0.72              | 1.32E-05              | 3.19E-01               | 2.66E-05       | 1.17         | 4.53   | 2.22   | 1.50       | 8.87E-04       | -1.40     | 1.99   | 1.44   | 1.16    |  |
| MmugDNA.10778.1.S1_a    | CDKN3       | 0.72              | 1.33E-05              | 1.90E-02               | 1.96E-05       | -0.86        | 4.34   | 2.34   | 1.59       | 6.78E-08       | -1.10     | 4.35   | 1.73   | 1.09    |  |
| MmugDNA.12988.1.S1_s_at | LOC703598   | 0.72              | 1.40E-05              | 5.65E-22               | 3.06E-04       | 1.09         | 2.52   | 1.78   | 1.44       | 2.26E-02       | -2.43     | 0.95   | 1.05   | 1.05    |  |
| MmugDNA.28020.1.S1_a    | BIRC5       | 0.72              | 1.64E-05              | 2.60E-01               | 8.14E-05       | 1.09         | 2.69   | 2.07   | 1.27       | 2.07E-04       | 0.92      | 1.75   | 1.38   | 1.01    |  |
| MmugDNA.4085.1.S1_a     | CCNE1       | 0.71              | 1.99E-05              | 6.89E-02               | 4.89E-04       | 1.18         | 2.84   | 1.95   | 1.48       | 8.67E-04       | -1.03     | 2.29   | 1.52   | 1.24    |  |
| MmugDNA.41887.1.S1_a    | MYBL2       | 0.71              | 2.01E-05              | 1.14E-04               | 3.00E-03       | 1.16         | 2.39   | 1.83   | 1.25       | 5.22E-05       | -0.91     | 1.75   | 1.51   | 1.14    |  |
| MmugDNA.4124.1.S1_a     | CDC45       | 0.71              | 2.43E-05              | 7.22E-01               | 1.32E-05       | 1.25         | 3.74   | 2.22   | 1.45       | 2.51E-05       | -1.00     | 2.04   | 1.55   | -0.88   |  |
| MmuSTS.1535.1.S1_a      | KIF2C       | 0.71              | 2.58E-05              | 4.93E-02               | 3.61E-08       | -0.91        | 4.09   | 2.18   | 1.45       | 1.36E-04       | -1.28     | 1.89   | 1.56   | 1.02    |  |
| MmugDNA.5873.1.S1_a     | CEP55       | 0.71              | 2.65E-05              | 5.42E-01               | 2.63E-05       | 1.11         | 5.24   | 2.57   | 1.81       | 8.08E-06       | -1.36     | 2.47   | 1.63   | 1.18    |  |
| MmuSTS.236.1.S1_a       | HMGGB3      | 0.70              | 3.35E-05              | 3.17E-14               | 4.55E-07       | 0.95         | 2.52   | 1.74   | 1.34       | 1.51E-03       | 0.21      | 1.28   | 0.67   | 0.87    |  |
| MmugDNA.32941.1.S1_a    | C16ORF75    | 0.70              | 3.38E-05              | 1.30E-30               | 1.82E-07       | 1.73         | 3.85   | 2.11   | 1.27       | 4.57E-03       | -0.83     | 2.07   | 0.88   | 0.75    |  |
| MmuSTS.2066.1.S1_a      | GINS2       | 0.70              | 3.44E-05              | 3.17E-03               | 1.56E-04       | 1.13         | 2.74   | 1.76   | 1.30       | 6.77E-06       | -0.92     | 1.96   | 1.43   | 1.14    |  |
| MmugDNA.9497.1.S1_a     | KIFC1       | 0.69              | 4.53E-05              | 5.18E-01               | 3.01E-06       | -0.84        | 2.72   | 1.66   | 1.32       | 7.19E-02       | -1.07     | 1.22   | 1.30   | 1.12    |  |
| MmugDNA.43588.1.S1_a    | C6ORF173    | 0.69              | 4.80E-05              | 3.39E-01               | 1.80E-07       | -0.99        | 2.39   | 1.58   | 1.24       | 1.66E-02       | -1.13     | 1.79   | 1.23   | 1.05    |  |
| MmuSTS.673.1.S1_s_at    | CHAFA1A     | 0.69              | 4.83E-05              | 4.28E-01               | 5.97E-06       | -0.89        | 3.75   | 1.94   | 1.40       | 3.06E-03       | -1.45     | 1.59   | 1.36   | 1.12    |  |
| MmuSTS.1653.1.S1_a      | TMPPRSS3    | 0.69              | 5.32E-05              | 6.02E-11               | 1.18E-05       | 0.99         | 2.30   | 1.79   | 1.32       | 3.12E-05       | -1.24     | 2.15   | 1.56   | 1.16    |  |
| MmugDNA.32729.1.S1_a    | MKI67       | 0.69              | 5.70E-05              | 8.08E-09               | 4.84E-06       | 0.94         | 4.07   | 2.45   | 1.68       | 2.64E-03       | -1.19     | 2.21   | 1.76   | 1.33    |  |
| MmuSTS.4722.1.S1_a      | TRIP13      | 0.69              | 5.77E-05              | 6.14E-02               | 1.53E-03       | 0.95         | 2.73   | 1.85   | 1.30       | 5.36E-05       | -1.30     | 1.90   | 1.40   | 1.14    |  |
| MmuSTS.4685.1.S1_a      | TYMS        | 0.68              | 5.93E-05              | 1.91E-06               | 4.13E-05       | 1.53         | 7.85   | 3.29   | 1.90       | 1.58E-06       | -0.95     | 3.43   | 2.65   | 1.23    |  |
| MmuSTS.2164.1.S1_a      | DDX10       | 0.68              | 6.03E-05              | 3.64E-03               | 1.92E-03       | 2.55         | 5.33   | 3.74   | 1.71       | 7.42E-06       | -0.76     | 3.80   | 2.08   | 1.16    |  |
| MmugDNA.21403.1.S1_a    | CDC43       | 0.68              | 6.20E-05              | 3.35E-01               | 1.58E-04       | -0.93        | 3.03   | 2.06   | 1.28       | 3.32E-05       | -1.24     | 2.11   | 1.26   | 1.09    |  |
| MmugDNA.23764.1.S1_a    | CCNA2       | 0.68              | 6.22E-05              | 2.80E-06               | 5.92E-06       | -1.08        | 2.50   | 1.52   | 1.39       | 1.34E-02       | -1.22     | 2.57   | 1.63   | -0.81   |  |
| MmugDNA.15754.1.S1_a    | CHEK1       | 0.68              | 6.28E-05              | 1.38E-01               | 7.27E-05       | 1.13         | 3.51   | 1.76   | 1.22       | 2.89E-05       | 0.80      | 1.98   | 1.33   | 1.08    |  |
| MmuSTS.4420.1.S1_a      | TPX2        | 0.68              | 7.21E-05              | 3.32E-03               | 1.15E-04       | 1.18         | 2.19   | 1.61   | 1.23       | 2.96E-01       | -0.96     | 1.31   | 1.29   | -0.85   |  |
| MmuSTS.3327.1.S1_a      | OIP5        | 0.68              | 7.63E-05              | 6.27E-01               | 3.85E-04       | -0.84        | 3.70   | 2.25   | 1.53       | 1.10E-03       | -1.05     | 2.17   | 1.57   | 1.27    |  |
| MmugDNA.14322.1.S1_a    | TFDP1       | 0.68              | 8.08E-05              | 2.58E-01               | 2.22E-03       | -0.93        | 2.35   | 1.76   | 1.39       | 9.46E-06       | -1.33     | 2.50   | 1.64   | 1.33    |  |
| MmuSTS.64.1.S1_a        | GMNN        | 0.67              | 8.99E-05              | 9.43E-01               | 5.65E-04       | -0.91        | 2.39   | 1.61   | 1.60       | 1.00E-04       | -1.49     | 2.91   | 1.46   | 0.93    |  |
| MmuSTS.4762.1.S1_a      | FBXO5       | 0.67              | 9.53E-05              | 2.20E-01               | 2.71E-04       | 0.96         | 2.14   | 1.39   | 1.31       | 2.60E-03       | -1.70     | 1.89   | 1.16   | 1.16    |  |
| MmugDNA.1969.1.S1_a     | MCM4        | 0.67              | 9.95E-05              | 6.87E-05               | 7.37E-05       | -0.93        | 4.04   | 1.92   | 1.40       | 1.16E-02       | -1.24     | 2.01   | 1.44   | 1.00    |  |
| MmugDNA.30746.1.S1_a    | LAG3        | 0.67              | 1.01E-04              | 9.80E-02               | 2.68E-04       | 1.32         | 3.07   | 1.69   | 1.31       | 9.33E-01       | -0.75     | 1.59   | 1.30   | 1.33    |  |
| MmugDNA.19989.1.S1_a    | DCC1        | 0.67              | 1.02E-04              | 1.10E-01               | 5.87E-03       | 1.03         | 3.07   | 1.83   | 1.32       | 2.19E-03       | -1.36     | 1.42   | 1.24   | 1.08    |  |
| MmugDNA.19464.1.S1_a    | UHRF1       | 0.67              | 1.03E-04              | 1.99E-01               | 1.86E-06       | 1.09         | 4.34   | 2.13   | 1.42       | 9.65E-05       | -1.65     | 1.85   | 1.43   | 1.06    |  |
| MmugDNA.15585.1.S1_a    | KIF15       | 0.67              | 1.10E-04              | 1.78E-01               | 3.92E-07       | 0.94         | 4.82   | 2.17   | 1.55       | 5.06E-03       | -1.64     | 2.98   | 1.37   | 1.04    |  |
| MmugDNA.15250.1.S1_a    | CENPA       | 0.67              | 1.10E-04              | 6.23E-02               | 1.31E-05       | 0.93         | 4.38   | 2.48   | 1.61       | 1.48E-06       | -1.22     | 3.01   | 1.80   | 1.21    |  |
| MmuSTS.2645.1.S1_a      | FENT        | 0.66              | 1.15E-04              | 5.85E-01               | 2.77E-06       | -1.04        | 2.51   | 1.47   | 1.28       | 6.20E-03       | -1.26     | 1.55   | 1.30   | 1.08    |  |
| MmuSTS.2070.1.S1_s_at   | MICB        | 0.66              | 1.18E-04              | 2.68E-01               | 6.41E-05       | 1.03         | 2.89   | 1.61   | 1.22       | 4.29E-01       | 0.91      | 1.06   | 1.20   | 1.08    |  |
| MmugDNA.21462.1.S1_a    | KIF4A       | 0.66              | 1.23E-04              | 9.76E-02               | 3.67E-05       | -0.85        | 2.41   | 1.46   | 1.13       | 2.37E-02       | -1.03     | 1.34   | 1.17   | 1.20    |  |
| MmugDNA.11364.1.S1_a    | FOXM1       | 0.66              | 1.27E-04              | 1.34E-01               | 2.73E-04       | 1.14         | 2.87   | 2.01   | 1.44       | 6.20E-03       | -1.06     | 1.89   | 1.48   | 1.20    |  |
| MmuSTS.2303.1.S1_s_at   | DLG7        | 0.66              | 1.29E-04              | 3.26E-01               | 5.49E-05       | -0.99        | 2.59   | 1.34   | 1.23       | 2.54E-02       | -1.07     | 1.50   | 1.41   | 1.08    |  |
| MmugDNA.40742.1.S1_a    | CNNB2       | 0.66              | 1.32E-04              | 9.29E-01               | 4.76E-06       | 1.08         | 5.80   | 2.74   | 1.68       | 3.91E-09       | 0.96      | 4.30   | 2.43   | 1.37    |  |
| MmuSTS.1779.1.S1_a      | NEK2        | 0.66              | 1.35E-04              | 1.31E-01               | 3.42E-04       | -1.05        | 3.69   | 2.60   | 1.58       | 4.23E-05       | 0.79      | 2.59   | 1.82   | 1.15    |  |
| MmunewRS.661.1.S1_a     | HIST1H4C    | 0.66              | 1.36E-04              | 4.83E-13               | 1.83E-05       | -1.15        | 3.07   | 2.57   | 1.70       | 3.53E-02       | -1.76     | 5.36   | 1.98   | 0.84    |  |
| MmugDNA.18794.1.S1_a    | CDC20       | 0.66              | 1.36E-04              | 1.96E-05               | 3.77E-05       | 1.07         | 5.16   | 2.57   | 1.64       | 3.23E-05       | -0.92     | 2.61   | 1.82   | 1.29    |  |
| MmugDNA.29315.1.S1_a    | DEPDC1      | 0.66              | 1.43E-04              | 6.40E-07               | 4.97E-05       | -0.91        | 2.89   | 2.12   | 1.28       | 5.18E-07       | -1.19     | 3.15   | 1.57   | 0.97    |  |
| MmugDNA.11747.1.S1_a    | MLF1IP      | 0.66              | 1.43E-04              | 3.85E-03               | 4.66E-06       | 0.92         | 3.82   | 2.09   | 1.48       | 5.81E-07       | -1.77     | 1.68   | 1.25   | 1.06    |  |
| MmugDNA.14257.1.S1_a    | CCNF        | 0.66              | 1.50E-04              | 1.77E-02               | 3.17E-06       | -1.06        | 2.16   | 1.41   | 1.12       | 2.30E-02       | -1.22     | 1.34   | 1.20   | -0.87   |  |
| MmugDNA.41835.1.S1_a    | DHFR        | 0.66              | 1.55E-04              | 8.99E-01               | 2.77E-06       | 0.85         | 3.05   | 1.46   | 1.27       | 3.57E-03       | -1.33     | 1.34   | 1.45   | -0.91   |  |
| MmugDNA.31369.1.S1_a    | RRM2        | 0.65              | 1.58E-04              | 1.62E-01               | 2.58E-04       | 1.27         | 8.14   | 3.87   | 2.24       | 2.30E-07       | -1.24     | 7.11   | 3.50   | 1.54    |  |
| MmugDNA.2694.1.S1_a     | ZWINT       | 0.65              | 1.67E-04              | 2.51E-01               | 1.87E-05       | 0.94         | 3.20   | 1.96   | 1.61       | 5.92E-04       | -1.26     | 2.50   | 1.76   | 1.30    |  |
| MmuSTS.2201.1.S1_a      | SIL         | 0.65              | 1.68E-04              | 3.03E-01               | 2.09E-04       | 1.01         | 2.26   | 1.50   | 1.43       | 4.81E-03       | -1.29     | 1.31   | 1.31   | 1.19    |  |
| MmugDNA.30056.1.S1_a    | TYMS        | 0.65              | 1.69E-04              | 1.61E-06               | 1.29E-05       | 1.32         | 4.35   | 2.31   | 1.51       | 4.83E-04       | 0.90      | 1.90   | 1.72   | 1.11    |  |
| MmugDNA.2768.1.S1_a     | NUF2        | 0.65              | 1.75E-04              | 6.55E-01               | 7.28E-05       | -0.86        | 3.25   | 1.51   | 1.35       | 2.59E-02       | -1.17     | 1.50   | 1.19   | 1.08    |  |
| MmugDNA.14959.1.S1_a    | CDC2        | 0.65              | 1.76E-04              | 2.21E-01               | 2.89E-04       | 1.06         | 2.11   | 1.40   | 1.30       | 3.54E-03       | -1.07     | 1.36   | 1.23   | 1.02    |  |
| MmugDNA.31059.1.S1_s_at | PTTG1       | 0.65              | 1.98E-04              | 1.19E-09               | 1.92E-04       | -0.98        | 2.49   | 1.46   | 1.23       | 1.55E-03       | -1.11     | 2.27   | 1.66   |         |  |

| Affymetrix Probeset ID | Gene Symbol  | r Int. CDB+Kl. 67+ (log10) | p-value (correlation) | p-value (species/time) | p-value (time) | D10/D0 | D14/D0 | D30/D0 | Chronic/0 | p-value (time) | D10/D0 | D14/D0 | D30/D0 | D180/D0 |
|------------------------|--------------|----------------------------|-----------------------|------------------------|----------------|--------|--------|--------|-----------|----------------|--------|--------|--------|---------|
| MmugDNA.38781.1.S1_a   | LOC698390    | 0.64                       | 2.62E-04              | 1.43E-09               | 5.86E-03       | -1.29  | 2.03   | 2.15   | 1.66      | 2.98E-04       | -1.03  | 7.79   | 2.09   | 0.91    |
| MmugDNA.2512.1.S1_a    | RPS-998N21.9 | 0.64                       | 2.67E-04              | 9.11E-01               | 4.66E-04       | 1.27   | 2.01   | 1.52   | 1.26      | 1.87E-04       | -1.10  | 1.45   | 1.19   | -1.01   |
| MmugDNA.24430.1.S1_a   | CDC25A       | 0.63                       | 3.19E-04              | 2.18E-11               | 1.30E-04       | -0.97  | 3.16   | 1.99   | 1.54      | 2.61E-01       | -1.23  | 1.46   | 1.44   | 1.18    |
| MmugDNA.25197.1.S1_a   | ASPM         | 0.63                       | 3.21E-04              | 6.87E-02               | 1.06E-04       | -0.98  | 2.44   | 1.78   | 1.22      | 1.74E-04       | 0.79   | 2.31   | 1.50   | 1.03    |
| MmuSTS.3576.1.S1_a     | CCNA2        | 0.63                       | 3.25E-04              | 2.91E-02               | 2.51E-04       | 1.06   | 3.40   | 1.94   | 1.57      | 2.01E-04       | -1.07  | 2.30   | 1.80   | 1.28    |
| MmuSTS.2164.1.S1_s_a   | DDX10        | 0.63                       | 3.51E-04              | 5.14E-01               | 4.38E-04       | 2.10   | 6.45   | 2.91   | 1.73      | 9.45E-04       | -0.85  | 2.41   | 1.83   | -0.78   |
| MmugDNA.35622.1.S1_a   | KIF14        | 0.63                       | 3.53E-04              | 8.12E-01               | 2.20E-04       | 0.99   | 2.39   | 1.56   | -0.85     | 2.79E-02       | -1.17  | 1.41   | 1.25   | 1.10    |
| MmuSTS.2071.1.S1_a     | RAD54L       | 0.63                       | 3.55E-04              | 9.10E-01               | 2.94E-05       | 1.01   | 2.17   | 1.44   | 1.09      | 2.67E-04       | -1.07  | 1.50   | 1.30   | -0.82   |
| MmuSTS.1531.1.S1_a     | KIF14        | 0.63                       | 3.64E-04              | 5.28E-02               | 1.87E-05       | -1.07  | 2.61   | 1.55   | 1.22      | 1.59E-02       | -1.26  | 1.34   | 1.23   | 1.13    |
| MmugDNA.38470.1.S1_a   | NDC80        | 0.63                       | 3.67E-04              | 3.09E-03               | 1.29E-03       | 1.69   | 3.35   | 1.90   | 1.56      | 1.97E-01       | 1.13   | 1.85   | 1.40   | 1.11    |
| MmuSTS.2866.1.S1_a     | SYMN1        | 0.62                       | 3.82E-04              | 2.42E-01               | 2.46E-06       | -1.20  | 2.19   | 1.30   | 1.07      | 5.65E-06       | -1.42  | 1.53   | 1.24   | 1.24    |
| MmuSTS.4157.1.S1_a     | MAD2L1       | 0.62                       | 3.93E-04              | 9.90E-01               | 1.40E-05       | -1.23  | 2.50   | 1.73   | 1.53      | 6.23E-05       | -1.69  | 3.11   | 1.57   | 1.19    |
| MmuSTS.23023.1.S1_a    | C13ORF3      | 0.62                       | 4.10E-04              | 7.24E-01               | 2.09E-05       | -0.94  | 2.45   | 1.54   | 1.21      | 3.40E-02       | -1.14  | 1.40   | -0.86  | -0.92   |
| MmugDNA.17680.1.S1_a   | PRR11        | 0.62                       | 4.33E-04              | 3.33E-01               | 7.60E-06       | 0.92   | 2.27   | 1.56   | 1.28      | 2.04E-04       | 0.81   | 1.05   | 1.41   | 1.15    |
| MmugDNA.35559.1.S1_a   | HIST1H1D     | 0.62                       | 4.84E-04              | 1.26E-01               | 1.83E-05       | -0.88  | 3.91   | 2.22   | 1.33      | 3.50E-03       | -1.23  | 1.40   | 1.33   | 1.23    |
| MmuSTS.3275.1.S1_a     | RRM2         | 0.62                       | 4.87E-04              | 5.15E-08               | 7.87E-04       | -0.79  | 6.11   | 2.81   | 1.89      | 8.50E-08       | -0.88  | 4.92   | 2.31   | 1.18    |
| MmugDNA.35654.1.S1_a   | CAPZA2       | 0.61                       | 5.23E-04              | 2.01E-02               | 4.02E-06       | -1.10  | 2.55   | 1.53   | 1.33      | 1.74E-04       | -1.41  | 1.65   | 1.32   | 1.21    |
| MmugDNA.11567.1.S1_a   | NCPAG        | 0.61                       | 5.67E-04              | 8.01E-04               | 8.19E-06       | 1.08   | 4.49   | 2.43   | 1.85      | 1.29E-04       | -1.43  | 2.81   | 1.68   | -0.92   |
| MmugDNA.21515.1.S1_a   | PRC1         | 0.61                       | 5.69E-04              | 1.51E-01               | 1.22E-06       | 0.91   | 2.81   | 1.68   | 1.39      | 1.31E-06       | 0.70   | 2.05   | 1.49   | 0.97    |
| MmugDNA.2975.1.S1_a    | POLR2        | 0.61                       | 5.71E-04              | 3.41E-02               | 8.84E-06       | 0.99   | 2.50   | 1.64   | 1.48      | 9.22E-06       | 0.84   | 2.35   | 1.56   | 1.12    |
| MmugDNA.41268.1.S1_a   | CCNB1        | 0.61                       | 5.95E-04              | 2.83E-09               | 2.48E-05       | 0.92   | 3.10   | 1.77   | 1.51      | 3.63E-04       | -1.28  | 3.07   | 1.93   | 1.12    |
| MmuSTS.2698.1.S1_a     | HIST1H2BH    | 0.61                       | 6.01E-04              | 2.37E-01               | 3.39E-04       | 1.02   | 2.07   | 1.68   | 1.17      | 3.54E-03       | 0.90   | 1.73   | 1.09   | 0.95    |
| MmugDNA.13565.1.S1_a   | KIF11        | 0.61                       | 6.03E-04              | 2.91E-01               | 1.05E-05       | 0.90   | 4.25   | 2.02   | 1.97      | 2.20E-05       | -1.51  | 2.31   | 1.57   | -0.85   |
| MmuSTS.4348.1.S1_a     | IGHG1        | 0.61                       | 6.11E-04              | 6.26E-02               | 7.27E-04       | 1.00   | 3.04   | 2.37   | 2.74      | 3.14E-04       | 1.26   | 5.77   | 2.81   | 1.06    |
| MmugDNA.3558.1.S1_a    | AURKA        | 0.61                       | 6.16E-04              | 1.74E-20               | 1.42E-06       | 1.02   | 2.17   | 1.60   | 1.18      | 1.47E-01       | 0.94   | 1.21   | 1.35   | 1.04    |
| MmugDNA.24523.1.S1_a   | CDC2A        | 0.61                       | 6.21E-04              | 2.26E-01               | 3.43E-04       | 1.20   | 2.62   | 1.61   | 1.37      | 2.52E-02       | 0.88   | 1.38   | 1.02   | 0.99    |
| MmuSTS.3714.1.S1_a     | FHL2         | 0.61                       | 6.44E-04              | 2.65E-15               | 5.26E-06       | -0.91  | 2.09   | 1.33   | 0.95      | 5.53E-02       | -1.36  | 1.13   | 1.05   | 1.14    |
| MmugDNA.3020.1.S1_a    | ZWILCH       | 0.60                       | 6.56E-04              | 6.62E-04               | 3.55E-04       | 1.11   | 2.12   | 1.45   | 1.31      | 3.51E-01       | 0.71   | 1.51   | 1.29   | 0.98    |
| MmuSTS.2672.1.S1_a     | CENPF        | 0.60                       | 6.63E-04              | 9.41E-08               | 2.07E-05       | 0.85   | 2.34   | 1.37   | 1.61      | 1.47E-03       | -1.43  | 1.64   | 1.31   | 1.08    |
| MmugDNA.6277.1.S1_a    | BUB1         | 0.60                       | 6.80E-04              | 2.89E-01               | 2.78E-04       | 1.89   | 5.80   | 2.47   | 1.63      | 4.13E-05       | 1.11   | 2.23   | 1.96   | 1.38    |
| MmuSTS.3318.1.S1_a     | CCNB1        | 0.60                       | 7.09E-04              | 9.28E-01               | 1.97E-05       | 0.82   | 2.25   | 1.29   | 1.19      | 5.39E-02       | 0.66   | 1.56   | 1.06   | 1.08    |
| MmugDNA.18123.1.S1_a   | RFC3         | 0.60                       | 7.28E-04              | 9.69E-01               | 1.08E-04       | -1.16  | 2.11   | 1.37   | 1.14      | 1.24E-03       | 0.57   | 2.28   | 1.28   | 1.11    |
| MmugDNA.5663.1.S1_a    | PLS3         | 0.59                       | 8.52E-04              | 1.17E-10               | 7.93E-05       | 0.97   | 2.14   | 1.29   | 1.11      | 6.47E-06       | 0.95   | 3.90   | 0.84   | 0.85    |
| MmugDNA.7866.1.S1_a    | CDT1         | 0.59                       | 9.92E-04              | 5.42E-01               | 1.46E-03       | 1.13   | 2.23   | 1.45   | 1.24      | 3.24E-03       | -0.95  | 1.22   | -0.69  | 1.14    |
| MmugDNA.38434.1.S1_a   | GZMA         | 0.59                       | 1.02E-03              | 3.34E-11               | 3.58E-06       | 0.94   | 12.81  | 2.54   | 2.53      | 9.48E-06       | -1.75  | 6.15   | 1.70   | 3.00    |
| MmugDNA.31030.1.S1_a   | LOC91431     | 0.59                       | 1.02E-03              | 8.12E-06               | 3.07E-05       | -1.01  | 2.19   | 1.21   | 1.13      | 1.94E-01       | -1.30  | 1.22   | 1.18   | 1.01    |
| MmugDNA.13584.1.S1_a   | KIF23        | 0.58                       | 1.09E-03              | 4.42E-02               | 9.47E-06       | 0.91   | 2.50   | 1.64   | 1.48      | 6.61E-04       | -1.42  | 1.37   | 1.22   | -0.98   |
| MmugDNA.2951.1.S1_a    | ANLN         | 0.58                       | 1.09E-03              | 5.33E-01               | 8.26E-06       | -0.97  | 2.31   | 1.51   | 1.15      | 6.77E-05       | -1.30  | 1.53   | 1.15   | 0.96    |
| MmugDNA.38963.1.S1_a   | C18ORF24     | 0.58                       | 1.12E-03              | 8.88E-03               | 2.74E-03       | -0.79  | 3.73   | 2.48   | 1.78      | 7.29E-03       | -0.94  | 2.95   | 1.71   | 1.27    |
| MmugDNA.34150.1.S1_s_a | MGC4677      | 0.58                       | 1.12E-03              | 1.80E-04               | 3.79E-03       | -0.57  | 1.95   | 2.40   | 1.46      | 2.86E-01       | 1.28   | 1.68   | 1.30   | 1.07    |
| MmugDNA.30164.1.S1_a   | TIPIN        | 0.58                       | 1.17E-03              | 7.72E-01               | 4.29E-04       | -0.89  | 2.71   | 1.48   | 1.31      | 1.46E-02       | -1.24  | 1.63   | 1.39   | 1.06    |
| MmugDNA.3247.1.S1_s_a  | HIST2H4B     | 0.58                       | 1.33E-03              | 5.71E-01               | 2.54E-03       | -1.00  | 2.07   | 1.53   | 1.23      | 1.23E-04       | -0.79  | 2.25   | 1.62   | 1.28    |
| MmugDNA.42135.1.S1_a   | BFXO5        | 0.58                       | 1.36E-03              | 8.12E-01               | 4.42E-04       | -0.93  | 2.01   | 1.32   | 1.27      | 2.61E-02       | -1.40  | 1.45   | 1.33   | 0.96    |
| MmugDNA.34901.1.S1_a   | SDF2L1       | 0.57                       | 1.46E-03              | 1.23E-01               | 1.59E-03       | 1.00   | 2.09   | 1.30   | 1.30      | 3.14E-01       | 1.18   | 2.07   | 1.64   | 1.39    |
| MmugDNA.39221.1.S1_a   | HAVCR2       | 0.57                       | 1.49E-03              | 1.04E-03               | 2.34E-06       | -0.73  | 3.32   | 1.34   | 1.22      | 7.85E-02       | -0.94  | 1.41   | 1.37   | 1.16    |
| MmuSTS.1283.1.S1_a     | DTL          | 0.57                       | 1.64E-03              | 9.86E-03               | 2.43E-03       | 3.11   | 6.52   | 2.61   | 1.86      | 3.85E-06       | -0.80  | 3.03   | -0.64  | -0.90   |
| MmuSTS.673.1.S1_a      | CHAF1A       | 0.57                       | 1.73E-03              | 4.54E-01               | 6.87E-05       | -1.06  | 2.44   | 1.23   | 1.22      | 2.05E-02       | -1.07  | 1.38   | 1.32   | -0.82   |
| MmugDNA.16154.1.S1_a   | MSRB2        | 0.56                       | 1.74E-03              | 8.95E-21               | 6.19E-05       | -0.82  | 2.05   | 1.44   | 1.13      | 9.84E-01       | -0.77  | 1.39   | 1.23   | 1.32    |
| MmugDNA.19272.1.S1_s_a | SPAG5        | 0.56                       | 2.09E-03              | 6.10E-01               | 3.43E-04       | -0.94  | 3.37   | 1.72   | 1.37      | 1.36E-01       | 0.98   | 1.44   | 1.47   | 1.13    |
| MmuSTS.911.1.S1_a      | ALDH9A1      | 0.55                       | 2.22E-03              | 6.03E-02               | 2.10E-04       | 1.08   | 2.62   | 1.59   | -0.58     | 4.04E-03       | 1.11   | 2.37   | 1.43   | 1.07    |
| MmuSTS.1343.1.S1_a     | TFDP1        | 0.55                       | 2.23E-03              | 3.85E-02               | 1.20E-03       | 1.44   | 3.81   | 1.67   | -0.80     | 6.69E-01       | -0.77  | -0.59  | -0.75  | -0.81   |
| MmugDNA.31059.1.S1_a   | PTTG1        | 0.55                       | 2.35E-03              | 5.14E-09               | 6.32E-05       | -1.13  | 2.24   | 1.30   | 1.26      | 1.01E-04       | -0.92  | 2.02   | 1.95   | 1.43    |
| MmuSTS.2509.1.S1_a     | H2AFJ        | 0.55                       | 2.35E-03              | 2.18E-03               | 1.12E-04       | -0.96  | 2.04   | 1.34   | 1.13      | 4.74E-01       | -0.68  | 2.17   | 1.64   | 1.11    |
| MmugDNA.8456.1.S1_a    | KDELRA3      | 0.55                       | 2.44E-03              | 6.77E-01               | 3.15E-04       | 1.16   | 2.20   | 1.49   | 1.18      | 8.81E-03       | -1.24  | 1.37   | 0.89   | 1.01    |
| MmugDNA.14856.1.S1_a   | CDC6         | 0.55                       | 2.56E-03              | 7.38E-05               | 1.70E-06       | 1.01   | 2.29   | 1.47   | 1.22      | 4.71E-03       | -1.10  | 1.63   | 1.29   | 1.08    |
| MmugDNA.34591.1.S1_s_a | IGKC         | 0.55                       | 2.57E-03              | 2.16E-01               | 1.33E-05       | -1.07  | 2.18   | 1.28   | 1.15      | 1.61E-01       | 0.90   | 1.50   | 1.31   | 1.21    |
| MmugDNA.20669.1.S1_a   | FAM111B      | 0.55                       | 2.58E-03              | 1.84E-01               | 6.15E-05       | -0.86  | 2.87   | 1.24   | 1.11      | 3.72E-03       | -1.26  | 1.15   | 1.08   | 0.94    |
| MmugDNA.865.1.S1_a     | PCNA         | 0.54                       | 2.84E-03              | 3.62E-02               | 3.09E-04       | -1.05  | 2.15   | 1.38   | 1.31      | 3.29E-04       | -1.29  | 1.99   | 1.49   | 1.12    |
| MmugDNA.18586.1.S1_a   | SMC2         | 0.54                       | 3.10E-03              | 2.18E-03               | 9.53E-05       | -1.17  | 2.59   | 1.72   | -0.65     | 4.33E-03       | -1.71  | 3.02   | -0.63  | -0.76   |
| MmugDNA.22076.1.S1_a   | MGC29506     | 0.54                       | 3.28E-03              | 9.81E-03               | 6.07E-03       | -1.23  | 2.15   | -0.44  | 1.67      | 2.37E-04       | -0.99  | 5.43   | 2.50   | 1.00    |
| MmuSTS.1347.1.S1_a     | HMCGB2       | 0.53                       | 3.39E-03              | 1.03E-01               | 7.26E-07       | 0.84   | 2.41   | 1.30   | -0.82     | 1.90E-03       | -1.47  | 1.99   | 1.51   | 1.25    |
| MmugDNA.43394.1.S1_a   | RNF157       | 0.53                       | 3.40E-03              | 9.10E-01               | 2.90E-08       | 0.81   | 2.65   | 1.06   | 1.18      | 1.13E-02       | 0.86   | 1.29   | -0.67  | -0.78   |
| MmugDNA.7428.1.S1_a    | WHSC1        | 0.53                       | 3.52E-03              | 3.87E-02               | 1.56E-05       | -1.16  | 2.05   | 1.18   | 1.22      | 6.83E-04       | -1.22  | 1.57   | 1.23   | 1.21    |
| Mmu.6559.1.S1_s_a      | LOC701387    | 0.53                       | 3.62E-03              | 2.48E-04               | 8.24E-04       | 1.22   | 3.49   | 1.46   | 1.09      | 4.42E-01       | 1.57   | 2.97   | 2.09   | 1.07    |
| MmugDNA.8750.1.S1_a    | PHF19        | 0.53                       | 3.98E-03              | 6.25E-01               | 6.71E-04       | 0.99   | 2.86   | 1.34   | -0.83     | 4.90E-04       | -1.08  | -0.57  | 1.47   | -0.89   |
| Mmu.14249.1.S1_a       | CCR5         | 0.53                       | 4.01E-03              | 4.70E-02               | 1.46E-03       | 1.08   | 2.84   | 1.51   | -0.64     | 9.37E-01       | -1.07  | -1.00  | -1.05  | -1.02   |
| MmuSTS.61.1.S1_a       | HELLS        | 0.52                       | 4.35E-03              | 3.38E-03               | 6.72E-04       | 0.89   | 2.08   | 1.23   | 1.58      | 1.89E-04       | -2.00  | 1.82   | 1.21   | 0.98    |
| MmugDNA.30376.1.S1_a   | IGKC         | 0.52                       | 4.39E-03              | 2.55E-02               | 1.07E-05       | 0.85   | 2.75   | 1.30   | 1.13      | 1.72E-02       | -1.27  | 1.79   | -0.70  | 1.23    |
| MmuSTS.8.1.S1_a        | H2AFX        | 0.52                       | 4.61E-03              | 2.02E-03               | 1.26E-05       | 0.88   | 2.29   | 1.30   | 1.12      | 1.41E-02       | -0.91  | 1.89   | 1.62   | 1.25    |
| MmuSTS.4740.1.S1_a     | F13A1        | 0.51                       | 5.19E-03              | 4.61E-17               | 8.79E-04       | 1.45   | 2.20   | 1.30   | 0.98      | 3.25E-01       | 1.15   | 1.16   | 1.04   | 1.30    |
| MmugDNA.37873.1.S1_a   | MYLK         | 0.51                       | 5.66E-03              | 5.01E-01               | 2.24E-04       | -0.77  | 2.80   | 1.13   | 0.85      | 6.54E-01       | -1.21  | 0.84   | 0.74   | 0.79    |
| MmugDNA.27586.1.S1_a   | CCC-1        | 0.51                       | 5.87E-03              | 1.54E-06               | 2.22E-05       | -1.50  | 2.40   | -0.78  | 1.28      | 1.81E-05       | -2.15  | 1.79   | 1.47   | -0.78   |
| MmugDNA.2951.1.S1_s_a  | ANLN         | 0.51                       | 5.93E-03              | 2.90E-01               | 2.95E-05       | -1.01  | 4.27   | 2.07   | 1.30      | 1.27E-04       | -1.49  | 1.46   | 1.37   | -0.89   |
| Mmu.7460.4.S1_a        | RIR2DL4      | 0.50                       | 6.32E-03              | 4.04E-03               | 8.7            |        |        |        |           |                |        |        |        |         |

RM-SIVmac239

SM-SIVsmm

| Affymetrix Probeset ID | Gene Symbol | r<br>Int, CD8+Ki-<br>67+ | p-value<br>(correlation) | p-value<br>(species/time) | p-value<br>(time) | RM-SIVmac239 |        |        |            | SM-SIVsmm         |        |        |        |         |
|------------------------|-------------|--------------------------|--------------------------|---------------------------|-------------------|--------------|--------|--------|------------|-------------------|--------|--------|--------|---------|
|                        |             |                          |                          |                           |                   | D10/D0       | D14/D0 | D30/D0 | Chronic/D0 | p-value<br>(time) | D10/D0 | D14/D0 | D30/D0 | D180/D0 |
| MmugDNA.17530.1.S1_a   | SULF2       | -0.54                    | 3.21E-03                 | 3.45E-01                  | 9.17E-04          | -1.77        | -2.11  | -1.65  | -1.03      | 1.36E-01          | -0.65  | -0.95  | -0.86  | -1.05   |
| MmugDNA.8010.1.S1_a    | IL7R        | -0.54                    | 3.08E-03                 | 1.86E-01                  | 6.66E-03          | -1.44        | -1.19  | -2.23  | -1.71      | 2.43E-01          | -1.32  | -1.13  | -1.15  | -1.06   |
| MmugDNA.34681.1.S1_a   | SORL1       | -0.54                    | 2.74E-03                 | 2.34E-08                  | 3.71E-03          | -2.26        | -1.68  | -1.97  | -1.32      | 8.79E-02          | -0.96  | -1.41  | -0.99  | -1.17   |
| MmugDNA.32882.1.S1_a   | LOC718964   | -0.55                    | 2.34E-03                 | 1.56E-02                  | 4.23E-04          | -2.07        | -1.85  | -1.97  | -1.20      | 1.55E-01          | -1.47  | -1.20  | -1.09  | -1.51   |
| MmugDNA.4335.1.S1_a    | HERC1       | -0.59                    | 1.05E-03                 | 2.04E-19                  | 3.21E-03          | -1.60        | -1.30  | -2.02  | -1.18      | 8.86E-03          | -0.86  | -1.48  | -0.93  | -1.64   |
| MmugDNA.41593.1.S1_a   | C20ORF32    | -0.63                    | 3.07E-04                 | 5.99E-08                  | 1.06E-05          | -1.25        | -2.35  | -1.97  | -0.88      | 4.77E-01          | -1.03  | -1.44  | -0.98  | -1.32   |

**Supplementary Table S10. Oligonucleotide Primer Sequences used for Real-Time PCR.**

| <b>cDNA</b>                                  | <b>Forward (5'-3')</b>      | <b>Reverse (5'-3')</b>        |
|----------------------------------------------|-----------------------------|-------------------------------|
| <b><u>SYBR</u></b>                           |                             |                               |
| GAPDH                                        | GAAGGTGAAGGTCGGAGTC         | CAAGCTTCCCGTTCTCAGCC          |
| G1P2                                         | TCCTGGTGAGGAATAACAAGGG      | GTCAGCCAGAACAGGTCGTC          |
| G1P3                                         | GGTCTGCGATCCTGAATGGG        | TCACTATCGAGATACTTGTGGGT       |
| OAS1                                         | GGAAAGGGCTCCAGTGTTATC       | GGATCAAGAGTCCCACCTGAAAA       |
| OAS2                                         | CAGTCCTGGTGAGTTTGAGT        | GCCAGTGCTTTATCAAGAGGAT        |
| GBP1                                         | TTCTGAACAAAGAGACGATAGCC     | AGGAGTTCCTTCAAAGATGTGGA       |
| GBP2                                         | TTTTTCCAGCATTGTGTGGACT      | CTTTAGCGAAAGCTCCAAGTAGT       |
| IFIT3                                        | TCAGAAGTCTAGTCACTTGGGG      | ACACCTTCGCCCTTTCATTTT         |
| MX1                                          | AGGAGTTGCCCTTCCCAGA         | TCGTTCACAAGTTTCTTCAGTTTCA     |
| MX2                                          | CAGAGGCAGCGGAATCGTAA        | CTGAAGCTCTAGCTCGGTGT          |
| BST2                                         | GAG TGT CGC AAT GTC ACC CAT | GGA AGC CAT TAG GGC CAT CAC   |
| ZC3HAV1                                      | AGG CTA CTG TAA CCC CGG AAT | CCA TAC TGA ATC CAT GTG CCA G |
| TRIM22                                       | CTG TCC TGT GTG TCA GAC CAG | TGG GCT CAT CTT GAC CTC TTT   |
| <b><u>TaqMan</u>      <u>Material #.</u></b> |                             |                               |
| GAPDH                                        | AB# Rh02621745_g1           |                               |
| INDO                                         | AB# Rh02841203_m1           |                               |
| CXCL10                                       | AB# Rh02788358_m1           |                               |
